# Supplementary material for: Evidence for a Saponin Biosynthesis Pathway in the Body Wall of the Commercially Significant Sea Cucumber Holothuria scabra
Source: MDPI journal article supplement (doi:10.3390/md15110349), 2017-11-07
Supplement: s1 [file s1]

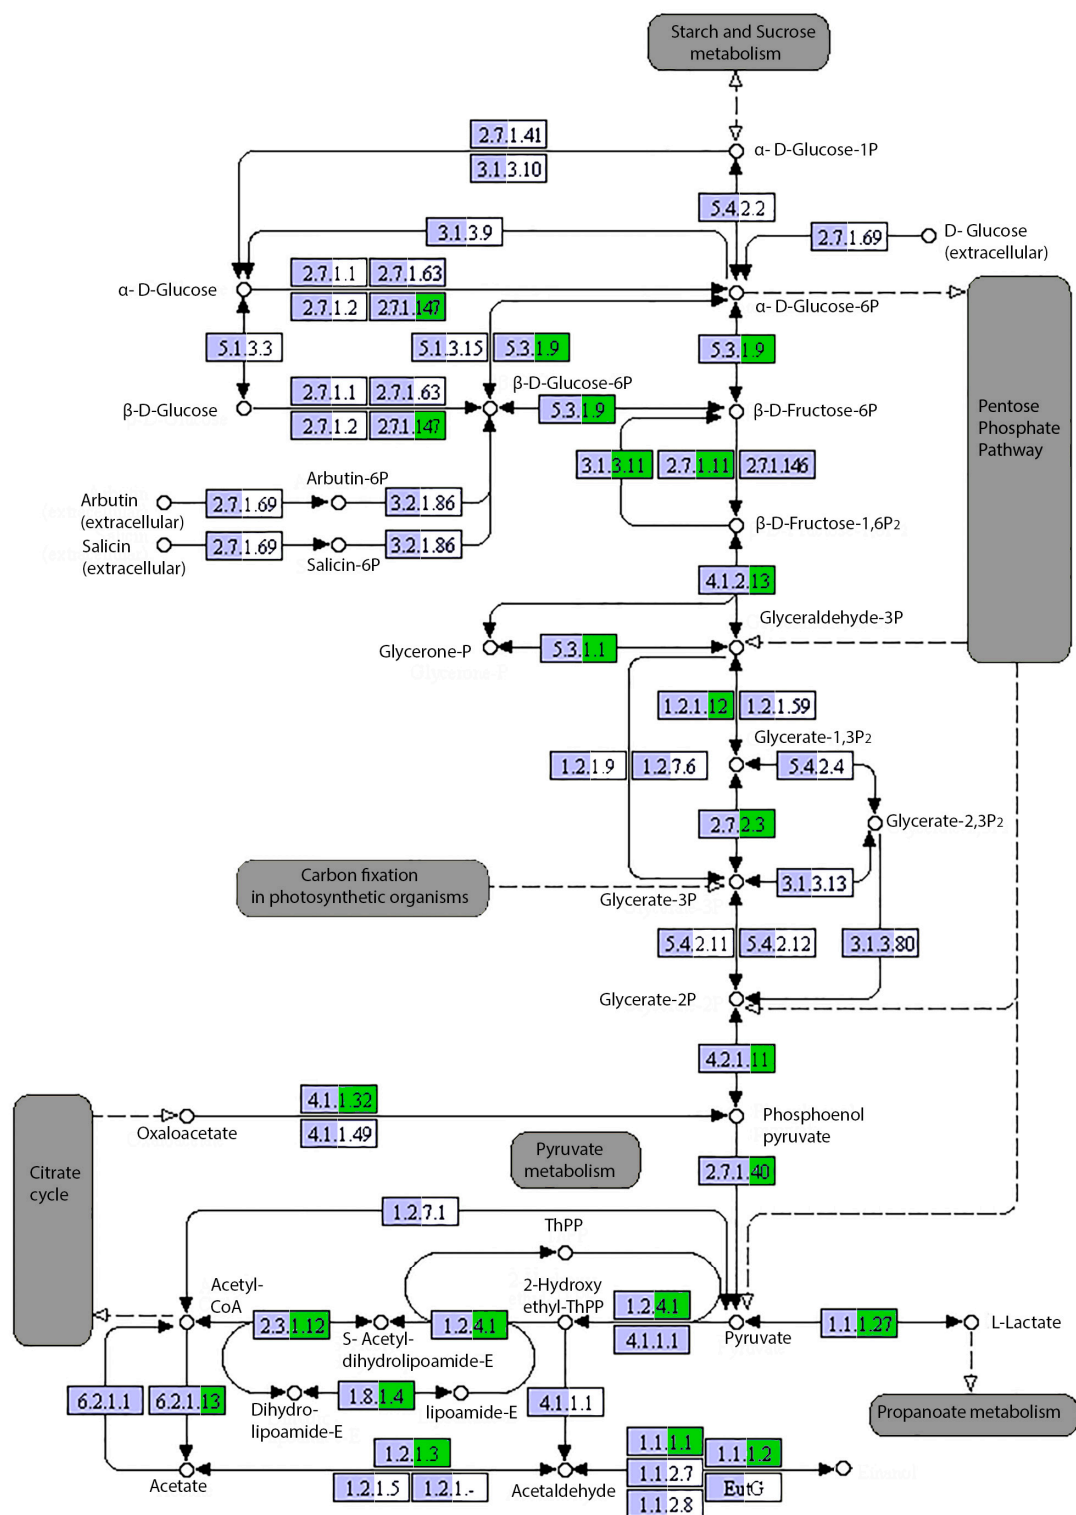

**Figure S1.** Biosynthetic routes of glycolysis cycle from *H. scabra* body wall and radial nerve transcriptomes with gene annotation number. Violet squares represent genes detected in the body wall transcriptome, while green squares represent genes detected in the radial nerve transcriptome.
