# Supplementary material for: Evidence for a Saponin Biosynthesis Pathway in the Body Wall of the Commercially Significant Sea Cucumber Holothuria scabra
Source: MDPI journal article supplement (doi:10.3390/md15110349), 2017-11-07
Supplement: s1 [file s1]

## Pfam analysis of core saponin biosynthesis enzyme:

| Enzyme                   | Pfam                 | Start | End | E-value  |
|--------------------------|----------------------|-------|-----|----------|
| Thiolase                 | Thiolase_N           | 11    | 271 | 8.3e-84  |
|                          | Thiolase_C           | 278   | 400 | 3.1e-47  |
| HMG CoA_Synthase         | HMG_CoA_synt_N       | 14    | 187 | 7.8e-101 |
|                          | HMG_CoA_synt_C       | 188   | 471 | 2.9e-105 |
| HMG CoA reductase        | Transmembrane region | 20    | 42  | N/A      |
|                          | Patched              | 56    | 287 | 1.6e-9   |
|                          | Sterol-sensing       | 86    | 235 | 1.6e-18  |
|                          | Low complexity       | 405   | 420 | N/A      |
|                          | Low complexity       | 435   | 454 | N/A      |
|                          | HMG-CoA_red          | 506   | 886 | 2.3e-149 |
| Mevalonate kinase        | GHMP_kinases_N       | 3     | 80  | 2.8e-18  |
| Phosphomevalonate_kinase | P-mevalo_kinase      | 12    | 124 | 4.2e-47  |
|                          | P-mevalo_kinase      | 14    | 125 | 4.5e-46  |
| Squalene synthase        | SQS_PSY              | 46    | 319 | 2.8e-42  |
|                          | Transmembrane region | 378   | 400 | N/A      |
| Farnesyl pyrophosphate   | Polyprenyl_synt      | 52    | 318 | 2.9e-81  |
| Squalene epoxidase       | FAD_binding_3        | 51    | 254 | 1.5e-8   |
|                          | SE                   | 97    | 368 | 3.8e-110 |

>Thiolase-A\_Lepeophtheirus\_salmonis

MTVGRALEKAIFVVGAKRTAFGAFFGSLKSQTPVDLQTIAGKAALESQKVNPEVDSVVVGNVLSACSSDAPYIAR  
HVGLRLGIRERVPALTVNRLCGSGFQSIIVNGVQEMMMGDASVLTGGSDNMSACPFALRDVRFHGKLGSDMK  
MEDMMWASLTDAHIKSPMGITAENLAVKYNITRAEVDAYALRSQTTWAAAHEAGIFKHEITPIEMKSRKGTIVFQ  
VDENPKPKTTIESITKLPPVFKKDGVTCAASASGICDGAGAVVLASEEAVKAHGYEPLARIVGYGITGCDPNIMGIGP  
VPSIRALCDKTGISLEQVDYIEINEAFAAQVLACQKELGIPDEKFNTCGGGISIGHPLAASGSRISAHLVHKLKHNNKR  
YGIGSACIGGGQGIAILFESL

>HMGCoA\_Synthase-1

MPGFQRMTSPSGHWPDPNVGIAALEIYFPSQYVDQTELETFDGASAGKYTVGLGQGKMGFCSDREDINSLCLTVIQ  
NLMENNQIPFDAIGRLEVGTETIIDKSKSVKTVLMQLFEDSGNTDLEGIDTTNACYGGTAALFNALSWVESSAWDG  
RYALVVAGDIAVYATGNARPTGGAGAVAMLVGPHAPLVIERGLRSTHMQHVYDFYKPDMSSEYPRVDGKLSIQC  
YLGALDKCYERYIAKAEALQKVGEAGRITVDSFDGMCHSPFCKLVQKSLARLVNDFLHDPSPDTSEGSRYASVEA  
FRDVKLKDTFFDKNVEKAFMTASKEVYQQKTHPSRLANQVGNMYTPSLYGGVSVIASVPLDELPNKRIALFSYGS

GMASLYSIRVVKDASPGSPLAKVRNSLNDLEARLESRRVCVPGVFADTMKLREDTHHLAKYTPQGSIEDLFPGTW  
YLTYVDEMQRQYNRSSSQQAQVDSQQIIQETLKEKSVEDMETAEQVTVS

>HMGCoA\_reductase

MLSRLFLAQGRFCSSHPWEVIVCTLTLTICMLSMNYFTGLPRICGWNIECAPQVKESLSSDVLVCMIMRTLAVAY  
LYLQFTKLRTTGSKYILGIAGLFTIFSSFLSSAVIHLFGLELTGLNEALPFFLLIDLTAKASALTKFALSSTTQNEVVDNIAR  
GMAILGPTITLDTVVTTLVISIGTMSSIRKMEVFCCFGILSIANYFVFMFTFFPACLSLVLELSNSNKYGRPVWHLGRF  
AEVLEEEEDRKNPNPVVQRVKMIMRGLVLVHAHSYWLASNDTELMSRDMLYDGNLLTDKKIDPTMPLWEFYATRL  
WPPTLDYILTALATVLASHYIFFSDLATYPEKRVSIMEGHEVVNPGSDHEDASEVETIGTLSSSPSTSDVRVIESMTSR  
TQACQTDPTASPRNSRSSSPVSSHVKPARFTIGSSGSGSEDEEEVIKEEEVEWVLETELKAPRPMPELLEILNVG  
KGPNALTDDEVQLLVGAKHIPAYKLENILDNPERGVAVRRQIISKLLPITDALEKLPYASYDYFSVSGACCENVIGYMP  
VPVGVAGPLLLDGQEFQVPMATTEGCLVASTNRCRALRSAGGIHSLVIGDGMTRGPLVRLPSAQEAGAIKQWLE  
VPENFAAIKERFESTSRFAKLKSIQTALAGRYMFLRFKALTGDAMGMNMISKGTEQALHALQTMFPNIEIMSLSGN  
YCTDKKVAAINWIEGRGKSVVCEATVPAHIVQQVLKTSASALVDLNIHKNLVGSAMAGSIGGFNAHAANIVTAIYIA  
TGQDAAQNIASSNCMTLMETRGPKGGLYLSCTMPSIELGTVGGGTVLPQSACLQMMDVKGSNIHGSGLNAS  
QLARIVCATVMAGELSLMSALAAGHLVKSHMKHNRSALNIASPLSIDEVATHRRSKSVDFSAKESSAAAPGTCTA  
NAS

>Mevalonate kinase

MNALAASNLPAGAGLSSAAFSASLVSGLLIFSGKLQMPVPGCDWTGQELELINKWAFEGEKVIHGNPSGVDNAV  
SVFGGALRYKSKIFERLHEMPSLRVLLINTKVPRSTKVLVAGVKGKLEKYPGVIPVFDSDIEDISQRCEALLSSLWHLEK  
EDDSAEGVTHNQVKL

>Phosphomevalonate\_kinase

MDSSHPKAVLVFSGKRKSGKDFTCALLKERLGXDVTILTSAPLKQCQFAEIHGLDYEQLLSASSYKERYRHDMVVW  
GEKKRNEDPSIFCRLATLDVSTQHKVWLISDARRKTDVAYFKETYSRAKLVRVQADESIRASRGYVFKKGVDSET  
ECGLDEGVSWDYVITNNGDEDDLDRLQLQLISSIQDGLINEINTDVS

>Phosphomevalonate kinase

MASRANSRPRVIFVSGKRKSGKDYVTSLLQERLGSSCIILRLSGPLKKQYASENNLDFQKLLDASEYKERYRDDMIKW  
GEKIRRKDSGYFCRLATDEAKSDHTIWIVSDARRPSDIEYFKKLYPKETVTVRVDTDLEVRARRGFVFTPGIDDAASE  
CGLDSYSKWNVVLNRNGNQADLENQLQLLTYMAKGDGDVKR

>Squalene synthase

MDIQALLHPDDLNFRLFKCGGGQHILPKQDLSSLSPPVAQKCYYYLKKTSRSFAAVIQALDGDRLRHAVCIFYLVLRAL  
DTVEDDMTIDMKEKVVLLQTFYQKLEIQEWSYHKSQEKDKAVLEDFPVISCEYRNLAEGYRIVISDITRRMGCGMSE  
FIQREVTTMADWNMYCHYVAGLVGIGLSRLFSASELEDKIVGEDKKLANSMGLFLQKTNIIRDYLEDVREQREFWP  
KEAWSKYAAELGDLQKPENITQAVHCLNELITNALCHVPDVLVYMSRIKNQSVNFCAIPQVMAAATLAKCYNNP  
DVFSGVVKIRRGQTVGLMMESTSMKKLRQVMRQYAEIGEKPSPDNFMATKQMCLLISDLRPEVNFQKQV  
MQQTLLGVVIAIVLVVLWYF

>Farnesyl pyrophosphate

MNGVAQKIAQMALDARKDSDFGELFEKLVDDLTADDAANPEITEAANRFKEVLRYNVPHGKRNRGLSVVSSFRY  
LANSSQLTETNLKAMVLGWCVELLQSYFLIADDMMDQSKTRRGQQCWYLVKVGNDAINSIFYEASIKLLKKY  
FREEPYVNLLELFHETNYQTIVGQALDLSSTSEYGNVLDLDRFTQERYDAIVKWKTAFYSFYLPVALAMYMAGNSQP  
EAHKSAKIILLKMGHFFQVQDDFLDCYGDPDVIGKIGTDIEEQKCGWLVVQALKVVTPEQRKILENNYGVDDKDKV  
SAVKQLYKDLDESIFYKYEEESYEDLMKLIDEHSKNLPKEMFIAYAKRIFKRKK

>Squalene epoxidase

>MDCAENIDARSVGYVIHDLDSKSKVDISYPKDEGDHVKSGRAFHGHGRFVMGLRRAAMKQESVTYIEGTVTKILE  
QDNCVIGVIYKKKGQEQEQEIYAPLTVVADGCFSKFRKSLITTNVKTTSHFVGTIMKNCPQIKDNHAELVLANPSPVL  
IYRIAEKDTRVLVDVRGTM PKDMKGYMSQKIHPQLPEHIKEPFLDSLQNDIRSMPSFLPPAPIEKPGVLLGDAM  
NMRHPLTGGGMSVALNDVRIWRELLKGIPDLDDHDKIIQSMRTFWLRKNSHSFVVNVLAQALYELFAATDRHL  
MQLRRACFH YFKLGGQAVSGPVGLLSVLQPRPFVLIGHFFAVALYAIYFAFKSQSWLTKPFALVESVWIFAKACMVL  
FPLIRSEMHSIK
