# Supplementary material for: Evidence for a Saponin Biosynthesis Pathway in the Body Wall of the Commercially Significant Sea Cucumber Holothuria scabra
Source: Mar Drugs. 2017 Nov 7;15(11):349. doi: 10.3390/md15110349 (PMC5706039; doi:10.3390/md15110349)
Supplement: Supplementary file 1 [file marinedrugs-15-00349-s001.zip]

Archive with 4 entries (4 files):
- File S3.pdf
- marinedrugs-220948-supplementary.pdf
- File S1.xls
- File S2 (a and b).xlsx
