# Supplementary material for: Evidence for a Saponin Biosynthesis Pathway in the Body Wall of the Commercially Significant Sea Cucumber Holothuria scabra
Source: Mar Drugs. 2017 Nov 7;15(11):349. doi: 10.3390/md15110349 (PMC5706039; doi:10.3390/md15110349)
Supplement: Supplementary file 1 [file marinedrugs-15-00349-s001.zip › File S1.xls]

gene_id	Sample_name	Read_count	FPKM	Gene Length	NR GI	NR ID	NR Score	NR Evalue	NR Description	NT GI	NT ID	NT Score	NT Evalue	NT Description	KO ID	KO Name	KO Description	Http Link	Swissprot ID	Swissprot Score	Swissprot Evalue	Swissprot Description	PFAM ID	PFAM description	Gene Ontology Biological Pathway	BP Description	Gene Ontology Molecular Function	MF Description	Gene Ontology Cellular Component	CC Description	KOG ID	KOG Description
c0_g1	SC	1.00	4.37	221	--	--	--	--	--	--	--	--	--	--	--	--	--	--	--	--	--	--	--	--	--	--	--	--	--	--	--	--
c100000_g1	SC	3.00	6.95	244	--	--	--	--	--	--	--	--	--	--	--	--	--	--	--	--	--	--	--	--	--	--	--	--	--	--	--	--
c100001_g1	SC	2.00	2.90	267	--	--	--	--	--	--	--	--	--	--	--	--	--	--	--	--	--	--	--	--	--	--	--	--	--	--	--	--
c100003_g1	SC	3.00	21.57	207	--	--	--	--	--	--	--	--	--	--	--	--	--	--	--	--	--	--	--	--	--	--	--	--	--	--	--	--
c100004_g1	SC	2.00	2.67	272	--	--	--	--	--	--	--	--	--	--	--	--	--	--	--	--	--	--	--	--	--	--	--	--	--	--	--	--
c100006_g1	SC	3.00	7.12	243	--	--	--	--	--	--	--	--	--	--	--	--	--	--	--	--	--	--	--	--	--	--	--	--	--	--	--	--
c100007_g1	SC	2.00	4.23	248	--	--	--	--	--	--	--	--	--	--	--	--	--	--	--	--	--	--	--	--	--	--	--	--	--	--	--	--
c100008_g1	SC	7.00	1.66	519	--	--	--	--	--	--	--	--	--	--	--	--	--	--	--	--	--	--	--	--	--	--	--	--	--	--	--	--
c10000_g1	SC	8.00	5.00	335	--	--	--	--	--	--	--	--	--	--	--	--	--	--	--	--	--	--	--	--	--	--	--	--	--	--	--	--
c100010_g1	SC	1.00	2.83	236	--	--	--	--	--	--	--	--	--	--	--	--	--	--	--	--	--	--	--	--	--	--	--	--	--	--	--	--
c100011_g1	SC	2.00	3.01	265	--	--	--	--	--	--	--	--	--	--	--	--	--	--	--	--	--	--	--	--	--	--	--	--	--	--	--	--
c100012_g1	SC	7.00	2.31	436	--	--	--	--	--	--	--	--	--	--	--	--	--	--	--	--	--	--	--	--	--	--	--	--	--	--	--	--
c100013_g1	SC	3.00	5.05	259	--	--	--	--	--	--	--	--	--	--	--	--	--	--	--	--	--	--	--	--	--	--	--	--	--	--	--	--
c100014_g1	SC	2.00	2.42	278	780089251	XP_011673826.1	135	8.9009e-08	PREDICTED: E3 ubiquitin-protein ligase RAD18-like isoform X1 [Strongylocentrotus purpuratus]>gi|780089256|ref|XP_011673827.1| PREDICTED: E3 ubiquitin-protein ligase RAD18-like isoform X2 [Strongylocentrotus purpuratus]	--	--	--	--	--	--	--	--	--	--	--	--	--	PF00302//PF15926	Chloramphenicol acetyltransferase//E3 ubiquitin-protein ligase RNF220	GO:0090263//GO:0016567//GO:0042967	positive regulation of canonical Wnt signaling pathway//protein ubiquitination//acyl-carrier-protein biosynthetic process	GO:0008811	chloramphenicol O-acetyltransferase activity	--	--	--	--
c100015_g1	SC	4.00	8.28	249	--	--	--	--	--	--	--	--	--	--	--	--	--	--	--	--	--	--	--	--	--	--	--	--	--	--	--	--
c100016_g1	SC	4.00	4.13	289	--	--	--	--	--	--	--	--	--	--	--	--	--	--	--	--	--	--	--	--	--	--	--	--	--	--	--	--
c100017_g1	SC	1.00	0.54	354	--	--	--	--	--	--	--	--	--	--	--	--	--	--	--	--	--	--	PF09268	Clathrin, heavy-chain linker	GO:0006886//GO:0016192	intracellular protein transport//vesicle-mediated transport	GO:0005198	structural molecule activity	GO:0030132//GO:0030130	clathrin coat of coated pit//clathrin coat of trans-Golgi network vesicle	--	--
c100018_g1	SC	8.00	5.23	330	--	--	--	--	--	--	--	--	--	--	--	--	--	--	--	--	--	--	--	--	--	--	--	--	--	--	--	--
c100019_g1	SC	1.00	7.19	207	--	--	--	--	--	--	--	--	--	--	--	--	--	--	--	--	--	--	--	--	--	--	--	--	--	--	--	--
c100021_g1	SC	1.00	4.51	220	--	--	--	--	--	--	--	--	--	--	--	--	--	--	--	--	--	--	--	--	--	--	--	--	--	--	--	--
c100022_g1	SC	4.00	1.20	458	780111863	XP_003725942.2	292	1.11298e-27	PREDICTED: leucine-rich repeat and death domain-containing protein 1 [Strongylocentrotus purpuratus]	--	--	--	--	--	--	--	--	--	Q8C0R9	218	3.37137e-19	Leucine-rich repeat and death domain-containing protein 1 OS=Mus musculus GN=Lrrd1 PE=2 SV=2	PF00560//PF13855	Leucine Rich Repeat//Leucine rich repeat	--	--	GO:0005515	protein binding	--	--	KOG0532	Leucine-rich repeat (LRR) protein, contains calponin homology domain
c100023_g1	SC	6.00	2.42	397	--	--	--	--	--	--	--	--	--	--	--	--	--	--	--	--	--	--	--	--	--	--	--	--	--	--	--	--
c100024_g1	SC	2.00	4.14	249	--	--	--	--	--	--	--	--	--	--	--	--	--	--	--	--	--	--	--	--	--	--	--	--	--	--	--	--
c100025_g1	SC	1.00	3.74	226	--	--	--	--	--	--	--	--	--	--	--	--	--	--	--	--	--	--	--	--	--	--	--	--	--	--	--	--
c100026_g1	SC	1.00	8.11	204	--	--	--	--	--	--	--	--	--	--	--	--	--	--	--	--	--	--	--	--	--	--	--	--	--	--	--	--
c100027_g1	SC	2.00	2.76	270	780164997	XP_796750.4	217	8.71352e-19	PREDICTED: organic cation transporter protein isoform X1 [Strongylocentrotus purpuratus]	--	--	--	--	--	K08202	SLC22A4_5, OCTN	MFS transporter, OCT family, solute carrier family 22 (organic cation transporter), member 4/5	http://www.genome.jp/dbget-bin/www_bget?ko:K08202	Q9VCA2	119	4.06495e-07	Organic cation transporter protein OS=Drosophila melanogaster GN=Orct PE=1 SV=1	--	--	--	--	--	--	--	--	KOG0255	Synaptic vesicle transporter SVOP and related transporters (major facilitator superfamily)
c100028_g1	SC	1.00	6.17	211	--	--	--	--	--	--	--	--	--	--	--	--	--	--	--	--	--	--	--	--	--	--	--	--	--	--	--	--
c100029_g1	SC	1.00	7.19	207	--	--	--	--	--	--	--	--	--	--	--	--	--	--	--	--	--	--	PF07503	HypF finger	--	--	GO:0008270	zinc ion binding	--	--	--	--
c10002_g1	SC	8.00	1.45	611	--	--	--	--	--	--	--	--	--	--	--	--	--	--	--	--	--	--	--	--	--	--	--	--	--	--	--	--
c10002_g2	SC	20.00	2.57	770	--	--	--	--	--	--	--	--	--	--	--	--	--	--	--	--	--	--	--	--	--	--	--	--	--	--	--	--
c100031_g1	SC	1.00	2.98	234	390358127	XP_001197036.2	170	9.8971e-13	PREDICTED: alpha-1A adrenergic receptor-like [Strongylocentrotus purpuratus]	--	--	--	--	--	--	--	--	--	--	--	--	--	PF00001	7 transmembrane receptor (rhodopsin family)	GO:0007186	G-protein coupled receptor signaling pathway	GO:0004930	G-protein coupled receptor activity	GO:0016021	integral component of membrane	--	--
c100032_g1	SC	1.00	8.82	202	--	--	--	--	--	--	--	--	--	--	--	--	--	--	--	--	--	--	--	--	--	--	--	--	--	--	--	--
c100033_g1	SC	1.00	8.82	202	--	--	--	--	--	--	--	--	--	--	--	--	--	--	--	--	--	--	--	--	--	--	--	--	--	--	--	--
c100034_g1	SC	2.00	9.02	220	--	--	--	--	--	--	--	--	--	--	--	--	--	--	--	--	--	--	--	--	--	--	--	--	--	--	--	--
c100036_g1	SC	8.00	3.98	364	--	--	--	--	--	--	--	--	--	--	--	--	--	--	--	--	--	--	--	--	--	--	--	--	--	--	--	--
c100037_g1	SC	3.00	1.40	373	--	--	--	--	--	--	--	--	--	--	--	--	--	--	--	--	--	--	PF01561	Hantavirus glycoprotein G2	GO:0030683	evasion or tolerance by virus of host immune response	--	--	GO:0019012	virion	--	--
c100038_g1	SC	1.00	2.90	235	--	--	--	--	--	--	--	--	--	--	--	--	--	--	--	--	--	--	--	--	--	--	--	--	--	--	--	--
c10003_g1	SC	4.00	2.38	341	--	--	--	--	--	--	--	--	--	--	--	--	--	--	--	--	--	--	--	--	--	--	--	--	--	--	--	--
c100040_g1	SC	1.00	4.37	221	--	--	--	--	--	--	--	--	--	--	--	--	--	--	--	--	--	--	--	--	--	--	--	--	--	--	--	--
c100041_g1	SC	2.00	1.19	341	--	--	--	--	--	--	--	--	--	--	--	--	--	--	--	--	--	--	--	--	--	--	--	--	--	--	--	--
c100042_g1	SC	4.00	2.52	334	--	--	--	--	--	--	--	--	--	--	--	--	--	--	--	--	--	--	--	--	--	--	--	--	--	--	--	--
c100043_g1	SC	3.00	23.36	205	--	--	--	--	--	--	--	--	--	--	--	--	--	--	--	--	--	--	--	--	--	--	--	--	--	--	--	--
c100045_g1	SC	1.00	4.10	223	--	--	--	--	--	--	--	--	--	--	--	--	--	--	--	--	--	--	--	--	--	--	--	--	--	--	--	--
c100046_g1	SC	6.00	44.88	206	--	--	--	--	--	--	--	--	--	--	--	--	--	--	--	--	--	--	--	--	--	--	--	--	--	--	--	--
c100047_g1	SC	1.00	1.86	254	--	--	--	--	--	--	--	--	--	--	--	--	--	--	--	--	--	--	--	--	--	--	--	--	--	--	--	--
c100048_g1	SC	1.00	0.77	313	--	--	--	--	--	--	--	--	--	--	--	--	--	--	--	--	--	--	--	--	--	--	--	--	--	--	--	--
c100049_g1	SC	2.00	7.05	228	780168305	XP_003728081.2	188	3.18446e-15	PREDICTED: uncharacterized protein LOC100888560 [Strongylocentrotus purpuratus]	--	--	--	--	--	--	--	--	--	--	--	--	--	--	--	--	--	--	--	--	--	--	--
c10004_g1	SC	41.00	2.28	1485	--	--	--	--	--	--	--	--	--	--	--	--	--	--	--	--	--	--	--	--	--	--	--	--	--	--	--	--
c100050_g1	SC	1.00	3.42	229	--	--	--	--	--	--	--	--	--	--	--	--	--	--	--	--	--	--	--	--	--	--	--	--	--	--	--	--
c100051_g1	SC	5.00	1.55	450	--	--	--	--	--	--	--	--	--	--	--	--	--	--	--	--	--	--	--	--	--	--	--	--	--	--	--	--
c100052_g1	SC	1.00	8.45	203	--	--	--	--	--	--	--	--	--	--	--	--	--	--	--	--	--	--	--	--	--	--	--	--	--	--	--	--
c100053_g1	SC	1.00	4.23	222	--	--	--	--	--	--	--	--	--	--	--	--	--	--	--	--	--	--	--	--	--	--	--	--	--	--	--	--
c100055_g1	SC	1.00	2.49	241	--	--	--	--	--	--	--	--	--	--	--	--	--	--	--	--	--	--	--	--	--	--	--	--	--	--	--	--
c100056_g1	SC	2.00	6.47	231	--	--	--	--	--	--	--	--	--	--	--	--	--	--	--	--	--	--	--	--	--	--	--	--	--	--	--	--
c100057_g1	SC	2.00	9.97	217	--	--	--	--	--	--	--	--	--	--	--	--	--	--	--	--	--	--	--	--	--	--	--	--	--	--	--	--
c100058_g1	SC	1.00	6.65	209	--	--	--	--	--	--	--	--	--	--	--	--	--	--	--	--	--	--	--	--	--	--	--	--	--	--	--	--
c100059_g1	SC	1.00	0.93	297	--	--	--	--	--	--	--	--	--	--	--	--	--	--	--	--	--	--	--	--	--	--	--	--	--	--	--	--
c10005_g1	SC	6.00	12.69	248	--	--	--	--	--	--	--	--	--	--	--	--	--	--	--	--	--	--	--	--	--	--	--	--	--	--	--	--
c100060_g1	SC	2.00	3.80	253	--	--	--	--	--	--	--	--	--	--	--	--	--	--	--	--	--	--	--	--	--	--	--	--	--	--	--	--
c100062_g1	SC	2.00	2.18	285	--	--	--	--	--	--	--	--	--	--	--	--	--	--	--	--	--	--	--	--	--	--	--	--	--	--	--	--
c100064_g1	SC	1.00	1.62	261	807037408	XP_012160164.1	125	1.85241e-06	PREDICTED: P2Y purinoceptor 4 [Ceratitis capitata]>gi|807037410|ref|XP_012160165.1| PREDICTED: P2Y purinoceptor 4 [Ceratitis capitata]	--	--	--	--	--	--	--	--	--	Q93127	109	7.35876e-06	Probable G-protein coupled receptor No18 OS=Amphibalanus amphitrite PE=3 SV=1	PF00001	7 transmembrane receptor (rhodopsin family)	GO:0007186	G-protein coupled receptor signaling pathway	GO:0004930	G-protein coupled receptor activity	GO:0016021	integral component of membrane	KOG3656	FOG: 7 transmembrane receptor
c100065_g1	SC	2.00	4.75	243	--	--	--	--	--	--	--	--	--	--	--	--	--	--	--	--	--	--	--	--	--	--	--	--	--	--	--	--
c100067_g1	SC	2.00	6.66	230	--	--	--	--	--	--	--	--	--	--	--	--	--	--	--	--	--	--	PF03607//PF02931	Doublecortin//Neurotransmitter-gated ion-channel ligand binding domain	GO:0006810//GO:0035556//GO:0006811	transport//intracellular signal transduction//ion transport	GO:0005230	extracellular ligand-gated ion channel activity	GO:0016020	membrane	--	--
c100068_g1	SC	8.00	11.22	269	--	--	--	--	--	--	--	--	--	--	--	--	--	--	--	--	--	--	--	--	--	--	--	--	--	--	--	--
c100069_g1	SC	2.00	1.60	310	--	--	--	--	--	--	--	--	--	--	--	--	--	--	--	--	--	--	--	--	--	--	--	--	--	--	--	--
c10006_g1	SC	2.00	9.97	217	--	--	--	--	--	--	--	--	--	--	--	--	--	--	--	--	--	--	--	--	--	--	--	--	--	--	--	--
c10006_g2	SC	13.00	1.82	725	--	--	--	--	--	--	--	--	--	--	--	--	--	--	--	--	--	--	--	--	--	--	--	--	--	--	--	--
c100070_g1	SC	5.00	2.41	369	780001143	XP_003724382.2	168	1.13994e-11	PREDICTED: uncharacterized protein LOC100890318 [Strongylocentrotus purpuratus]	--	--	--	--	--	--	--	--	--	--	--	--	--	--	--	--	--	--	--	--	--	--	--
c100071_g1	SC	1.00	1.53	264	688606428	XP_009293886.1	251	5.6503e-23	PREDICTED: uncharacterized protein LOC103909478 [Danio rerio]	--	--	--	--	--	--	--	--	--	--	--	--	--	--	--	--	--	--	--	--	--	--	--
c100072_g1	SC	4.00	2.18	352	668583121	AIH07018.1	207	2.92607e-18	tenascin [Apostichopus japonicus]	--	--	--	--	--	K06252	TN	tenascin	http://www.genome.jp/dbget-bin/www_bget?ko:K06252	Q29042	159	2.29509e-12	Ficolin-1 OS=Sus scrofa GN=FCN1 PE=1 SV=1	PF02481	DNA recombination-mediator protein A	GO:0009294	DNA mediated transformation	--	--	--	--	--	--
c100073_g1	SC	1.00	3.63	227	--	--	--	--	--	--	--	--	--	--	--	--	--	--	--	--	--	--	--	--	--	--	--	--	--	--	--	--
c100074_g1	SC	9.00	4.16	375	--	--	--	--	--	--	--	--	--	--	--	--	--	--	--	--	--	--	--	--	--	--	--	--	--	--	--	--
c100075_g1	SC	8.00	4.45	349	780082494	XP_011672975.1	239	1.21312e-21	PREDICTED: F-box only protein 31 [Strongylocentrotus purpuratus]	--	--	--	--	--	K10308	FBXO31	F-box protein 31	http://www.genome.jp/dbget-bin/www_bget?ko:K10308	A2BD94	171	1.5034e-13	F-box only protein 31-B OS=Xenopus laevis GN=fbxo31-b PE=2 SV=1	PF00646//PF15966//PF12937	F-box domain//F-box//F-box-like	--	--	GO:0005515	protein binding	--	--	--	--
c100076_g1	SC	1.00	4.10	223	--	--	--	--	--	--	--	--	--	--	--	--	--	--	--	--	--	--	--	--	--	--	--	--	--	--	--	--
c100079_g1	SC	2.00	6.85	229	--	--	--	--	--	--	--	--	--	--	--	--	--	--	--	--	--	--	--	--	--	--	--	--	--	--	--	--
c10007_g1	SC	2.00	2.12	287	390364268	XP_787951.3	138	4.89601e-08	PREDICTED: general transcription factor 3C polypeptide 3 isoform X1 [Strongylocentrotus purpuratus]	--	--	--	--	--	--	--	--	--	--	--	--	--	--	--	--	--	--	--	--	--	--	--
c100080_g1	SC	4.00	9.73	242	--	--	--	--	--	--	--	--	--	--	--	--	--	--	--	--	--	--	PF09198	Bacteriophage T4 beta-glucosyltransferase	GO:0006304	DNA modification	GO:0033821	DNA beta-glucosyltransferase activity	--	--	--	--
c100081_g1	SC	11.00	2.64	516	--	--	--	--	--	--	--	--	--	--	--	--	--	--	--	--	--	--	--	--	--	--	--	--	--	--	--	--
c100082_g1	SC	1.00	5.73	213	--	--	--	--	--	--	--	--	--	--	--	--	--	--	--	--	--	--	--	--	--	--	--	--	--	--	--	--
c100083_g1	SC	2.00	2.96	266	--	--	--	--	--	--	--	--	--	--	--	--	--	--	--	--	--	--	--	--	--	--	--	--	--	--	--	--
c100084_g1	SC	4.00	2.05	360	632963702	XP_007898034.1	517	1.51455e-61	PREDICTED: diphthamide biosynthesis protein 2 isoform X2 [Callorhinchus milii]	--	--	--	--	--	K17866	DPH2	diphthamide biosynthesis protein 2	http://www.genome.jp/dbget-bin/www_bget?ko:K17866	Q5ZKI2	471	1.2998e-55	Diphthamide biosynthesis protein 2 OS=Gallus gallus GN=DPH2 PE=2 SV=1	--	--	--	--	--	--	--	--	KOG2648	Diphthamide biosynthesis protein
c100086_g1	SC	3.00	5.94	251	--	--	--	--	--	--	--	--	--	--	--	--	--	--	--	--	--	--	--	--	--	--	--	--	--	--	--	--
c100087_g1	SC	2.00	2.67	272	--	--	--	--	--	--	--	--	--	--	--	--	--	--	--	--	--	--	--	--	--	--	--	--	--	--	--	--
c100088_g1	SC	1.00	8.11	204	--	--	--	--	--	--	--	--	--	--	--	--	--	--	--	--	--	--	--	--	--	--	--	--	--	--	--	--
c10008_g1	SC	10.00	3.11	449	--	--	--	--	--	--	--	--	--	--	--	--	--	--	--	--	--	--	--	--	--	--	--	--	--	--	--	--
c100090_g1	SC	1.00	5.73	213	--	--	--	--	--	--	--	--	--	--	--	--	--	--	--	--	--	--	--	--	--	--	--	--	--	--	--	--
c100092_g1	SC	4.00	2.14	354	--	--	--	--	--	--	--	--	--	--	--	--	--	--	--	--	--	--	--	--	--	--	--	--	--	--	--	--
c100094_g1	SC	9.00	2.82	447	--	--	--	--	--	--	--	--	--	--	--	--	--	--	--	--	--	--	--	--	--	--	--	--	--	--	--	--
c100095_g1	SC	3.00	4.43	266	--	--	--	--	--	--	--	--	--	--	--	--	--	--	--	--	--	--	--	--	--	--	--	--	--	--	--	--
c100096_g1	SC	1.00	1.31	273	--	--	--	--	--	--	--	--	--	--	--	--	--	--	--	--	--	--	--	--	--	--	--	--	--	--	--	--
c100097_g1	SC	1.00	0.77	313	--	--	--	--	--	--	--	--	--	--	--	--	--	--	--	--	--	--	--	--	--	--	--	--	--	--	--	--
c100098_g1	SC	2.00	3.30	260	573876991	XP_006626754.1	136	2.61986e-08	PREDICTED: tubulin polyglutamylase complex subunit 2-like [Lepisosteus oculatus]	--	--	--	--	--	--	--	--	--	Q68CL5	116	7.35849e-07	Tubulin polyglutamylase complex subunit 2 OS=Homo sapiens GN=TPGS2 PE=2 SV=2	--	--	--	--	--	--	--	--	--	--
c100099_g1	SC	3.00	6.49	247	--	--	--	--	--	--	--	--	--	--	--	--	--	--	--	--	--	--	--	--	--	--	--	--	--	--	--	--
c10009_g1	SC	3.00	1.13	409	--	--	--	--	--	--	--	--	--	--	--	--	--	--	--	--	--	--	--	--	--	--	--	--	--	--	--	--
c1000_g1	SC	234.00	7.48	2423	--	--	--	--	--	--	--	--	--	--	--	--	--	--	--	--	--	--	--	--	--	--	--	--	--	--	--	--
c100100_g1	SC	1.00	1.79	256	--	--	--	--	--	--	--	--	--	--	--	--	--	--	--	--	--	--	--	--	--	--	--	--	--	--	--	--
c100101_g1	SC	4.00	2.42	339	524897641	XP_005105280.1	188	2.17784e-14	PREDICTED: transmembrane protein 8A-like [Aplysia californica]>gi|524897643|ref|XP_005105281.1| PREDICTED: transmembrane protein 8A-like [Aplysia californica]	--	--	--	--	--	--	--	--	--	Q9ESN3	128	6.8475e-08	Transmembrane protein 8A OS=Mus musculus GN=Tmem8a PE=2 SV=1	--	--	--	--	--	--	--	--	--	--
c100102_g1	SC	1.00	6.40	210	--	--	--	--	--	--	--	--	--	--	--	--	--	--	--	--	--	--	--	--	--	--	--	--	--	--	--	--
c100103_g1	SC	2.00	3.80	253	--	--	--	--	--	--	--	--	--	--	--	--	--	--	--	--	--	--	--	--	--	--	--	--	--	--	--	--
c100104_g1	SC	1.00	0.88	302	--	--	--	--	--	--	--	--	--	--	--	--	--	--	--	--	--	--	--	--	--	--	--	--	--	--	--	--
c100105_g1	SC	1.00	3.24	231	--	--	--	--	--	--	--	--	--	--	--	--	--	--	--	--	--	--	--	--	--	--	--	--	--	--	--	--
c100106_g1	SC	1.00	2.12	248	--	--	--	--	--	--	--	--	--	--	--	--	--	--	--	--	--	--	--	--	--	--	--	--	--	--	--	--
c100107_g1	SC	5.00	3.24	331	780034575	XP_011667201.1	173	1.04731e-12	PREDICTED: RNA-directed DNA polymerase from mobile element jockey-like [Strongylocentrotus purpuratus]	--	--	--	--	--	--	--	--	--	--	--	--	--	--	--	--	--	--	--	--	--	--	--
c100109_g1	SC	3.00	27.61	201	--	--	--	--	--	--	--	--	--	--	--	--	--	--	--	--	--	--	--	--	--	--	--	--	--	--	--	--
c10010_g1	SC	2.00	5.37	238	--	--	--	--	--	--	--	--	--	--	--	--	--	--	--	--	--	--	--	--	--	--	--	--	--	--	--	--
c100110_g1	SC	4.00	6.60	260	--	--	--	--	--	--	--	--	--	--	--	--	--	--	--	--	--	--	--	--	--	--	--	--	--	--	--	--
c100111_g1	SC	2.00	6.29	232	780022852	XP_011665394.1	264	4.78425e-25	PREDICTED: probable 3',5'-cyclic phosphodiesterase pde-5 [Strongylocentrotus purpuratus]	--	--	--	--	--	K18438	PDE10	cAMP and cAMP-inhibited cGMP 3',5'-cyclic phosphodiesterase 10	http://www.genome.jp/dbget-bin/www_bget?ko:K18438	P91119	214	8.16575e-20	Probable 3',5'-cyclic phosphodiesterase pde-5 OS=Caenorhabditis elegans GN=pde-5 PE=3 SV=3	PF13492	GAF domain	--	--	GO:0005515	protein binding	--	--	--	--
c100112_g1	SC	1.00	4.82	218	--	--	--	--	--	--	--	--	--	--	--	--	--	--	--	--	--	--	--	--	--	--	--	--	--	--	--	--
c100113_g1	SC	2.00	2.46	277	--	--	--	--	--	--	--	--	--	--	--	--	--	--	--	--	--	--	--	--	--	--	--	--	--	--	--	--
c100114_g1	SC	2.00	4.86	242	--	--	--	--	--	--	--	--	--	--	--	--	--	--	--	--	--	--	--	--	--	--	--	--	--	--	--	--
c100115_g1	SC	1.00	3.97	224	--	--	--	--	--	--	--	--	--	--	--	--	--	--	--	--	--	--	--	--	--	--	--	--	--	--	--	--
c100116_g1	SC	5.00	4.00	310	780012247	XP_011663929.1	422	1.2093e-45	PREDICTED: uncharacterized protein LOC589178 isoform X2 [Strongylocentrotus purpuratus]	8393928	NM_017229.1	53	4.37951e-17	Rattus norvegicus phosphodiesterase 3B, cGMP-inhibited (Pde3b), mRNA >gnl|BL_ORD_ID|837715 R.norvegicus adipocyte hormone-sensitive cyclic AMP phosphodiesterase mRNA, complete CDS	K13296	PDE3B	cGMP-inhibited 3',5'-cyclic phosphodiesterase B	http://www.genome.jp/dbget-bin/www_bget?ko:K13296	Q63085	276	1.54356e-27	cGMP-inhibited 3',5'-cyclic phosphodiesterase B OS=Rattus norvegicus GN=Pde3b PE=2 SV=1	PF00233	3'5'-cyclic nucleotide phosphodiesterase	GO:0007165//GO:0006144	signal transduction//purine nucleobase metabolic process	GO:0004114	3',5'-cyclic-nucleotide phosphodiesterase activity	--	--	KOG3688	Cyclic GMP phosphodiesterase
c100117_g1	SC	5.00	6.90	270	--	--	--	--	--	--	--	--	--	--	--	--	--	--	--	--	--	--	--	--	--	--	--	--	--	--	--	--
c100118_g1	SC	6.00	3.19	355	542214958	XP_003438726.2	279	2.79211e-28	PREDICTED: phosphatidylethanolamine N-methyltransferase-like [Oreochromis niloticus]	156845951	XM_001645815.1	49	8.51902e-15	Vanderwaltozyma polyspora DSM 70294 hypothetical protein (Kpol_1054p55) partial mRNA	K00551	PEMT	phosphatidylethanolamine N-methyltransferase	http://www.genome.jp/dbget-bin/www_bget?ko:K00551	P05375	254	3.32039e-26	Phosphatidyl-N-methylethanolamine N-methyltransferase OS=Saccharomyces cerevisiae (strain ATCC 204508 / S288c) GN=OPI3 PE=1 SV=1	PF04140	Isoprenylcysteine carboxyl methyltransferase (ICMT) family	GO:0006479//GO:0006481	protein methylation//C-terminal protein methylation	GO:0004671	protein C-terminal S-isoprenylcysteine carboxyl O-methyltransferase activity	GO:0016021	integral component of membrane	KOG4142	Phospholipid methyltransferase
c100119_g1	SC	4.00	2.79	323	--	--	--	--	--	--	--	--	--	--	--	--	--	--	--	--	--	--	--	--	--	--	--	--	--	--	--	--
c100121_g1	SC	1.00	3.53	228	--	--	--	--	--	--	--	--	--	--	--	--	--	--	--	--	--	--	--	--	--	--	--	--	--	--	--	--
c100122_g1	SC	1.00	8.82	202	--	--	--	--	--	--	--	--	--	--	--	--	--	--	--	--	--	--	PF08653	DASH complex subunit Dam1	GO:0008608	attachment of spindle microtubules to kinetochore	--	--	GO:0042729//GO:0072686	DASH complex//mitotic spindle	--	--
c100123_g1	SC	12.00	2.09	626	--	--	--	--	--	--	--	--	--	--	--	--	--	--	--	--	--	--	--	--	--	--	--	--	--	--	--	--
c100124_g1	SC	3.00	1.94	331	--	--	--	--	--	--	--	--	--	--	--	--	--	--	--	--	--	--	--	--	--	--	--	--	--	--	--	--
c100125_g1	SC	2.00	9.97	217	--	--	--	--	--	--	--	--	--	--	--	--	--	--	--	--	--	--	--	--	--	--	--	--	--	--	--	--
c100126_g1	SC	2.00	5.65	236	--	--	--	--	--	--	--	--	--	--	--	--	--	--	--	--	--	--	--	--	--	--	--	--	--	--	--	--
c100128_g1	SC	4.00	5.61	269	--	--	--	--	--	--	--	--	--	--	--	--	--	--	--	--	--	--	--	--	--	--	--	--	--	--	--	--
c100129_g1	SC	2.00	1.91	295	--	--	--	--	--	--	--	--	--	--	--	--	--	--	--	--	--	--	--	--	--	--	--	--	--	--	--	--
c10012_g1	SC	49.00	2.21	1781	780094564	XP_011674477.1	177	8.09605e-11	PREDICTED: mucin-5AC [Strongylocentrotus purpuratus]	--	--	--	--	--	--	--	--	--	Q8SQA4	138	1.94657e-07	CD97 antigen OS=Bos taurus GN=CD97 PE=2 SV=1	PF00008//PF07645	EGF-like domain//Calcium-binding EGF domain	--	--	GO:0005515//GO:0005509	protein binding//calcium ion binding	--	--	KOG1217	Fibrillins and related proteins containing Ca2+-binding EGF-like domains
c100130_g1	SC	10.00	4.02	398	--	--	--	--	--	--	--	--	--	--	--	--	--	--	--	--	--	--	--	--	--	--	--	--	--	--	--	--
c100131_g1	SC	1.00	2.21	246	291223223	XP_002731612.1	183	4.37053e-15	PREDICTED: malignant fibrous histiocytoma-amplified sequence 1 homolog [Saccoglossus kowalevskii]	--	--	--	--	--	--	--	--	--	--	--	--	--	PF00560//PF13855	Leucine Rich Repeat//Leucine rich repeat	--	--	GO:0005515	protein binding	--	--	KOG0619	FOG: Leucine rich repeat
c100132_g1	SC	3.00	10.58	228	--	--	--	--	--	--	--	--	--	--	--	--	--	--	--	--	--	--	--	--	--	--	--	--	--	--	--	--
c100134_g1	SC	1.00	3.97	224	--	--	--	--	--	--	--	--	--	--	--	--	--	--	--	--	--	--	--	--	--	--	--	--	--	--	--	--
c100135_g1	SC	4.00	1.66	392	--	--	--	--	--	--	--	--	--	--	--	--	--	--	--	--	--	--	PF04923	Ninjurin	GO:0007155//GO:0042246	cell adhesion//tissue regeneration	--	--	GO:0016021	integral component of membrane	--	--
c100136_g1	SC	1.00	1.21	278	--	--	--	--	--	--	--	--	--	--	--	--	--	--	--	--	--	--	--	--	--	--	--	--	--	--	--	--
c100137_g1	SC	1.00	3.42	229	--	--	--	--	--	--	--	--	--	--	--	--	--	--	--	--	--	--	--	--	--	--	--	--	--	--	--	--
c100138_g1	SC	1.00	1.82	255	--	--	--	--	--	--	--	--	--	--	--	--	--	--	--	--	--	--	--	--	--	--	--	--	--	--	--	--
c100139_g1	SC	6.00	3.14	357	--	--	--	--	--	--	--	--	--	--	--	--	--	--	--	--	--	--	--	--	--	--	--	--	--	--	--	--
c10013_g1	SC	268.00	4.97	4016	162415191	ABX89143.1	766	3.00925e-90	forkhead B [Patiria miniata]	47551224	NM_214632.1	130	9.87088e-59	Strongylocentrotus purpuratus winged helix transcription factor Forkhead-1 (fkh1), mRNA >gnl|BL_ORD_ID|321689 Strongylocentrotus purpuratus winged helix transcription factor Forkhead-1 (fkh1) mRNA, complete cds	K09395	FOXB	forkhead box protein B	http://www.genome.jp/dbget-bin/www_bget?ko:K09395	O93529	589	8.68158e-66	Forkhead box protein B1 OS=Xenopus laevis GN=foxb1 PE=2 SV=1	PF00250//PF04613//PF09416	Forkhead domain//UDP-3-O-[3-hydroxymyristoyl] glucosamine N-acyltransferase, LpxD//RNA helicase (UPF2 interacting domain)	GO:0009245//GO:0006355//GO:0000184	lipid A biosynthetic process//regulation of transcription, DNA-templated//nuclear-transcribed mRNA catabolic process, nonsense-mediated decay	GO:0004386//GO:0005524//GO:0016747//GO:0043565//GO:0003700//GO:0008270//GO:0003677	helicase activity//ATP binding//transferase activity, transferring acyl groups other than amino-acyl groups//sequence-specific DNA binding//transcription factor activity, sequence-specific DNA binding//zinc ion binding//DNA binding	GO:0005667//GO:0005737	transcription factor complex//cytoplasm	KOG3562	Forkhead/HNF-3-related transcription factor
c100141_g1	SC	1.00	5.34	215	--	--	--	--	--	--	--	--	--	--	--	--	--	--	--	--	--	--	--	--	--	--	--	--	--	--	--	--
c100142_g1	SC	5.00	3.18	333	--	--	--	--	--	--	--	--	--	--	--	--	--	--	--	--	--	--	--	--	--	--	--	--	--	--	--	--
c100143_g1	SC	1.00	2.37	243	--	--	--	--	--	--	--	--	--	--	--	--	--	--	--	--	--	--	--	--	--	--	--	--	--	--	--	--
c100144_g1	SC	2.00	7.48	226	524883913	XP_005098582.1	130	3.18811e-07	PREDICTED: myosin-9-like isoform X1 [Aplysia californica]	--	--	--	--	--	--	--	--	--	--	--	--	--	PF12474	Polo kinase kinase	GO:0009069//GO:0016310	serine family amino acid metabolic process//phosphorylation	GO:0004674	protein serine/threonine kinase activity	--	--	--	--
c100145_g1	SC	3.00	2.66	301	--	--	--	--	--	--	--	--	--	--	--	--	--	--	--	--	--	--	--	--	--	--	--	--	--	--	--	--
c100146_g1	SC	5.00	3.18	333	390360510	XP_785341.2	444	8.80322e-50	PREDICTED: ectonucleoside triphosphate diphosphohydrolase 4 isoform X2 [Strongylocentrotus purpuratus]	--	--	--	--	--	K12305	ENTPD4, LALP70	ectonucleoside triphosphate diphosphohydrolase 4	http://www.genome.jp/dbget-bin/www_bget?ko:K12305	Q9NQZ7	250	2.65356e-24	Ectonucleoside triphosphate diphosphohydrolase 7 OS=Homo sapiens GN=ENTPD7 PE=2 SV=1	PF01150	GDA1/CD39 (nucleoside phosphatase) family	--	--	GO:0016787	hydrolase activity	--	--	--	--
c100147_g1	SC	2.00	5.24	239	--	--	--	--	--	--	--	--	--	--	--	--	--	--	--	--	--	--	--	--	--	--	--	--	--	--	--	--
c100148_g1	SC	1.00	1.38	270	--	--	--	--	--	--	--	--	--	--	--	--	--	--	--	--	--	--	--	--	--	--	--	--	--	--	--	--
c100149_g1	SC	1.00	7.48	206	--	--	--	--	--	--	--	--	--	--	--	--	--	--	--	--	--	--	--	--	--	--	--	--	--	--	--	--
c10014_g1	SC	28.00	2.36	1057	--	--	--	--	--	--	--	--	--	--	--	--	--	--	--	--	--	--	--	--	--	--	--	--	--	--	--	--
c100150_g1	SC	4.00	1.54	405	--	--	--	--	--	--	--	--	--	--	--	--	--	--	--	--	--	--	--	--	--	--	--	--	--	--	--	--
c100151_g1	SC	2.00	8.46	222	--	--	--	--	--	--	--	--	--	--	--	--	--	--	--	--	--	--	--	--	--	--	--	--	--	--	--	--
c100152_g1	SC	5.00	1.64	437	--	--	--	--	--	--	--	--	--	--	--	--	--	--	--	--	--	--	--	--	--	--	--	--	--	--	--	--
c100153_g1	SC	1.00	3.15	232	--	--	--	--	--	--	--	--	--	--	--	--	--	--	--	--	--	--	--	--	--	--	--	--	--	--	--	--
c100154_g1	SC	1.00	3.85	225	--	--	--	--	--	--	--	--	--	--	--	--	--	--	--	--	--	--	--	--	--	--	--	--	--	--	--	--
c100155_g1	SC	5.00	2.30	376	--	--	--	--	--	--	--	--	--	--	--	--	--	--	--	--	--	--	--	--	--	--	--	--	--	--	--	--
c100156_g1	SC	5.00	1.16	527	--	--	--	--	--	--	--	--	--	--	--	--	--	--	--	--	--	--	--	--	--	--	--	--	--	--	--	--
c100157_g1	SC	1.00	6.91	208	--	--	--	--	--	--	--	--	--	--	--	--	--	--	--	--	--	--	--	--	--	--	--	--	--	--	--	--
c100158_g1	SC	1.00	6.17	211	--	--	--	--	--	--	--	--	--	--	--	--	--	--	--	--	--	--	--	--	--	--	--	--	--	--	--	--
c100159_g1	SC	3.00	6.95	244	--	--	--	--	--	--	--	--	--	--	--	--	--	--	--	--	--	--	--	--	--	--	--	--	--	--	--	--
c10015_g1	SC	10.00	2.58	496	--	--	--	--	--	--	--	--	--	--	--	--	--	--	--	--	--	--	--	--	--	--	--	--	--	--	--	--
c100160_g1	SC	5.00	4.33	303	--	--	--	--	--	--	--	--	--	--	--	--	--	--	--	--	--	--	--	--	--	--	--	--	--	--	--	--
c100161_g1	SC	3.00	1.86	336	--	--	--	--	--	--	--	--	--	--	--	--	--	--	--	--	--	--	--	--	--	--	--	--	--	--	--	--
c100163_g1	SC	2.00	5.96	234	--	--	--	--	--	--	--	--	--	--	--	--	--	--	--	--	--	--	--	--	--	--	--	--	--	--	--	--
c100164_g1	SC	1.00	6.65	209	--	--	--	--	--	--	--	--	--	--	--	--	--	--	--	--	--	--	--	--	--	--	--	--	--	--	--	--
c100165_g1	SC	4.00	4.25	287	--	--	--	--	--	--	--	--	--	--	--	--	--	--	--	--	--	--	--	--	--	--	--	--	--	--	--	--
c100166_g1	SC	1.00	7.48	206	--	--	--	--	--	--	--	--	--	--	--	--	--	--	--	--	--	--	--	--	--	--	--	--	--	--	--	--
c100167_g1	SC	1.00	4.37	221	--	--	--	--	--	--	--	--	--	--	--	--	--	--	--	--	--	--	--	--	--	--	--	--	--	--	--	--
c100168_g1	SC	6.00	15.32	240	780085524	XP_011673364.1	176	2.90474e-13	PREDICTED: kinesin-like protein KIF6 [Strongylocentrotus purpuratus]	--	--	--	--	--	K10397	KIF6_9	kinesin family member 6/9	http://www.genome.jp/dbget-bin/www_bget?ko:K10397	Q6ZMV9	129	2.12189e-08	Kinesin-like protein KIF6 OS=Homo sapiens GN=KIF6 PE=1 SV=3	PF10232//PF12763//PF03920	Mediator of RNA polymerase II transcription complex subunit 8//Cytoskeletal-regulatory complex EF hand//Groucho/TLE N-terminal Q-rich domain	GO:0006357	regulation of transcription from RNA polymerase II promoter	GO:0001104//GO:0005515	RNA polymerase II transcription cofactor activity//protein binding	GO:0016592	mediator complex	--	--
c10016_g1	SC	13.00	3.15	513	--	--	--	--	--	--	--	--	--	--	--	--	--	--	--	--	--	--	--	--	--	--	--	--	--	--	--	--
c100170_g1	SC	1.00	8.11	204	--	--	--	--	--	--	--	--	--	--	--	--	--	--	--	--	--	--	--	--	--	--	--	--	--	--	--	--
c100171_g1	SC	14.00	3.17	534	--	--	--	--	--	--	--	--	--	--	--	--	--	--	--	--	--	--	--	--	--	--	--	--	--	--	--	--
c100172_g1	SC	1.00	3.97	224	156402714	XP_001639735.1	314	2.70117e-33	predicted protein [Nematostella vectensis]>gi|156226865|gb|EDO47672.1| predicted protein, partial [Nematostella vectensis]	847108635	XM_012958604.1	33	3.98403e-06	PREDICTED: Xenopus (Silurana) tropicalis sirtuin (silent mating type information regulation 2 homolog) 3, gene 2 (sirt3.2), transcript variant X2, mRNA	K11413	SIRT3, SIR2L3	NAD-dependent deacetylase sirtuin 3	http://www.genome.jp/dbget-bin/www_bget?ko:K11413	Q9NTG7	275	5.24705e-29	NAD-dependent protein deacetylase sirtuin-3, mitochondrial OS=Homo sapiens GN=SIRT3 PE=1 SV=2	PF02146	Sir2 family	GO:0006476//GO:0006807	protein deacetylation//nitrogen compound metabolic process	GO:0008270//GO:0070403//GO:0016811	zinc ion binding//NAD+ binding//hydrolase activity, acting on carbon-nitrogen (but not peptide) bonds, in linear amides	--	--	KOG2682	NAD-dependent histone deacetylases and class I sirtuins (SIR2 family)
c100173_g1	SC	6.00	4.11	325	--	--	--	--	--	--	--	--	--	--	--	--	--	--	--	--	--	--	--	--	--	--	--	--	--	--	--	--
c100174_g1	SC	3.00	2.00	328	--	--	--	--	--	--	--	--	--	--	--	--	--	--	--	--	--	--	--	--	--	--	--	--	--	--	--	--
c100176_g1	SC	2.00	7.05	228	--	--	--	--	--	--	--	--	--	--	--	--	--	--	--	--	--	--	--	--	--	--	--	--	--	--	--	--
c100177_g1	SC	2.00	1.93	294	--	--	--	--	--	--	--	--	--	--	--	--	--	--	--	--	--	--	--	--	--	--	--	--	--	--	--	--
c100178_g1	SC	5.00	2.72	352	--	--	--	--	--	--	--	--	--	--	--	--	--	--	--	--	--	--	--	--	--	--	--	--	--	--	--	--
c100179_g1	SC	3.00	2.90	294	--	--	--	--	--	--	--	--	--	--	--	--	--	--	--	--	--	--	--	--	--	--	--	--	--	--	--	--
c10017_g1	SC	10.00	2.06	564	--	--	--	--	--	--	--	--	--	--	--	--	--	--	--	--	--	--	--	--	--	--	--	--	--	--	--	--
c100180_g1	SC	1.00	4.10	223	--	--	--	--	--	--	--	--	--	--	--	--	--	--	--	--	--	--	--	--	--	--	--	--	--	--	--	--
c100181_g1	SC	5.00	2.74	351	--	--	--	--	--	--	--	--	--	--	--	--	--	--	--	--	--	--	--	--	--	--	--	--	--	--	--	--
c100183_g1	SC	7.00	1.97	473	524902897	XP_005107669.1	165	6.8709e-11	PREDICTED: uncharacterized protein LOC101861687 isoform X5 [Aplysia californica]	--	--	--	--	--	--	--	--	--	--	--	--	--	--	--	--	--	--	--	--	--	--	--
c100184_g1	SC	1.00	2.43	242	--	--	--	--	--	--	--	--	--	--	--	--	--	--	--	--	--	--	--	--	--	--	--	--	--	--	--	--
c100185_g1	SC	1.00	2.98	234	--	--	--	--	--	--	--	--	--	--	--	--	--	--	--	--	--	--	--	--	--	--	--	--	--	--	--	--
c100186_g1	SC	3.00	6.64	246	--	--	--	--	--	--	--	--	--	--	--	--	--	--	--	--	--	--	--	--	--	--	--	--	--	--	--	--
c100187_g1	SC	2.00	12.81	210	--	--	--	--	--	--	--	--	--	--	--	--	--	--	--	--	--	--	--	--	--	--	--	--	--	--	--	--
c100188_g1	SC	3.00	2.94	293	780189210	XP_011663149.1	344	1.96725e-35	PREDICTED: zinc finger SWIM domain-containing protein 5 isoform X2 [Strongylocentrotus purpuratus]	--	--	--	--	--	--	--	--	--	Q9HCJ5	280	4.36747e-28	Zinc finger SWIM domain-containing protein 6 OS=Homo sapiens GN=ZSWIM6 PE=1 SV=2	--	--	--	--	--	--	--	--	--	--
c100189_g1	SC	20.00	12.08	339	--	--	--	--	--	--	--	--	--	--	--	--	--	--	--	--	--	--	PF01960	ArgJ family	GO:0006526//GO:0042967	arginine biosynthetic process//acyl-carrier-protein biosynthetic process	GO:0004358	glutamate N-acetyltransferase activity	--	--	--	--
c10018_g1	SC	17.00	2.27	750	--	--	--	--	--	--	--	--	--	--	--	--	--	--	--	--	--	--	PF00097	Zinc finger, C3HC4 type (RING finger)	--	--	GO:0046872	metal ion binding	--	--	--	--
c100190_g1	SC	3.00	4.43	266	--	--	--	--	--	--	--	--	--	--	--	--	--	--	--	--	--	--	--	--	--	--	--	--	--	--	--	--
c100191_g1	SC	4.00	6.36	262	--	--	--	--	--	--	--	--	--	--	--	--	--	--	--	--	--	--	--	--	--	--	--	--	--	--	--	--
c100192_g1	SC	1.00	3.85	225	--	--	--	--	--	--	--	--	--	--	--	--	--	--	--	--	--	--	--	--	--	--	--	--	--	--	--	--
c100194_g1	SC	3.00	2.42	309	--	--	--	--	--	--	--	--	--	--	--	--	--	--	--	--	--	--	--	--	--	--	--	--	--	--	--	--
c100196_g1	SC	18.00	3.82	554	--	--	--	--	--	--	--	--	--	--	--	--	--	--	--	--	--	--	--	--	--	--	--	--	--	--	--	--
c100197_g1	SC	6.00	3.96	329	--	--	--	--	--	--	--	--	--	--	--	--	--	--	--	--	--	--	--	--	--	--	--	--	--	--	--	--
c100198_g1	SC	2.00	7.05	228	--	--	--	--	--	--	--	--	--	--	--	--	--	--	--	--	--	--	--	--	--	--	--	--	--	--	--	--
c100199_g1	SC	22.00	5.23	519	--	--	--	--	--	--	--	--	--	--	--	--	--	--	--	--	--	--	--	--	--	--	--	--	--	--	--	--
c10019_g1	SC	2.00	1.12	348	--	--	--	--	--	--	--	--	--	--	--	--	--	--	--	--	--	--	--	--	--	--	--	--	--	--	--	--
c1001_g1	SC	295.00	23.49	1106	--	--	--	--	--	--	--	--	--	--	--	--	--	--	--	--	--	--	--	--	--	--	--	--	--	--	--	--
c100200_g1	SC	3.00	1.28	388	--	--	--	--	--	--	--	--	--	--	--	--	--	--	--	--	--	--	PF00619	Caspase recruitment domain	GO:0042981	regulation of apoptotic process	--	--	--	--	--	--
c100201_g1	SC	7.00	2.96	389	--	--	--	--	--	--	--	--	--	--	--	--	--	--	--	--	--	--	--	--	--	--	--	--	--	--	--	--
c100202_g1	SC	1.00	5.53	214	--	--	--	--	--	--	--	--	--	--	--	--	--	--	--	--	--	--	--	--	--	--	--	--	--	--	--	--
c100203_g1	SC	2.00	6.12	233	--	--	--	--	--	--	--	--	--	--	--	--	--	--	--	--	--	--	--	--	--	--	--	--	--	--	--	--
c100204_g1	SC	1.00	0.89	301	--	--	--	--	--	--	--	--	--	--	--	--	--	--	--	--	--	--	--	--	--	--	--	--	--	--	--	--
c100205_g1	SC	4.00	4.50	283	--	--	--	--	--	--	--	--	--	--	--	--	--	--	--	--	--	--	--	--	--	--	--	--	--	--	--	--
c100206_g1	SC	12.00	2.44	569	--	--	--	--	--	--	--	--	--	--	--	--	--	--	--	--	--	--	--	--	--	--	--	--	--	--	--	--
c100207_g1	SC	1.00	6.65	209	--	--	--	--	--	--	--	--	--	--	--	--	--	--	--	--	--	--	--	--	--	--	--	--	--	--	--	--
c100209_g1	SC	1.00	5.53	214	--	--	--	--	--	--	--	--	--	--	--	--	--	--	--	--	--	--	--	--	--	--	--	--	--	--	--	--
c10020_g1	SC	63.00	2.11	2318	780070958	XP_003725645.2	647	1.8193e-71	PREDICTED: transcription termination factor 2 [Strongylocentrotus purpuratus]	--	--	--	--	--	K15173	TTF2	transcription termination factor 2	http://www.genome.jp/dbget-bin/www_bget?ko:K15173	Q9UNY4	526	3.29535e-54	Transcription termination factor 2 OS=Homo sapiens GN=TTF2 PE=1 SV=2	--	--	--	--	--	--	--	--	KOG4439	RNA polymerase II transcription termination factor TTF2/lodestar, DEAD-box superfamily
c100210_g1	SC	2.00	12.81	210	--	--	--	--	--	--	--	--	--	--	--	--	--	--	--	--	--	--	--	--	--	--	--	--	--	--	--	--
c100211_g1	SC	1.00	1.43	268	--	--	--	--	--	--	--	--	--	--	--	--	--	--	--	--	--	--	--	--	--	--	--	--	--	--	--	--
c100212_g1	SC	1.00	3.42	229	780056327	XP_011669808.1	229	3.51012e-20	PREDICTED: sacsin [Strongylocentrotus purpuratus]	--	--	--	--	--	K17592	SACS	sacsin	http://www.genome.jp/dbget-bin/www_bget?ko:K17592	Q9NZJ4	160	2.25795e-12	Sacsin OS=Homo sapiens GN=SACS PE=1 SV=2	--	--	--	--	--	--	--	--	--	--
c100213_g1	SC	2.00	13.83	208	--	--	--	--	--	--	--	--	--	--	--	--	--	--	--	--	--	--	--	--	--	--	--	--	--	--	--	--
c100214_g1	SC	3.00	7.29	242	--	--	--	--	--	--	--	--	--	--	--	--	--	--	--	--	--	--	--	--	--	--	--	--	--	--	--	--
c100215_g1	SC	1.00	2.68	238	--	--	--	--	--	--	--	--	--	--	--	--	--	--	--	--	--	--	--	--	--	--	--	--	--	--	--	--
c100216_g1	SC	1.00	1.79	256	--	--	--	--	--	--	--	--	--	--	--	--	--	--	--	--	--	--	--	--	--	--	--	--	--	--	--	--
c100217_g1	SC	2.00	4.86	242	--	--	--	--	--	--	--	--	--	--	--	--	--	--	--	--	--	--	--	--	--	--	--	--	--	--	--	--
c100218_g1	SC	4.00	2.08	358	--	--	--	--	--	--	--	--	--	--	--	--	--	--	--	--	--	--	--	--	--	--	--	--	--	--	--	--
c100219_g1	SC	6.00	2.60	385	--	--	--	--	--	--	--	--	--	--	--	--	--	--	--	--	--	--	--	--	--	--	--	--	--	--	--	--
c10021_g1	SC	6.00	1.87	448	--	--	--	--	--	--	--	--	--	--	--	--	--	--	--	--	--	--	--	--	--	--	--	--	--	--	--	--
c100220_g1	SC	4.00	4.92	277	--	--	--	--	--	--	--	--	--	--	--	--	--	--	--	--	--	--	--	--	--	--	--	--	--	--	--	--
c100222_g1	SC	1.00	1.12	283	--	--	--	--	--	--	--	--	--	--	--	--	--	--	--	--	--	--	--	--	--	--	--	--	--	--	--	--
c100223_g1	SC	2.00	8.46	222	557294997	XP_006029921.1	160	3.64925e-11	PREDICTED: 85/88 kDa calcium-independent phospholipase A2 isoform X1 [Alligator sinensis]>gi|557294999|ref|XP_006029922.1| PREDICTED: 85/88 kDa calcium-independent phospholipase A2 isoform X2 [Alligator sinensis]>gi|557295001|ref|XP_006029923.1| PREDICTED: 85/88 kDa calcium-independent phospholipase A2 isoform X3 [Alligator sinensis]>gi|557295003|ref|XP_006029924.1| PREDICTED: 85/88 kDa calcium-i…	--	--	--	--	--	K16343	PLA2G6, IPLA2	calcium-independent phospholipase A2	http://www.genome.jp/dbget-bin/www_bget?ko:K16343	O60733	141	4.78266e-10	85/88 kDa calcium-independent phospholipase A2 OS=Homo sapiens GN=PLA2G6 PE=1 SV=2	PF00023	Ankyrin repeat	--	--	GO:0005515	protein binding	--	--	--	--
c100224_g1	SC	2.00	4.53	245	--	--	--	--	--	--	--	--	--	--	--	--	--	--	--	--	--	--	PF00487//PF09726//PF02535	Fatty acid desaturase//Transmembrane protein//ZIP Zinc transporter	GO:0030001//GO:0055085//GO:0006629	metal ion transport//transmembrane transport//lipid metabolic process	GO:0046873	metal ion transmembrane transporter activity	GO:0016021//GO:0016020	integral component of membrane//membrane	--	--
c100225_g1	SC	2.00	5.65	236	--	--	--	--	--	--	--	--	--	--	--	--	--	--	--	--	--	--	--	--	--	--	--	--	--	--	--	--
c100226_g1	SC	2.00	2.12	287	780013122	XP_011664056.1	139	5.01658e-08	PREDICTED: receptor-type tyrosine-protein phosphatase U-like [Strongylocentrotus purpuratus]	--	--	--	--	--	--	--	--	--	--	--	--	--	PF16656//PF00041	Purple acid Phosphatase, N-terminal domain//Fibronectin type III domain	GO:0019497//GO:0006771	hexachlorocyclohexane metabolic process//riboflavin metabolic process	GO:0005515//GO:0003993//GO:0046872	protein binding//acid phosphatase activity//metal ion binding	--	--	--	--
c100227_g1	SC	2.00	2.50	276	780024410	XP_011665740.1	225	6.67251e-20	PREDICTED: uncharacterized protein LOC105436430 [Strongylocentrotus purpuratus]	--	--	--	--	--	--	--	--	--	--	--	--	--	PF02202	Tachykinin family	GO:0007217//GO:0007268	tachykinin receptor signaling pathway//synaptic transmission	--	--	--	--	--	--
c100228_g1	SC	1.00	3.15	232	--	--	--	--	--	--	--	--	--	--	--	--	--	--	--	--	--	--	--	--	--	--	--	--	--	--	--	--
c100229_g1	SC	1.00	2.68	238	--	--	--	--	--	--	--	--	--	--	--	--	--	--	--	--	--	--	--	--	--	--	--	--	--	--	--	--
c10022_g1	SC	72.00	3.01	1904	--	--	--	--	--	--	--	--	--	--	--	--	--	--	--	--	--	--	PF16855	Small outer capsid protein	--	--	--	--	GO:0019028	viral capsid	--	--
c100231_g1	SC	2.00	1.15	345	--	--	--	--	--	--	--	--	--	--	--	--	--	--	--	--	--	--	--	--	--	--	--	--	--	--	--	--
c100232_g1	SC	1.00	0.79	311	--	--	--	--	--	--	--	--	--	--	--	--	--	--	--	--	--	--	--	--	--	--	--	--	--	--	--	--
c100233_g1	SC	3.00	2.23	317	--	--	--	--	--	--	--	--	--	--	--	--	--	--	--	--	--	--	--	--	--	--	--	--	--	--	--	--
c100234_g1	SC	2.00	5.24	239	--	--	--	--	--	--	--	--	--	--	--	--	--	--	--	--	--	--	--	--	--	--	--	--	--	--	--	--
c100235_g1	SC	6.00	4.28	321	--	--	--	--	--	--	--	--	--	--	--	--	--	--	--	--	--	--	--	--	--	--	--	--	--	--	--	--
c100236_g1	SC	3.00	4.77	262	--	--	--	--	--	--	--	--	--	--	--	--	--	--	--	--	--	--	--	--	--	--	--	--	--	--	--	--
c100237_g1	SC	1.00	2.43	242	--	--	--	--	--	--	--	--	--	--	--	--	--	--	--	--	--	--	--	--	--	--	--	--	--	--	--	--
c100238_g1	SC	1.00	1.45	267	--	--	--	--	--	--	--	--	--	--	--	--	--	--	--	--	--	--	--	--	--	--	--	--	--	--	--	--
c100239_g1	SC	1.00	9.20	201	--	--	--	--	--	--	--	--	--	--	--	--	--	--	--	--	--	--	--	--	--	--	--	--	--	--	--	--
c10023_g1	SC	20.00	3.65	608	--	--	--	--	--	--	--	--	--	--	--	--	--	--	--	--	--	--	PF00020	TNFR/NGFR cysteine-rich region	--	--	GO:0005515	protein binding	--	--	--	--
c100241_g1	SC	1.00	6.17	211	--	--	--	--	--	--	--	--	--	--	--	--	--	--	--	--	--	--	--	--	--	--	--	--	--	--	--	--
c100242_g1	SC	2.00	11.07	214	--	--	--	--	--	--	--	--	--	--	--	--	--	--	--	--	--	--	--	--	--	--	--	--	--	--	--	--
c100243_g1	SC	2.00	2.81	269	--	--	--	--	--	--	--	--	--	--	--	--	--	--	--	--	--	--	--	--	--	--	--	--	--	--	--	--
c100244_g1	SC	7.00	3.37	369	--	--	--	--	--	--	--	--	--	--	--	--	--	--	--	--	--	--	--	--	--	--	--	--	--	--	--	--
c100245_g1	SC	2.00	9.32	219	159145694	ABW90384.1	304	2.39637e-34	putative ribosomal protein S25 [Sipunculus nudus]	697001714	XM_009568639.1	64	2.27016e-23	PREDICTED: Cuculus canorus ribosomal protein S25 (RPS25), mRNA	K02975	RP-S25e, RPS25	small subunit ribosomal protein S25e	http://www.genome.jp/dbget-bin/www_bget?ko:K02975	Q962Q5	272	1.90534e-30	40S ribosomal protein S25 OS=Spodoptera frugiperda GN=RpS25 PE=3 SV=1	PF08220//PF01325//PF09339	DeoR-like helix-turn-helix domain//Iron dependent repressor, N-terminal DNA binding domain//IclR helix-turn-helix domain	GO:0006355	regulation of transcription, DNA-templated	GO:0003700//GO:0003677	transcription factor activity, sequence-specific DNA binding//DNA binding	GO:0005667//GO:0005622	transcription factor complex//intracellular	KOG1767	40S ribosomal protein S25
c100246_g1	SC	2.00	3.18	262	--	--	--	--	--	--	--	--	--	--	--	--	--	--	--	--	--	--	--	--	--	--	--	--	--	--	--	--
c100247_g1	SC	7.00	3.44	366	--	--	--	--	--	--	--	--	--	--	--	--	--	--	--	--	--	--	--	--	--	--	--	--	--	--	--	--
c100248_g1	SC	2.00	2.15	286	390340353	XP_797235.2	158	1.45752e-11	PREDICTED: uncharacterized protein LOC592629 [Strongylocentrotus purpuratus]	--	--	--	--	--	--	--	--	--	--	--	--	--	--	--	--	--	--	--	--	--	--	--
c100249_g1	SC	2.00	14.38	207	--	--	--	--	--	--	--	--	--	--	--	--	--	--	--	--	--	--	--	--	--	--	--	--	--	--	--	--
c10024_g1	SC	3.00	6.07	250	--	--	--	--	--	--	--	--	--	--	--	--	--	--	--	--	--	--	--	--	--	--	--	--	--	--	--	--
c100250_g1	SC	1.00	7.79	205	--	--	--	--	--	--	--	--	--	--	--	--	--	--	--	--	--	--	--	--	--	--	--	--	--	--	--	--
c100251_g1	SC	1.00	9.20	201	--	--	--	--	--	--	--	--	--	--	--	--	--	--	--	--	--	--	--	--	--	--	--	--	--	--	--	--
c100252_g1	SC	3.00	14.96	217	--	--	--	--	--	--	--	--	--	--	--	--	--	--	--	--	--	--	--	--	--	--	--	--	--	--	--	--
c100253_g1	SC	1.00	7.19	207	--	--	--	--	--	--	--	--	--	--	--	--	--	--	--	--	--	--	--	--	--	--	--	--	--	--	--	--
c100254_g1	SC	1.00	3.74	226	--	--	--	--	--	--	--	--	--	--	--	--	--	--	--	--	--	--	--	--	--	--	--	--	--	--	--	--
c100255_g1	SC	2.00	1.41	322	--	--	--	--	--	--	--	--	--	--	--	--	--	--	--	--	--	--	--	--	--	--	--	--	--	--	--	--
c100256_g1	SC	3.00	1.35	379	--	--	--	--	--	--	--	--	--	--	--	--	--	--	--	--	--	--	--	--	--	--	--	--	--	--	--	--
c100257_g1	SC	3.00	16.60	214	--	--	--	--	--	--	--	--	--	--	--	--	--	--	--	--	--	--	--	--	--	--	--	--	--	--	--	--
c100259_g1	SC	4.00	2.19	351	--	--	--	--	--	--	--	--	--	--	--	--	--	--	--	--	--	--	--	--	--	--	--	--	--	--	--	--
c10025_g1	SC	17.00	2.39	724	780127819	XP_011678859.1	324	6.43011e-31	PREDICTED: anoctamin-4 isoform X3 [Strongylocentrotus purpuratus]	--	--	--	--	--	--	--	--	--	--	--	--	--	PF07573//PF03839//PF16178//PF03552	Nitrogen regulatory protein AreA N terminus//Translocation protein Sec62//Dimerisation domain of Ca+-activated chloride-channel, anoctamin//Cellulose synthase	GO:0005982//GO:0006011//GO:0030244//GO:0005985//GO:0015031//GO:0042128	starch metabolic process//UDP-glucose metabolic process//cellulose biosynthetic process//sucrose metabolic process//protein transport//nitrate assimilation	GO:0046983//GO:0016760//GO:0008565//GO:0003677//GO:0008270	protein dimerization activity//cellulose synthase (UDP-forming) activity//protein transporter activity//DNA binding//zinc ion binding	GO:0005634//GO:0016021//GO:0016020	nucleus//integral component of membrane//membrane	--	--
c100260_g1	SC	1.00	8.82	202	--	--	--	--	--	--	--	--	--	--	--	--	--	--	--	--	--	--	--	--	--	--	--	--	--	--	--	--
c100261_g1	SC	3.00	3.32	284	--	--	--	--	--	--	--	--	--	--	--	--	--	--	--	--	--	--	--	--	--	--	--	--	--	--	--	--
c100263_g1	SC	4.00	1.15	468	--	--	--	--	--	--	--	--	--	--	--	--	--	--	--	--	--	--	--	--	--	--	--	--	--	--	--	--
c100266_g1	SC	2.00	4.98	241	--	--	--	--	--	--	--	--	--	--	--	--	--	--	--	--	--	--	--	--	--	--	--	--	--	--	--	--
c100267_g1	SC	1.00	5.73	213	--	--	--	--	--	--	--	--	--	--	--	--	--	--	--	--	--	--	--	--	--	--	--	--	--	--	--	--
c100268_g1	SC	2.00	5.37	238	--	--	--	--	--	--	--	--	--	--	--	--	--	--	--	--	--	--	--	--	--	--	--	--	--	--	--	--
c100269_g1	SC	3.00	17.20	213	--	--	--	--	--	--	--	--	--	--	--	--	--	--	--	--	--	--	--	--	--	--	--	--	--	--	--	--
c10026_g1	SC	1.00	1.14	282	--	--	--	--	--	--	--	--	--	--	--	--	--	--	--	--	--	--	--	--	--	--	--	--	--	--	--	--
c100270_g1	SC	6.00	3.31	350	--	--	--	--	--	--	--	--	--	--	--	--	--	--	--	--	--	--	--	--	--	--	--	--	--	--	--	--
c100271_g1	SC	3.00	6.07	250	--	--	--	--	--	--	--	--	--	--	--	--	--	--	--	--	--	--	--	--	--	--	--	--	--	--	--	--
c100272_g1	SC	7.00	2.02	467	--	--	--	--	--	--	--	--	--	--	--	--	--	--	--	--	--	--	PF07271	Cytadhesin P30/P32	GO:0009405//GO:0007157	pathogenesis//heterophilic cell-cell adhesion via plasma membrane cell adhesion molecules	--	--	GO:0016021	integral component of membrane	--	--
c100273_g1	SC	5.00	2.78	349	780013429	XP_011664103.1	330	2.44944e-33	PREDICTED: coiled-coil domain-containing protein 108 [Strongylocentrotus purpuratus]	--	--	--	--	--	--	--	--	--	Q6ZU64	239	2.53772e-22	Coiled-coil domain-containing protein 108 OS=Homo sapiens GN=CCDC108 PE=1 SV=2	PF01993	methylene-5,6,7,8-tetrahydromethanopterin dehydrogenase	GO:0015948//GO:0055114	methanogenesis//oxidation-reduction process	GO:0008901	ferredoxin hydrogenase activity	GO:0009375	ferredoxin hydrogenase complex	--	--
c100274_g1	SC	8.00	2.40	457	--	--	--	--	--	--	--	--	--	--	--	--	--	--	--	--	--	--	--	--	--	--	--	--	--	--	--	--
c100275_g1	SC	2.00	7.48	226	--	--	--	--	--	--	--	--	--	--	--	--	--	--	--	--	--	--	--	--	--	--	--	--	--	--	--	--
c100276_g1	SC	3.00	4.43	266	--	--	--	--	--	--	--	--	--	--	--	--	--	--	--	--	--	--	--	--	--	--	--	--	--	--	--	--
c100278_g1	SC	6.00	1.61	485	--	--	--	--	--	--	--	--	--	--	--	--	--	--	--	--	--	--	--	--	--	--	--	--	--	--	--	--
c100279_g1	SC	1.00	1.79	256	--	--	--	--	--	--	--	--	--	--	--	--	--	--	--	--	--	--	--	--	--	--	--	--	--	--	--	--
c10027_g1	SC	51.00	9.64	595	--	--	--	--	--	--	--	--	--	--	--	--	--	--	--	--	--	--	--	--	--	--	--	--	--	--	--	--
c100280_g1	SC	3.00	3.19	287	--	--	--	--	--	--	--	--	--	--	--	--	--	--	--	--	--	--	--	--	--	--	--	--	--	--	--	--
c100281_g1	SC	1.00	3.53	228	--	--	--	--	--	--	--	--	--	--	--	--	--	--	--	--	--	--	--	--	--	--	--	--	--	--	--	--
c100282_g1	SC	2.00	4.98	241	--	--	--	--	--	--	--	--	--	--	--	--	--	--	--	--	--	--	--	--	--	--	--	--	--	--	--	--
c100283_g1	SC	1.00	8.11	204	--	--	--	--	--	--	--	--	--	--	--	--	--	--	--	--	--	--	--	--	--	--	--	--	--	--	--	--
c100284_g1	SC	1.00	5.16	216	--	--	--	--	--	--	--	--	--	--	--	--	--	--	--	--	--	--	--	--	--	--	--	--	--	--	--	--
c100285_g1	SC	1.00	4.23	222	--	--	--	--	--	--	--	--	--	--	--	--	--	--	--	--	--	--	--	--	--	--	--	--	--	--	--	--
c100286_g1	SC	1.00	4.99	217	--	--	--	--	--	--	--	--	--	--	--	--	--	--	--	--	--	--	--	--	--	--	--	--	--	--	--	--
c100287_g1	SC	3.00	4.51	265	--	--	--	--	--	--	--	--	--	--	--	--	--	--	--	--	--	--	--	--	--	--	--	--	--	--	--	--
c100288_g1	SC	2.00	17.64	202	--	--	--	--	--	--	--	--	--	--	--	--	--	--	--	--	--	--	--	--	--	--	--	--	--	--	--	--
c100289_g1	SC	1.00	2.68	238	--	--	--	--	--	--	--	--	--	--	--	--	--	--	--	--	--	--	--	--	--	--	--	--	--	--	--	--
c10028_g1	SC	85.00	8.45	930	--	--	--	--	--	--	--	--	--	--	--	--	--	--	--	--	--	--	--	--	--	--	--	--	--	--	--	--
c100291_g1	SC	5.00	3.15	334	--	--	--	--	--	--	--	--	--	--	--	--	--	--	--	--	--	--	--	--	--	--	--	--	--	--	--	--
c100292_g1	SC	3.00	7.47	241	--	--	--	--	--	--	--	--	--	--	--	--	--	--	--	--	--	--	--	--	--	--	--	--	--	--	--	--
c100294_g1	SC	2.00	0.97	368	--	--	--	--	--	--	--	--	--	--	--	--	--	--	--	--	--	--	--	--	--	--	--	--	--	--	--	--
c100295_g1	SC	2.00	2.46	277	--	--	--	--	--	--	--	--	--	--	--	--	--	--	--	--	--	--	--	--	--	--	--	--	--	--	--	--
c100296_g1	SC	7.00	2.52	418	--	--	--	--	--	--	--	--	--	--	--	--	--	--	--	--	--	--	--	--	--	--	--	--	--	--	--	--
c100297_g1	SC	3.00	4.95	260	--	--	--	--	--	--	--	--	--	--	--	--	--	--	--	--	--	--	--	--	--	--	--	--	--	--	--	--
c100298_g1	SC	1.00	1.59	262	--	--	--	--	--	--	--	--	--	--	--	--	--	--	--	--	--	--	--	--	--	--	--	--	--	--	--	--
c100299_g1	SC	1.00	7.48	206	--	--	--	--	--	--	--	--	--	--	--	--	--	--	--	--	--	--	PF05187	Electron transfer flavoprotein-ubiquinone oxidoreductase, 4Fe-4S	GO:0055114	oxidation-reduction process	GO:0004174	electron-transferring-flavoprotein dehydrogenase activity	--	--	--	--
c10029_g1	SC	5.00	1.44	467	--	--	--	--	--	--	--	--	--	--	--	--	--	--	--	--	--	--	--	--	--	--	--	--	--	--	--	--
c1002_g1	SC	2.00	1.25	335	--	--	--	--	--	--	--	--	--	--	--	--	--	--	--	--	--	--	--	--	--	--	--	--	--	--	--	--
c100301_g1	SC	5.00	5.24	288	780064226	XP_011670782.1	470	4.64653e-52	PREDICTED: dynein heavy chain 5, axonemal [Strongylocentrotus purpuratus]	--	--	--	--	--	K10408	DNAH	dynein heavy chain, axonemal	http://www.genome.jp/dbget-bin/www_bget?ko:K10408	Q8TE73	381	1.55449e-41	Dynein heavy chain 5, axonemal OS=Homo sapiens GN=DNAH5 PE=1 SV=3	PF03028	Dynein heavy chain and region D6 of dynein motor	GO:0007017//GO:0007018	microtubule-based process//microtubule-based movement	GO:0003777	microtubule motor activity	GO:0030286//GO:0005874	dynein complex//microtubule	KOG3595	Dyneins, heavy chain
c100302_g1	SC	1.00	1.14	282	390342766	XP_001181782.2	209	2.43462e-17	PREDICTED: uncharacterized protein LOC753295 [Strongylocentrotus purpuratus]	--	--	--	--	--	--	--	--	--	--	--	--	--	--	--	--	--	--	--	--	--	--	--
c100303_g1	SC	4.00	3.50	302	808879410	KKF27456.1	184	4.76216e-14	Tripartite motif-containing protein 45 [Larimichthys crocea]	--	--	--	--	--	K12021	TRIM45	tripartite motif-containing protein 45	http://www.genome.jp/dbget-bin/www_bget?ko:K12021	Q9H8W5	157	6.50832e-12	Tripartite motif-containing protein 45 OS=Homo sapiens GN=TRIM45 PE=1 SV=2	--	--	--	--	--	--	--	--	--	--
c100304_g1	SC	2.00	3.50	257	--	--	--	--	--	--	--	--	--	--	--	--	--	--	--	--	--	--	--	--	--	--	--	--	--	--	--	--
c100305_g1	SC	3.00	4.28	268	156354052	XP_001623217.1	228	8.20841e-20	predicted protein [Nematostella vectensis]>gi|156209894|gb|EDO31117.1| predicted protein, partial [Nematostella vectensis]	--	--	--	--	--	--	--	--	--	Q9ULI1	113	3.25838e-06	NACHT and WD repeat domain-containing protein 2 OS=Homo sapiens GN=NWD2 PE=2 SV=3	--	--	--	--	--	--	--	--	KOG3602	WD40 repeat-containing protein
c100306_g1	SC	2.00	7.95	224	676459652	XP_009055370.1	162	9.39329e-12	hypothetical protein LOTGIDRAFT_228523 [Lottia gigantea]>gi|556105090|gb|ESO93742.1| hypothetical protein LOTGIDRAFT_228523 [Lottia gigantea]	--	--	--	--	--	--	--	--	--	--	--	--	--	--	--	--	--	--	--	--	--	--	--
c100307_g1	SC	6.00	2.38	400	--	--	--	--	--	--	--	--	--	--	--	--	--	--	--	--	--	--	--	--	--	--	--	--	--	--	--	--
c100308_g1	SC	1.00	2.98	234	--	--	--	--	--	--	--	--	--	--	--	--	--	--	--	--	--	--	--	--	--	--	--	--	--	--	--	--
c100309_g1	SC	3.00	9.19	233	--	--	--	--	--	--	--	--	--	--	--	--	--	--	--	--	--	--	--	--	--	--	--	--	--	--	--	--
c10030_g1	SC	12.00	3.77	447	--	--	--	--	--	--	--	--	--	--	--	--	--	--	--	--	--	--	--	--	--	--	--	--	--	--	--	--
c100310_g1	SC	1.00	8.11	204	--	--	--	--	--	--	--	--	--	--	--	--	--	--	--	--	--	--	--	--	--	--	--	--	--	--	--	--
c100311_g1	SC	2.00	4.64	244	260820948	XP_002605796.1	187	1.50122e-15	hypothetical protein BRAFLDRAFT_121902 [Branchiostoma floridae]>gi|229291131|gb|EEN61806.1| hypothetical protein BRAFLDRAFT_121902 [Branchiostoma floridae]	--	--	--	--	--	--	--	--	--	--	--	--	--	--	--	--	--	--	--	--	--	--	--
c100313_g1	SC	2.00	7.71	225	--	--	--	--	--	--	--	--	--	--	--	--	--	--	--	--	--	--	--	--	--	--	--	--	--	--	--	--
c100314_g1	SC	3.00	27.61	201	--	--	--	--	--	--	--	--	--	--	--	--	--	--	--	--	--	--	--	--	--	--	--	--	--	--	--	--
c100315_g1	SC	3.00	4.51	265	--	--	--	--	--	--	--	--	--	--	--	--	--	--	--	--	--	--	PF07649	C1-like domain	GO:0055114	oxidation-reduction process	GO:0047134	protein-disulfide reductase activity	--	--	--	--
c100316_g1	SC	2.00	3.96	251	--	--	--	--	--	--	--	--	--	--	--	--	--	--	--	--	--	--	--	--	--	--	--	--	--	--	--	--
c100317_g1	SC	2.00	6.85	229	--	--	--	--	--	--	--	--	--	--	--	--	--	--	--	--	--	--	--	--	--	--	--	--	--	--	--	--
c10031_g1	SC	2.00	2.50	276	--	--	--	--	--	--	--	--	--	--	--	--	--	--	--	--	--	--	--	--	--	--	--	--	--	--	--	--
c100320_g1	SC	2.00	2.90	267	--	--	--	--	--	--	--	--	--	--	--	--	--	--	--	--	--	--	--	--	--	--	--	--	--	--	--	--
c100321_g1	SC	1.00	1.33	272	--	--	--	--	--	--	--	--	--	--	--	--	--	--	--	--	--	--	--	--	--	--	--	--	--	--	--	--
c100323_g1	SC	2.00	4.23	248	--	--	--	--	--	--	--	--	--	--	--	--	--	--	--	--	--	--	--	--	--	--	--	--	--	--	--	--
c100324_g1	SC	1.00	5.95	212	--	--	--	--	--	--	--	--	--	--	--	--	--	--	--	--	--	--	--	--	--	--	--	--	--	--	--	--
c100325_g1	SC	2.00	11.47	213	--	--	--	--	--	--	--	--	--	--	--	--	--	--	--	--	--	--	--	--	--	--	--	--	--	--	--	--
c100326_g1	SC	3.00	3.32	284	--	--	--	--	--	--	--	--	--	--	--	--	--	--	--	--	--	--	--	--	--	--	--	--	--	--	--	--
c100327_g1	SC	8.00	2.52	446	--	--	--	--	--	--	--	--	--	--	--	--	--	--	--	--	--	--	PF04564	U-box domain	GO:0016567	protein ubiquitination	GO:0004842	ubiquitin-protein transferase activity	--	--	--	--
c100328_g1	SC	3.00	2.40	310	--	--	--	--	--	--	--	--	--	--	--	--	--	--	--	--	--	--	--	--	--	--	--	--	--	--	--	--
c100329_g1	SC	8.00	2.38	459	--	--	--	--	--	--	--	--	--	--	--	--	--	--	--	--	--	--	--	--	--	--	--	--	--	--	--	--
c10032_g1	SC	5.00	7.52	265	--	--	--	--	--	--	--	--	--	--	--	--	--	--	--	--	--	--	--	--	--	--	--	--	--	--	--	--
c100331_g1	SC	1.00	2.90	235	--	--	--	--	--	--	--	--	--	--	--	--	--	--	--	--	--	--	--	--	--	--	--	--	--	--	--	--
c100332_g1	SC	1.00	1.53	264	--	--	--	--	--	--	--	--	--	--	--	--	--	--	--	--	--	--	PF02949	7tm Odorant receptor	GO:0007187//GO:0007608	G-protein coupled receptor signaling pathway, coupled to cyclic nucleotide second messenger//sensory perception of smell	GO:0004984//GO:0005549	olfactory receptor activity//odorant binding	GO:0016020	membrane	--	--
c100333_g1	SC	2.00	3.18	262	699251329	XP_009858823.1	246	1.96844e-23	PREDICTED: receptor-type tyrosine-protein phosphatase gamma-like, partial [Ciona intestinalis]	--	--	--	--	--	K16667	PTPRG	receptor-type tyrosine-protein phosphatase gamma	http://www.genome.jp/dbget-bin/www_bget?ko:K16667	Q9W6V5	213	2.92314e-19	Receptor-type tyrosine-protein phosphatase eta OS=Gallus gallus GN=PTPRJ PE=2 SV=2	PF00102	Protein-tyrosine phosphatase	GO:0006470//GO:0006570	protein dephosphorylation//tyrosine metabolic process	GO:0004725	protein tyrosine phosphatase activity	--	--	KOG0789	Protein tyrosine phosphatase
c100336_g1	SC	1.00	7.48	206	--	--	--	--	--	--	--	--	--	--	--	--	--	--	--	--	--	--	--	--	--	--	--	--	--	--	--	--
c100337_g1	SC	1.00	4.66	219	--	--	--	--	--	--	--	--	--	--	--	--	--	--	--	--	--	--	--	--	--	--	--	--	--	--	--	--
c100338_g1	SC	4.00	2.10	357	--	--	--	--	--	--	--	--	--	--	--	--	--	--	--	--	--	--	--	--	--	--	--	--	--	--	--	--
c100339_g1	SC	2.00	4.23	248	--	--	--	--	--	--	--	--	--	--	--	--	--	--	--	--	--	--	--	--	--	--	--	--	--	--	--	--
c10033_g1	SC	2.00	1.71	304	--	--	--	--	--	--	--	--	--	--	--	--	--	--	--	--	--	--	--	--	--	--	--	--	--	--	--	--
c100340_g1	SC	1.00	2.68	238	--	--	--	--	--	--	--	--	--	--	--	--	--	--	--	--	--	--	--	--	--	--	--	--	--	--	--	--
c100341_g1	SC	4.00	8.85	246	--	--	--	--	--	--	--	--	--	--	--	--	--	--	--	--	--	--	--	--	--	--	--	--	--	--	--	--
c100342_g1	SC	2.00	7.95	224	--	--	--	--	--	--	--	--	--	--	--	--	--	--	--	--	--	--	--	--	--	--	--	--	--	--	--	--
c100343_g1	SC	5.00	3.43	325	--	--	--	--	--	--	--	--	--	--	--	--	--	--	--	--	--	--	PF05162	Ribosomal protein L41	GO:0042254//GO:0006412	ribosome biogenesis//translation	GO:0003735	structural constituent of ribosome	GO:0005840	ribosome	--	--
c100345_g1	SC	5.00	4.38	302	--	--	--	--	--	--	--	--	--	--	--	--	--	--	--	--	--	--	--	--	--	--	--	--	--	--	--	--
c100346_g1	SC	4.00	2.55	333	--	--	--	--	--	--	--	--	--	--	--	--	--	--	--	--	--	--	--	--	--	--	--	--	--	--	--	--
c100348_g1	SC	5.00	3.56	321	780022000	XP_003730084.2	168	1.05079e-11	PREDICTED: zonadhesin [Strongylocentrotus purpuratus]	--	--	--	--	--	--	--	--	--	Q9Y6R7	118	1.26347e-06	IgGFc-binding protein OS=Homo sapiens GN=FCGBP PE=1 SV=3	PF09329	Primase zinc finger	GO:0006260	DNA replication	--	--	GO:0005634	nucleus	--	--
c100349_g1	SC	2.00	3.37	259	--	--	--	--	--	--	--	--	--	--	--	--	--	--	--	--	--	--	--	--	--	--	--	--	--	--	--	--
c10034_g1	SC	20.00	8.03	398	--	--	--	--	--	--	--	--	--	--	--	--	--	--	--	--	--	--	--	--	--	--	--	--	--	--	--	--
c100350_g1	SC	1.00	0.71	322	--	--	--	--	--	--	--	--	--	--	--	--	--	--	--	--	--	--	--	--	--	--	--	--	--	--	--	--
c100351_g1	SC	1.00	6.40	210	--	--	--	--	--	--	--	--	--	--	--	--	--	--	--	--	--	--	--	--	--	--	--	--	--	--	--	--
c100352_g1	SC	2.00	3.96	251	808868951	KKF19146.1	128	1.25612e-07	Leucine-rich repeat-containing protein 3 [Larimichthys crocea]	--	--	--	--	--	--	--	--	--	A8WHP9	114	1.03181e-06	Leucine-rich repeat-containing protein 3 OS=Danio rerio GN=lrrc3 PE=2 SV=1	PF13855	Leucine rich repeat	--	--	GO:0005515	protein binding	--	--	KOG0619	FOG: Leucine rich repeat
c100354_g1	SC	4.00	6.60	260	--	--	--	--	--	--	--	--	--	--	--	--	--	--	--	--	--	--	--	--	--	--	--	--	--	--	--	--
c100355_g1	SC	2.00	10.68	215	--	--	--	--	--	--	--	--	--	--	--	--	--	--	--	--	--	--	--	--	--	--	--	--	--	--	--	--
c100356_g1	SC	3.00	2.63	302	--	--	--	--	--	--	--	--	--	--	--	--	--	--	--	--	--	--	--	--	--	--	--	--	--	--	--	--
c100357_g1	SC	3.00	2.79	297	780176917	XP_011661466.1	167	9.3633e-13	PREDICTED: 39S ribosomal protein L39, mitochondrial isoform X5 [Strongylocentrotus purpuratus]	--	--	--	--	--	K17420	MRPL39	large subunit ribosomal protein L39	http://www.genome.jp/dbget-bin/www_bget?ko:K17420	--	--	--	--	--	--	--	--	--	--	--	--	--	--
c100358_g1	SC	10.00	5.84	343	--	--	--	--	--	--	--	--	--	--	--	--	--	--	--	--	--	--	--	--	--	--	--	--	--	--	--	--
c10035_g1	SC	37.00	5.55	692	780029224	XP_011666444.1	326	4.88325e-32	PREDICTED: N-acetylated-alpha-linked acidic dipeptidase 2 [Strongylocentrotus purpuratus]	--	--	--	--	--	K01301	NAALAD	N-acetylated-alpha-linked acidic dipeptidase	http://www.genome.jp/dbget-bin/www_bget?ko:K01301	O35409	238	4.65184e-21	Glutamate carboxypeptidase 2 OS=Mus musculus GN=Folh1 PE=2 SV=2	PF13492//PF08559	GAF domain//Cut8, nuclear proteasome tether protein	GO:0031144//GO:0071630	proteasome localization//nucleus-associated proteasomal ubiquitin-dependent protein catabolic process	GO:0005515	protein binding	GO:0005634	nucleus	--	--
c100360_g1	SC	1.00	1.75	257	--	--	--	--	--	--	--	--	--	--	--	--	--	--	--	--	--	--	--	--	--	--	--	--	--	--	--	--
c100361_g1	SC	3.00	2.00	328	--	--	--	--	--	--	--	--	--	--	--	--	--	--	--	--	--	--	--	--	--	--	--	--	--	--	--	--
c100362_g1	SC	1.00	8.82	202	--	--	--	--	--	--	--	--	--	--	--	--	--	--	--	--	--	--	--	--	--	--	--	--	--	--	--	--
c100364_g1	SC	2.00	6.29	232	--	--	--	--	--	--	--	--	--	--	--	--	--	--	--	--	--	--	--	--	--	--	--	--	--	--	--	--
c100365_g1	SC	5.00	2.90	344	--	--	--	--	--	--	--	--	--	--	--	--	--	--	--	--	--	--	--	--	--	--	--	--	--	--	--	--
c100366_g1	SC	4.00	3.34	306	--	--	--	--	--	--	--	--	--	--	--	--	--	--	--	--	--	--	--	--	--	--	--	--	--	--	--	--
c100367_g1	SC	1.00	3.24	231	--	--	--	--	--	--	--	--	--	--	--	--	--	--	--	--	--	--	--	--	--	--	--	--	--	--	--	--
c100368_g1	SC	21.00	7.00	434	--	--	--	--	--	--	--	--	--	--	--	--	--	--	--	--	--	--	--	--	--	--	--	--	--	--	--	--
c100369_g1	SC	1.00	5.34	215	--	--	--	--	--	--	--	--	--	--	--	--	--	--	--	--	--	--	--	--	--	--	--	--	--	--	--	--
c10036_g1	SC	6.00	4.41	318	--	--	--	--	--	--	--	--	--	--	--	--	--	--	--	--	--	--	--	--	--	--	--	--	--	--	--	--
c100370_g1	SC	7.00	11.34	261	--	--	--	--	--	--	--	--	--	--	--	--	--	--	--	--	--	--	--	--	--	--	--	--	--	--	--	--
c100371_g1	SC	1.00	5.95	212	871212124	XP_012946711.1	187	1.1074e-14	PREDICTED: dynein gamma chain, flagellar outer arm-like [Aplysia californica]	--	--	--	--	--	K10408	DNAH	dynein heavy chain, axonemal	http://www.genome.jp/dbget-bin/www_bget?ko:K10408	--	--	--	--	PF03028	Dynein heavy chain and region D6 of dynein motor	GO:0007018//GO:0007017	microtubule-based movement//microtubule-based process	GO:0003777	microtubule motor activity	GO:0030286//GO:0005874	dynein complex//microtubule	--	--
c100372_g1	SC	5.00	1.85	413	--	--	--	--	--	--	--	--	--	--	--	--	--	--	--	--	--	--	--	--	--	--	--	--	--	--	--	--
c100373_g1	SC	5.00	6.15	277	--	--	--	--	--	--	--	--	--	--	--	--	--	--	--	--	--	--	--	--	--	--	--	--	--	--	--	--
c100374_g1	SC	1.00	6.65	209	768963478	XP_011619644.1	296	2.20165e-32	PREDICTED: homeobox protein HMX1-like, partial [Takifugu rubripes]	583991915	XM_006791072.1	70	9.92676e-27	PREDICTED: Neolamprologus brichardi homeobox protein HMX3-B-like (LOC102776485), mRNA	K09349	NKX5, HMX	homeobox protein Nkx-5	http://www.genome.jp/dbget-bin/www_bget?ko:K09349	Q90XP0	295	3.24815e-32	Homeobox protein HMX3-A OS=Oryzias latipes GN=hmx3a PE=2 SV=1	PF00046//PF05920	Homeobox domain//Homeobox KN domain	GO:0006355	regulation of transcription, DNA-templated	GO:0003677	DNA binding	--	--	KOG0485	Transcription factor NKX-5.1/HMX1, contains HOX domain
c100375_g1	SC	1.00	6.40	210	--	--	--	--	--	--	--	--	--	--	--	--	--	--	--	--	--	--	--	--	--	--	--	--	--	--	--	--
c100378_g1	SC	2.00	11.07	214	--	--	--	--	--	--	--	--	--	--	--	--	--	--	--	--	--	--	--	--	--	--	--	--	--	--	--	--
c100381_g1	SC	2.00	2.58	274	--	--	--	--	--	--	--	--	--	--	--	--	--	--	--	--	--	--	--	--	--	--	--	--	--	--	--	--
c100383_g1	SC	1.00	5.16	216	--	--	--	--	--	--	--	--	--	--	--	--	--	--	--	--	--	--	--	--	--	--	--	--	--	--	--	--
c100384_g1	SC	9.00	2.46	480	--	--	--	--	--	--	--	--	--	--	--	--	--	--	--	--	--	--	--	--	--	--	--	--	--	--	--	--
c100385_g1	SC	2.00	1.44	320	--	--	--	--	--	--	--	--	--	--	--	--	--	--	--	--	--	--	--	--	--	--	--	--	--	--	--	--
c100387_g1	SC	7.00	2.86	395	--	--	--	--	--	--	--	--	--	--	--	--	--	--	--	--	--	--	--	--	--	--	--	--	--	--	--	--
c100388_g1	SC	1.00	9.20	201	--	--	--	--	--	--	--	--	--	--	--	--	--	--	--	--	--	--	--	--	--	--	--	--	--	--	--	--
c100389_g1	SC	3.00	3.14	288	--	--	--	--	--	--	--	--	--	--	--	--	--	--	--	--	--	--	--	--	--	--	--	--	--	--	--	--
c10038_g1	SC	76.00	12.17	662	--	--	--	--	--	--	--	--	--	--	--	--	--	--	--	--	--	--	--	--	--	--	--	--	--	--	--	--
c100390_g1	SC	2.00	4.05	250	--	--	--	--	--	--	--	--	--	--	--	--	--	--	--	--	--	--	--	--	--	--	--	--	--	--	--	--
c100391_g1	SC	3.00	2.37	311	--	--	--	--	--	--	--	--	--	--	--	--	--	--	--	--	--	--	--	--	--	--	--	--	--	--	--	--
c100392_g1	SC	2.00	4.43	246	--	--	--	--	--	--	--	--	--	--	--	--	--	--	--	--	--	--	--	--	--	--	--	--	--	--	--	--
c100394_g1	SC	5.00	1.95	403	390357715	XP_003729082.1	481	2.04918e-55	PREDICTED: N-acetyllactosaminide beta-1,6-N-acetylglucosaminyl-transferase, isoform C-like [Strongylocentrotus purpuratus]>gi|780010857|ref|XP_011663744.1| PREDICTED: N-acetyllactosaminide beta-1,6-N-acetylglucosaminyl-transferase, isoform C-like [Strongylocentrotus purpuratus]>gi|780010863|ref|XP_011663745.1| PREDICTED: N-acetyllactosaminide beta-1,6-N-acetylglucosaminyl-transferase, isoform C-l…	--	--	--	--	--	K00742	GCNT2	N-acetyllactosaminide beta-1,6-N-acetylglucosaminyltransferase	http://www.genome.jp/dbget-bin/www_bget?ko:K00742	Q06430	343	1.72327e-37	N-acetyllactosaminide beta-1,6-N-acetylglucosaminyl-transferase, isoform B OS=Homo sapiens GN=GCNT2 PE=2 SV=1	PF02485	Core-2/I-Branching enzyme	--	--	GO:0008375	acetylglucosaminyltransferase activity	GO:0016020	membrane	--	--
c100395_g1	SC	2.00	17.64	202	--	--	--	--	--	--	--	--	--	--	--	--	--	--	--	--	--	--	--	--	--	--	--	--	--	--	--	--
c100396_g1	SC	5.00	8.42	259	--	--	--	--	--	--	--	--	--	--	--	--	--	--	--	--	--	--	--	--	--	--	--	--	--	--	--	--
c100397_g1	SC	5.00	2.83	347	--	--	--	--	--	--	--	--	--	--	--	--	--	--	--	--	--	--	--	--	--	--	--	--	--	--	--	--
c100398_g1	SC	2.00	4.43	246	--	--	--	--	--	--	--	--	--	--	--	--	--	--	--	--	--	--	--	--	--	--	--	--	--	--	--	--
c100399_g1	SC	3.00	15.48	216	--	--	--	--	--	--	--	--	--	--	--	--	--	--	--	--	--	--	--	--	--	--	--	--	--	--	--	--
c10039_g1	SC	1.00	1.12	283	--	--	--	--	--	--	--	--	--	--	--	--	--	--	--	--	--	--	PF00174	Oxidoreductase molybdopterin binding domain	GO:0042128	nitrate assimilation	--	--	--	--	--	--
c1003_g1	SC	2.00	1.32	329	--	--	--	--	--	--	--	--	--	--	--	--	--	--	--	--	--	--	--	--	--	--	--	--	--	--	--	--
c100400_g1	SC	4.00	16.92	222	676475592	XP_009060521.1	152	1.69808e-10	hypothetical protein LOTGIDRAFT_219002 [Lottia gigantea]>gi|556100199|gb|ESO88851.1| hypothetical protein LOTGIDRAFT_219002 [Lottia gigantea]	--	--	--	--	--	--	--	--	--	--	--	--	--	PF05269	Bacteriophage CII protein	GO:0006355	regulation of transcription, DNA-templated	GO:0003677	DNA binding	--	--	--	--
c100401_g1	SC	3.00	3.32	284	--	--	--	--	--	--	--	--	--	--	--	--	--	--	--	--	--	--	--	--	--	--	--	--	--	--	--	--
c100402_g1	SC	1.00	2.37	243	260820942	XP_002605793.1	134	1.24649e-07	hypothetical protein BRAFLDRAFT_58591 [Branchiostoma floridae]>gi|229291128|gb|EEN61803.1| hypothetical protein BRAFLDRAFT_58591 [Branchiostoma floridae]	--	--	--	--	--	--	--	--	--	--	--	--	--	--	--	GO:0006810	transport	GO:0017111	nucleoside-triphosphatase activity	--	--	--	--
c100403_g1	SC	2.00	3.57	256	--	--	--	--	--	--	--	--	--	--	--	--	--	--	--	--	--	--	PF13414	TPR repeat	--	--	GO:0005515	protein binding	--	--	--	--
c100406_g1	SC	5.00	1.86	412	--	--	--	--	--	--	--	--	--	--	--	--	--	--	--	--	--	--	--	--	--	--	--	--	--	--	--	--
c100407_g1	SC	2.00	2.39	279	--	--	--	--	--	--	--	--	--	--	--	--	--	--	--	--	--	--	--	--	--	--	--	--	--	--	--	--
c100408_g1	SC	6.00	3.12	358	--	--	--	--	--	--	--	--	--	--	--	--	--	--	--	--	--	--	--	--	--	--	--	--	--	--	--	--
c100409_g1	SC	7.00	1.58	534	--	--	--	--	--	--	--	--	--	--	--	--	--	--	--	--	--	--	--	--	--	--	--	--	--	--	--	--
c10040_g1	SC	6.00	2.19	416	--	--	--	--	--	--	--	--	--	--	--	--	--	--	--	--	--	--	--	--	--	--	--	--	--	--	--	--
c100410_g1	SC	1.00	3.15	232	--	--	--	--	--	--	--	--	--	--	--	--	--	--	--	--	--	--	--	--	--	--	--	--	--	--	--	--
c100411_g1	SC	14.00	1.68	809	--	--	--	--	--	--	--	--	--	--	--	--	--	--	--	--	--	--	--	--	--	--	--	--	--	--	--	--
c100413_g1	SC	1.00	6.65	209	--	--	--	--	--	--	--	--	--	--	--	--	--	--	--	--	--	--	--	--	--	--	--	--	--	--	--	--
c100415_g1	SC	1.00	6.65	209	--	--	--	--	--	--	--	--	--	--	--	--	--	--	--	--	--	--	--	--	--	--	--	--	--	--	--	--
c100417_g1	SC	2.00	14.38	207	--	--	--	--	--	--	--	--	--	--	--	--	--	--	--	--	--	--	--	--	--	--	--	--	--	--	--	--
c100418_g1	SC	4.00	1.90	371	--	--	--	--	--	--	--	--	--	--	--	--	--	--	--	--	--	--	--	--	--	--	--	--	--	--	--	--
c100419_g1	SC	1.00	4.10	223	--	--	--	--	--	--	--	--	--	--	--	--	--	--	--	--	--	--	--	--	--	--	--	--	--	--	--	--
c10041_g1	SC	34.00	2.75	1192	565315656	ETE67494.1	545	2.9186e-61	Ornithine decarboxylase, partial [Ophiophagus hannah]	--	--	--	--	--	K01581	E4.1.1.17, ODC1, speC, speF	ornithine decarboxylase	http://www.genome.jp/dbget-bin/www_bget?ko:K01581	P27118	529	1.99101e-60	Ornithine decarboxylase (Fragment) OS=Gallus gallus GN=ODC1 PE=2 SV=1	PF02784//PF00278	Pyridoxal-dependent decarboxylase, pyridoxal binding domain//Pyridoxal-dependent decarboxylase, C-terminal sheet domain	--	--	GO:0003824	catalytic activity	--	--	KOG0622	Ornithine decarboxylase
c100420_g1	SC	1.00	1.79	256	--	--	--	--	--	--	--	--	--	--	--	--	--	--	--	--	--	--	--	--	--	--	--	--	--	--	--	--
c100421_g1	SC	2.00	5.80	235	--	--	--	--	--	--	--	--	--	--	--	--	--	--	--	--	--	--	--	--	--	--	--	--	--	--	--	--
c100423_g1	SC	1.00	8.82	202	--	--	--	--	--	--	--	--	--	--	--	--	--	--	--	--	--	--	--	--	--	--	--	--	--	--	--	--
c100425_g1	SC	1.00	1.86	254	--	--	--	--	--	--	--	--	--	--	--	--	--	--	--	--	--	--	--	--	--	--	--	--	--	--	--	--
c100426_g1	SC	4.00	2.02	362	--	--	--	--	--	--	--	--	--	--	--	--	--	--	--	--	--	--	--	--	--	--	--	--	--	--	--	--
c100427_g1	SC	2.00	1.09	352	--	--	--	--	--	--	--	--	--	--	--	--	--	--	--	--	--	--	--	--	--	--	--	--	--	--	--	--
c100428_g1	SC	2.00	1.10	350	--	--	--	--	--	--	--	--	--	--	--	--	--	--	--	--	--	--	--	--	--	--	--	--	--	--	--	--
c100429_g1	SC	1.00	3.63	227	--	--	--	--	--	--	--	--	--	--	--	--	--	--	--	--	--	--	--	--	--	--	--	--	--	--	--	--
c10042_g1	SC	9.00	11.25	276	--	--	--	--	--	--	--	--	--	--	--	--	--	--	--	--	--	--	--	--	--	--	--	--	--	--	--	--
c100430_g1	SC	5.00	3.15	334	780031693	XP_011666777.1	398	4.56661e-42	PREDICTED: usherin [Strongylocentrotus purpuratus]	--	--	--	--	--	--	--	--	--	O75445	250	9.86919e-24	Usherin OS=Homo sapiens GN=USH2A PE=1 SV=3	PF00041//PF16656	Fibronectin type III domain//Purple acid Phosphatase, N-terminal domain	GO:0019497//GO:0006771	hexachlorocyclohexane metabolic process//riboflavin metabolic process	GO:0046872//GO:0003993//GO:0005515	metal ion binding//acid phosphatase activity//protein binding	--	--	--	--
c100431_g1	SC	3.00	3.64	278	--	--	--	--	--	--	--	--	--	--	--	--	--	--	--	--	--	--	--	--	--	--	--	--	--	--	--	--
c100432_g1	SC	3.00	3.28	285	--	--	--	--	--	--	--	--	--	--	--	--	--	--	--	--	--	--	--	--	--	--	--	--	--	--	--	--
c100433_g1	SC	79.00	13.45	636	--	--	--	--	--	--	--	--	--	--	--	--	--	--	--	--	--	--	--	--	--	--	--	--	--	--	--	--
c100434_g1	SC	4.00	3.87	294	--	--	--	--	--	--	--	--	--	--	--	--	--	--	--	--	--	--	--	--	--	--	--	--	--	--	--	--
c100435_g1	SC	3.00	1.70	347	--	--	--	--	--	--	--	--	--	--	--	--	--	--	--	--	--	--	--	--	--	--	--	--	--	--	--	--
c100436_g1	SC	3.00	2.79	297	--	--	--	--	--	--	--	--	--	--	--	--	--	--	--	--	--	--	--	--	--	--	--	--	--	--	--	--
c100437_g1	SC	2.00	5.51	237	--	--	--	--	--	--	--	--	--	--	--	--	--	--	--	--	--	--	--	--	--	--	--	--	--	--	--	--
c100438_g1	SC	1.00	3.97	224	--	--	--	--	--	--	--	--	--	--	--	--	--	--	--	--	--	--	--	--	--	--	--	--	--	--	--	--
c10043_g1	SC	18.00	2.31	772	--	--	--	--	--	--	--	--	--	--	--	--	--	--	--	--	--	--	--	--	--	--	--	--	--	--	--	--
c100440_g1	SC	3.00	7.85	239	--	--	--	--	--	--	--	--	--	--	--	--	--	--	--	--	--	--	--	--	--	--	--	--	--	--	--	--
c100441_g1	SC	3.00	4.86	261	--	--	--	--	--	--	--	--	--	--	--	--	--	--	--	--	--	--	--	--	--	--	--	--	--	--	--	--
c100442_g1	SC	1.00	7.79	205	--	--	--	--	--	--	--	--	--	--	--	--	--	--	--	--	--	--	--	--	--	--	--	--	--	--	--	--
c100443_g1	SC	1.00	3.85	225	--	--	--	--	--	--	--	--	--	--	--	--	--	--	--	--	--	--	--	--	--	--	--	--	--	--	--	--
c100444_g1	SC	2.00	3.50	257	--	--	--	--	--	--	--	--	--	--	--	--	--	--	--	--	--	--	PF03567	Sulfotransferase family	--	--	GO:0008146	sulfotransferase activity	GO:0016021	integral component of membrane	--	--
c100445_g1	SC	2.00	2.54	275	--	--	--	--	--	--	--	--	--	--	--	--	--	--	--	--	--	--	--	--	--	--	--	--	--	--	--	--
c100446_g1	SC	1.00	3.63	227	--	--	--	--	--	--	--	--	--	--	--	--	--	--	--	--	--	--	PF13855//PF00560	Leucine rich repeat//Leucine Rich Repeat	--	--	GO:0005515	protein binding	--	--	--	--
c100447_g1	SC	1.00	6.17	211	--	--	--	--	--	--	--	--	--	--	--	--	--	--	--	--	--	--	--	--	--	--	--	--	--	--	--	--
c100449_g1	SC	2.00	2.58	274	--	--	--	--	--	--	--	--	--	--	--	--	--	--	--	--	--	--	--	--	--	--	--	--	--	--	--	--
c10044_g1	SC	4.00	2.08	358	--	--	--	--	--	--	--	--	--	--	--	--	--	--	--	--	--	--	--	--	--	--	--	--	--	--	--	--
c100450_g1	SC	4.00	2.10	357	--	--	--	--	--	--	--	--	--	--	--	--	--	--	--	--	--	--	--	--	--	--	--	--	--	--	--	--
c100451_g1	SC	4.00	3.13	312	--	--	--	--	--	--	--	--	--	--	--	--	--	--	--	--	--	--	--	--	--	--	--	--	--	--	--	--
c100452_g1	SC	5.00	8.10	261	--	--	--	--	--	--	--	--	--	--	--	--	--	--	--	--	--	--	--	--	--	--	--	--	--	--	--	--
c100453_g1	SC	5.00	5.46	285	--	--	--	--	--	--	--	--	--	--	--	--	--	--	--	--	--	--	--	--	--	--	--	--	--	--	--	--
c100454_g1	SC	1.00	8.45	203	--	--	--	--	--	--	--	--	--	--	--	--	--	--	--	--	--	--	--	--	--	--	--	--	--	--	--	--
c100455_g1	SC	1.00	1.75	257	--	--	--	--	--	--	--	--	--	--	--	--	--	--	--	--	--	--	--	--	--	--	--	--	--	--	--	--
c100456_g1	SC	2.00	1.98	292	780142105	XP_011680802.1	271	1.96865e-25	PREDICTED: LOW QUALITY PROTEIN: sperm flagellar protein 2 [Strongylocentrotus purpuratus]	--	--	--	--	--	--	--	--	--	Q2IA00	192	2.63177e-16	Sperm flagellar protein 2 OS=Sus scrofa GN=SPEF2 PE=2 SV=1	--	--	--	--	--	--	--	--	--	--
c100458_g1	SC	4.00	3.46	303	--	--	--	--	--	--	--	--	--	--	--	--	--	--	--	--	--	--	--	--	--	--	--	--	--	--	--	--
c100459_g1	SC	1.00	7.19	207	--	--	--	--	--	--	--	--	--	--	--	--	--	--	--	--	--	--	--	--	--	--	--	--	--	--	--	--
c10045_g1	SC	70.00	6.40	1033	--	--	--	--	--	--	--	--	--	--	--	--	--	--	--	--	--	--	--	--	--	--	--	--	--	--	--	--
c100460_g1	SC	2.00	14.96	206	--	--	--	--	--	--	--	--	--	--	--	--	--	--	--	--	--	--	--	--	--	--	--	--	--	--	--	--
c100461_g1	SC	1.00	6.17	211	--	--	--	--	--	--	--	--	--	--	--	--	--	--	--	--	--	--	--	--	--	--	--	--	--	--	--	--
c100462_g1	SC	2.00	11.07	214	780040283	XP_011667978.1	292	1.11738e-28	PREDICTED: LOW QUALITY PROTEIN: fatty acid synthase-like [Strongylocentrotus purpuratus]	--	--	--	--	--	K00665	FASN	fatty acid synthase, animal type	http://www.genome.jp/dbget-bin/www_bget?ko:K00665	P12276	246	6.46622e-24	Fatty acid synthase OS=Gallus gallus GN=FASN PE=1 SV=5	--	--	--	--	--	--	--	--	KOG1202	Animal-type fatty acid synthase and related proteins
c100463_g1	SC	5.00	6.67	272	--	--	--	--	--	--	--	--	--	--	--	--	--	--	--	--	--	--	--	--	--	--	--	--	--	--	--	--
c100464_g1	SC	3.00	3.53	280	--	--	--	--	--	--	--	--	--	--	--	--	--	--	--	--	--	--	--	--	--	--	--	--	--	--	--	--
c100465_g1	SC	3.00	2.90	294	--	--	--	--	--	--	--	--	--	--	--	--	--	--	--	--	--	--	--	--	--	--	--	--	--	--	--	--
c100467_g1	SC	2.00	18.41	201	--	--	--	--	--	--	--	--	--	--	--	--	--	--	--	--	--	--	--	--	--	--	--	--	--	--	--	--
c100468_g1	SC	3.00	2.72	299	--	--	--	--	--	--	--	--	--	--	--	--	--	--	--	--	--	--	PF12515	Ca2+-ATPase N terminal autoinhibitory domain	--	--	GO:0005516	calmodulin binding	--	--	--	--
c100469_g1	SC	11.00	1.82	647	--	--	--	--	--	--	--	--	--	--	--	--	--	--	--	--	--	--	--	--	--	--	--	--	--	--	--	--
c10046_g1	SC	26.00	2.06	1110	--	--	--	--	--	685042453	LN590978.1	34	6.20388e-06	Cyprinus carpio genome assembly common carp genome ,scaffold 000001016	--	--	--	--	--	--	--	--	--	--	--	--	--	--	--	--	--	--
c100470_g1	SC	4.00	4.25	287	--	--	--	--	--	--	--	--	--	--	--	--	--	--	--	--	--	--	--	--	--	--	--	--	--	--	--	--
c100471_g1	SC	5.00	1.79	419	--	--	--	--	--	--	--	--	--	--	--	--	--	--	--	--	--	--	PF02599	Global regulator protein family	GO:0006402//GO:0006109	mRNA catabolic process//regulation of carbohydrate metabolic process	GO:0003723	RNA binding	--	--	--	--
c100472_g1	SC	1.00	8.82	202	--	--	--	--	--	--	--	--	--	--	--	--	--	--	--	--	--	--	--	--	--	--	--	--	--	--	--	--
c100474_g1	SC	5.00	1.79	419	--	--	--	--	--	--	--	--	--	--	--	--	--	--	--	--	--	--	--	--	--	--	--	--	--	--	--	--
c100475_g1	SC	4.00	12.94	231	--	--	--	--	--	--	--	--	--	--	--	--	--	--	--	--	--	--	--	--	--	--	--	--	--	--	--	--
c100477_g1	SC	2.00	3.30	260	--	--	--	--	--	--	--	--	--	--	--	--	--	--	--	--	--	--	--	--	--	--	--	--	--	--	--	--
c100478_g1	SC	1.00	4.99	217	--	--	--	--	--	--	--	--	--	--	--	--	--	--	--	--	--	--	PF03092	BT1 family	GO:0006810	transport	--	--	GO:0016021	integral component of membrane	--	--
c100479_g1	SC	6.00	3.07	360	--	--	--	--	--	--	--	--	--	--	--	--	--	--	--	--	--	--	PF05472	DNA replication terminus site-binding protein (Ter protein)	GO:0006274	DNA replication termination	GO:0003677	DNA binding	GO:0005737	cytoplasm	--	--
c10047_g1	SC	27.00	2.69	929	47550975	NP_999661.1	423	1.27935e-42	dystrophin-like protein [Strongylocentrotus purpuratus]>gi|13377398|gb|AAK20664.1|AF304204_1 dystrophin-like protein [Strongylocentrotus purpuratus]	--	--	--	--	--	K10366	DMD	dystrophin	http://www.genome.jp/dbget-bin/www_bget?ko:K10366	Q5GN48	251	7.67349e-22	Dystrophin OS=Sus scrofa GN=DMD PE=1 SV=1	PF08653//PF08702//PF06009//PF09177//PF02388//PF01244//PF00435//PF07361//PF05531	DASH complex subunit Dam1//Fibrinogen alpha/beta chain family//Laminin Domain II//Syntaxin 6, N-terminal//FemAB family//Membrane dipeptidase (Peptidase family M19)//Spectrin repeat//Cytochrome b562//Nucleopolyhedrovirus P10 protein	GO:0051258//GO:0006118//GO:0007155//GO:0007165//GO:0030168//GO:0022900//GO:0048193//GO:0006508//GO:0008608//GO:0009252	protein polymerization//obsolete electron transport//cell adhesion//signal transduction//platelet activation//electron transport chain//Golgi vesicle transport//proteolysis//attachment of spindle microtubules to kinetochore//peptidoglycan biosynthetic process	GO:0020037//GO:0016755//GO:0009055//GO:0030674//GO:0005102//GO:0005515//GO:0005506//GO:0016805	heme binding//transferase activity, transferring amino-acyl groups//electron carrier activity//protein binding, bridging//receptor binding//protein binding//iron ion binding//dipeptidase activity	GO:0042597//GO:0005577//GO:0072686//GO:0016020//GO:0019028//GO:0042729	periplasmic space//fibrinogen complex//mitotic spindle//membrane//viral capsid//DASH complex	--	--
c100480_g1	SC	2.00	3.30	260	--	--	--	--	--	--	--	--	--	--	--	--	--	--	--	--	--	--	--	--	--	--	--	--	--	--	--	--
c100482_g1	SC	6.00	7.74	274	--	--	--	--	--	--	--	--	--	--	--	--	--	--	--	--	--	--	--	--	--	--	--	--	--	--	--	--
c100484_g1	SC	1.00	8.45	203	--	--	--	--	--	--	--	--	--	--	--	--	--	--	--	--	--	--	--	--	--	--	--	--	--	--	--	--
c100486_g1	SC	2.00	8.74	221	--	--	--	--	--	--	--	--	--	--	--	--	--	--	--	--	--	--	--	--	--	--	--	--	--	--	--	--
c100487_g1	SC	1.00	2.37	243	--	--	--	--	--	--	--	--	--	--	--	--	--	--	--	--	--	--	--	--	--	--	--	--	--	--	--	--
c100488_g1	SC	1.00	4.66	219	--	--	--	--	--	--	--	--	--	--	--	--	--	--	--	--	--	--	--	--	--	--	--	--	--	--	--	--
c100489_g1	SC	3.00	7.47	241	--	--	--	--	--	--	--	--	--	--	--	--	--	--	--	--	--	--	--	--	--	--	--	--	--	--	--	--
c10048_g1	SC	71.00	12.67	617	--	--	--	--	--	--	--	--	--	--	--	--	--	--	--	--	--	--	--	--	--	--	--	--	--	--	--	--
c100491_g1	SC	3.00	4.86	261	--	--	--	--	--	--	--	--	--	--	--	--	--	--	--	--	--	--	--	--	--	--	--	--	--	--	--	--
c100492_g1	SC	2.00	8.46	222	--	--	--	--	--	--	--	--	--	--	--	--	--	--	--	--	--	--	--	--	--	--	--	--	--	--	--	--
c100494_g1	SC	2.00	14.38	207	--	--	--	--	--	--	--	--	--	--	--	--	--	--	--	--	--	--	--	--	--	--	--	--	--	--	--	--
c100495_g1	SC	2.00	14.38	207	--	--	--	--	--	--	--	--	--	--	--	--	--	--	--	--	--	--	--	--	--	--	--	--	--	--	--	--
c100496_g1	SC	1.00	2.49	241	--	--	--	--	--	--	--	--	--	--	--	--	--	--	--	--	--	--	--	--	--	--	--	--	--	--	--	--
c100497_g1	SC	2.00	1.82	299	--	--	--	--	--	--	--	--	--	--	--	--	--	--	--	--	--	--	--	--	--	--	--	--	--	--	--	--
c100498_g1	SC	1.00	3.15	232	--	--	--	--	--	--	--	--	--	--	--	--	--	--	--	--	--	--	--	--	--	--	--	--	--	--	--	--
c100499_g1	SC	1.00	5.34	215	353742764	AER22700.1	247	1.2755e-22	polyketide synthase 2, partial [Strongylocentrotus purpuratus]	--	--	--	--	--	--	--	--	--	--	--	--	--	--	--	--	--	--	--	--	--	--	--
c10049_g1	SC	109.00	5.95	1511	677388313	KFQ08542.1	1597	0	Glycylpeptide N-tetradecanoyltransferase 1, partial [Haliaeetus albicilla]	736242395	XM_010786998.1	104	1.03996e-44	PREDICTED: Notothenia coriiceps N-myristoyltransferase 2 (nmt2), mRNA	K00671	E2.3.1.97, NMT	glycylpeptide N-tetradecanoyltransferase	http://www.genome.jp/dbget-bin/www_bget?ko:K00671	O70310	1580	0	Glycylpeptide N-tetradecanoyltransferase 1 OS=Mus musculus GN=Nmt1 PE=1 SV=1	PF02799//PF13508//PF01233//PF03708	Myristoyl-CoA:protein N-myristoyltransferase, C-terminal domain//Acetyltransferase (GNAT) domain//Myristoyl-CoA:protein N-myristoyltransferase, N-terminal domain//Avian retrovirus envelope protein, gp85	GO:0042967	acyl-carrier-protein biosynthetic process	GO:0004379//GO:0008080	glycylpeptide N-tetradecanoyltransferase activity//N-acetyltransferase activity	GO:0019031	viral envelope	KOG2779	N-myristoyl transferase
c1004_g1	SC	34.00	3.39	929	405970652	EKC35540.1	196	4.37147e-14	hypothetical protein CGI_10005164 [Crassostrea gigas]	--	--	--	--	--	--	--	--	--	--	--	--	--	--	--	--	--	--	--	--	--	--	--
c100500_g1	SC	1.00	5.34	215	--	--	--	--	--	--	--	--	--	--	--	--	--	--	--	--	--	--	--	--	--	--	--	--	--	--	--	--
c100501_g1	SC	1.00	7.79	205	--	--	--	--	--	--	--	--	--	--	--	--	--	--	--	--	--	--	--	--	--	--	--	--	--	--	--	--
c100502_g1	SC	6.00	7.05	280	--	--	--	--	--	--	--	--	--	--	--	--	--	--	--	--	--	--	--	--	--	--	--	--	--	--	--	--
c100503_g1	SC	1.00	7.19	207	--	--	--	--	--	--	--	--	--	--	--	--	--	--	--	--	--	--	--	--	--	--	--	--	--	--	--	--
c100504_g1	SC	3.00	8.94	234	--	--	--	--	--	--	--	--	--	--	--	--	--	--	--	--	--	--	--	--	--	--	--	--	--	--	--	--
c100506_g1	SC	1.00	7.19	207	--	--	--	--	--	--	--	--	--	--	--	--	--	--	--	--	--	--	--	--	--	--	--	--	--	--	--	--
c100508_g1	SC	1.00	7.79	205	--	--	--	--	--	--	--	--	--	--	--	--	--	--	--	--	--	--	--	--	--	--	--	--	--	--	--	--
c100509_g1	SC	1.00	5.95	212	--	--	--	--	--	--	--	--	--	--	--	--	--	--	--	--	--	--	--	--	--	--	--	--	--	--	--	--
c100510_g1	SC	4.00	7.00	257	--	--	--	--	--	--	--	--	--	--	--	--	--	--	--	--	--	--	--	--	--	--	--	--	--	--	--	--
c100511_g1	SC	2.00	6.47	231	--	--	--	--	--	--	--	--	--	--	--	--	--	--	--	--	--	--	--	--	--	--	--	--	--	--	--	--
c100512_g1	SC	1.00	3.85	225	--	--	--	--	--	--	--	--	--	--	--	--	--	--	--	--	--	--	--	--	--	--	--	--	--	--	--	--
c100513_g1	SC	7.00	3.69	356	--	--	--	--	--	--	--	--	--	--	--	--	--	--	--	--	--	--	--	--	--	--	--	--	--	--	--	--
c100514_g1	SC	1.00	8.82	202	--	--	--	--	--	--	--	--	--	--	--	--	--	--	--	--	--	--	--	--	--	--	--	--	--	--	--	--
c100515_g1	SC	5.00	8.93	256	--	--	--	--	--	--	--	--	--	--	--	--	--	--	--	--	--	--	--	--	--	--	--	--	--	--	--	--
c100516_g1	SC	11.00	7.40	327	--	--	--	--	--	--	--	--	--	--	--	--	--	--	--	--	--	--	--	--	--	--	--	--	--	--	--	--
c100517_g1	SC	1.00	1.59	262	--	--	--	--	--	--	--	--	--	--	--	--	--	--	--	--	--	--	--	--	--	--	--	--	--	--	--	--
c100518_g1	SC	8.00	3.49	384	--	--	--	--	--	--	--	--	--	--	--	--	--	--	--	--	--	--	--	--	--	--	--	--	--	--	--	--
c100519_g1	SC	4.00	2.74	325	--	--	--	--	--	--	--	--	--	--	--	--	--	--	--	--	--	--	--	--	--	--	--	--	--	--	--	--
c10051_g1	SC	9.00	1.42	670	--	--	--	--	--	--	--	--	--	--	--	--	--	--	--	--	--	--	--	--	--	--	--	--	--	--	--	--
c100520_g1	SC	1.00	1.82	255	--	--	--	--	--	--	--	--	--	--	--	--	--	--	--	--	--	--	--	--	--	--	--	--	--	--	--	--
c100521_g1	SC	2.00	11.07	214	--	--	--	--	--	--	--	--	--	--	--	--	--	--	--	--	--	--	--	--	--	--	--	--	--	--	--	--
c100522_g1	SC	4.00	14.10	228	--	--	--	--	--	--	--	--	--	--	--	--	--	--	--	--	--	--	--	--	--	--	--	--	--	--	--	--
c100523_g1	SC	2.00	4.75	243	--	--	--	--	--	--	--	--	--	--	--	--	--	--	--	--	--	--	--	--	--	--	--	--	--	--	--	--
c100524_g1	SC	4.00	5.81	267	780038035	XP_011667675.1	191	4.49276e-15	PREDICTED: transmembrane channel-like protein 7 [Strongylocentrotus purpuratus]	--	--	--	--	--	--	--	--	--	Q4R7U0	122	2.26519e-07	Transmembrane channel-like protein 7 OS=Macaca fascicularis GN=TMC7 PE=2 SV=1	--	--	--	--	--	--	--	--	--	--
c100525_g1	SC	3.00	2.32	313	--	--	--	--	--	--	--	--	--	--	--	--	--	--	--	--	--	--	--	--	--	--	--	--	--	--	--	--
c100526_g1	SC	3.00	3.75	276	340372463	XP_003384763.1	185	1.66719e-14	PREDICTED: diphthamide biosynthesis protein 2-like [Amphimedon queenslandica]	--	--	--	--	--	K17866	DPH2	diphthamide biosynthesis protein 2	http://www.genome.jp/dbget-bin/www_bget?ko:K17866	A4QN59	170	6.85998e-14	Diphthamide biosynthesis protein 2 OS=Danio rerio GN=dph2 PE=2 SV=1	--	--	--	--	--	--	--	--	KOG2648	Diphthamide biosynthesis protein
c100527_g1	SC	3.00	4.21	269	--	--	--	--	--	--	--	--	--	--	--	--	--	--	--	--	--	--	--	--	--	--	--	--	--	--	--	--
c100528_g1	SC	1.00	1.53	264	--	--	--	--	--	--	--	--	--	--	--	--	--	--	--	--	--	--	--	--	--	--	--	--	--	--	--	--
c100529_g1	SC	4.00	1.86	374	--	--	--	--	--	--	--	--	--	--	--	--	--	--	--	--	--	--	PF00507	NADH-ubiquinone/plastoquinone oxidoreductase, chain 3	GO:0006814//GO:0055114//GO:0006120//GO:0006744//GO:0015992	sodium ion transport//oxidation-reduction process//mitochondrial electron transport, NADH to ubiquinone//ubiquinone biosynthetic process//proton transport	GO:0008137	NADH dehydrogenase (ubiquinone) activity	--	--	--	--
c10052_g1	SC	41.00	3.00	1184	780135507	XP_011679916.1	611	2.38774e-72	PREDICTED: uncharacterized protein LOC105445727, partial [Strongylocentrotus purpuratus]	--	--	--	--	--	--	--	--	--	--	--	--	--	PF01983	Guanylyl transferase CofC like	--	--	GO:0016779	nucleotidyltransferase activity	--	--	--	--
c100530_g1	SC	1.00	1.08	286	260666139	ACX47908.1	477	2.44804e-58	adenylsuccinate lyase, partial [Phasianus colchicus]	--	--	--	--	--	K01756	purB, ADSL	adenylosuccinate lyase	http://www.genome.jp/dbget-bin/www_bget?ko:K01756	P21265	482	1.26541e-57	Adenylosuccinate lyase OS=Gallus gallus GN=ADSL PE=2 SV=2	--	--	--	--	--	--	--	--	KOG2700	Adenylosuccinate lyase
c100532_g1	SC	8.00	4.16	358	--	--	--	--	--	--	--	--	--	--	--	--	--	--	--	--	--	--	--	--	--	--	--	--	--	--	--	--
c100533_g1	SC	2.00	1.82	299	390357925	XP_799976.2	186	3.40862e-15	PREDICTED: uncharacterized protein LOC577943 [Strongylocentrotus purpuratus]	--	--	--	--	--	--	--	--	--	--	--	--	--	--	--	--	--	--	--	--	--	--	--
c100534_g1	SC	3.00	3.64	278	--	--	--	--	--	--	--	--	--	--	--	--	--	--	--	--	--	--	--	--	--	--	--	--	--	--	--	--
c100535_g1	SC	7.00	7.87	283	--	--	--	--	--	--	--	--	--	--	--	--	--	--	--	--	--	--	--	--	--	--	--	--	--	--	--	--
c100536_g1	SC	4.00	1.80	379	--	--	--	--	--	--	--	--	--	--	--	--	--	--	--	--	--	--	--	--	--	--	--	--	--	--	--	--
c100538_g1	SC	1.00	4.23	222	--	--	--	--	--	--	--	--	--	--	--	--	--	--	--	--	--	--	--	--	--	--	--	--	--	--	--	--
c100539_g1	SC	3.00	8.71	235	--	--	--	--	--	--	--	--	--	--	--	--	--	--	--	--	--	--	--	--	--	--	--	--	--	--	--	--
c10053_g1	SC	11.00	4.44	397	--	--	--	--	--	--	--	--	--	--	--	--	--	--	--	--	--	--	--	--	--	--	--	--	--	--	--	--
c100540_g1	SC	1.00	3.53	228	--	--	--	--	--	--	--	--	--	--	--	--	--	--	--	--	--	--	PF12201	Bcl2-interacting killer, BH3-domain containing	GO:0006915	apoptotic process	--	--	--	--	--	--
c100541_g1	SC	3.00	3.19	287	--	--	--	--	--	--	--	--	--	--	--	--	--	--	--	--	--	--	--	--	--	--	--	--	--	--	--	--
c100542_g1	SC	1.00	5.16	216	--	--	--	--	--	--	--	--	--	--	--	--	--	--	--	--	--	--	--	--	--	--	--	--	--	--	--	--
c100543_g1	SC	3.00	5.15	258	--	--	--	--	--	--	--	--	--	--	--	--	--	--	--	--	--	--	--	--	--	--	--	--	--	--	--	--
c100544_g1	SC	4.00	2.44	338	--	--	--	--	--	--	--	--	--	--	--	--	--	--	--	--	--	--	--	--	--	--	--	--	--	--	--	--
c100545_g1	SC	1.00	4.66	219	--	--	--	--	--	--	--	--	--	--	--	--	--	--	--	--	--	--	--	--	--	--	--	--	--	--	--	--
c100547_g1	SC	1.00	3.85	225	390355197	XP_003728495.1	199	2.13067e-16	PREDICTED: ankyrin and armadillo repeat-containing protein isoform X2 [Strongylocentrotus purpuratus]	--	--	--	--	--	--	--	--	--	--	--	--	--	PF00023//PF13606	Ankyrin repeat//Ankyrin repeat	--	--	GO:0005515	protein binding	--	--	--	--
c100548_g1	SC	8.00	2.64	436	--	--	--	--	--	--	--	--	--	--	--	--	--	--	--	--	--	--	--	--	--	--	--	--	--	--	--	--
c100549_g1	SC	5.00	3.71	317	--	--	--	--	--	--	--	--	--	--	--	--	--	--	--	--	--	--	--	--	--	--	--	--	--	--	--	--
c10054_g1	SC	1.00	1.94	252	--	--	--	--	--	--	--	--	--	--	--	--	--	--	--	--	--	--	--	--	--	--	--	--	--	--	--	--
c100550_g1	SC	6.00	2.20	415	780145220	XP_011681226.1	197	3.36986e-15	PREDICTED: uncharacterized protein LOC100891346 [Strongylocentrotus purpuratus]	--	--	--	--	--	--	--	--	--	--	--	--	--	--	--	--	--	--	--	--	--	--	--
c100553_g1	SC	173.00	81.02	373	--	--	--	--	--	--	--	--	--	--	--	--	--	--	--	--	--	--	--	--	--	--	--	--	--	--	--	--
c100554_g1	SC	1.00	4.37	221	--	--	--	--	--	--	--	--	--	--	--	--	--	--	--	--	--	--	--	--	--	--	--	--	--	--	--	--
c100555_g1	SC	2.00	11.89	212	--	--	--	--	--	--	--	--	--	--	--	--	--	--	--	--	--	--	--	--	--	--	--	--	--	--	--	--
c100556_g1	SC	1.00	1.56	263	115898439	XP_786049.2	326	1.14452e-34	PREDICTED: WD repeat-containing protein 92 [Strongylocentrotus purpuratus]	--	--	--	--	--	--	--	--	--	Q29RZ9	306	3.22024e-33	WD repeat-containing protein 92 OS=Bos taurus GN=WDR92 PE=2 SV=1	PF02905//PF00400	Epstein Barr virus nuclear antigen-1, DNA-binding domain//WD domain, G-beta repeat	GO:0006275//GO:0045893//GO:0006260	regulation of DNA replication//positive regulation of transcription, DNA-templated//DNA replication	GO:0003688//GO:0003677//GO:0005515	DNA replication origin binding//DNA binding//protein binding	GO:0042025//GO:0046809	host cell nucleus//replication compartment	--	--
c100558_g1	SC	22.00	2.57	824	761902562	XP_011409551.1	338	3.05216e-33	PREDICTED: N-acetylgalactosamine-6-sulfatase-like [Amphimedon queenslandica]	--	--	--	--	--	K01132	GALNS	N-acetylgalactosamine-6-sulfatase	http://www.genome.jp/dbget-bin/www_bget?ko:K01132	Q32KH5	300	1.85505e-29	N-acetylgalactosamine-6-sulfatase OS=Canis familiaris GN=GALNS PE=2 SV=1	PF02117	Serpentine type 7TM GPCR chemoreceptor Sra	GO:0007186//GO:0007606	G-protein coupled receptor signaling pathway//sensory perception of chemical stimulus	GO:0004930	G-protein coupled receptor activity	GO:0016021	integral component of membrane	--	--
c100559_g1	SC	3.00	2.04	326	--	--	--	--	--	--	--	--	--	--	--	--	--	--	--	--	--	--	--	--	--	--	--	--	--	--	--	--
c10055_g1	SC	5.00	1.33	488	--	--	--	--	--	--	--	--	--	--	--	--	--	--	--	--	--	--	--	--	--	--	--	--	--	--	--	--
c10055_g2	SC	4.00	1.55	404	780178144	XP_011661640.1	412	1.60853e-45	PREDICTED: extracellular serine/threonine protein kinase FAM20C [Strongylocentrotus purpuratus]	--	--	--	--	--	--	--	--	--	Q8IXL6	235	5.47245e-22	Extracellular serine/threonine protein kinase FAM20C OS=Homo sapiens GN=FAM20C PE=1 SV=2	--	--	--	--	--	--	--	--	KOG3829	Uncharacterized conserved protein
c100561_g1	SC	2.00	18.41	201	--	--	--	--	--	--	--	--	--	--	--	--	--	--	--	--	--	--	--	--	--	--	--	--	--	--	--	--
c100562_g1	SC	4.00	23.79	212	--	--	--	--	--	--	--	--	--	--	--	--	--	--	--	--	--	--	--	--	--	--	--	--	--	--	--	--
c100563_g1	SC	2.00	1.84	298	--	--	--	--	--	--	--	--	--	--	--	--	--	--	--	--	--	--	--	--	--	--	--	--	--	--	--	--
c100564_g1	SC	2.00	0.67	432	--	--	--	--	--	--	--	--	--	--	--	--	--	--	--	--	--	--	--	--	--	--	--	--	--	--	--	--
c100566_g1	SC	2.00	2.18	285	--	--	--	--	--	--	--	--	--	--	--	--	--	--	--	--	--	--	--	--	--	--	--	--	--	--	--	--
c100567_g1	SC	1.00	3.97	224	--	--	--	--	--	--	--	--	--	--	--	--	--	--	--	--	--	--	--	--	--	--	--	--	--	--	--	--
c100568_g1	SC	2.00	2.54	275	--	--	--	--	--	--	--	--	--	--	--	--	--	--	--	--	--	--	--	--	--	--	--	--	--	--	--	--
c100569_g1	SC	5.00	5.54	284	--	--	--	--	--	--	--	--	--	--	--	--	--	--	--	--	--	--	--	--	--	--	--	--	--	--	--	--
c10056_g1	SC	5.00	2.18	384	--	--	--	--	--	--	--	--	--	--	--	--	--	--	--	--	--	--	--	--	--	--	--	--	--	--	--	--
c100571_g1	SC	4.00	4.70	280	--	--	--	--	--	--	--	--	--	--	--	--	--	--	--	--	--	--	--	--	--	--	--	--	--	--	--	--
c100572_g1	SC	1.00	2.43	242	--	--	--	--	--	--	--	--	--	--	--	--	--	--	--	--	--	--	--	--	--	--	--	--	--	--	--	--
c100573_g1	SC	5.00	3.00	340	--	--	--	--	--	--	--	--	--	--	--	--	--	--	--	--	--	--	--	--	--	--	--	--	--	--	--	--
c100574_g1	SC	1.00	8.11	204	--	--	--	--	--	--	--	--	--	--	--	--	--	--	--	--	--	--	--	--	--	--	--	--	--	--	--	--
c100575_g1	SC	2.00	10.68	215	--	--	--	--	--	--	--	--	--	--	--	--	--	--	--	--	--	--	--	--	--	--	--	--	--	--	--	--
c100576_g1	SC	2.00	11.47	213	--	--	--	--	--	--	--	--	--	--	--	--	--	--	--	--	--	--	--	--	--	--	--	--	--	--	--	--
c100578_g1	SC	1.00	4.82	218	--	--	--	--	--	--	--	--	--	--	--	--	--	--	--	--	--	--	--	--	--	--	--	--	--	--	--	--
c100579_g1	SC	2.00	9.97	217	--	--	--	--	--	--	--	--	--	--	--	--	--	--	--	--	--	--	--	--	--	--	--	--	--	--	--	--
c10057_g1	SC	36.00	3.77	894	390364063	XP_003730514.1	391	3.68475e-41	PREDICTED: uncharacterized protein LOC576218 [Strongylocentrotus purpuratus]	--	--	--	--	--	--	--	--	--	--	--	--	--	PF01475	Ferric uptake regulator family	GO:0006355	regulation of transcription, DNA-templated	GO:0003700	transcription factor activity, sequence-specific DNA binding	GO:0005667	transcription factor complex	--	--
c100580_g1	SC	2.00	8.74	221	--	--	--	--	--	--	--	--	--	--	--	--	--	--	--	--	--	--	--	--	--	--	--	--	--	--	--	--
c100582_g1	SC	4.00	2.74	325	--	--	--	--	--	--	--	--	--	--	--	--	--	--	--	--	--	--	--	--	--	--	--	--	--	--	--	--
c100583_g1	SC	1.00	6.17	211	--	--	--	--	--	--	--	--	--	--	--	--	--	--	--	--	--	--	PF03600//PF04258//PF01080	Citrate transporter//Signal peptide peptidase//Presenilin	GO:0055085	transmembrane transport	GO:0004190	aspartic-type endopeptidase activity	GO:0016021	integral component of membrane	--	--
c100584_g1	SC	2.00	3.01	265	--	--	--	--	--	--	--	--	--	--	--	--	--	--	--	--	--	--	--	--	--	--	--	--	--	--	--	--
c100586_g1	SC	2.00	1.69	305	--	--	--	--	--	--	--	--	--	--	--	--	--	--	--	--	--	--	--	--	--	--	--	--	--	--	--	--
c100587_g1	SC	1.00	6.91	208	--	--	--	--	--	--	--	--	--	--	--	--	--	--	--	--	--	--	--	--	--	--	--	--	--	--	--	--
c100589_g1	SC	3.00	15.48	216	--	--	--	--	--	--	--	--	--	--	--	--	--	--	--	--	--	--	--	--	--	--	--	--	--	--	--	--
c100590_g1	SC	10.00	2.74	480	--	--	--	--	--	--	--	--	--	--	--	--	--	--	--	--	--	--	--	--	--	--	--	--	--	--	--	--
c100591_g1	SC	3.00	1.52	362	--	--	--	--	--	--	--	--	--	--	--	--	--	--	--	--	--	--	--	--	--	--	--	--	--	--	--	--
c100592_g1	SC	1.00	2.90	235	--	--	--	--	--	--	--	--	--	--	--	--	--	--	--	--	--	--	--	--	--	--	--	--	--	--	--	--
c100593_g1	SC	4.00	8.46	248	807026003	XP_004523993.2	189	1.30234e-15	PREDICTED: thymidylate synthase-like [Ceratitis capitata]	--	--	--	--	--	K00560	thyA, TYMS	thymidylate synthase	http://www.genome.jp/dbget-bin/www_bget?ko:K00560	O76511	178	1.45466e-15	Thymidylate synthase OS=Drosophila melanogaster GN=Ts PE=1 SV=2	PF00303	Thymidylate synthase	GO:0006206//GO:0006231	pyrimidine nucleobase metabolic process//dTMP biosynthetic process	GO:0004799	thymidylate synthase activity	--	--	KOG0673	Thymidylate synthase
c100594_g1	SC	3.00	3.10	289	--	--	--	--	--	--	--	--	--	--	--	--	--	--	--	--	--	--	--	--	--	--	--	--	--	--	--	--
c100595_g1	SC	1.00	5.34	215	--	--	--	--	--	--	--	--	--	--	--	--	--	--	--	--	--	--	PF02386	Cation transport protein	GO:0006812//GO:0055085	cation transport//transmembrane transport	GO:0008324	cation transmembrane transporter activity	--	--	--	--
c100596_g1	SC	11.00	3.35	454	--	--	--	--	--	--	--	--	--	--	--	--	--	--	--	--	--	--	--	--	--	--	--	--	--	--	--	--
c100597_g1	SC	3.00	3.42	282	--	--	--	--	--	--	--	--	--	--	--	--	--	--	--	--	--	--	--	--	--	--	--	--	--	--	--	--
c100599_g1	SC	3.00	2.54	305	--	--	--	--	--	--	--	--	--	--	--	--	--	--	--	--	--	--	--	--	--	--	--	--	--	--	--	--
c10059_g1	SC	7.00	1.03	702	--	--	--	--	--	--	--	--	--	--	--	--	--	--	--	--	--	--	--	--	--	--	--	--	--	--	--	--
c100600_g1	SC	1.00	7.48	206	--	--	--	--	--	--	--	--	--	--	--	--	--	--	--	--	--	--	--	--	--	--	--	--	--	--	--	--
c100601_g1	SC	5.00	5.46	285	--	--	--	--	--	--	--	--	--	--	--	--	--	--	--	--	--	--	--	--	--	--	--	--	--	--	--	--
c100603_g1	SC	1.00	8.82	202	--	--	--	--	--	--	--	--	--	--	--	--	--	--	--	--	--	--	--	--	--	--	--	--	--	--	--	--
c100604_g1	SC	1.00	7.19	207	--	--	--	--	--	--	--	--	--	--	--	--	--	--	--	--	--	--	--	--	--	--	--	--	--	--	--	--
c100606_g1	SC	2.00	3.50	257	--	--	--	--	--	--	--	--	--	--	--	--	--	--	--	--	--	--	--	--	--	--	--	--	--	--	--	--
c100607_g1	SC	9.00	2.07	529	--	--	--	--	--	--	--	--	--	--	--	--	--	--	--	--	--	--	--	--	--	--	--	--	--	--	--	--
c100608_g1	SC	2.00	3.57	256	--	--	--	--	--	--	--	--	--	--	--	--	--	--	--	--	--	--	--	--	--	--	--	--	--	--	--	--
c100609_g1	SC	7.00	4.71	327	--	--	--	--	--	--	--	--	--	--	--	--	--	--	--	--	--	--	--	--	--	--	--	--	--	--	--	--
c100610_g1	SC	3.00	7.47	241	--	--	--	--	--	--	--	--	--	--	--	--	--	--	--	--	--	--	--	--	--	--	--	--	--	--	--	--
c100611_g1	SC	1.00	6.17	211	--	--	--	--	--	--	--	--	--	--	--	--	--	--	--	--	--	--	--	--	--	--	--	--	--	--	--	--
c100612_g1	SC	1.00	2.55	240	--	--	--	--	--	--	--	--	--	--	--	--	--	--	--	--	--	--	--	--	--	--	--	--	--	--	--	--
c100613_g1	SC	1.00	3.15	232	--	--	--	--	--	--	--	--	--	--	--	--	--	--	--	--	--	--	--	--	--	--	--	--	--	--	--	--
c100614_g1	SC	2.00	5.80	235	--	--	--	--	--	--	--	--	--	--	--	--	--	--	--	--	--	--	--	--	--	--	--	--	--	--	--	--
c100615_g1	SC	1.00	1.79	256	--	--	--	--	--	--	--	--	--	--	--	--	--	--	--	--	--	--	--	--	--	--	--	--	--	--	--	--
c100616_g1	SC	3.00	2.86	295	--	--	--	--	--	--	--	--	--	--	--	--	--	--	--	--	--	--	--	--	--	--	--	--	--	--	--	--
c100617_g1	SC	1.00	6.17	211	--	--	--	--	--	--	--	--	--	--	--	--	--	--	--	--	--	--	--	--	--	--	--	--	--	--	--	--
c100619_g1	SC	2.00	2.04	290	--	--	--	--	--	--	--	--	--	--	--	--	--	--	--	--	--	--	--	--	--	--	--	--	--	--	--	--
c10061_g1	SC	10.00	2.61	492	171848939	2YQI	168	4.5839e-13	Chain A, Solution Structure Of The Second Hmg-Box Domain From High Mobility Group Protein B3	--	--	--	--	--	K11296	HMGB3	high mobility group protein B3	http://www.genome.jp/dbget-bin/www_bget?ko:K11296	O54879	169	7.84891e-14	High mobility group protein B3 OS=Mus musculus GN=Hmgb3 PE=2 SV=3	PF08073//PF04690	CHDNT (NUC034) domain//YABBY protein	GO:0007275//GO:0006355	multicellular organismal development//regulation of transcription, DNA-templated	GO:0003677//GO:0008270//GO:0005524//GO:0016818	DNA binding//zinc ion binding//ATP binding//hydrolase activity, acting on acid anhydrides, in phosphorus-containing anhydrides	GO:0005634	nucleus	KOG0381	HMG box-containing protein
c10061_g2	SC	4.00	4.63	281	260802712	XP_002596236.1	171	3.12682e-13	hypothetical protein BRAFLDRAFT_117987 [Branchiostoma floridae]>gi|229281490|gb|EEN52248.1| hypothetical protein BRAFLDRAFT_117987 [Branchiostoma floridae]	--	--	--	--	--	K11830	TFAM, MTTFA	transcription factor A, mitochondrial	http://www.genome.jp/dbget-bin/www_bget?ko:K11830	Q0II87	137	5.87561e-10	Transcription factor A, mitochondrial OS=Bos taurus GN=TFAM PE=2 SV=1	--	--	--	--	--	--	--	--	KOG0381	HMG box-containing protein
c100620_g1	SC	4.00	6.02	265	--	--	--	--	--	--	--	--	--	--	--	--	--	--	--	--	--	--	--	--	--	--	--	--	--	--	--	--
c100621_g1	SC	4.00	6.87	258	--	--	--	--	--	--	--	--	--	--	--	--	--	--	--	--	--	--	--	--	--	--	--	--	--	--	--	--
c100622_g1	SC	2.00	1.71	304	780075008	XP_011672054.1	312	7.58338e-31	PREDICTED: 1-phosphatidylinositol 3-phosphate 5-kinase [Strongylocentrotus purpuratus]	--	--	--	--	--	K00921	PIKFYVE, FAB1	1-phosphatidylinositol-3-phosphate 5-kinase	http://www.genome.jp/dbget-bin/www_bget?ko:K00921	Q9Y2I7	223	2.05434e-20	1-phosphatidylinositol 3-phosphate 5-kinase OS=Homo sapiens GN=PIKFYVE PE=1 SV=3	PF13912//PF01363//PF00096	C2H2-type zinc finger//FYVE zinc finger//Zinc finger, C2H2 type	--	--	GO:0046872	metal ion binding	--	--	KOG0230	Phosphatidylinositol-4-phosphate 5-kinase and related FYVE finger-containing proteins
c100623_g1	SC	1.00	6.17	211	--	--	--	--	--	--	--	--	--	--	--	--	--	--	--	--	--	--	--	--	--	--	--	--	--	--	--	--
c100624_g1	SC	2.00	7.71	225	--	--	--	--	--	--	--	--	--	--	--	--	--	--	--	--	--	--	--	--	--	--	--	--	--	--	--	--
c100625_g1	SC	1.00	2.98	234	--	--	--	--	--	--	--	--	--	--	--	--	--	--	--	--	--	--	--	--	--	--	--	--	--	--	--	--
c100627_g1	SC	2.00	1.05	357	828206915	XP_012557105.1	181	2.63057e-13	PREDICTED: uncharacterized protein C05D11.1-like [Hydra vulgaris]	--	--	--	--	--	--	--	--	--	--	--	--	--	--	--	--	--	--	--	--	--	--	--
c100628_g1	SC	1.00	4.10	223	--	--	--	--	--	--	--	--	--	--	--	--	--	--	--	--	--	--	--	--	--	--	--	--	--	--	--	--
c100629_g1	SC	2.00	1.63	308	--	--	--	--	--	--	--	--	--	--	--	--	--	--	--	--	--	--	--	--	--	--	--	--	--	--	--	--
c10062_g1	SC	29.00	2.84	940	780017792	XP_011664677.1	635	5.46488e-71	PREDICTED: transient receptor potential cation channel subfamily M member 2 isoform X6 [Strongylocentrotus purpuratus]	--	--	--	--	--	K04977	TRPM2	transient receptor potential cation channel subfamily M member 2	http://www.genome.jp/dbget-bin/www_bget?ko:K04977	Q9NZQ8	452	2.91816e-48	Transient receptor potential cation channel subfamily M member 5 OS=Homo sapiens GN=TRPM5 PE=2 SV=1	PF00520	Ion transport protein	GO:0055085//GO:0006811	transmembrane transport//ion transport	GO:0005216	ion channel activity	GO:0016020	membrane	KOG3614	Ca2+/Mg2+-permeable cation channels (LTRPC family)
c10062_g2	SC	16.00	4.17	493	--	--	--	--	--	--	--	--	--	--	--	--	--	--	--	--	--	--	PF00178	Ets-domain	GO:0006355	regulation of transcription, DNA-templated	GO:0043565//GO:0003700	sequence-specific DNA binding//transcription factor activity, sequence-specific DNA binding	GO:0005667	transcription factor complex	--	--
c100630_g1	SC	2.00	7.48	226	--	--	--	--	--	--	--	--	--	--	--	--	--	--	--	--	--	--	--	--	--	--	--	--	--	--	--	--
c100631_g1	SC	4.00	2.19	351	--	--	--	--	--	--	--	--	--	--	--	--	--	--	--	--	--	--	--	--	--	--	--	--	--	--	--	--
c100632_g1	SC	4.00	3.54	301	641764303	XP_008167284.1	270	1.45431e-26	PREDICTED: coiled-coil domain-containing protein 104 isoform X1 [Chrysemys picta bellii]	--	--	--	--	--	--	--	--	--	Q28IH8	258	2.55232e-26	Cilia- and flagella-associated protein 36 OS=Xenopus tropicalis GN=cfap36 PE=2 SV=2	--	--	--	--	--	--	--	--	--	--
c100633_g1	SC	3.00	5.94	251	--	--	--	--	--	--	--	--	--	--	--	--	--	--	--	--	--	--	--	--	--	--	--	--	--	--	--	--
c100635_g1	SC	2.00	3.18	262	--	--	--	--	--	--	--	--	--	--	--	--	--	--	--	--	--	--	--	--	--	--	--	--	--	--	--	--
c100637_g1	SC	18.00	15.22	305	147906855	NP_001084857.1	255	1.99222e-24	zinc transporter 7-B [Xenopus laevis]>gi|82185234|sp|Q6NRI1.1|ZNT7B_XENLA RecName: Full=Zinc transporter 7-B; Short=ZnT-7-B; AltName: Full=Solute carrier family 30 member 7-B [Xenopus laevis]>gi|47123970|gb|AAH70769.1| MGC83798 protein [Xenopus laevis]	--	--	--	--	--	K14692	SLC30A5_7, ZNT5_7, MTP, MSC2	solute carrier family 30 (zinc transporter), member 5/7	http://www.genome.jp/dbget-bin/www_bget?ko:K14692	Q6P3N9	255	8.19486e-26	Zinc transporter 7 OS=Xenopus tropicalis GN=slc30a7 PE=2 SV=1	PF01545	Cation efflux family	GO:0006812//GO:0055085//GO:0006829	cation transport//transmembrane transport//zinc II ion transport	GO:0008324	cation transmembrane transporter activity	GO:0005794//GO:0016021	Golgi apparatus//integral component of membrane	KOG1484	Putative Zn2+ transporter MSC2 (cation diffusion facilitator superfamily)
c100638_g1	SC	1.00	4.66	219	--	--	--	--	--	--	--	--	--	--	--	--	--	--	--	--	--	--	--	--	--	--	--	--	--	--	--	--
c100639_g1	SC	4.00	3.87	294	--	--	--	--	--	--	--	--	--	--	--	--	--	--	--	--	--	--	--	--	--	--	--	--	--	--	--	--
c10063_g1	SC	2.00	2.22	284	--	--	--	--	--	--	--	--	--	--	--	--	--	--	--	--	--	--	--	--	--	--	--	--	--	--	--	--
c100641_g1	SC	7.00	5.47	312	--	--	--	--	--	--	--	--	--	--	--	--	--	--	--	--	--	--	--	--	--	--	--	--	--	--	--	--
c100642_g1	SC	1.00	8.11	204	--	--	--	--	--	--	--	--	--	--	--	--	--	--	--	--	--	--	--	--	--	--	--	--	--	--	--	--
c100643_g1	SC	2.00	1.26	334	--	--	--	--	--	--	--	--	--	--	--	--	--	--	--	--	--	--	--	--	--	--	--	--	--	--	--	--
c100645_g1	SC	1.00	2.02	250	--	--	--	--	--	--	--	--	--	--	--	--	--	--	--	--	--	--	--	--	--	--	--	--	--	--	--	--
c100646_g1	SC	3.00	1.18	401	--	--	--	--	--	--	--	--	--	--	--	--	--	--	--	--	--	--	--	--	--	--	--	--	--	--	--	--
c100647_g1	SC	2.00	3.01	265	--	--	--	--	--	--	--	--	--	--	--	--	--	--	--	--	--	--	--	--	--	--	--	--	--	--	--	--
c100648_g1	SC	3.00	10.27	229	--	--	--	--	--	--	--	--	--	--	--	--	--	--	--	--	--	--	--	--	--	--	--	--	--	--	--	--
c100649_g1	SC	2.00	8.46	222	--	--	--	--	--	--	--	--	--	--	--	--	--	--	--	--	--	--	--	--	--	--	--	--	--	--	--	--
c10064_g1	SC	4.00	8.65	247	--	--	--	--	--	--	--	--	--	--	--	--	--	--	--	--	--	--	--	--	--	--	--	--	--	--	--	--
c100650_g1	SC	2.00	3.72	254	--	--	--	--	--	--	--	--	--	--	--	--	--	--	--	--	--	--	--	--	--	--	--	--	--	--	--	--
c100651_g1	SC	1.00	3.85	225	--	--	--	--	--	--	--	--	--	--	--	--	--	--	--	--	--	--	--	--	--	--	--	--	--	--	--	--
c100653_g1	SC	4.00	1.47	414	--	--	--	--	--	--	--	--	--	--	--	--	--	--	--	--	--	--	--	--	--	--	--	--	--	--	--	--
c100654_g1	SC	5.00	2.36	372	--	--	--	--	--	--	--	--	--	--	--	--	--	--	--	--	--	--	--	--	--	--	--	--	--	--	--	--
c100655_g1	SC	4.00	2.77	324	--	--	--	--	--	--	--	--	--	--	--	--	--	--	--	--	--	--	--	--	--	--	--	--	--	--	--	--
c100657_g1	SC	3.00	8.05	238	--	--	--	--	--	--	--	--	--	--	--	--	--	--	--	--	--	--	--	--	--	--	--	--	--	--	--	--
c100658_g1	SC	3.00	1.41	372	--	--	--	--	--	--	--	--	--	--	--	--	--	--	--	--	--	--	--	--	--	--	--	--	--	--	--	--
c10065_g1	SC	5.00	1.86	412	--	--	--	--	--	--	--	--	--	--	--	--	--	--	--	--	--	--	--	--	--	--	--	--	--	--	--	--
c100660_g1	SC	2.00	3.37	259	--	--	--	--	--	--	--	--	--	--	--	--	--	--	--	--	--	--	--	--	--	--	--	--	--	--	--	--
c100661_g1	SC	2.00	1.82	299	--	--	--	--	--	--	--	--	--	--	--	--	--	--	--	--	--	--	--	--	--	--	--	--	--	--	--	--
c100662_g1	SC	4.00	3.31	307	291222345	XP_002731178.1	137	1.08623e-07	PREDICTED: low-density lipoprotein receptor-related protein 5-like [Saccoglossus kowalevskii]	--	--	--	--	--	--	--	--	--	--	--	--	--	--	--	--	--	--	--	--	--	--	--
c100663_g1	SC	3.00	3.58	279	--	--	--	--	--	--	--	--	--	--	--	--	--	--	--	--	--	--	--	--	--	--	--	--	--	--	--	--
c100664_g1	SC	4.00	3.38	305	--	--	--	--	--	--	--	--	--	--	--	--	--	--	--	--	--	--	--	--	--	--	--	--	--	--	--	--
c100665_g1	SC	2.00	1.32	329	--	--	--	--	--	--	--	--	--	--	--	--	--	--	--	--	--	--	--	--	--	--	--	--	--	--	--	--
c100666_g1	SC	1.00	3.97	224	--	--	--	--	--	--	--	--	--	--	--	--	--	--	--	--	--	--	--	--	--	--	--	--	--	--	--	--
c100667_g1	SC	1.00	6.65	209	--	--	--	--	--	--	--	--	--	--	--	--	--	--	--	--	--	--	--	--	--	--	--	--	--	--	--	--
c100669_g1	SC	5.00	3.15	334	--	--	--	--	--	--	--	--	--	--	--	--	--	--	--	--	--	--	--	--	--	--	--	--	--	--	--	--
c10066_g1	SC	9.00	3.33	413	390343945	XP_003726002.1	283	1.04952e-27	PREDICTED: LOW QUALITY PROTEIN: testis-expressed sequence 9 protein [Strongylocentrotus purpuratus]	--	--	--	--	--	--	--	--	--	Q9D845	134	1.0682e-08	Testis-expressed sequence 9 protein OS=Mus musculus GN=Tex9 PE=2 SV=1	--	--	--	--	--	--	--	--	--	--
c100670_g1	SC	3.00	3.06	290	--	--	--	--	--	--	--	--	--	--	--	--	--	--	--	--	--	--	--	--	--	--	--	--	--	--	--	--
c100674_g1	SC	2.00	2.32	281	637357372	XP_008119506.1	209	3.12898e-17	PREDICTED: TBC1 domain family member 2A [Anolis carolinensis]	--	--	--	--	--	--	--	--	--	--	--	--	--	--	--	--	--	--	--	--	--	--	--
c100675_g1	SC	2.00	4.86	242	--	--	--	--	--	--	--	--	--	--	--	--	--	--	--	--	--	--	--	--	--	--	--	--	--	--	--	--
c100676_g1	SC	2.00	9.97	217	--	--	--	--	--	--	--	--	--	--	--	--	--	--	--	--	--	--	--	--	--	--	--	--	--	--	--	--
c100679_g1	SC	2.00	9.64	218	72044651	XP_788839.1	235	2.31122e-22	PREDICTED: pyrroline-5-carboxylate reductase 1, mitochondrial [Strongylocentrotus purpuratus]	--	--	--	--	--	K00286	proC	pyrroline-5-carboxylate reductase	http://www.genome.jp/dbget-bin/www_bget?ko:K00286	Q5R9X6	161	3.14505e-13	Pyrroline-5-carboxylate reductase 1, mitochondrial OS=Pongo abelii GN=PYCR1 PE=2 SV=1	--	--	--	--	--	--	--	--	KOG3124	Pyrroline-5-carboxylate reductase
c100682_g1	SC	1.00	9.20	201	--	--	--	--	--	--	--	--	--	--	--	--	--	--	--	--	--	--	--	--	--	--	--	--	--	--	--	--
c100684_g1	SC	5.00	3.00	340	--	--	--	--	--	--	--	--	--	--	--	--	--	--	--	--	--	--	--	--	--	--	--	--	--	--	--	--
c100685_g1	SC	5.00	1.43	469	--	--	--	--	--	--	--	--	--	--	--	--	--	--	--	--	--	--	--	--	--	--	--	--	--	--	--	--
c100686_g1	SC	1.00	4.37	221	--	--	--	--	--	--	--	--	--	--	--	--	--	--	--	--	--	--	--	--	--	--	--	--	--	--	--	--
c100687_g1	SC	2.00	4.98	241	--	--	--	--	--	--	--	--	--	--	--	--	--	--	--	--	--	--	--	--	--	--	--	--	--	--	--	--
c100688_g1	SC	1.00	3.53	228	--	--	--	--	--	--	--	--	--	--	--	--	--	--	--	--	--	--	--	--	--	--	--	--	--	--	--	--
c100689_g1	SC	1.00	2.21	246	--	--	--	--	--	--	--	--	--	--	--	--	--	--	--	--	--	--	--	--	--	--	--	--	--	--	--	--
c10068_g1	SC	10.00	8.97	300	--	--	--	--	--	--	--	--	--	--	--	--	--	--	--	--	--	--	--	--	--	--	--	--	--	--	--	--
c10068_g2	SC	59.00	5.77	942	--	--	--	--	--	--	--	--	--	--	--	--	--	--	--	--	--	--	--	--	--	--	--	--	--	--	--	--
c100690_g1	SC	3.00	3.42	282	--	--	--	--	--	--	--	--	--	--	--	--	--	--	--	--	--	--	--	--	--	--	--	--	--	--	--	--
c100691_g1	SC	6.00	15.32	240	--	--	--	--	--	--	--	--	--	--	--	--	--	--	--	--	--	--	--	--	--	--	--	--	--	--	--	--
c100693_g1	SC	5.00	2.66	355	--	--	--	--	--	--	--	--	--	--	--	--	--	--	--	--	--	--	--	--	--	--	--	--	--	--	--	--
c100694_g1	SC	1.00	4.23	222	--	--	--	--	--	--	--	--	--	--	--	--	--	--	--	--	--	--	--	--	--	--	--	--	--	--	--	--
c100695_g1	SC	3.00	3.69	277	--	--	--	--	--	--	--	--	--	--	--	--	--	--	--	--	--	--	--	--	--	--	--	--	--	--	--	--
c100696_g1	SC	11.00	8.25	316	--	--	--	--	--	--	--	--	--	--	--	--	--	--	--	--	--	--	--	--	--	--	--	--	--	--	--	--
c100697_g1	SC	4.00	3.38	305	--	--	--	--	--	--	--	--	--	--	--	--	--	--	--	--	--	--	--	--	--	--	--	--	--	--	--	--
c100698_g1	SC	3.00	3.87	274	780028555	XP_011666351.1	159	5.19331e-11	PREDICTED: beta-1,3-galactosyltransferase 1-like [Strongylocentrotus purpuratus]	--	--	--	--	--	--	--	--	--	Q5R5Y3	132	8.7679e-09	Beta-1,3-galactosyltransferase 2 OS=Pongo abelii GN=B3GALT2 PE=2 SV=1	PF01762	Galactosyltransferase	GO:0006486	protein glycosylation	GO:0008378	galactosyltransferase activity	GO:0016020	membrane	KOG2287	Galactosyltransferases
c100699_g1	SC	1.00	4.23	222	--	--	--	--	--	--	--	--	--	--	--	--	--	--	--	--	--	--	--	--	--	--	--	--	--	--	--	--
c10069_g1	SC	14.00	1.93	732	--	--	--	--	--	--	--	--	--	--	--	--	--	--	--	--	--	--	--	--	--	--	--	--	--	--	--	--
c1006_g1	SC	3.00	2.30	314	--	--	--	--	--	--	--	--	--	--	--	--	--	--	--	--	--	--	--	--	--	--	--	--	--	--	--	--
c100700_g1	SC	4.00	4.63	281	--	--	--	--	--	--	--	--	--	--	--	--	--	--	--	--	--	--	--	--	--	--	--	--	--	--	--	--
c100701_g1	SC	2.00	4.33	247	--	--	--	--	--	--	--	--	--	--	--	--	--	--	--	--	--	--	--	--	--	--	--	--	--	--	--	--
c100702_g1	SC	2.00	6.29	232	--	--	--	--	--	--	--	--	--	--	--	--	--	--	--	--	--	--	--	--	--	--	--	--	--	--	--	--
c100704_g1	SC	1.00	6.91	208	--	--	--	--	--	--	--	--	--	--	--	--	--	--	--	--	--	--	--	--	--	--	--	--	--	--	--	--
c100705_g1	SC	4.00	7.93	251	--	--	--	--	--	--	--	--	--	--	--	--	--	--	--	--	--	--	--	--	--	--	--	--	--	--	--	--
c100706_g1	SC	3.00	4.21	269	--	--	--	--	--	--	--	--	--	--	--	--	--	--	--	--	--	--	PF01844	HNH endonuclease	--	--	GO:0003676//GO:0004519	nucleic acid binding//endonuclease activity	--	--	--	--
c100707_g1	SC	3.00	10.89	227	--	--	--	--	--	--	--	--	--	--	--	--	--	--	--	--	--	--	PF09604	F subunit of K+-transporting ATPase (Potass_KdpF)	GO:0006813//GO:0043462	potassium ion transport//regulation of ATPase activity	GO:0008556	potassium-transporting ATPase activity	GO:0005886	plasma membrane	--	--
c100708_g1	SC	4.00	3.46	303	--	--	--	--	--	--	--	--	--	--	--	--	--	--	--	--	--	--	--	--	--	--	--	--	--	--	--	--
c100709_g1	SC	1.00	6.65	209	--	--	--	--	--	--	--	--	--	--	--	--	--	--	--	--	--	--	--	--	--	--	--	--	--	--	--	--
c10070_g1	SC	9.00	1.61	616	780185813	XP_011662665.1	158	1.10855e-09	PREDICTED: uncharacterized protein LOC100892660 [Strongylocentrotus purpuratus]	--	--	--	--	--	--	--	--	--	--	--	--	--	PF06121//PF15800	Domain of Unknown Function (DUF959)//Clock interacting protein circadian	GO:0045892//GO:0042754	negative regulation of transcription, DNA-templated//negative regulation of circadian rhythm	--	--	GO:0031012	extracellular matrix	--	--
c100710_g1	SC	1.00	0.63	334	--	--	--	--	--	--	--	--	--	--	--	--	--	--	--	--	--	--	--	--	--	--	--	--	--	--	--	--
c100711_g1	SC	3.00	6.49	247	--	--	--	--	--	--	--	--	--	--	--	--	--	--	--	--	--	--	--	--	--	--	--	--	--	--	--	--
c100712_g1	SC	2.00	4.86	242	390362523	XP_787531.2	166	8.35611e-12	PREDICTED: SCL-interrupting locus protein homolog [Strongylocentrotus purpuratus]	--	--	--	--	--	K16724	STIL	SCL-interrupting locus protein	http://www.genome.jp/dbget-bin/www_bget?ko:K16724	--	--	--	--	--	--	--	--	--	--	--	--	--	--
c100713_g1	SC	2.00	3.72	254	--	--	--	--	--	--	--	--	--	--	--	--	--	--	--	--	--	--	--	--	--	--	--	--	--	--	--	--
c100714_g1	SC	1.00	2.68	238	--	--	--	--	--	--	--	--	--	--	--	--	--	--	--	--	--	--	--	--	--	--	--	--	--	--	--	--
c100716_g1	SC	3.00	3.94	273	--	--	--	--	--	--	--	--	--	--	--	--	--	--	--	--	--	--	--	--	--	--	--	--	--	--	--	--
c100717_g1	SC	2.00	9.32	219	--	--	--	--	--	--	--	--	--	--	--	--	--	--	--	--	--	--	--	--	--	--	--	--	--	--	--	--
c100718_g1	SC	2.00	7.95	224	--	--	--	--	--	--	--	--	--	--	--	--	--	--	--	--	--	--	--	--	--	--	--	--	--	--	--	--
c100719_g1	SC	2.00	8.20	223	--	--	--	--	--	--	--	--	--	--	--	--	--	--	--	--	--	--	--	--	--	--	--	--	--	--	--	--
c100720_g1	SC	2.00	9.64	218	--	--	--	--	--	--	--	--	--	--	--	--	--	--	--	--	--	--	--	--	--	--	--	--	--	--	--	--
c100721_g1	SC	1.00	2.90	235	--	--	--	--	--	--	--	--	--	--	--	--	--	--	--	--	--	--	PF03213	Poxvirus P35 protein	--	--	--	--	GO:0019031	viral envelope	--	--
c100723_g1	SC	1.00	5.53	214	--	--	--	--	--	--	--	--	--	--	--	--	--	--	--	--	--	--	--	--	--	--	--	--	--	--	--	--
c100724_g1	SC	1.00	2.07	249	--	--	--	--	--	--	--	--	--	--	--	--	--	--	--	--	--	--	--	--	--	--	--	--	--	--	--	--
c100725_g1	SC	2.00	5.96	234	--	--	--	--	--	--	--	--	--	--	--	--	--	--	--	--	--	--	--	--	--	--	--	--	--	--	--	--
c100726_g1	SC	1.00	2.26	245	390335143	XP_001197720.2	167	7.82965e-12	PREDICTED: macrophage mannose receptor 1 [Strongylocentrotus purpuratus]	--	--	--	--	--	K06560	MRC	mannose receptor, C type	http://www.genome.jp/dbget-bin/www_bget?ko:K06560	Q90WJ8	117	9.84222e-08	Lactose-binding lectin l-2 OS=Anguilla japonica GN=l-2 PE=1 SV=2	--	--	--	--	--	--	--	--	--	--
c100727_g1	SC	2.00	7.48	226	--	--	--	--	--	--	--	--	--	--	--	--	--	--	--	--	--	--	PF06049	Coagulation Factor V LSPD Repeat	GO:0007596	blood coagulation	--	--	--	--	--	--
c100728_g1	SC	2.00	11.07	214	--	--	--	--	--	--	--	--	--	--	--	--	--	--	--	--	--	--	--	--	--	--	--	--	--	--	--	--
c100729_g1	SC	5.00	1.85	413	402585412	EJW79352.1	131	2.85107e-07	hypothetical protein WUBG_09738 [Wuchereria bancrofti]	--	--	--	--	--	--	--	--	--	--	--	--	--	PF13895	Immunoglobulin domain	--	--	GO:0005515	protein binding	--	--	--	--
c10072_g1	SC	13.00	1.84	720	291244792	XP_002742278.1	952	9.41795e-121	PREDICTED: elongation factor G, mitochondrial-like [Saccoglossus kowalevskii]	--	--	--	--	--	K02355	fusA, GFM, EFG	elongation factor G	http://www.genome.jp/dbget-bin/www_bget?ko:K02355	B0WGM1	930	5.65728e-119	Elongation factor G, mitochondrial OS=Culex quinquefasciatus GN=CPIJ005834 PE=3 SV=1	PF08138//PF04548//PF01926//PF02421	Sex peptide (SP) family//AIG1 family//50S ribosome-binding GTPase//Ferrous iron transport protein B	GO:0015684//GO:0007165//GO:0046008	ferrous iron transport//signal transduction//regulation of female receptivity, post-mating	GO:0015093//GO:0005525//GO:0005179	ferrous iron transmembrane transporter activity//GTP binding//hormone activity	GO:0005576//GO:0016021	extracellular region//integral component of membrane	KOG0465	Mitochondrial elongation factor
c100731_g1	SC	2.00	4.86	242	--	--	--	--	--	--	--	--	--	--	--	--	--	--	--	--	--	--	--	--	--	--	--	--	--	--	--	--
c100732_g1	SC	1.00	9.20	201	--	--	--	--	--	--	--	--	--	--	--	--	--	--	--	--	--	--	--	--	--	--	--	--	--	--	--	--
c100733_g1	SC	3.00	3.75	276	780057987	XP_011670024.1	203	1.79821e-16	PREDICTED: LOW QUALITY PROTEIN: RNA polymerase II-associated protein 1 [Strongylocentrotus purpuratus]	--	--	--	--	--	--	--	--	--	--	--	--	--	--	--	--	--	--	--	--	--	--	--
c100735_g1	SC	1.00	5.73	213	780007988	XP_011663381.1	269	8.67025e-26	PREDICTED: LOW QUALITY PROTEIN: SCY1-like protein 2 [Strongylocentrotus purpuratus]	--	--	--	--	--	K17541	SCYL2	SCY1-like protein 2	http://www.genome.jp/dbget-bin/www_bget?ko:K17541	Q8CFE4	215	6.22269e-20	SCY1-like protein 2 OS=Mus musculus GN=Scyl2 PE=1 SV=1	PF00069//PF07714	Protein kinase domain//Protein tyrosine kinase	GO:0006468	protein phosphorylation	GO:0005524//GO:0004672	ATP binding//protein kinase activity	--	--	KOG2137	Protein kinase
c100736_g1	SC	3.00	1.64	351	--	--	--	--	--	--	--	--	--	--	--	--	--	--	--	--	--	--	--	--	--	--	--	--	--	--	--	--
c100737_g1	SC	1.00	1.72	258	--	--	--	--	--	--	--	--	--	--	--	--	--	--	--	--	--	--	--	--	--	--	--	--	--	--	--	--
c100738_g1	SC	3.00	4.07	271	--	--	--	--	--	--	--	--	--	--	--	--	--	--	--	--	--	--	--	--	--	--	--	--	--	--	--	--
c100739_g1	SC	2.00	2.35	280	--	--	--	--	--	--	--	--	--	--	--	--	--	--	--	--	--	--	PF03286//PF06638//PF11705//PF01080//PF10152	Pox virus Ag35 surface protein//Strabismus protein//DNA-directed RNA polymerase III subunit Rpc31//Presenilin//Predicted coiled-coil domain-containing protein (DUF2360)	GO:0006359//GO:0007275	regulation of transcription from RNA polymerase III promoter//multicellular organismal development	GO:0004190	aspartic-type endopeptidase activity	GO:0016021//GO:0019031//GO:0071203	integral component of membrane//viral envelope//WASH complex	--	--
c10073_g1	SC	3.00	1.48	365	--	--	--	--	--	--	--	--	--	--	--	--	--	--	--	--	--	--	--	--	--	--	--	--	--	--	--	--
c100740_g1	SC	5.00	5.54	284	--	--	--	--	--	--	--	--	--	--	--	--	--	--	--	--	--	--	--	--	--	--	--	--	--	--	--	--
c100741_g1	SC	6.00	4.45	317	--	--	--	--	--	--	--	--	--	--	--	--	--	--	--	--	--	--	--	--	--	--	--	--	--	--	--	--
c100742_g1	SC	2.00	5.96	234	--	--	--	--	--	--	--	--	--	--	--	--	--	--	--	--	--	--	--	--	--	--	--	--	--	--	--	--
c100743_g1	SC	3.00	3.19	287	780025434	XP_011665905.1	159	9.75971e-11	PREDICTED: major facilitator superfamily domain-containing protein 6-like [Strongylocentrotus purpuratus]	--	--	--	--	--	--	--	--	--	--	--	--	--	--	--	--	--	--	--	--	--	--	--
c100744_g1	SC	6.00	2.14	420	--	--	--	--	--	--	--	--	--	--	--	--	--	--	--	--	--	--	--	--	--	--	--	--	--	--	--	--
c100746_g1	SC	2.00	5.37	238	--	--	--	--	--	--	--	--	--	--	--	--	--	--	--	--	--	--	PF00751	DM DNA binding domain	GO:0006355	regulation of transcription, DNA-templated	GO:0043565	sequence-specific DNA binding	--	--	--	--
c100747_g1	SC	2.00	2.67	272	--	--	--	--	--	--	--	--	--	--	--	--	--	--	--	--	--	--	--	--	--	--	--	--	--	--	--	--
c100748_g1	SC	2.00	1.26	334	--	--	--	--	--	--	--	--	--	--	--	--	--	--	--	--	--	--	--	--	--	--	--	--	--	--	--	--
c100749_g1	SC	3.00	2.86	295	--	--	--	--	--	--	--	--	--	--	--	--	--	--	--	--	--	--	--	--	--	--	--	--	--	--	--	--
c10074_g1	SC	14.00	5.26	410	--	--	--	--	--	--	--	--	--	--	--	--	--	--	--	--	--	--	--	--	--	--	--	--	--	--	--	--
c100752_g1	SC	4.00	4.37	285	--	--	--	--	--	--	--	--	--	--	--	--	--	--	--	--	--	--	--	--	--	--	--	--	--	--	--	--
c100753_g1	SC	1.00	8.45	203	--	--	--	--	--	--	--	--	--	--	--	--	--	--	--	--	--	--	--	--	--	--	--	--	--	--	--	--
c100754_g1	SC	3.00	5.05	259	--	--	--	--	--	--	--	--	--	--	--	--	--	--	--	--	--	--	--	--	--	--	--	--	--	--	--	--
c100756_g1	SC	3.00	3.23	286	--	--	--	--	--	--	--	--	--	--	--	--	--	--	--	--	--	--	--	--	--	--	--	--	--	--	--	--
c100757_g1	SC	1.00	6.40	210	--	--	--	--	--	--	--	--	--	--	--	--	--	--	--	--	--	--	--	--	--	--	--	--	--	--	--	--
c100758_g1	SC	2.00	12.81	210	--	--	--	--	--	--	--	--	--	--	--	--	--	--	--	--	--	--	--	--	--	--	--	--	--	--	--	--
c10075_g1	SC	30.00	3.60	809	--	--	--	--	--	--	--	--	--	--	--	--	--	--	--	--	--	--	--	--	--	--	--	--	--	--	--	--
c100760_g1	SC	5.00	7.80	263	--	--	--	--	--	--	--	--	--	--	--	--	--	--	--	--	--	--	--	--	--	--	--	--	--	--	--	--
c100761_g1	SC	5.00	6.45	274	--	--	--	--	--	--	--	--	--	--	--	--	--	--	--	--	--	--	--	--	--	--	--	--	--	--	--	--
c100762_g1	SC	1.00	1.40	269	--	--	--	--	--	--	--	--	--	--	--	--	--	--	--	--	--	--	--	--	--	--	--	--	--	--	--	--
c100765_g1	SC	5.00	6.15	277	--	--	--	--	--	--	--	--	--	--	--	--	--	--	--	--	--	--	--	--	--	--	--	--	--	--	--	--
c100766_g1	SC	15.00	9.81	330	--	--	--	--	--	--	--	--	--	--	--	--	--	--	--	--	--	--	--	--	--	--	--	--	--	--	--	--
c100767_g1	SC	3.00	2.20	318	--	--	--	--	--	--	--	--	--	--	--	--	--	--	--	--	--	--	--	--	--	--	--	--	--	--	--	--
c100768_g1	SC	2.00	13.83	208	--	--	--	--	--	--	--	--	--	--	--	--	--	--	--	--	--	--	--	--	--	--	--	--	--	--	--	--
c100769_g1	SC	1.00	1.19	279	--	--	--	--	--	--	--	--	--	--	--	--	--	--	--	--	--	--	--	--	--	--	--	--	--	--	--	--
c10076_g1	SC	19.00	9.27	367	--	--	--	--	--	--	--	--	--	--	--	--	--	--	--	--	--	--	--	--	--	--	--	--	--	--	--	--
c100770_g1	SC	4.00	2.14	354	780056327	XP_011669808.1	129	1.4725e-06	PREDICTED: sacsin [Strongylocentrotus purpuratus]	--	--	--	--	--	--	--	--	--	--	--	--	--	--	--	--	--	--	--	--	--	--	--
c100771_g1	SC	2.00	1.51	315	--	--	--	--	--	--	--	--	--	--	--	--	--	--	--	--	--	--	--	--	--	--	--	--	--	--	--	--
c100772_g1	SC	6.00	2.21	414	260831591	XP_002610742.1	335	2.53165e-33	hypothetical protein BRAFLDRAFT_90929 [Branchiostoma floridae]>gi|229296110|gb|EEN66752.1| hypothetical protein BRAFLDRAFT_90929 [Branchiostoma floridae]	--	--	--	--	--	--	--	--	--	E9QAM5	250	2.45397e-23	Helicase with zinc finger domain 2 OS=Mus musculus GN=Helz2 PE=1 SV=1	--	--	--	--	GO:0097159//GO:1901363	organic cyclic compound binding//heterocyclic compound binding	--	--	KOG1803	DNA helicase
c100773_g1	SC	1.00	6.65	209	--	--	--	--	--	--	--	--	--	--	--	--	--	--	--	--	--	--	--	--	--	--	--	--	--	--	--	--
c100774_g1	SC	6.00	2.97	365	--	--	--	--	--	--	--	--	--	--	--	--	--	--	--	--	--	--	--	--	--	--	--	--	--	--	--	--
c100775_g1	SC	1.00	7.79	205	--	--	--	--	--	--	--	--	--	--	--	--	--	--	--	--	--	--	--	--	--	--	--	--	--	--	--	--
c100776_g1	SC	2.00	8.46	222	--	--	--	--	--	--	--	--	--	--	--	--	--	--	--	--	--	--	--	--	--	--	--	--	--	--	--	--
c100777_g1	SC	2.00	3.88	252	--	--	--	--	--	--	--	--	--	--	--	--	--	--	--	--	--	--	--	--	--	--	--	--	--	--	--	--
c100778_g1	SC	1.00	6.65	209	--	--	--	--	--	--	--	--	--	--	--	--	--	--	--	--	--	--	--	--	--	--	--	--	--	--	--	--
c100779_g1	SC	1.00	3.85	225	--	--	--	--	--	--	--	--	--	--	--	--	--	--	--	--	--	--	--	--	--	--	--	--	--	--	--	--
c10077_g1	SC	2.00	3.57	256	--	--	--	--	--	--	--	--	--	--	--	--	--	--	--	--	--	--	PF10541	Nuclear envelope localisation domain	--	--	--	--	GO:0016021	integral component of membrane	--	--
c100780_g1	SC	1.00	7.79	205	--	--	--	--	--	--	--	--	--	--	--	--	--	--	--	--	--	--	--	--	--	--	--	--	--	--	--	--
c100782_g1	SC	3.00	3.47	281	--	--	--	--	--	--	--	--	--	--	--	--	--	--	--	--	--	--	--	--	--	--	--	--	--	--	--	--
c100784_g1	SC	2.00	1.32	329	--	--	--	--	--	--	--	--	--	--	--	--	--	--	--	--	--	--	PF04977//PF06160//PF13851//PF01025//PF10473//PF07926	Septum formation initiator//Septation ring formation regulator, EzrA//Growth-arrest specific micro-tubule binding//GrpE//Leucine-rich repeats of kinetochore protein Cenp-F/LEK1//TPR/MLP1/MLP2-like protein	GO:0006606//GO:0006457//GO:0048870//GO:0000921//GO:0007049	protein import into nucleus//protein folding//cell motility//septin ring assembly//cell cycle	GO:0000774//GO:0045502//GO:0051087//GO:0042803//GO:0008134	adenyl-nucleotide exchange factor activity//dynein binding//chaperone binding//protein homodimerization activity//transcription factor binding	GO:0016021//GO:0031514//GO:0030286//GO:0005940//GO:0005667	integral component of membrane//motile cilium//dynein complex//septin ring//transcription factor complex	--	--
c100785_g1	SC	4.00	26.61	209	--	--	--	--	--	--	--	--	--	--	--	--	--	--	--	--	--	--	--	--	--	--	--	--	--	--	--	--
c100786_g1	SC	2.00	9.32	219	--	--	--	--	--	--	--	--	--	--	--	--	--	--	--	--	--	--	--	--	--	--	--	--	--	--	--	--
c100787_g1	SC	4.00	3.03	315	--	--	--	--	--	--	--	--	--	--	--	--	--	--	--	--	--	--	--	--	--	--	--	--	--	--	--	--
c100788_g1	SC	1.00	6.17	211	--	--	--	--	--	--	--	--	--	--	--	--	--	--	--	--	--	--	--	--	--	--	--	--	--	--	--	--
c100789_g1	SC	1.00	4.99	217	--	--	--	--	--	--	--	--	--	--	--	--	--	--	--	--	--	--	--	--	--	--	--	--	--	--	--	--
c100790_g1	SC	3.00	4.51	265	--	--	--	--	--	--	--	--	--	--	--	--	--	--	--	--	--	--	--	--	--	--	--	--	--	--	--	--
c100791_g1	SC	1.00	5.95	212	--	--	--	--	--	--	--	--	--	--	--	--	--	--	--	--	--	--	--	--	--	--	--	--	--	--	--	--
c100792_g1	SC	1.00	1.68	259	260803116	XP_002596437.1	137	1.47757e-08	hypothetical protein BRAFLDRAFT_77148 [Branchiostoma floridae]>gi|229281693|gb|EEN52449.1| hypothetical protein BRAFLDRAFT_77148 [Branchiostoma floridae]	--	--	--	--	--	--	--	--	--	A1A4M4	118	3.13795e-07	Putative deoxyribonuclease TATDN3 OS=Bos taurus GN=TATDN3 PE=2 SV=1	PF01026	TatD related DNase	GO:0006308	DNA catabolic process	GO:0016888	endodeoxyribonuclease activity, producing 5'-phosphomonoesters	--	--	--	--
c100793_g1	SC	3.00	2.37	311	115623556	XP_799928.2	350	1.79667e-36	PREDICTED: uncharacterized protein LOC576785 isoform X1 [Strongylocentrotus purpuratus]	--	--	--	--	--	--	--	--	--	--	--	--	--	PF01146//PF06305//PF00832//PF00902	Caveolin//Protein of unknown function (DUF1049)//Ribosomal L39 protein//Sec-independent protein translocase protein (TatC)	GO:0070836//GO:0042254//GO:0006412	caveola assembly//ribosome biogenesis//translation	GO:0003735	structural constituent of ribosome	GO:0005840//GO:0005887//GO:0016021//GO:0005622	ribosome//integral component of plasma membrane//integral component of membrane//intracellular	--	--
c100794_g1	SC	2.00	14.96	206	390351514	XP_796839.3	187	1.04976e-15	PREDICTED: uncharacterized protein C10orf107 homolog [Strongylocentrotus purpuratus]	--	--	--	--	--	--	--	--	--	--	--	--	--	--	--	--	--	--	--	--	--	--	--
c100795_g1	SC	5.00	2.83	347	--	--	--	--	--	--	--	--	--	--	--	--	--	--	--	--	--	--	--	--	--	--	--	--	--	--	--	--
c100797_g1	SC	2.00	0.95	371	--	--	--	--	--	--	--	--	--	--	--	--	--	--	--	--	--	--	--	--	--	--	--	--	--	--	--	--
c100799_g1	SC	4.00	1.85	375	--	--	--	--	--	--	--	--	--	--	--	--	--	--	--	--	--	--	--	--	--	--	--	--	--	--	--	--
c10079_g1	SC	15.00	4.38	464	--	--	--	--	--	--	--	--	--	--	--	--	--	--	--	--	--	--	--	--	--	--	--	--	--	--	--	--
c100800_g1	SC	2.00	4.86	242	--	--	--	--	--	--	--	--	--	--	--	--	--	--	--	--	--	--	--	--	--	--	--	--	--	--	--	--
c100801_g1	SC	1.00	1.29	274	196008951	XP_002114341.1	236	4.36358e-21	hypothetical protein TRIADDRAFT_58047 [Trichoplax adhaerens]>gi|190583360|gb|EDV23431.1| hypothetical protein TRIADDRAFT_58047 [Trichoplax adhaerens]	--	--	--	--	--	--	--	--	--	--	--	--	--	--	--	--	--	--	--	--	--	--	--
c100802_g1	SC	1.00	7.48	206	--	--	--	--	--	--	--	--	--	--	--	--	--	--	--	--	--	--	--	--	--	--	--	--	--	--	--	--
c100803_g1	SC	1.00	1.50	265	--	--	--	--	--	--	--	--	--	--	--	--	--	--	--	--	--	--	--	--	--	--	--	--	--	--	--	--
c100804_g1	SC	2.00	2.28	282	528524626	NP_001268680.1	365	3.44689e-38	ATP-binding cassette, sub-family B (MDR/TAP), member 4 [Strongylocentrotus purpuratus]>gi|384407040|gb|AFH89631.1| ATP-binding cassette transporter subfamily B member 4a [Strongylocentrotus purpuratus]	--	--	--	--	--	K05658	ABCB1	ATP-binding cassette, subfamily B (MDR/TAP), member 1	http://www.genome.jp/dbget-bin/www_bget?ko:K05658	P21449	293	5.94681e-30	Multidrug resistance protein 2 OS=Cricetulus griseus GN=PGY2 PE=2 SV=2	PF01926//PF02367//PF13304//PF00005//PF00910//PF07728//PF00931//PF00503//PF03193	50S ribosome-binding GTPase//Threonylcarbamoyl adenosine biosynthesis protein TsaE//AAA domain, putative AbiEii toxin, Type IV TA system//ABC transporter//RNA helicase//AAA domain (dynein-related subfamily)//NB-ARC domain//G-protein alpha subunit//Protein of unknown function, DUF258	GO:0007186//GO:0055085//GO:0006200//GO:0006810//GO:0007165//GO:0002949	G-protein coupled receptor signaling pathway//transmembrane transport//obsolete ATP catabolic process//transport//signal transduction//tRNA threonylcarbamoyladenosine modification	GO:0005525//GO:0019001//GO:0003724//GO:0005524//GO:0042626//GO:0003924//GO:0016887//GO:0003723//GO:0043531//GO:0031683//GO:0004871	GTP binding//guanyl nucleotide binding//RNA helicase activity//ATP binding//ATPase activity, coupled to transmembrane movement of substances//GTPase activity//ATPase activity//RNA binding//ADP binding//G-protein beta/gamma-subunit complex binding//signal transducer activity	GO:0016021	integral component of membrane	KOG0055	Multidrug/pheromone exporter, ABC superfamily
c100805_g1	SC	1.00	3.33	230	--	--	--	--	--	--	--	--	--	--	--	--	--	--	--	--	--	--	--	--	--	--	--	--	--	--	--	--
c100806_g1	SC	2.00	6.12	233	--	--	--	--	--	--	--	--	--	--	--	--	--	--	--	--	--	--	--	--	--	--	--	--	--	--	--	--
c100807_g1	SC	3.00	2.76	298	--	--	--	--	--	--	--	--	--	--	--	--	--	--	--	--	--	--	PF02892	BED zinc finger	--	--	GO:0003677	DNA binding	--	--	--	--
c100808_g1	SC	9.00	2.46	480	--	--	--	--	--	--	--	--	--	--	--	--	--	--	--	--	--	--	--	--	--	--	--	--	--	--	--	--
c100810_g1	SC	2.00	3.50	257	--	--	--	--	--	--	--	--	--	--	--	--	--	--	--	--	--	--	--	--	--	--	--	--	--	--	--	--
c100811_g1	SC	8.00	4.32	353	--	--	--	--	--	--	--	--	--	--	--	--	--	--	--	--	--	--	--	--	--	--	--	--	--	--	--	--
c100812_g1	SC	1.00	9.20	201	--	--	--	--	--	--	--	--	--	--	--	--	--	--	--	--	--	--	--	--	--	--	--	--	--	--	--	--
c100813_g1	SC	4.00	2.64	329	--	--	--	--	--	--	--	--	--	--	--	--	--	--	--	--	--	--	--	--	--	--	--	--	--	--	--	--
c100815_g1	SC	2.00	3.01	265	--	--	--	--	--	--	--	--	--	--	--	--	--	--	--	--	--	--	--	--	--	--	--	--	--	--	--	--
c100816_g1	SC	2.00	9.32	219	--	--	--	--	--	--	--	--	--	--	--	--	--	--	--	--	--	--	--	--	--	--	--	--	--	--	--	--
c100817_g1	SC	2.00	2.67	272	--	--	--	--	--	--	--	--	--	--	--	--	--	--	--	--	--	--	--	--	--	--	--	--	--	--	--	--
c100819_g1	SC	2.00	6.12	233	--	--	--	--	--	--	--	--	--	--	--	--	--	--	--	--	--	--	--	--	--	--	--	--	--	--	--	--
c10081_g1	SC	17.00	2.39	724	--	--	--	--	--	--	--	--	--	--	--	--	--	--	--	--	--	--	--	--	--	--	--	--	--	--	--	--
c100820_g1	SC	6.00	2.10	424	--	--	--	--	--	--	--	--	--	--	--	--	--	--	--	--	--	--	--	--	--	--	--	--	--	--	--	--
c100821_g1	SC	4.00	9.06	245	--	--	--	--	--	--	--	--	--	--	--	--	--	--	--	--	--	--	--	--	--	--	--	--	--	--	--	--
c100824_g1	SC	1.00	6.40	210	780037757	XP_011667639.1	136	4.79309e-08	PREDICTED: probable indole-3-acetic acid-amido synthetase GH3.5 [Strongylocentrotus purpuratus]	--	--	--	--	--	--	--	--	--	--	--	--	--	--	--	--	--	--	--	--	--	--	--
c100826_g1	SC	5.00	14.51	235	--	--	--	--	--	--	--	--	--	--	--	--	--	--	--	--	--	--	--	--	--	--	--	--	--	--	--	--
c100827_g1	SC	1.00	8.45	203	--	--	--	--	--	--	--	--	--	--	--	--	--	--	--	--	--	--	--	--	--	--	--	--	--	--	--	--
c100828_g1	SC	3.00	1.37	377	--	--	--	--	--	--	--	--	--	--	--	--	--	--	--	--	--	--	--	--	--	--	--	--	--	--	--	--
c100829_g1	SC	1.00	6.17	211	--	--	--	--	--	--	--	--	--	--	--	--	--	--	--	--	--	--	--	--	--	--	--	--	--	--	--	--
c10082_g1	SC	282.00	5.47	3846	390361755	XP_003729992.1	367	1.73796e-32	PREDICTED: homeodomain-interacting protein kinase 3 [Strongylocentrotus purpuratus]	--	--	--	--	--	--	--	--	--	Q09815	170	1.02078e-10	Serine/threonine-protein kinase ppk5 OS=Schizosaccharomyces pombe (strain 972 / ATCC 24843) GN=ppk5 PE=1 SV=1	PF00069	Protein kinase domain	GO:0006468	protein phosphorylation	GO:0004672//GO:0005524	protein kinase activity//ATP binding	--	--	KOG0667	Dual-specificity tyrosine-phosphorylation regulated kinase
c100830_g1	SC	1.00	4.51	220	--	--	--	--	--	--	--	--	--	--	--	--	--	--	--	--	--	--	--	--	--	--	--	--	--	--	--	--
c100831_g1	SC	1.00	2.07	249	--	--	--	--	--	--	--	--	--	--	--	--	--	--	--	--	--	--	--	--	--	--	--	--	--	--	--	--
c100832_g1	SC	12.00	3.65	454	780097541	XP_011674828.1	355	3.09075e-37	PREDICTED: lysophospholipid acyltransferase 7 [Strongylocentrotus purpuratus]>gi|780097546|ref|XP_011674829.1| PREDICTED: lysophospholipid acyltransferase 7 [Strongylocentrotus purpuratus]	--	--	--	--	--	K13516	MBOAT7	lysophospholipid acyltransferase 7	http://www.genome.jp/dbget-bin/www_bget?ko:K13516	Q7SZQ0	184	5.02126e-15	Lysophospholipid acyltransferase 7 OS=Danio rerio GN=mboat7 PE=2 SV=1	PF05208	ALG3 protein	--	--	GO:0016758	transferase activity, transferring hexosyl groups	GO:0016021//GO:0005783	integral component of membrane//endoplasmic reticulum	--	--
c100833_g1	SC	5.00	2.12	389	--	--	--	--	--	--	--	--	--	--	--	--	--	--	--	--	--	--	--	--	--	--	--	--	--	--	--	--
c100834_g1	SC	2.00	13.30	209	780166683	XP_011683867.1	148	1.29802e-09	PREDICTED: MYCBP-associated protein isoform X1 [Strongylocentrotus purpuratus]	--	--	--	--	--	--	--	--	--	--	--	--	--	--	--	--	--	--	--	--	--	--	--
c100835_g1	SC	1.00	3.53	228	--	--	--	--	--	--	--	--	--	--	--	--	--	--	--	--	--	--	--	--	--	--	--	--	--	--	--	--
c100836_g1	SC	2.00	1.40	323	762169383	XP_011423095.1	359	2.90638e-38	PREDICTED: dimethylaniline monooxygenase [N-oxide-forming] 5-like [Crassostrea gigas]>gi|762169385|ref|XP_011423096.1| PREDICTED: dimethylaniline monooxygenase [N-oxide-forming] 5-like [Crassostrea gigas]>gi|762169387|ref|XP_011423097.1| PREDICTED: dimethylaniline monooxygenase [N-oxide-forming] 5-like [Crassostrea gigas]	--	--	--	--	--	K00485	FMO	dimethylaniline monooxygenase (N-oxide forming)	http://www.genome.jp/dbget-bin/www_bget?ko:K00485	P49109	280	9.87924e-29	Dimethylaniline monooxygenase [N-oxide-forming] 5 OS=Cavia porcellus GN=FMO5 PE=2 SV=2	PF02789//PF00070//PF07992//PF00743	Cytosol aminopeptidase family, N-terminal domain//Pyridine nucleotide-disulphide oxidoreductase//Pyridine nucleotide-disulphide oxidoreductase//Flavin-binding monooxygenase-like	GO:0006508//GO:0055114	proteolysis//oxidation-reduction process	GO:0050660//GO:0004177//GO:0050661//GO:0016491//GO:0004499	flavin adenine dinucleotide binding//aminopeptidase activity//NADP binding//oxidoreductase activity//N,N-dimethylaniline monooxygenase activity	GO:0005622	intracellular	KOG1399	Flavin-containing monooxygenase
c100837_g1	SC	1.00	1.50	265	--	--	--	--	--	--	--	--	--	--	--	--	--	--	--	--	--	--	--	--	--	--	--	--	--	--	--	--
c100838_g1	SC	2.00	3.37	259	--	--	--	--	--	--	--	--	--	--	--	--	--	--	--	--	--	--	--	--	--	--	--	--	--	--	--	--
c100839_g1	SC	1.00	4.66	219	--	--	--	--	--	--	--	--	--	--	--	--	--	--	--	--	--	--	--	--	--	--	--	--	--	--	--	--
c10083_g1	SC	59.00	13.65	527	--	--	--	--	--	--	--	--	--	--	--	--	--	--	--	--	--	--	--	--	--	--	--	--	--	--	--	--
c100840_g1	SC	1.00	8.45	203	--	--	--	--	--	--	--	--	--	--	--	--	--	--	--	--	--	--	--	--	--	--	--	--	--	--	--	--
c100842_g1	SC	27.00	9.35	426	--	--	--	--	--	--	--	--	--	--	--	--	--	--	--	--	--	--	--	--	--	--	--	--	--	--	--	--
c100843_g1	SC	2.00	3.80	253	--	--	--	--	--	--	--	--	--	--	--	--	--	--	--	--	--	--	--	--	--	--	--	--	--	--	--	--
c100845_g1	SC	1.00	3.63	227	--	--	--	--	--	--	--	--	--	--	--	--	--	--	--	--	--	--	--	--	--	--	--	--	--	--	--	--
c100846_g1	SC	5.00	37.40	206	--	--	--	--	--	--	--	--	--	--	--	--	--	--	--	--	--	--	--	--	--	--	--	--	--	--	--	--
c100848_g1	SC	3.00	3.28	285	--	--	--	--	--	--	--	--	--	--	--	--	--	--	--	--	--	--	--	--	--	--	--	--	--	--	--	--
c10084_g1	SC	633.00	30.68	1674	--	--	--	--	--	--	--	--	--	--	--	--	--	--	--	--	--	--	PF01914	MarC family integral membrane protein	--	--	--	--	GO:0016021	integral component of membrane	--	--
c100850_g1	SC	5.00	3.10	336	--	--	--	--	--	--	--	--	--	--	--	--	--	--	--	--	--	--	--	--	--	--	--	--	--	--	--	--
c100851_g1	SC	1.00	2.49	241	--	--	--	--	--	--	--	--	--	--	--	--	--	--	--	--	--	--	--	--	--	--	--	--	--	--	--	--
c100852_g1	SC	2.00	5.37	238	--	--	--	--	--	--	--	--	--	--	--	--	--	--	--	--	--	--	--	--	--	--	--	--	--	--	--	--
c100853_g1	SC	3.00	2.20	318	--	--	--	--	--	--	--	--	--	--	--	--	--	--	--	--	--	--	--	--	--	--	--	--	--	--	--	--
c100855_g1	SC	2.00	8.74	221	--	--	--	--	--	--	--	--	--	--	--	--	--	--	--	--	--	--	--	--	--	--	--	--	--	--	--	--
c100858_g1	SC	2.00	3.72	254	--	--	--	--	--	--	--	--	--	--	--	--	--	--	--	--	--	--	--	--	--	--	--	--	--	--	--	--
c100859_g1	SC	2.00	1.58	311	--	--	--	--	--	--	--	--	--	--	--	--	--	--	--	--	--	--	--	--	--	--	--	--	--	--	--	--
c100861_g1	SC	2.00	3.37	259	--	--	--	--	--	--	--	--	--	--	--	--	--	--	--	--	--	--	--	--	--	--	--	--	--	--	--	--
c100863_g1	SC	1.00	7.79	205	--	--	--	--	--	--	--	--	--	--	--	--	--	--	--	--	--	--	--	--	--	--	--	--	--	--	--	--
c100864_g1	SC	1.00	5.73	213	--	--	--	--	--	--	--	--	--	--	--	--	--	--	--	--	--	--	--	--	--	--	--	--	--	--	--	--
c100866_g1	SC	1.00	1.23	277	--	--	--	--	--	--	--	--	--	--	--	--	--	--	--	--	--	--	--	--	--	--	--	--	--	--	--	--
c100867_g1	SC	2.00	3.96	251	--	--	--	--	--	--	--	--	--	--	--	--	--	--	--	--	--	--	--	--	--	--	--	--	--	--	--	--
c100868_g1	SC	1.00	3.97	224	--	--	--	--	--	--	--	--	--	--	--	--	--	--	--	--	--	--	--	--	--	--	--	--	--	--	--	--
c100869_g1	SC	1.00	2.16	247	--	--	--	--	--	--	--	--	--	--	--	--	--	--	--	--	--	--	--	--	--	--	--	--	--	--	--	--
c10086_g1	SC	5.00	1.48	461	--	--	--	--	--	--	--	--	--	--	--	--	--	--	--	--	--	--	--	--	--	--	--	--	--	--	--	--
c100870_g1	SC	1.00	3.33	230	--	--	--	--	--	--	--	--	--	--	--	--	--	--	--	--	--	--	--	--	--	--	--	--	--	--	--	--
c100871_g1	SC	2.00	7.95	224	--	--	--	--	--	--	--	--	--	--	--	--	--	--	--	--	--	--	--	--	--	--	--	--	--	--	--	--
c100873_g1	SC	1.00	7.19	207	--	--	--	--	--	--	--	--	--	--	--	--	--	--	--	--	--	--	--	--	--	--	--	--	--	--	--	--
c100874_g1	SC	4.00	5.81	267	--	--	--	--	--	--	--	--	--	--	--	--	--	--	--	--	--	--	--	--	--	--	--	--	--	--	--	--
c100875_g1	SC	1.00	4.37	221	--	--	--	--	--	--	--	--	--	--	--	--	--	--	--	--	--	--	--	--	--	--	--	--	--	--	--	--
c100877_g1	SC	2.00	6.29	232	815813411	XP_012227690.1	197	5.40974e-16	PREDICTED: LOW QUALITY PROTEIN: ATP-citrate synthase [Linepithema humile]	--	--	--	--	--	K01648	ACLY	ATP citrate (pro-S)-lyase	http://www.genome.jp/dbget-bin/www_bget?ko:K01648	Q32PF2	137	1.85882e-09	ATP-citrate synthase OS=Bos taurus GN=ACLY PE=2 SV=1	--	--	--	--	--	--	--	--	KOG1254	ATP-citrate lyase
c100878_g1	SC	2.00	7.95	224	--	--	--	--	--	--	--	--	--	--	--	--	--	--	--	--	--	--	--	--	--	--	--	--	--	--	--	--
c100879_g1	SC	2.00	1.44	320	--	--	--	--	--	--	--	--	--	--	--	--	--	--	--	--	--	--	--	--	--	--	--	--	--	--	--	--
c10087_g1	SC	8.00	1.59	576	--	--	--	--	--	--	--	--	--	--	--	--	--	--	--	--	--	--	--	--	--	--	--	--	--	--	--	--
c10087_g2	SC	2.00	1.56	312	--	--	--	--	--	--	--	--	--	--	--	--	--	--	--	--	--	--	--	--	--	--	--	--	--	--	--	--
c100882_g1	SC	1.00	1.16	281	--	--	--	--	--	--	--	--	--	--	--	--	--	--	--	--	--	--	--	--	--	--	--	--	--	--	--	--
c100883_g1	SC	2.00	4.75	243	780001185	XP_011680701.1	128	4.6545e-07	PREDICTED: lysosomal acid phosphatase [Strongylocentrotus purpuratus]	--	--	--	--	--	--	--	--	--	--	--	--	--	PF00328	Histidine phosphatase superfamily (branch 2)	GO:0006771//GO:0019497	riboflavin metabolic process//hexachlorocyclohexane metabolic process	GO:0003993	acid phosphatase activity	--	--	--	--
c100884_g1	SC	3.00	12.30	223	--	--	--	--	--	--	--	--	--	--	--	--	--	--	--	--	--	--	--	--	--	--	--	--	--	--	--	--
c100885_g1	SC	2.00	9.97	217	--	--	--	--	--	--	--	--	--	--	--	--	--	--	--	--	--	--	--	--	--	--	--	--	--	--	--	--
c100886_g1	SC	1.00	2.43	242	--	--	--	--	--	--	--	--	--	--	--	--	--	--	--	--	--	--	--	--	--	--	--	--	--	--	--	--
c100888_g1	SC	2.00	2.32	281	--	--	--	--	--	--	--	--	--	--	--	--	--	--	--	--	--	--	--	--	--	--	--	--	--	--	--	--
c100889_g1	SC	6.00	3.07	360	--	--	--	--	--	--	--	--	--	--	--	--	--	--	--	--	--	--	--	--	--	--	--	--	--	--	--	--
c10088_g1	SC	4.00	7.93	251	780019194	XP_011664882.1	124	1.87351e-06	PREDICTED: beta-1,3-glucosyltransferase [Strongylocentrotus purpuratus]	--	--	--	--	--	--	--	--	--	--	--	--	--	PF02269//PF00437	Transcription initiation factor IID, 18kD subunit//Type II/IV secretion system protein	GO:0006366//GO:0006810	transcription from RNA polymerase II promoter//transport	GO:0005524	ATP binding	--	--	--	--
c100891_g1	SC	4.00	3.82	295	--	--	--	--	--	--	--	--	--	--	--	--	--	--	--	--	--	--	--	--	--	--	--	--	--	--	--	--
c100892_g1	SC	1.00	4.99	217	--	--	--	--	--	--	--	--	--	--	--	--	--	--	--	--	--	--	--	--	--	--	--	--	--	--	--	--
c100893_g1	SC	2.00	5.11	240	780025756	XP_011665955.1	184	1.46491e-14	PREDICTED: uncharacterized protein LOC105439087 [Strongylocentrotus purpuratus]	--	--	--	--	--	--	--	--	--	--	--	--	--	--	--	--	--	--	--	--	--	--	--
c100894_g1	SC	1.00	2.43	242	--	--	--	--	--	--	--	--	--	--	--	--	--	--	--	--	--	--	--	--	--	--	--	--	--	--	--	--
c100895_g1	SC	3.00	13.53	220	--	--	--	--	--	--	--	--	--	--	--	--	--	--	--	--	--	--	--	--	--	--	--	--	--	--	--	--
c100897_g1	SC	3.00	5.15	258	--	--	--	--	--	--	--	--	--	--	--	--	--	--	--	--	--	--	--	--	--	--	--	--	--	--	--	--
c10089_g1	SC	19.00	2.17	840	--	--	--	--	--	--	--	--	--	--	--	--	--	--	--	--	--	--	PF00196	Bacterial regulatory proteins, luxR family	GO:0006355	regulation of transcription, DNA-templated	--	--	--	--	--	--
c1008_g1	SC	4.00	3.27	308	--	--	--	--	--	--	--	--	--	--	--	--	--	--	--	--	--	--	--	--	--	--	--	--	--	--	--	--
c100900_g1	SC	2.00	3.43	258	--	--	--	--	--	--	--	--	--	--	--	--	--	--	--	--	--	--	--	--	--	--	--	--	--	--	--	--
c100901_g1	SC	1.00	4.23	222	--	--	--	--	--	--	--	--	--	--	--	--	--	--	--	--	--	--	--	--	--	--	--	--	--	--	--	--
c100902_g1	SC	4.00	1.77	382	--	--	--	--	--	--	--	--	--	--	--	--	--	--	--	--	--	--	--	--	--	--	--	--	--	--	--	--
c100904_g1	SC	1.00	2.07	249	--	--	--	--	--	--	--	--	--	--	--	--	--	--	--	--	--	--	--	--	--	--	--	--	--	--	--	--
c100905_g1	SC	2.00	4.64	244	765110979	XP_011484321.1	237	1.11778e-21	PREDICTED: multidrug and toxin extrusion protein 1-like isoform X1 [Oryzias latipes]	--	--	--	--	--	K03327	TC.MATE, SLC47A, norM, mdtK, dinF	multidrug resistance protein, MATE family	http://www.genome.jp/dbget-bin/www_bget?ko:K03327	A1L1P9	219	1.58838e-20	Multidrug and toxin extrusion protein 1 OS=Danio rerio GN=slc47a1 PE=2 SV=1	PF01554	MatE	GO:0055085//GO:0006855//GO:0015893//GO:0006810	transmembrane transport//drug transmembrane transport//drug transport//transport	GO:0015297//GO:0015238	antiporter activity//drug transmembrane transporter activity	GO:0016020	membrane	KOG1347	Uncharacterized membrane protein, predicted efflux pump
c100906_g1	SC	1.00	8.45	203	--	--	--	--	--	--	--	--	--	--	--	--	--	--	--	--	--	--	--	--	--	--	--	--	--	--	--	--
c100907_g1	SC	6.00	3.29	351	--	--	--	--	--	--	--	--	--	--	--	--	--	--	--	--	--	--	--	--	--	--	--	--	--	--	--	--
c100908_g1	SC	1.00	8.11	204	--	--	--	--	--	--	--	--	--	--	--	--	--	--	--	--	--	--	--	--	--	--	--	--	--	--	--	--
c100909_g1	SC	1.00	5.73	213	688582056	XP_009305409.1	170	1.71166e-13	PREDICTED: EGF-like module-containing mucin-like hormone receptor-like 1 [Danio rerio]	--	--	--	--	--	K06825	FBN1	fibrillin 1	http://www.genome.jp/dbget-bin/www_bget?ko:K06825	Q61554	158	3.56329e-12	Fibrillin-1 OS=Mus musculus GN=Fbn1 PE=1 SV=1	PF07645//PF00008	Calcium-binding EGF domain//EGF-like domain	--	--	GO:0005515//GO:0005509	protein binding//calcium ion binding	--	--	KOG1217	Fibrillins and related proteins containing Ca2+-binding EGF-like domains
c10090_g1	SC	15.00	2.62	626	--	--	--	--	--	--	--	--	--	--	--	--	--	--	--	--	--	--	PF15202//PF02892	Adipogenin//BED zinc finger	GO:0045444	fat cell differentiation	GO:0003677	DNA binding	--	--	--	--
c100910_g1	SC	6.00	7.62	275	--	--	--	--	--	--	--	--	--	--	--	--	--	--	--	--	--	--	--	--	--	--	--	--	--	--	--	--
c100912_g1	SC	1.00	2.12	248	--	--	--	--	--	--	--	--	--	--	--	--	--	--	--	--	--	--	--	--	--	--	--	--	--	--	--	--
c100914_g1	SC	1.00	4.82	218	--	--	--	--	--	--	--	--	--	--	--	--	--	--	--	--	--	--	--	--	--	--	--	--	--	--	--	--
c100916_g1	SC	6.00	23.85	224	--	--	--	--	--	--	--	--	--	--	--	--	--	--	--	--	--	--	--	--	--	--	--	--	--	--	--	--
c100917_g1	SC	3.00	2.42	309	--	--	--	--	--	--	--	--	--	--	--	--	--	--	--	--	--	--	--	--	--	--	--	--	--	--	--	--
c100919_g1	SC	2.00	12.81	210	--	--	--	--	--	--	--	--	--	--	--	--	--	--	--	--	--	--	--	--	--	--	--	--	--	--	--	--
c10091_g1	SC	17.00	2.17	773	--	--	--	--	--	--	--	--	--	--	--	--	--	--	--	--	--	--	--	--	--	--	--	--	--	--	--	--
c100920_g1	SC	2.00	4.98	241	--	--	--	--	--	--	--	--	--	--	--	--	--	--	--	--	--	--	--	--	--	--	--	--	--	--	--	--
c100921_g1	SC	3.00	4.60	264	--	--	--	--	--	--	--	--	--	--	--	--	--	--	--	--	--	--	--	--	--	--	--	--	--	--	--	--
c100923_g1	SC	1.00	7.19	207	--	--	--	--	--	--	--	--	--	--	--	--	--	--	--	--	--	--	--	--	--	--	--	--	--	--	--	--
c100924_g1	SC	3.00	20.74	208	--	--	--	--	--	--	--	--	--	--	--	--	--	--	--	--	--	--	--	--	--	--	--	--	--	--	--	--
c100925_g1	SC	2.00	4.86	242	--	--	--	--	--	--	--	--	--	--	--	--	--	--	--	--	--	--	--	--	--	--	--	--	--	--	--	--
c100927_g1	SC	1.00	8.11	204	--	--	--	--	--	--	--	--	--	--	--	--	--	--	--	--	--	--	--	--	--	--	--	--	--	--	--	--
c10092_g1	SC	5.00	1.42	470	--	--	--	--	--	--	--	--	--	--	--	--	--	--	--	--	--	--	--	--	--	--	--	--	--	--	--	--
c100930_g1	SC	7.00	1.38	579	779992218	XP_011670290.1	598	3.20168e-71	PREDICTED: coiled-coil domain-containing protein 77 [Strongylocentrotus purpuratus]	--	--	--	--	--	K16757	CCDC77	coiled-coil domain-containing protein 77	http://www.genome.jp/dbget-bin/www_bget?ko:K16757	Q6DFC2	465	1.95474e-53	Coiled-coil domain-containing protein 77 OS=Xenopus laevis GN=ccdc77 PE=2 SV=1	PF11365	Protein of unknown function (DUF3166)	GO:0010506	regulation of autophagy	--	--	GO:0005615	extracellular space	--	--
c100931_g1	SC	1.00	1.53	264	--	--	--	--	--	--	--	--	--	--	--	--	--	--	--	--	--	--	PF04110	Ubiquitin-like autophagy protein Apg12	GO:0000045	autophagosome assembly	--	--	GO:0005737	cytoplasm	--	--
c100932_g1	SC	3.00	10.58	228	--	--	--	--	--	--	--	--	--	--	--	--	--	--	--	--	--	--	--	--	--	--	--	--	--	--	--	--
c100933_g1	SC	2.00	11.89	212	--	--	--	--	--	--	--	--	--	--	--	--	--	--	--	--	--	--	--	--	--	--	--	--	--	--	--	--
c100935_g1	SC	1.00	1.21	278	--	--	--	--	--	--	--	--	--	--	--	--	--	--	--	--	--	--	--	--	--	--	--	--	--	--	--	--
c100936_g1	SC	1.00	4.99	217	--	--	--	--	--	--	--	--	--	--	--	--	--	--	--	--	--	--	--	--	--	--	--	--	--	--	--	--
c100938_g1	SC	4.00	2.01	363	--	--	--	--	--	--	--	--	--	--	--	--	--	--	--	--	--	--	--	--	--	--	--	--	--	--	--	--
c100941_g1	SC	1.00	4.10	223	--	--	--	--	--	--	--	--	--	--	--	--	--	--	--	--	--	--	--	--	--	--	--	--	--	--	--	--
c100943_g1	SC	1.00	3.42	229	--	--	--	--	--	--	--	--	--	--	--	--	--	--	--	--	--	--	--	--	--	--	--	--	--	--	--	--
c100944_g1	SC	4.00	1.80	379	--	--	--	--	--	--	--	--	--	--	--	--	--	--	--	--	--	--	--	--	--	--	--	--	--	--	--	--
c100946_g1	SC	2.00	6.66	230	--	--	--	--	--	--	--	--	--	--	--	--	--	--	--	--	--	--	--	--	--	--	--	--	--	--	--	--
c100947_g1	SC	3.00	3.81	275	--	--	--	--	--	--	--	--	--	--	--	--	--	--	--	--	--	--	--	--	--	--	--	--	--	--	--	--
c100948_g1	SC	1.00	7.48	206	--	--	--	--	--	--	--	--	--	--	--	--	--	--	--	--	--	--	--	--	--	--	--	--	--	--	--	--
c100949_g1	SC	2.00	17.64	202	--	--	--	--	--	--	--	--	--	--	--	--	--	--	--	--	--	--	--	--	--	--	--	--	--	--	--	--
c10094_g1	SC	3.00	18.51	211	--	--	--	--	--	--	--	--	--	--	--	--	--	--	--	--	--	--	--	--	--	--	--	--	--	--	--	--
c100950_g1	SC	1.00	1.75	257	--	--	--	--	--	--	--	--	--	--	--	--	--	--	--	--	--	--	--	--	--	--	--	--	--	--	--	--
c100951_g1	SC	1.00	1.59	262	--	--	--	--	--	--	--	--	--	--	--	--	--	--	--	--	--	--	--	--	--	--	--	--	--	--	--	--
c100952_g1	SC	1.00	4.10	223	--	--	--	--	--	--	--	--	--	--	--	--	--	--	--	--	--	--	--	--	--	--	--	--	--	--	--	--
c100953_g1	SC	3.00	3.32	284	--	--	--	--	--	--	--	--	--	--	--	--	--	--	--	--	--	--	--	--	--	--	--	--	--	--	--	--
c100954_g1	SC	4.00	3.00	316	--	--	--	--	--	--	--	--	--	--	--	--	--	--	--	--	--	--	--	--	--	--	--	--	--	--	--	--
c100955_g1	SC	5.00	21.15	222	--	--	--	--	--	--	--	--	--	--	--	--	--	--	--	--	--	--	PF11910	Cyanobacterial and plant NDH-1 subunit O	GO:0055114//GO:0006118	oxidation-reduction process//obsolete electron transport	GO:0016655	oxidoreductase activity, acting on NAD(P)H, quinone or similar compound as acceptor	GO:0005886	plasma membrane	--	--
c100956_g1	SC	1.00	4.99	217	--	--	--	--	--	--	--	--	--	--	--	--	--	--	--	--	--	--	--	--	--	--	--	--	--	--	--	--
c100957_g1	SC	2.00	16.91	203	--	--	--	--	--	--	--	--	--	--	--	--	--	--	--	--	--	--	--	--	--	--	--	--	--	--	--	--
c100958_g1	SC	3.00	3.02	291	--	--	--	--	--	--	--	--	--	--	--	--	--	--	--	--	--	--	--	--	--	--	--	--	--	--	--	--
c100959_g1	SC	5.00	2.17	385	--	--	--	--	--	--	--	--	--	--	--	--	--	--	--	--	--	--	--	--	--	--	--	--	--	--	--	--
c10095_g1	SC	8.00	2.49	449	--	--	--	--	--	--	--	--	--	--	--	--	--	--	--	--	--	--	PF02093	Gag P30 core shell protein	GO:0019068	virion assembly	--	--	--	--	--	--
c10095_g2	SC	19.00	1.93	916	780086901	XP_011673525.1	462	2.37187e-49	PREDICTED: zinc finger FYVE domain-containing protein 26 [Strongylocentrotus purpuratus]	--	--	--	--	--	--	--	--	--	D4A8G9	260	5.00186e-23	Zinc finger FYVE domain-containing protein 26 OS=Rattus norvegicus GN=Zfyve26 PE=3 SV=1	--	--	--	--	--	--	--	--	--	--
c100962_g1	SC	1.00	4.99	217	751477833	XP_011194453.1	226	1.18418e-20	PREDICTED: uncharacterized protein LOC105219820 [Bactrocera cucurbitae]	--	--	--	--	--	--	--	--	--	P10394	137	1.80595e-09	Retrovirus-related Pol polyprotein from transposon 412 OS=Drosophila melanogaster GN=POL PE=3 SV=1	--	--	--	--	--	--	--	--	KOG0017	FOG: Transposon-encoded proteins with TYA, reverse transcriptase, integrase domains in various combinations
c100963_g1	SC	1.00	0.92	298	--	--	--	--	--	--	--	--	--	--	--	--	--	--	--	--	--	--	--	--	--	--	--	--	--	--	--	--
c100964_g1	SC	1.00	6.40	210	--	--	--	--	--	--	--	--	--	--	--	--	--	--	--	--	--	--	--	--	--	--	--	--	--	--	--	--
c100965_g1	SC	1.00	7.19	207	--	--	--	--	--	--	--	--	--	--	--	--	--	--	--	--	--	--	--	--	--	--	--	--	--	--	--	--
c100966_g1	SC	1.00	5.95	212	--	--	--	--	--	--	--	--	--	--	--	--	--	--	--	--	--	--	--	--	--	--	--	--	--	--	--	--
c100968_g1	SC	2.00	7.05	228	--	--	--	--	--	--	--	--	--	--	--	--	--	--	--	--	--	--	--	--	--	--	--	--	--	--	--	--
c100969_g1	SC	6.00	1.93	441	--	--	--	--	--	--	--	--	--	--	--	--	--	--	--	--	--	--	--	--	--	--	--	--	--	--	--	--
c10096_g1	SC	12.00	2.68	538	573889994	XP_006632760.1	557	1.19442e-62	PREDICTED: pleckstrin homology domain-containing family H member 1-like [Lepisosteus oculatus]	--	--	--	--	--	--	--	--	--	Q00IB7	528	3.46908e-60	Pleckstrin homology domain-containing family H member 1 OS=Danio rerio GN=plekhh1 PE=2 SV=1	PF00784	MyTH4 domain	--	--	--	--	GO:0005856	cytoskeleton	KOG0248	Cytoplasmic protein Max-1, contains PH, MyTH4 and FERM domains
c100970_g1	SC	1.00	3.63	227	--	--	--	--	--	--	--	--	--	--	--	--	--	--	--	--	--	--	--	--	--	--	--	--	--	--	--	--
c100971_g1	SC	1.00	1.98	251	--	--	--	--	--	--	--	--	--	--	--	--	--	--	--	--	--	--	--	--	--	--	--	--	--	--	--	--
c100972_g1	SC	3.00	2.51	306	72012965	XP_782356.1	142	1.04963e-08	PREDICTED: G-protein coupled receptor moody-like [Strongylocentrotus purpuratus]	--	--	--	--	--	--	--	--	--	--	--	--	--	PF00001	7 transmembrane receptor (rhodopsin family)	GO:0007186	G-protein coupled receptor signaling pathway	GO:0004930	G-protein coupled receptor activity	GO:0016021	integral component of membrane	--	--
c100973_g1	SC	2.00	11.89	212	--	--	--	--	--	--	--	--	--	--	--	--	--	--	--	--	--	--	--	--	--	--	--	--	--	--	--	--
c100977_g1	SC	1.00	6.65	209	--	--	--	--	--	--	--	--	--	--	--	--	--	--	--	--	--	--	--	--	--	--	--	--	--	--	--	--
c100978_g1	SC	2.00	10.32	216	--	--	--	--	--	--	--	--	--	--	--	--	--	--	--	--	--	--	--	--	--	--	--	--	--	--	--	--
c100979_g1	SC	4.00	6.24	263	--	--	--	--	--	--	--	--	--	--	--	--	--	--	--	--	--	--	--	--	--	--	--	--	--	--	--	--
c100980_g1	SC	2.00	3.43	258	--	--	--	--	--	--	--	--	--	--	--	--	--	--	--	--	--	--	--	--	--	--	--	--	--	--	--	--
c100981_g1	SC	2.00	1.28	332	--	--	--	--	--	--	--	--	--	--	--	--	--	--	--	--	--	--	--	--	--	--	--	--	--	--	--	--
c100982_g1	SC	1.00	8.82	202	--	--	--	--	--	--	--	--	--	--	--	--	--	--	--	--	--	--	--	--	--	--	--	--	--	--	--	--
c100983_g1	SC	3.00	4.86	261	--	--	--	--	--	--	--	--	--	--	--	--	--	--	--	--	--	--	--	--	--	--	--	--	--	--	--	--
c100984_g1	SC	14.00	3.22	529	--	--	--	--	--	--	--	--	--	--	--	--	--	--	--	--	--	--	--	--	--	--	--	--	--	--	--	--
c100985_g1	SC	1.00	2.90	235	676467822	XP_009058012.1	154	2.10887e-10	hypothetical protein LOTGIDRAFT_182587 [Lottia gigantea]>gi|556102662|gb|ESO91314.1| hypothetical protein LOTGIDRAFT_182587 [Lottia gigantea]	--	--	--	--	--	--	--	--	--	Q8N465	124	8.32192e-08	D-2-hydroxyglutarate dehydrogenase, mitochondrial OS=Homo sapiens GN=D2HGDH PE=1 SV=3	--	--	--	--	--	--	--	--	--	--
c100986_g1	SC	5.00	6.45	274	--	--	--	--	--	--	--	--	--	--	--	--	--	--	--	--	--	--	PF00730//PF01160	HhH-GPD superfamily base excision DNA repair protein//Vertebrate endogenous opioids neuropeptide	GO:0007218//GO:0006284	neuropeptide signaling pathway//base-excision repair	--	--	--	--	--	--
c100987_g1	SC	3.00	6.79	245	780187690	XP_011662955.1	139	3.44442e-08	PREDICTED: hemicentin-1 [Strongylocentrotus purpuratus]	--	--	--	--	--	--	--	--	--	Q96RW7	119	6.68136e-07	Hemicentin-1 OS=Homo sapiens GN=HMCN1 PE=1 SV=2	PF13895	Immunoglobulin domain	--	--	GO:0005515	protein binding	--	--	KOG3515	Predicted transmembrane protein of the immunoglobulin family of cell adhesion molecules
c100988_g1	SC	1.00	2.98	234	241859540	XP_002416224.1	137	4.92797e-08	insulin receptor, putative [Ixodes scapularis]>gi|215510438|gb|EEC19891.1| insulin receptor, putative [Ixodes scapularis]	--	--	--	--	--	--	--	--	--	--	--	--	--	--	--	--	--	GO:0016301	kinase activity	--	--	--	--
c100989_g1	SC	4.00	3.63	299	--	--	--	--	--	--	--	--	--	--	--	--	--	--	--	--	--	--	--	--	--	--	--	--	--	--	--	--
c10098_g1	SC	90.00	15.44	633	--	--	--	--	--	--	--	--	--	--	--	--	--	--	--	--	--	--	--	--	--	--	--	--	--	--	--	--
c100990_g1	SC	2.00	6.47	231	--	--	--	--	--	--	--	--	--	--	--	--	--	--	--	--	--	--	--	--	--	--	--	--	--	--	--	--
c100991_g1	SC	4.00	2.82	322	--	--	--	--	--	--	--	--	--	--	--	--	--	--	--	--	--	--	--	--	--	--	--	--	--	--	--	--
c100993_g1	SC	2.00	14.96	206	--	--	--	--	--	--	--	--	--	--	--	--	--	--	--	--	--	--	--	--	--	--	--	--	--	--	--	--
c100994_g1	SC	2.00	1.05	357	148227604	NP_001086560.1	129	7.52071e-07	egl-9 family hypoxia-inducible factor 1 [Xenopus laevis]>gi|49899767|gb|AAH76808.1| Egln2-prov protein [Xenopus laevis]	--	--	--	--	--	--	--	--	--	Q91YE3	127	6.2753e-08	Egl nine homolog 1 OS=Mus musculus GN=Egln1 PE=2 SV=2	--	--	--	--	--	--	--	--	--	--
c100995_g1	SC	3.00	5.15	258	--	--	--	--	--	--	--	--	--	--	--	--	--	--	--	--	--	--	--	--	--	--	--	--	--	--	--	--
c100997_g1	SC	2.00	11.07	214	--	--	--	--	--	--	--	--	--	--	--	--	--	--	--	--	--	--	--	--	--	--	--	--	--	--	--	--
c100999_g1	SC	1.00	1.12	283	--	--	--	--	--	--	--	--	--	--	--	--	--	--	--	--	--	--	--	--	--	--	--	--	--	--	--	--
c10099_g1	SC	5.00	1.57	447	--	--	--	--	--	--	--	--	--	--	--	--	--	--	--	--	--	--	--	--	--	--	--	--	--	--	--	--
c10099_g2	SC	17.00	2.57	688	--	--	--	--	--	--	--	--	--	--	--	--	--	--	--	--	--	--	PF06480//PF10186//PF02601//PF05191	FtsH Extracellular//Vacuolar sorting 38 and autophagy-related subunit 14//Exonuclease VII, large subunit//Adenylate kinase, active site lid	GO:0006144//GO:0010508//GO:0046034//GO:0006308	purine nucleobase metabolic process//positive regulation of autophagy//ATP metabolic process//DNA catabolic process	GO:0008270//GO:0004222//GO:0004017//GO:0008855//GO:0005524	zinc ion binding//metalloendopeptidase activity//adenylate kinase activity//exodeoxyribonuclease VII activity//ATP binding	GO:0009318//GO:0016021	exodeoxyribonuclease VII complex//integral component of membrane	--	--
c1009_g1	SC	8.00	3.02	409	--	--	--	--	--	--	--	--	--	--	--	--	--	--	--	--	--	--	--	--	--	--	--	--	--	--	--	--
c100_g1	SC	2.00	1.24	336	--	--	--	--	--	--	--	--	--	--	--	--	--	--	--	--	--	--	--	--	--	--	--	--	--	--	--	--
c101000_g1	SC	2.00	10.68	215	780160019	XP_001199021.2	244	8.52452e-23	PREDICTED: uncharacterized protein LOC763141 [Strongylocentrotus purpuratus]	--	--	--	--	--	--	--	--	--	Q6ZUG5	115	1.01571e-06	Uncharacterized protein FLJ43738 OS=Homo sapiens PE=2 SV=1	--	--	--	--	--	--	--	--	--	--
c101002_g1	SC	5.00	14.90	234	--	--	--	--	--	--	--	--	--	--	--	--	--	--	--	--	--	--	--	--	--	--	--	--	--	--	--	--
c101003_g1	SC	6.00	2.97	365	--	--	--	--	--	--	--	--	--	--	--	--	--	--	--	--	--	--	--	--	--	--	--	--	--	--	--	--
c101005_g1	SC	3.00	1.60	355	--	--	--	--	--	--	--	--	--	--	--	--	--	--	--	--	--	--	--	--	--	--	--	--	--	--	--	--
c101006_g1	SC	1.00	0.83	307	--	--	--	--	--	--	--	--	--	--	--	--	--	--	--	--	--	--	--	--	--	--	--	--	--	--	--	--
c101007_g1	SC	1.00	5.95	212	--	--	--	--	--	--	--	--	--	--	--	--	--	--	--	--	--	--	--	--	--	--	--	--	--	--	--	--
c101008_g1	SC	3.00	2.27	315	--	--	--	--	--	--	--	--	--	--	--	--	--	--	--	--	--	--	--	--	--	--	--	--	--	--	--	--
c101009_g1	SC	2.00	2.15	286	--	--	--	--	--	--	--	--	--	--	--	--	--	--	--	--	--	--	--	--	--	--	--	--	--	--	--	--
c10100_g1	SC	3.00	1.70	347	--	--	--	--	--	--	--	--	--	--	--	--	--	--	--	--	--	--	--	--	--	--	--	--	--	--	--	--
c101010_g1	SC	3.00	26.45	202	--	--	--	--	--	--	--	--	--	--	--	--	--	--	--	--	--	--	--	--	--	--	--	--	--	--	--	--
c101011_g1	SC	8.00	2.24	474	260798294	XP_002594135.1	279	1.27579e-25	hypothetical protein BRAFLDRAFT_68423 [Branchiostoma floridae]>gi|229279368|gb|EEN50146.1| hypothetical protein BRAFLDRAFT_68423 [Branchiostoma floridae]	--	--	--	--	--	K16725	CEP192	centrosomal protein CEP192	http://www.genome.jp/dbget-bin/www_bget?ko:K16725	Q8TEP8	247	8.67227e-23	Centrosomal protein of 192 kDa OS=Homo sapiens GN=CEP192 PE=1 SV=2	PF00345	Pili and flagellar-assembly chaperone, PapD N-terminal domain	GO:0071555	cell wall organization	--	--	GO:0030288	outer membrane-bounded periplasmic space	--	--
c101015_g1	SC	2.00	2.50	276	--	--	--	--	--	--	--	--	--	--	--	--	--	--	--	--	--	--	--	--	--	--	--	--	--	--	--	--
c101016_g1	SC	2.00	7.26	227	--	--	--	--	--	--	--	--	--	--	--	--	--	--	--	--	--	--	--	--	--	--	--	--	--	--	--	--
c101017_g1	SC	1.00	3.85	225	--	--	--	--	--	--	--	--	--	--	--	--	--	--	--	--	--	--	--	--	--	--	--	--	--	--	--	--
c101018_g1	SC	1.00	1.79	256	--	--	--	--	--	--	--	--	--	--	--	--	--	--	--	--	--	--	--	--	--	--	--	--	--	--	--	--
c101019_g1	SC	2.00	2.96	266	--	--	--	--	--	--	--	--	--	--	--	--	--	--	--	--	--	--	--	--	--	--	--	--	--	--	--	--
c10101_g1	SC	143.00	4.23	2600	251752830	BAH83665.1	3028	0	minichromosome maintenance 7 [Patiria pectinifera]	505846181	XM_004616511.1	37	3.17769e-07	PREDICTED: Sorex araneus minichromosome maintenance complex component 6 (MCM6), mRNA	K02210	MCM7, CDC47	DNA replication licensing factor MCM7	http://www.genome.jp/dbget-bin/www_bget?ko:K02210	Q7ZXB1	2735	0	DNA replication licensing factor mcm7-B OS=Xenopus laevis GN=mcm7-b PE=2 SV=1	PF07726//PF07728//PF00158//PF00493	ATPase family associated with various cellular activities (AAA)//AAA domain (dynein-related subfamily)//Sigma-54 interaction domain//MCM2/3/5 family	GO:0006355//GO:0006260	regulation of transcription, DNA-templated//DNA replication	GO:0016887//GO:0003677//GO:0008134//GO:0005524	ATPase activity//DNA binding//transcription factor binding//ATP binding	GO:0005667	transcription factor complex	KOG0482	DNA replication licensing factor, MCM7 component
c101020_g1	SC	1.00	3.97	224	--	--	--	--	--	--	--	--	--	--	--	--	--	--	--	--	--	--	--	--	--	--	--	--	--	--	--	--
c101022_g1	SC	2.00	4.75	243	--	--	--	--	--	--	--	--	--	--	--	--	--	--	--	--	--	--	--	--	--	--	--	--	--	--	--	--
c101023_g1	SC	1.00	5.73	213	--	--	--	--	--	--	--	--	--	--	--	--	--	--	--	--	--	--	--	--	--	--	--	--	--	--	--	--
c101024_g1	SC	2.00	3.50	257	--	--	--	--	--	--	--	--	--	--	--	--	--	--	--	--	--	--	--	--	--	--	--	--	--	--	--	--
c101025_g1	SC	1.00	7.79	205	--	--	--	--	--	--	--	--	--	--	--	--	--	--	--	--	--	--	--	--	--	--	--	--	--	--	--	--
c101026_g1	SC	2.00	5.96	234	780154042	XP_011682117.1	196	5.41812e-16	PREDICTED: meckelin [Strongylocentrotus purpuratus]	--	--	--	--	--	K19348	TMEM67, MKS3	meckelin	http://www.genome.jp/dbget-bin/www_bget?ko:K19348	Q5HYA8	177	8.98956e-15	Meckelin OS=Homo sapiens GN=TMEM67 PE=1 SV=2	PF07195//PF09773	Flagellar hook-associated protein 2 C-terminus//Meckelin (Transmembrane protein 67)	GO:0007155//GO:0010826//GO:0042384	cell adhesion//negative regulation of centrosome duplication//cilium assembly	--	--	GO:0036038//GO:0009288	TCTN-B9D complex//bacterial-type flagellum	--	--
c101027_g1	SC	2.00	5.11	240	780183337	XP_782724.3	301	5.25522e-31	PREDICTED: rRNA methyltransferase 3, mitochondrial [Strongylocentrotus purpuratus]	--	--	--	--	--	--	--	--	--	Q9HC36	286	2.58965e-30	rRNA methyltransferase 3, mitochondrial OS=Homo sapiens GN=RNMTL1 PE=1 SV=2	PF00588	SpoU rRNA Methylase family	GO:0006396//GO:0009451	RNA processing//RNA modification	GO:0003723//GO:0008173	RNA binding//RNA methyltransferase activity	--	--	KOG2506	SpoU rRNA Methylase family protein
c101029_g1	SC	1.00	7.79	205	--	--	--	--	--	--	--	--	--	--	--	--	--	--	--	--	--	--	--	--	--	--	--	--	--	--	--	--
c10102_g1	SC	14.00	1.81	766	--	--	--	--	--	--	--	--	--	--	--	--	--	--	--	--	--	--	PF04082	Fungal specific transcription factor domain	GO:0006351	transcription, DNA-templated	GO:0008270//GO:0003677	zinc ion binding//DNA binding	GO:0005634	nucleus	--	--
c101030_g1	SC	4.00	5.61	269	--	--	--	--	--	--	--	--	--	--	--	--	--	--	--	--	--	--	--	--	--	--	--	--	--	--	--	--
c101031_g1	SC	3.00	1.86	336	780031178	XP_011666698.1	206	5.32765e-17	PREDICTED: coiled-coil domain-containing protein 138 [Strongylocentrotus purpuratus]	--	--	--	--	--	--	--	--	--	Q0VF22	178	1.84124e-14	Coiled-coil domain-containing protein 138 OS=Mus musculus GN=Ccdc138 PE=2 SV=1	PF11744//PF10018//PF04687//PF04111//PF06156	Aluminium activated malate transporter//Vitamin-D-receptor interacting Mediator subunit 4//Microvirus H protein (pilot protein)//Autophagy protein Apg6//Protein of unknown function (DUF972)	GO:0006914//GO:0015743//GO:0006260//GO:0006357//GO:0046718	autophagy//malate transport//DNA replication//regulation of transcription from RNA polymerase II promoter//viral entry into host cell	GO:0001104	RNA polymerase II transcription cofactor activity	GO:0019028//GO:0016592	viral capsid//mediator complex	--	--
c101032_g1	SC	1.00	3.15	232	--	--	--	--	--	--	--	--	--	--	--	--	--	--	--	--	--	--	--	--	--	--	--	--	--	--	--	--
c101033_g1	SC	2.00	7.48	226	--	--	--	--	--	--	--	--	--	--	--	--	--	--	--	--	--	--	--	--	--	--	--	--	--	--	--	--
c101034_g1	SC	2.00	3.57	256	--	--	--	--	--	--	--	--	--	--	--	--	--	--	--	--	--	--	--	--	--	--	--	--	--	--	--	--
c101036_g1	SC	2.00	10.32	216	--	--	--	--	--	--	--	--	--	--	--	--	--	--	--	--	--	--	--	--	--	--	--	--	--	--	--	--
c101038_g1	SC	1.00	8.82	202	--	--	--	--	--	--	--	--	--	--	--	--	--	--	--	--	--	--	--	--	--	--	--	--	--	--	--	--
c101039_g1	SC	2.00	3.88	252	780107018	XP_011675984.1	363	4.99734e-38	PREDICTED: cilia- and flagella-associated protein 74 [Strongylocentrotus purpuratus]	--	--	--	--	--	--	--	--	--	--	--	--	--	--	--	--	--	--	--	--	--	--	--
c10103_g1	SC	24.00	4.46	601	--	--	--	--	--	--	--	--	--	--	--	--	--	--	--	--	--	--	--	--	--	--	--	--	--	--	--	--
c101041_g1	SC	1.00	8.11	204	--	--	--	--	--	--	--	--	--	--	--	--	--	--	--	--	--	--	--	--	--	--	--	--	--	--	--	--
c101042_g1	SC	2.00	2.35	280	--	--	--	--	--	--	--	--	--	--	--	--	--	--	--	--	--	--	--	--	--	--	--	--	--	--	--	--
c101044_g1	SC	2.00	8.20	223	--	--	--	--	--	--	--	--	--	--	--	--	--	--	--	--	--	--	--	--	--	--	--	--	--	--	--	--
c101045_g1	SC	5.00	2.24	380	--	--	--	--	--	--	--	--	--	--	--	--	--	--	--	--	--	--	--	--	--	--	--	--	--	--	--	--
c101046_g1	SC	3.00	0.60	575	--	--	--	--	--	--	--	--	--	--	--	--	--	--	--	--	--	--	--	--	--	--	--	--	--	--	--	--
c101047_g1	SC	2.00	15.57	205	--	--	--	--	--	--	--	--	--	--	--	--	--	--	--	--	--	--	--	--	--	--	--	--	--	--	--	--
c101048_g1	SC	3.00	2.20	318	--	--	--	--	--	--	--	--	--	--	--	--	--	--	--	--	--	--	--	--	--	--	--	--	--	--	--	--
c101049_g1	SC	10.00	3.74	411	260829681	XP_002609790.1	209	1.0459e-16	hypothetical protein BRAFLDRAFT_78622 [Branchiostoma floridae]>gi|229295152|gb|EEN65800.1| hypothetical protein BRAFLDRAFT_78622 [Branchiostoma floridae]	--	--	--	--	--	--	--	--	--	--	--	--	--	--	--	--	--	--	--	--	--	--	--
c10104_g1	SC	1.00	1.56	263	--	--	--	--	--	--	--	--	--	--	--	--	--	--	--	--	--	--	--	--	--	--	--	--	--	--	--	--
c101050_g1	SC	1.00	0.85	305	--	--	--	--	--	--	--	--	--	--	--	--	--	--	--	--	--	--	--	--	--	--	--	--	--	--	--	--
c101053_g1	SC	3.00	3.10	289	--	--	--	--	--	--	--	--	--	--	--	--	--	--	--	--	--	--	--	--	--	--	--	--	--	--	--	--
c101054_g1	SC	2.00	3.57	256	--	--	--	--	--	--	--	--	--	--	--	--	--	--	--	--	--	--	--	--	--	--	--	--	--	--	--	--
c101055_g1	SC	1.00	2.68	238	--	--	--	--	--	--	--	--	--	--	--	--	--	--	--	--	--	--	--	--	--	--	--	--	--	--	--	--
c101056_g1	SC	2.00	7.48	226	--	--	--	--	--	--	--	--	--	--	--	--	--	--	--	--	--	--	--	--	--	--	--	--	--	--	--	--
c101058_g1	SC	1.00	2.12	248	--	--	--	--	--	--	--	--	--	--	--	--	--	--	--	--	--	--	--	--	--	--	--	--	--	--	--	--
c101059_g1	SC	4.00	2.44	338	--	--	--	--	--	--	--	--	--	--	--	--	--	--	--	--	--	--	--	--	--	--	--	--	--	--	--	--
c10105_g1	SC	3.00	0.85	472	--	--	--	--	--	--	--	--	--	--	--	--	--	--	--	--	--	--	--	--	--	--	--	--	--	--	--	--
c101060_g1	SC	1.00	0.99	292	--	--	--	--	--	--	--	--	--	--	--	--	--	--	--	--	--	--	--	--	--	--	--	--	--	--	--	--
c101061_g1	SC	2.00	3.12	263	--	--	--	--	--	--	--	--	--	--	--	--	--	--	--	--	--	--	PF01251	Ribosomal protein S7e	GO:0042254//GO:0006412	ribosome biogenesis//translation	GO:0003735	structural constituent of ribosome	GO:0005840//GO:0005622	ribosome//intracellular	--	--
c101062_g1	SC	4.00	1.69	389	--	--	--	--	--	--	--	--	--	--	--	--	--	--	--	--	--	--	--	--	--	--	--	--	--	--	--	--
c101064_g1	SC	2.00	5.96	234	--	--	--	--	--	--	--	--	--	--	--	--	--	--	--	--	--	--	--	--	--	--	--	--	--	--	--	--
c101065_g1	SC	1.00	1.94	252	--	--	--	--	--	--	--	--	--	--	--	--	--	--	--	--	--	--	--	--	--	--	--	--	--	--	--	--
c101066_g1	SC	2.00	4.86	242	--	--	--	--	--	--	--	--	--	--	--	--	--	--	--	--	--	--	--	--	--	--	--	--	--	--	--	--
c101067_g1	SC	2.00	9.02	220	--	--	--	--	--	--	--	--	--	--	--	--	--	--	--	--	--	--	--	--	--	--	--	--	--	--	--	--
c101069_g1	SC	4.00	3.09	313	--	--	--	--	--	--	--	--	--	--	--	--	--	--	--	--	--	--	--	--	--	--	--	--	--	--	--	--
c10106_g1	SC	32.00	3.37	890	--	--	--	--	--	--	--	--	--	--	--	--	--	--	--	--	--	--	--	--	--	--	--	--	--	--	--	--
c101070_g1	SC	1.00	7.48	206	--	--	--	--	--	--	--	--	--	--	--	--	--	--	--	--	--	--	--	--	--	--	--	--	--	--	--	--
c101071_g1	SC	2.00	2.81	269	--	--	--	--	--	--	--	--	--	--	--	--	--	--	--	--	--	--	--	--	--	--	--	--	--	--	--	--
c101073_g1	SC	2.00	15.57	205	--	--	--	--	--	--	--	--	--	--	--	--	--	--	--	--	--	--	--	--	--	--	--	--	--	--	--	--
c101074_g1	SC	2.00	5.11	240	--	--	--	--	--	--	--	--	--	--	--	--	--	--	--	--	--	--	--	--	--	--	--	--	--	--	--	--
c101075_g1	SC	1.00	8.45	203	--	--	--	--	--	--	--	--	--	--	--	--	--	--	--	--	--	--	--	--	--	--	--	--	--	--	--	--
c101077_g1	SC	2.00	2.09	288	--	--	--	--	--	--	--	--	--	--	--	--	--	--	--	--	--	--	--	--	--	--	--	--	--	--	--	--
c101078_g1	SC	3.00	3.02	291	--	--	--	--	--	--	--	--	--	--	--	--	--	--	--	--	--	--	--	--	--	--	--	--	--	--	--	--
c101079_g1	SC	1.00	6.91	208	--	--	--	--	--	--	--	--	--	--	--	--	--	--	--	--	--	--	--	--	--	--	--	--	--	--	--	--
c10107_g1	SC	44.00	8.64	581	--	--	--	--	--	--	--	--	--	--	--	--	--	--	--	--	--	--	--	--	--	--	--	--	--	--	--	--
c101080_g1	SC	3.00	8.26	237	--	--	--	--	--	--	--	--	--	--	--	--	--	--	--	--	--	--	--	--	--	--	--	--	--	--	--	--
c101081_g1	SC	2.00	9.02	220	--	--	--	--	--	--	--	--	--	--	--	--	--	--	--	--	--	--	--	--	--	--	--	--	--	--	--	--
c101082_g1	SC	1.00	1.31	273	--	--	--	--	--	--	--	--	--	--	--	--	--	--	--	--	--	--	--	--	--	--	--	--	--	--	--	--
c101083_g1	SC	1.00	4.51	220	--	--	--	--	--	--	--	--	--	--	--	--	--	--	--	--	--	--	--	--	--	--	--	--	--	--	--	--
c101084_g1	SC	1.00	2.55	240	--	--	--	--	--	--	--	--	--	--	--	--	--	--	--	--	--	--	--	--	--	--	--	--	--	--	--	--
c101085_g1	SC	10.00	3.33	434	--	--	--	--	--	--	--	--	--	--	--	--	--	--	--	--	--	--	PF01701	Photosystem I reaction centre subunit IX / PsaJ	GO:0015979	photosynthesis	--	--	GO:0009522	photosystem I	--	--
c101088_g1	SC	4.00	2.13	355	--	--	--	--	--	--	--	--	--	--	--	--	--	--	--	--	--	--	--	--	--	--	--	--	--	--	--	--
c10108_g1	SC	3.00	3.19	287	--	--	--	--	--	--	--	--	--	--	--	--	--	--	--	--	--	--	--	--	--	--	--	--	--	--	--	--
c101090_g1	SC	1.00	6.65	209	--	--	--	--	--	--	--	--	--	--	--	--	--	--	--	--	--	--	--	--	--	--	--	--	--	--	--	--
c101092_g1	SC	3.00	9.44	232	--	--	--	--	--	--	--	--	--	--	--	--	--	--	--	--	--	--	--	--	--	--	--	--	--	--	--	--
c101093_g1	SC	1.00	3.42	229	--	--	--	--	--	--	--	--	--	--	--	--	--	--	--	--	--	--	--	--	--	--	--	--	--	--	--	--
c101094_g1	SC	5.00	2.97	341	--	--	--	--	--	--	--	--	--	--	--	--	--	--	--	--	--	--	PF08490	Domain of unknown function (DUF1744)	GO:0006260	DNA replication	GO:0008270//GO:0003887	zinc ion binding//DNA-directed DNA polymerase activity	GO:0042575//GO:0005634	DNA polymerase complex//nucleus	--	--
c101095_g1	SC	2.00	6.85	229	--	--	--	--	--	--	--	--	--	--	--	--	--	--	--	--	--	--	--	--	--	--	--	--	--	--	--	--
c101096_g1	SC	4.00	2.13	355	528505000	XP_005158482.1	364	1.40102e-37	PREDICTED: uncharacterized protein LOC101886504 [Danio rerio]	--	--	--	--	--	--	--	--	--	--	--	--	--	--	--	--	--	--	--	--	--	--	--
c101098_g1	SC	3.00	2.20	318	--	--	--	--	--	--	--	--	--	--	--	--	--	--	--	--	--	--	--	--	--	--	--	--	--	--	--	--
c10109_g1	SC	8.00	3.80	371	--	--	--	--	--	--	--	--	--	--	--	--	--	--	--	--	--	--	--	--	--	--	--	--	--	--	--	--
c10109_g2	SC	3.00	2.54	305	--	--	--	--	--	--	--	--	--	--	--	--	--	--	--	--	--	--	--	--	--	--	--	--	--	--	--	--
c1010_g1	SC	3.00	1.81	339	--	--	--	--	--	--	--	--	--	--	--	--	--	--	--	--	--	--	PF01736	Polyomavirus agnoprotein	--	--	GO:0003677	DNA binding	--	--	--	--
c101100_g1	SC	1.00	5.95	212	--	--	--	--	--	--	--	--	--	--	--	--	--	--	--	--	--	--	--	--	--	--	--	--	--	--	--	--
c101101_g1	SC	5.00	3.07	337	390366184	XP_797574.2	294	1.61223e-29	PREDICTED: arylacetamide deacetylase [Strongylocentrotus purpuratus]	--	--	--	--	--	K13616	AADAC	arylacetamide deacetylase	http://www.genome.jp/dbget-bin/www_bget?ko:K13616	Q7M370	145	2.14887e-10	Arylacetamide deacetylase OS=Oryctolagus cuniculus GN=AADAC PE=1 SV=1	PF07859	alpha/beta hydrolase fold	GO:0008152	metabolic process	GO:0016787	hydrolase activity	--	--	KOG1515	Arylacetamide deacetylase
c101102_g1	SC	4.00	3.59	300	--	--	--	--	--	--	--	--	--	--	--	--	--	--	--	--	--	--	--	--	--	--	--	--	--	--	--	--
c101103_g1	SC	3.00	4.21	269	--	--	--	--	--	--	--	--	--	--	--	--	--	--	--	--	--	--	--	--	--	--	--	--	--	--	--	--
c101104_g1	SC	10.00	6.09	338	--	--	--	--	--	--	--	--	--	--	--	--	--	--	--	--	--	--	--	--	--	--	--	--	--	--	--	--
c101105_g1	SC	7.00	2.27	440	--	--	--	--	--	--	--	--	--	--	--	--	--	--	--	--	--	--	--	--	--	--	--	--	--	--	--	--
c101106_g1	SC	2.00	12.81	210	--	--	--	--	--	--	--	--	--	--	--	--	--	--	--	--	--	--	--	--	--	--	--	--	--	--	--	--
c101107_g1	SC	1.00	4.51	220	--	--	--	--	--	--	--	--	--	--	--	--	--	--	--	--	--	--	--	--	--	--	--	--	--	--	--	--
c101108_g1	SC	2.00	6.85	229	--	--	--	--	--	--	--	--	--	--	--	--	--	--	--	--	--	--	--	--	--	--	--	--	--	--	--	--
c101109_g1	SC	6.00	4.19	323	--	--	--	--	--	--	--	--	--	--	--	--	--	--	--	--	--	--	--	--	--	--	--	--	--	--	--	--
c10110_g1	SC	25.00	2.46	939	--	--	--	--	--	--	--	--	--	--	--	--	--	--	--	--	--	--	--	--	--	--	--	--	--	--	--	--
c101110_g1	SC	4.00	2.32	344	--	--	--	--	--	--	--	--	--	--	--	--	--	--	--	--	--	--	PF01022	Bacterial regulatory protein, arsR family	GO:0006355	regulation of transcription, DNA-templated	GO:0003700	transcription factor activity, sequence-specific DNA binding	GO:0005667	transcription factor complex	--	--
c101112_g1	SC	1.00	6.91	208	--	--	--	--	--	--	--	--	--	--	--	--	--	--	--	--	--	--	--	--	--	--	--	--	--	--	--	--
c101113_g1	SC	3.00	4.51	265	--	--	--	--	--	--	--	--	--	--	--	--	--	--	--	--	--	--	--	--	--	--	--	--	--	--	--	--
c101115_g1	SC	2.00	7.95	224	--	--	--	--	--	--	--	--	--	--	--	--	--	--	--	--	--	--	--	--	--	--	--	--	--	--	--	--
c101116_g1	SC	2.00	11.47	213	--	--	--	--	--	--	--	--	--	--	--	--	--	--	--	--	--	--	--	--	--	--	--	--	--	--	--	--
c101117_g1	SC	3.00	11.56	225	--	--	--	--	--	--	--	--	--	--	--	--	--	--	--	--	--	--	--	--	--	--	--	--	--	--	--	--
c101119_g1	SC	3.00	1.44	369	472344345	XP_004391919.1	188	2.02697e-14	PREDICTED: platelet glycoprotein V [Odobenus rosmarus divergens]	--	--	--	--	--	K07523	LRRC4C, NGL1	netrin-G1 ligand	http://www.genome.jp/dbget-bin/www_bget?ko:K07523	O08742	162	2.68414e-12	Platelet glycoprotein V OS=Mus musculus GN=Gp5 PE=3 SV=1	PF13855//PF00560	Leucine rich repeat//Leucine Rich Repeat	--	--	GO:0005515	protein binding	--	--	KOG4237	Extracellular matrix protein slit, contains leucine-rich and EGF-like repeats
c101120_g1	SC	1.00	3.06	233	780110636	XP_011676442.1	132	1.30689e-07	PREDICTED: fibropellin-3 [Strongylocentrotus purpuratus]	--	--	--	--	--	--	--	--	--	--	--	--	--	PF00008	EGF-like domain	--	--	GO:0005515	protein binding	--	--	--	--
c101121_g1	SC	5.00	2.83	347	780013913	XP_011664164.1	378	1.06082e-39	PREDICTED: condensin-2 complex subunit G2 [Strongylocentrotus purpuratus]	--	--	--	--	--	K11492	NCAPG2, LUZP5	condensin-2 complex subunit G2	http://www.genome.jp/dbget-bin/www_bget?ko:K11492	Q86XI2	227	7.9513e-21	Condensin-2 complex subunit G2 OS=Homo sapiens GN=NCAPG2 PE=1 SV=1	--	--	--	--	--	--	--	--	--	--
c101122_g1	SC	3.00	6.64	246	--	--	--	--	--	--	--	--	--	--	--	--	--	--	--	--	--	--	--	--	--	--	--	--	--	--	--	--
c101123_g1	SC	2.00	2.42	278	--	--	--	--	--	--	--	--	--	--	--	--	--	--	--	--	--	--	--	--	--	--	--	--	--	--	--	--
c101124_g1	SC	2.00	6.47	231	--	--	--	--	--	--	--	--	--	--	--	--	--	--	--	--	--	--	--	--	--	--	--	--	--	--	--	--
c101125_g1	SC	10.00	7.13	321	--	--	--	--	--	--	--	--	--	--	--	--	--	--	--	--	--	--	--	--	--	--	--	--	--	--	--	--
c101126_g1	SC	1.00	1.56	263	--	--	--	--	--	--	--	--	--	--	--	--	--	--	--	--	--	--	--	--	--	--	--	--	--	--	--	--
c101127_g1	SC	2.00	5.51	237	--	--	--	--	--	--	--	--	--	--	--	--	--	--	--	--	--	--	--	--	--	--	--	--	--	--	--	--
c101128_g1	SC	1.00	2.43	242	--	--	--	--	--	--	--	--	--	--	--	--	--	--	--	--	--	--	--	--	--	--	--	--	--	--	--	--
c101129_g1	SC	1.00	2.32	244	--	--	--	--	--	--	--	--	--	--	--	--	--	--	--	--	--	--	--	--	--	--	--	--	--	--	--	--
c10112_g1	SC	11.00	3.77	428	780103106	XP_792445.4	228	2.96774e-19	PREDICTED: anaphase-promoting complex subunit 5 isoform X1 [Strongylocentrotus purpuratus]>gi|780103112|ref|XP_011675516.1| PREDICTED: anaphase-promoting complex subunit 5 isoform X2 [Strongylocentrotus purpuratus]	--	--	--	--	--	K03352	APC5	anaphase-promoting complex subunit 5	http://www.genome.jp/dbget-bin/www_bget?ko:K03352	--	--	--	--	--	--	--	--	--	--	--	--	--	--
c101130_g1	SC	2.00	3.96	251	--	--	--	--	--	--	--	--	--	--	--	--	--	--	--	--	--	--	--	--	--	--	--	--	--	--	--	--
c101131_g1	SC	1.00	2.90	235	--	--	--	--	--	--	--	--	--	--	--	--	--	--	--	--	--	--	--	--	--	--	--	--	--	--	--	--
c101134_g1	SC	3.00	2.04	326	--	--	--	--	--	--	--	--	--	--	--	--	--	--	--	--	--	--	--	--	--	--	--	--	--	--	--	--
c101135_g1	SC	1.00	2.75	237	--	--	--	--	--	--	--	--	--	--	--	--	--	--	--	--	--	--	--	--	--	--	--	--	--	--	--	--
c101136_g1	SC	5.00	6.78	271	--	--	--	--	--	--	--	--	--	--	--	--	--	--	--	--	--	--	--	--	--	--	--	--	--	--	--	--
c101137_g1	SC	1.00	4.37	221	--	--	--	--	--	--	--	--	--	--	--	--	--	--	--	--	--	--	--	--	--	--	--	--	--	--	--	--
c101138_g1	SC	2.00	4.43	246	--	--	--	--	--	--	--	--	--	--	--	--	--	--	--	--	--	--	--	--	--	--	--	--	--	--	--	--
c101139_g1	SC	1.00	5.34	215	--	--	--	--	--	--	--	--	--	--	--	--	--	--	--	--	--	--	--	--	--	--	--	--	--	--	--	--
c10113_g1	SC	8.00	4.64	344	--	--	--	--	--	--	--	--	--	--	--	--	--	--	--	--	--	--	--	--	--	--	--	--	--	--	--	--
c101140_g1	SC	1.00	8.82	202	--	--	--	--	--	--	--	--	--	--	--	--	--	--	--	--	--	--	PF00067	Cytochrome P450	GO:0055114	oxidation-reduction process	GO:0020037//GO:0016705//GO:0005506	heme binding//oxidoreductase activity, acting on paired donors, with incorporation or reduction of molecular oxygen//iron ion binding	--	--	--	--
c101141_g1	SC	1.00	1.72	258	--	--	--	--	--	--	--	--	--	--	--	--	--	--	--	--	--	--	--	--	--	--	--	--	--	--	--	--
c101142_g1	SC	10.00	6.60	329	--	--	--	--	--	--	--	--	--	--	--	--	--	--	--	--	--	--	--	--	--	--	--	--	--	--	--	--
c101143_g1	SC	2.00	12.81	210	--	--	--	--	--	--	--	--	--	--	--	--	--	--	--	--	--	--	--	--	--	--	--	--	--	--	--	--
c101144_g1	SC	4.00	1.54	406	--	--	--	--	--	--	--	--	--	--	--	--	--	--	--	--	--	--	--	--	--	--	--	--	--	--	--	--
c101145_g1	SC	1.00	1.98	251	780171646	XP_011660653.1	187	1.5117e-14	PREDICTED: centromere-associated protein E [Strongylocentrotus purpuratus]	--	--	--	--	--	--	--	--	--	A6QPL4	118	5.97035e-07	Kinesin-like protein KIF22 OS=Bos taurus GN=KIF22 PE=2 SV=2	PF00225	Kinesin motor domain	GO:0007018//GO:0007017	microtubule-based movement//microtubule-based process	GO:0005524//GO:0008017//GO:0003777	ATP binding//microtubule binding//microtubule motor activity	GO:0005874//GO:0045298	microtubule//tubulin complex	KOG0242	Kinesin-like protein
c101146_g1	SC	1.00	2.68	238	--	--	--	--	--	--	--	--	--	--	--	--	--	--	--	--	--	--	--	--	--	--	--	--	--	--	--	--
c101147_g1	SC	1.00	1.86	254	--	--	--	--	--	--	--	--	--	--	--	--	--	--	--	--	--	--	--	--	--	--	--	--	--	--	--	--
c101148_g1	SC	2.00	1.31	330	--	--	--	--	--	--	--	--	--	--	--	--	--	--	--	--	--	--	--	--	--	--	--	--	--	--	--	--
c101149_g1	SC	1.00	6.40	210	--	--	--	--	--	--	--	--	--	--	--	--	--	--	--	--	--	--	--	--	--	--	--	--	--	--	--	--
c10114_g1	SC	1.00	4.66	219	--	--	--	--	--	--	--	--	--	--	--	--	--	--	--	--	--	--	--	--	--	--	--	--	--	--	--	--
c101150_g1	SC	1.00	4.10	223	--	--	--	--	--	--	--	--	--	--	--	--	--	--	--	--	--	--	--	--	--	--	--	--	--	--	--	--
c101152_g1	SC	2.00	1.65	307	--	--	--	--	--	--	--	--	--	--	--	--	--	--	--	--	--	--	--	--	--	--	--	--	--	--	--	--
c101153_g1	SC	4.00	6.60	260	--	--	--	--	--	--	--	--	--	--	--	--	--	--	--	--	--	--	--	--	--	--	--	--	--	--	--	--
c101154_g1	SC	1.00	1.98	251	--	--	--	--	--	--	--	--	--	--	--	--	--	--	--	--	--	--	--	--	--	--	--	--	--	--	--	--
c101156_g1	SC	2.00	7.05	228	--	--	--	--	--	--	--	--	--	--	--	--	--	--	--	--	--	--	--	--	--	--	--	--	--	--	--	--
c101157_g1	SC	2.00	9.32	219	--	--	--	--	--	--	--	--	--	--	--	--	--	--	--	--	--	--	--	--	--	--	--	--	--	--	--	--
c101158_g1	SC	2.00	4.75	243	--	--	--	--	--	--	--	--	--	--	--	--	--	--	--	--	--	--	--	--	--	--	--	--	--	--	--	--
c101159_g1	SC	1.00	6.91	208	--	--	--	--	--	--	--	--	--	--	--	--	--	--	--	--	--	--	--	--	--	--	--	--	--	--	--	--
c101160_g1	SC	3.00	3.19	287	--	--	--	--	--	--	--	--	--	--	--	--	--	--	--	--	--	--	--	--	--	--	--	--	--	--	--	--
c101161_g1	SC	1.00	4.66	219	72165794	XP_800551.1	243	8.17809e-23	PREDICTED: uncharacterized protein C19orf45 [Strongylocentrotus purpuratus]	--	--	--	--	--	--	--	--	--	--	--	--	--	--	--	--	--	--	--	--	--	--	--
c101162_g1	SC	1.00	4.66	219	--	--	--	--	--	--	--	--	--	--	--	--	--	--	--	--	--	--	--	--	--	--	--	--	--	--	--	--
c101163_g1	SC	2.00	6.29	232	--	--	--	--	--	--	--	--	--	--	--	--	--	--	--	--	--	--	--	--	--	--	--	--	--	--	--	--
c101164_g1	SC	3.00	2.66	301	--	--	--	--	--	--	--	--	--	--	--	--	--	--	--	--	--	--	--	--	--	--	--	--	--	--	--	--
c101165_g1	SC	2.00	11.07	214	--	--	--	--	--	--	--	--	--	--	--	--	--	--	--	--	--	--	--	--	--	--	--	--	--	--	--	--
c101168_g1	SC	1.00	5.73	213	--	--	--	--	--	--	--	--	--	--	--	--	--	--	--	--	--	--	--	--	--	--	--	--	--	--	--	--
c101169_g1	SC	4.00	5.42	271	--	--	--	--	--	--	--	--	--	--	--	--	--	--	--	--	--	--	--	--	--	--	--	--	--	--	--	--
c10116_g1	SC	8.00	4.71	342	--	--	--	--	--	--	--	--	--	--	--	--	--	--	--	--	--	--	--	--	--	--	--	--	--	--	--	--
c101170_g1	SC	1.00	4.51	220	--	--	--	--	--	--	--	--	--	--	--	--	--	--	--	--	--	--	--	--	--	--	--	--	--	--	--	--
c101171_g1	SC	1.00	2.16	247	--	--	--	--	--	--	--	--	--	--	--	--	--	--	--	--	--	--	--	--	--	--	--	--	--	--	--	--
c101172_g1	SC	1.00	2.62	239	--	--	--	--	--	--	--	--	--	--	--	--	--	--	--	--	--	--	--	--	--	--	--	--	--	--	--	--
c101173_g1	SC	2.00	2.35	280	443689725	ELT92057.1	197	9.47833e-17	hypothetical protein CAPTEDRAFT_83840, partial [Capitella teleta]	--	--	--	--	--	K05027	CLCA1	calcium-activated chloride channel regulator 1	http://www.genome.jp/dbget-bin/www_bget?ko:K05027	Q6PT52	158	4.83883e-12	Calcium-activated chloride channel regulator 1 OS=Macaca mulatta GN=CLCA1 PE=2 SV=1	--	--	--	--	--	--	--	--	--	--
c101174_g1	SC	1.00	4.23	222	--	--	--	--	--	--	--	--	--	--	--	--	--	--	--	--	--	--	--	--	--	--	--	--	--	--	--	--
c101175_g1	SC	1.00	2.32	244	--	--	--	--	--	--	--	--	--	--	--	--	--	--	--	--	--	--	--	--	--	--	--	--	--	--	--	--
c101176_g1	SC	1.00	1.53	264	--	--	--	--	--	--	--	--	--	--	--	--	--	--	--	--	--	--	--	--	--	--	--	--	--	--	--	--
c101178_g1	SC	1.00	6.65	209	--	--	--	--	--	--	--	--	--	--	--	--	--	--	--	--	--	--	--	--	--	--	--	--	--	--	--	--
c10117_g1	SC	5.00	1.41	473	115927353	XP_787434.2	216	3.45684e-18	PREDICTED: glycoprotein 3-alpha-L-fucosyltransferase A-like [Strongylocentrotus purpuratus]>gi|780075326|ref|XP_011672105.1| PREDICTED: glycoprotein 3-alpha-L-fucosyltransferase A-like [Strongylocentrotus purpuratus]	--	--	--	--	--	K00753	E2.4.1.214	glycoprotein 3-alpha-L-fucosyltransferase	http://www.genome.jp/dbget-bin/www_bget?ko:K00753	Q9VUL9	146	5.73317e-10	Glycoprotein 3-alpha-L-fucosyltransferase A OS=Drosophila melanogaster GN=FucTA PE=2 SV=2	PF00852	Glycosyltransferase family 10 (fucosyltransferase) C-term	GO:0006486	protein glycosylation	GO:0008417	fucosyltransferase activity	GO:0016020	membrane	KOG2619	Fucosyltransferase
c101180_g1	SC	2.00	1.77	301	--	--	--	--	--	--	--	--	--	--	--	--	--	--	--	--	--	--	--	--	--	--	--	--	--	--	--	--
c101182_g1	SC	2.00	2.81	269	--	--	--	--	--	--	--	--	--	--	--	--	--	--	--	--	--	--	--	--	--	--	--	--	--	--	--	--
c101183_g1	SC	2.00	2.25	283	--	--	--	--	--	--	--	--	--	--	--	--	--	--	--	--	--	--	--	--	--	--	--	--	--	--	--	--
c101185_g1	SC	5.00	2.12	389	--	--	--	--	--	--	--	--	--	--	--	--	--	--	--	--	--	--	--	--	--	--	--	--	--	--	--	--
c101186_g1	SC	3.00	23.36	205	--	--	--	--	--	--	--	--	--	--	--	--	--	--	--	--	--	--	--	--	--	--	--	--	--	--	--	--
c101187_g1	SC	2.00	10.32	216	--	--	--	--	--	--	--	--	--	--	--	--	--	--	--	--	--	--	--	--	--	--	--	--	--	--	--	--
c101189_g1	SC	2.00	3.80	253	--	--	--	--	--	--	--	--	--	--	--	--	--	--	--	--	--	--	--	--	--	--	--	--	--	--	--	--
c101190_g1	SC	1.00	3.63	227	--	--	--	--	--	--	--	--	--	--	--	--	--	--	--	--	--	--	--	--	--	--	--	--	--	--	--	--
c101191_g1	SC	1.00	1.23	277	--	--	--	--	--	--	--	--	--	--	--	--	--	--	--	--	--	--	--	--	--	--	--	--	--	--	--	--
c101192_g1	SC	2.00	3.80	253	--	--	--	--	--	--	--	--	--	--	--	--	--	--	--	--	--	--	--	--	--	--	--	--	--	--	--	--
c101193_g1	SC	2.00	10.32	216	--	--	--	--	--	--	--	--	--	--	--	--	--	--	--	--	--	--	--	--	--	--	--	--	--	--	--	--
c101194_g1	SC	1.00	3.63	227	--	--	--	--	--	--	--	--	--	--	--	--	--	--	--	--	--	--	--	--	--	--	--	--	--	--	--	--
c101195_g1	SC	2.00	3.96	251	--	--	--	--	--	--	--	--	--	--	--	--	--	--	--	--	--	--	PF02148	Zn-finger in ubiquitin-hydrolases and other protein	--	--	GO:0008270	zinc ion binding	--	--	--	--
c101197_g1	SC	3.00	10.27	229	--	--	--	--	--	--	--	--	--	--	--	--	--	--	--	--	--	--	--	--	--	--	--	--	--	--	--	--
c101198_g1	SC	2.00	18.41	201	--	--	--	--	--	--	--	--	--	--	--	--	--	--	--	--	--	--	--	--	--	--	--	--	--	--	--	--
c101199_g1	SC	3.00	1.29	387	--	--	--	--	--	--	--	--	--	--	--	--	--	--	--	--	--	--	--	--	--	--	--	--	--	--	--	--
c10119_g1	SC	1.00	2.07	249	--	--	--	--	--	--	--	--	--	--	--	--	--	--	--	--	--	--	--	--	--	--	--	--	--	--	--	--
c1011_g1	SC	11686.00	2739.10	523	706002451	AIW62428.1	226	2.09567e-21	ribosomal protein L39, partial [Scytodes thoracica]	159145741	EU116913.1	34	2.81942e-06	Barentsia elongata putative ribosomal protein L39 mRNA, complete cds	K02924	RP-L39e, RPL39	large subunit ribosomal protein L39e	http://www.genome.jp/dbget-bin/www_bget?ko:K02924	Q6BHV8	220	4.8625e-22	60S ribosomal protein L39 OS=Debaryomyces hansenii (strain ATCC 36239 / CBS 767 / JCM 1990 / NBRC 0083 / IGC 2968) GN=RPL39 PE=3 SV=1	PF00832	Ribosomal L39 protein	GO:0042254//GO:0006412	ribosome biogenesis//translation	GO:0003735	structural constituent of ribosome	GO:0005840//GO:0005622	ribosome//intracellular	KOG0002	60s ribosomal protein L39
c101200_g1	SC	1.00	2.98	234	--	--	--	--	--	--	--	--	--	--	--	--	--	--	--	--	--	--	--	--	--	--	--	--	--	--	--	--
c101201_g1	SC	3.00	4.43	266	--	--	--	--	--	--	--	--	--	--	--	--	--	--	--	--	--	--	--	--	--	--	--	--	--	--	--	--
c101202_g1	SC	2.00	4.64	244	--	--	--	--	--	--	--	--	--	--	--	--	--	--	--	--	--	--	--	--	--	--	--	--	--	--	--	--
c101203_g1	SC	4.00	9.96	241	--	--	--	--	--	--	--	--	--	--	--	--	--	--	--	--	--	--	--	--	--	--	--	--	--	--	--	--
c101205_g1	SC	1.00	2.32	244	--	--	--	--	--	--	--	--	--	--	--	--	--	--	--	--	--	--	--	--	--	--	--	--	--	--	--	--
c101207_g1	SC	9.00	3.30	415	--	--	--	--	--	--	--	--	--	--	--	--	--	--	--	--	--	--	--	--	--	--	--	--	--	--	--	--
c101208_g1	SC	6.00	7.27	278	--	--	--	--	--	--	--	--	--	--	--	--	--	--	--	--	--	--	--	--	--	--	--	--	--	--	--	--
c101209_g1	SC	1.00	5.16	216	--	--	--	--	--	--	--	--	--	--	--	--	--	--	--	--	--	--	--	--	--	--	--	--	--	--	--	--
c10120_g1	SC	22.00	2.31	894	--	--	--	--	--	--	--	--	--	--	--	--	--	--	--	--	--	--	--	--	--	--	--	--	--	--	--	--
c101213_g1	SC	2.00	4.23	248	--	--	--	--	--	--	--	--	--	--	--	--	--	--	--	--	--	--	--	--	--	--	--	--	--	--	--	--
c101215_g1	SC	4.00	2.69	327	--	--	--	--	--	--	--	--	--	--	--	--	--	--	--	--	--	--	--	--	--	--	--	--	--	--	--	--
c101216_g1	SC	2.00	5.65	236	--	--	--	--	--	--	--	--	--	--	--	--	--	--	--	--	--	--	--	--	--	--	--	--	--	--	--	--
c101217_g1	SC	1.00	6.91	208	780147643	XP_011681552.1	311	2.34018e-31	PREDICTED: LOW QUALITY PROTEIN: intraflagellar transport protein 172 homolog [Strongylocentrotus purpuratus]	--	--	--	--	--	--	--	--	--	Q6VH22	272	1.87325e-27	Intraflagellar transport protein 172 homolog OS=Mus musculus GN=Ift172 PE=1 SV=1	PF00637//PF13414	Region in Clathrin and VPS//TPR repeat	GO:0006886//GO:0016192	intracellular protein transport//vesicle-mediated transport	GO:0005515	protein binding	--	--	--	--
c101218_g1	SC	1.00	4.37	221	--	--	--	--	--	--	--	--	--	--	--	--	--	--	--	--	--	--	--	--	--	--	--	--	--	--	--	--
c101219_g1	SC	2.00	4.05	250	--	--	--	--	--	--	--	--	--	--	--	--	--	--	--	--	--	--	--	--	--	--	--	--	--	--	--	--
c101220_g1	SC	1.00	3.97	224	--	--	--	--	--	--	--	--	--	--	--	--	--	--	--	--	--	--	--	--	--	--	--	--	--	--	--	--
c101221_g1	SC	2.00	9.97	217	780153921	XP_011682099.1	182	4.78787e-14	PREDICTED: protein fantom isoform X4 [Strongylocentrotus purpuratus]	--	--	--	--	--	K16550	RPGRIP1L	protein fantom	http://www.genome.jp/dbget-bin/www_bget?ko:K16550	Q68CZ1	146	1.31187e-10	Protein fantom OS=Homo sapiens GN=RPGRIP1L PE=1 SV=2	PF01166//PF04508//PF00038//PF00170	TSC-22/dip/bun family//Viral A-type inclusion protein repeat//Intermediate filament protein//bZIP transcription factor	GO:0006355//GO:0016032	regulation of transcription, DNA-templated//viral process	GO:0005198//GO:0003700//GO:0043565	structural molecule activity//transcription factor activity, sequence-specific DNA binding//sequence-specific DNA binding	GO:0005882//GO:0005667	intermediate filament//transcription factor complex	--	--
c101222_g1	SC	1.00	1.18	280	--	--	--	--	--	--	--	--	--	--	--	--	--	--	--	--	--	--	--	--	--	--	--	--	--	--	--	--
c101223_g1	SC	1.00	2.90	235	--	--	--	--	--	--	--	--	--	--	--	--	--	--	--	--	--	--	PF06320	GCN5-like protein 1 (GCN5L1)	--	--	--	--	GO:0031083	BLOC-1 complex	--	--
c101225_g1	SC	2.00	2.62	273	--	--	--	--	--	--	--	--	--	--	--	--	--	--	--	--	--	--	--	--	--	--	--	--	--	--	--	--
c101226_g1	SC	2.00	9.64	218	--	--	--	--	--	--	--	--	--	--	--	--	--	--	--	--	--	--	--	--	--	--	--	--	--	--	--	--
c101227_g1	SC	3.00	1.67	349	339243341	XP_003377596.1	474	4.28945e-54	putative FERM central domain protein [Trichinella spiralis]>gi|316973591|gb|EFV57159.1| putative FERM central domain protein [Trichinella spiralis]	--	--	--	--	--	--	--	--	--	Q9JMC8	437	1.49452e-50	Band 4.1-like protein 4B OS=Mus musculus GN=Epb41l4b PE=2 SV=2	PF00887	Acyl CoA binding protein	--	--	GO:0008092//GO:0000062	cytoskeletal protein binding//fatty-acyl-CoA binding	GO:0005856//GO:0019898//GO:0005737	cytoskeleton//extrinsic component of membrane//cytoplasm	KOG3530	FERM domain protein EHM2
c101228_g1	SC	5.00	8.26	260	--	--	--	--	--	--	--	--	--	--	--	--	--	--	--	--	--	--	--	--	--	--	--	--	--	--	--	--
c10122_g1	SC	12.00	16.55	270	--	--	--	--	--	--	--	--	--	--	--	--	--	--	--	--	--	--	--	--	--	--	--	--	--	--	--	--
c101230_g1	SC	1.00	2.37	243	--	--	--	--	--	--	--	--	--	--	--	--	--	--	--	--	--	--	--	--	--	--	--	--	--	--	--	--
c101231_g1	SC	2.00	3.72	254	--	--	--	--	--	--	--	--	--	--	--	--	--	--	--	--	--	--	--	--	--	--	--	--	--	--	--	--
c101233_g1	SC	1.00	7.19	207	--	--	--	--	--	--	--	--	--	--	--	--	--	--	--	--	--	--	--	--	--	--	--	--	--	--	--	--
c101234_g1	SC	1.00	2.62	239	--	--	--	--	--	--	--	--	--	--	--	--	--	--	--	--	--	--	--	--	--	--	--	--	--	--	--	--
c101235_g1	SC	5.00	3.71	317	--	--	--	--	--	--	--	--	--	--	--	--	--	--	--	--	--	--	--	--	--	--	--	--	--	--	--	--
c101236_g1	SC	9.00	76.09	203	--	--	--	--	--	--	--	--	--	--	--	--	--	--	--	--	--	--	--	--	--	--	--	--	--	--	--	--
c101238_g1	SC	1.00	6.17	211	--	--	--	--	--	--	--	--	--	--	--	--	--	--	--	--	--	--	--	--	--	--	--	--	--	--	--	--
c101239_g1	SC	2.00	8.20	223	--	--	--	--	--	--	--	--	--	--	--	--	--	--	--	--	--	--	--	--	--	--	--	--	--	--	--	--
c101240_g1	SC	1.00	8.45	203	--	--	--	--	--	--	--	--	--	--	--	--	--	--	--	--	--	--	--	--	--	--	--	--	--	--	--	--
c101241_g1	SC	3.00	26.45	202	--	--	--	--	--	--	--	--	--	--	--	--	--	--	--	--	--	--	--	--	--	--	--	--	--	--	--	--
c101242_g1	SC	2.00	1.25	335	--	--	--	--	--	--	--	--	--	--	--	--	--	--	--	--	--	--	--	--	--	--	--	--	--	--	--	--
c101243_g1	SC	5.00	2.33	374	--	--	--	--	--	--	--	--	--	--	--	--	--	--	--	--	--	--	PF00093	von Willebrand factor type C domain	--	--	GO:0005515	protein binding	--	--	--	--
c101244_g1	SC	3.00	3.28	285	--	--	--	--	--	--	--	--	--	--	--	--	--	--	--	--	--	--	--	--	--	--	--	--	--	--	--	--
c101245_g1	SC	1.00	2.68	238	--	--	--	--	--	--	--	--	--	--	--	--	--	--	--	--	--	--	--	--	--	--	--	--	--	--	--	--
c101247_g1	SC	4.00	4.85	278	--	--	--	--	--	--	--	--	--	--	--	--	--	--	--	--	--	--	PF11568	Mediator complex subunit 29	--	--	--	--	GO:0016592	mediator complex	--	--
c101248_g1	SC	1.00	4.51	220	--	--	--	--	--	--	--	--	--	--	--	--	--	--	--	--	--	--	--	--	--	--	--	--	--	--	--	--
c101249_g1	SC	3.00	1.15	406	--	--	--	--	--	--	--	--	--	--	--	--	--	--	--	--	--	--	--	--	--	--	--	--	--	--	--	--
c10124_g1	SC	3.00	2.63	302	390348600	XP_003727036.1	284	2.50092e-28	PREDICTED: RNA-directed DNA polymerase from mobile element jockey-like [Strongylocentrotus purpuratus]	--	--	--	--	--	--	--	--	--	P21328	124	1.84028e-07	RNA-directed DNA polymerase from mobile element jockey OS=Drosophila melanogaster GN=pol PE=1 SV=1	--	--	--	--	--	--	--	--	--	--
c101250_g1	SC	2.00	5.96	234	780181909	XP_011662117.1	140	1.78228e-08	PREDICTED: cytochrome P450 2D6-like [Strongylocentrotus purpuratus]	--	--	--	--	--	--	--	--	--	P05176	110	4.95657e-06	Cytochrome P450 1A1 OS=Oryctolagus cuniculus GN=CYP1A1 PE=2 SV=1	PF00067	Cytochrome P450	GO:0055114	oxidation-reduction process	GO:0016705//GO:0005506//GO:0020037	oxidoreductase activity, acting on paired donors, with incorporation or reduction of molecular oxygen//iron ion binding//heme binding	--	--	KOG0156	Cytochrome P450 CYP2 subfamily
c101251_g1	SC	2.00	2.09	288	--	--	--	--	--	--	--	--	--	--	--	--	--	--	--	--	--	--	--	--	--	--	--	--	--	--	--	--
c101252_g1	SC	1.00	1.90	253	--	--	--	--	--	--	--	--	--	--	--	--	--	--	--	--	--	--	--	--	--	--	--	--	--	--	--	--
c101254_g1	SC	1.00	4.37	221	--	--	--	--	--	--	--	--	--	--	--	--	--	--	--	--	--	--	--	--	--	--	--	--	--	--	--	--
c101255_g1	SC	2.00	7.48	226	--	--	--	--	--	--	--	--	--	--	--	--	--	--	--	--	--	--	--	--	--	--	--	--	--	--	--	--
c101256_g1	SC	3.00	2.79	297	--	--	--	--	--	--	--	--	--	--	--	--	--	--	--	--	--	--	--	--	--	--	--	--	--	--	--	--
c101258_g1	SC	1.00	8.82	202	--	--	--	--	--	--	--	--	--	--	--	--	--	--	--	--	--	--	--	--	--	--	--	--	--	--	--	--
c101259_g1	SC	1.00	0.99	292	--	--	--	--	--	--	--	--	--	--	--	--	--	--	--	--	--	--	--	--	--	--	--	--	--	--	--	--
c10125_g1	SC	1.00	0.69	325	--	--	--	--	--	--	--	--	--	--	--	--	--	--	--	--	--	--	--	--	--	--	--	--	--	--	--	--
c10125_g2	SC	1.00	3.33	230	--	--	--	--	--	--	--	--	--	--	--	--	--	--	--	--	--	--	--	--	--	--	--	--	--	--	--	--
c101260_g1	SC	2.00	1.63	308	--	--	--	--	--	--	--	--	--	--	--	--	--	--	--	--	--	--	--	--	--	--	--	--	--	--	--	--
c101261_g1	SC	3.00	8.05	238	--	--	--	--	--	--	--	--	--	--	--	--	--	--	--	--	--	--	--	--	--	--	--	--	--	--	--	--
c101263_g1	SC	2.00	9.97	217	--	--	--	--	--	--	--	--	--	--	--	--	--	--	--	--	--	--	--	--	--	--	--	--	--	--	--	--
c101265_g1	SC	2.00	1.82	299	--	--	--	--	--	--	--	--	--	--	--	--	--	--	--	--	--	--	--	--	--	--	--	--	--	--	--	--
c101266_g1	SC	2.00	1.93	294	675380845	KFM73747.1	124	2.06015e-06	hypothetical protein X975_11667, partial [Stegodyphus mimosarum]	--	--	--	--	--	--	--	--	--	--	--	--	--	--	--	--	--	--	--	--	--	KOG4567	GTPase-activating protein
c101267_g1	SC	1.00	3.24	231	--	--	--	--	--	--	--	--	--	--	--	--	--	--	--	--	--	--	--	--	--	--	--	--	--	--	--	--
c10126_g1	SC	3.00	6.64	246	--	--	--	--	--	--	--	--	--	--	--	--	--	--	--	--	--	--	--	--	--	--	--	--	--	--	--	--
c101270_g1	SC	2.00	2.67	272	--	--	--	--	--	--	--	--	--	--	--	--	--	--	--	--	--	--	--	--	--	--	--	--	--	--	--	--
c101271_g1	SC	2.00	13.30	209	--	--	--	--	--	--	--	--	--	--	--	--	--	--	--	--	--	--	--	--	--	--	--	--	--	--	--	--
c101272_g1	SC	2.00	8.74	221	--	--	--	--	--	--	--	--	--	--	--	--	--	--	--	--	--	--	--	--	--	--	--	--	--	--	--	--
c101273_g1	SC	4.00	1.53	407	--	--	--	--	--	--	--	--	--	--	--	--	--	--	--	--	--	--	--	--	--	--	--	--	--	--	--	--
c101274_g1	SC	1.00	7.79	205	--	--	--	--	--	--	--	--	--	--	--	--	--	--	--	--	--	--	--	--	--	--	--	--	--	--	--	--
c101275_g1	SC	1.00	2.75	237	--	--	--	--	--	--	--	--	--	--	--	--	--	--	--	--	--	--	--	--	--	--	--	--	--	--	--	--
c101276_g1	SC	2.00	7.26	227	--	--	--	--	--	--	--	--	--	--	--	--	--	--	--	--	--	--	--	--	--	--	--	--	--	--	--	--
c101277_g1	SC	2.00	2.85	268	--	--	--	--	--	--	--	--	--	--	--	--	--	--	--	--	--	--	--	--	--	--	--	--	--	--	--	--
c101278_g1	SC	1.00	2.07	249	--	--	--	--	--	--	--	--	--	--	--	--	--	--	--	--	--	--	--	--	--	--	--	--	--	--	--	--
c101279_g1	SC	5.00	2.34	373	--	--	--	--	--	--	--	--	--	--	--	--	--	--	--	--	--	--	--	--	--	--	--	--	--	--	--	--
c10127_g1	SC	6.00	1.93	441	--	--	--	--	--	--	--	--	--	--	--	--	--	--	--	--	--	--	--	--	--	--	--	--	--	--	--	--
c101280_g1	SC	1.00	7.79	205	--	--	--	--	--	--	--	--	--	--	--	--	--	--	--	--	--	--	--	--	--	--	--	--	--	--	--	--
c101282_g1	SC	2.00	6.29	232	--	--	--	--	--	--	--	--	--	--	--	--	--	--	--	--	--	--	--	--	--	--	--	--	--	--	--	--
c101284_g1	SC	2.00	9.64	218	--	--	--	--	--	--	--	--	--	--	--	--	--	--	--	--	--	--	--	--	--	--	--	--	--	--	--	--
c101285_g1	SC	1.00	7.48	206	--	--	--	--	--	--	--	--	--	--	--	--	--	--	--	--	--	--	--	--	--	--	--	--	--	--	--	--
c101286_g1	SC	3.00	4.51	265	--	--	--	--	--	--	--	--	--	--	--	--	--	--	--	--	--	--	--	--	--	--	--	--	--	--	--	--
c101287_g1	SC	1.00	3.53	228	--	--	--	--	--	--	--	--	--	--	--	--	--	--	--	--	--	--	--	--	--	--	--	--	--	--	--	--
c101288_g1	SC	3.00	4.51	265	--	--	--	--	--	--	--	--	--	--	--	--	--	--	--	--	--	--	--	--	--	--	--	--	--	--	--	--
c101290_g1	SC	2.00	1.60	310	--	--	--	--	--	--	--	--	--	--	--	--	--	--	--	--	--	--	--	--	--	--	--	--	--	--	--	--
c101291_g1	SC	2.00	8.46	222	--	--	--	--	--	--	--	--	--	--	--	--	--	--	--	--	--	--	--	--	--	--	--	--	--	--	--	--
c101292_g1	SC	4.00	5.25	273	--	--	--	--	--	--	--	--	--	--	--	--	--	--	--	--	--	--	--	--	--	--	--	--	--	--	--	--
c101294_g1	SC	1.00	7.19	207	--	--	--	--	--	--	--	--	--	--	--	--	--	--	--	--	--	--	--	--	--	--	--	--	--	--	--	--
c101295_g1	SC	2.00	3.72	254	--	--	--	--	--	--	--	--	--	--	--	--	--	--	--	--	--	--	--	--	--	--	--	--	--	--	--	--
c101296_g1	SC	1.00	5.53	214	--	--	--	--	--	--	--	--	--	--	--	--	--	--	--	--	--	--	--	--	--	--	--	--	--	--	--	--
c101297_g1	SC	1.00	3.63	227	390353915	XP_003728220.1	260	2.21823e-24	PREDICTED: uncharacterized protein LOC100892659 [Strongylocentrotus purpuratus]	--	--	--	--	--	--	--	--	--	--	--	--	--	--	--	--	--	--	--	--	--	--	--
c101298_g1	SC	1.00	3.06	233	--	--	--	--	--	--	--	--	--	--	--	--	--	--	--	--	--	--	PF02315	Methanol dehydrogenase beta subunit	GO:0055114//GO:0015946	oxidation-reduction process//methanol oxidation	GO:0004022	alcohol dehydrogenase (NAD) activity	--	--	--	--
c101299_g1	SC	3.00	1.24	393	662210032	XP_008478639.1	430	5.56451e-51	PREDICTED: LIM domain kinase 1-like [Diaphorina citri]	--	--	--	--	--	K05743	LIMK1	LIM domain kinase 1	http://www.genome.jp/dbget-bin/www_bget?ko:K05743	P53668	423	8.15731e-48	LIM domain kinase 1 OS=Mus musculus GN=Limk1 PE=1 SV=1	PF00069//PF07714	Protein kinase domain//Protein tyrosine kinase	GO:0006468	protein phosphorylation	GO:0004672//GO:0005524	protein kinase activity//ATP binding	--	--	KOG0198	MEKK and related serine/threonine protein kinases
c10129_g1	SC	1.00	1.65	260	--	--	--	--	--	--	--	--	--	--	--	--	--	--	--	--	--	--	--	--	--	--	--	--	--	--	--	--
c1012_g1	SC	3.00	4.43	266	--	--	--	--	--	--	--	--	--	--	--	--	--	--	--	--	--	--	--	--	--	--	--	--	--	--	--	--
c101300_g1	SC	2.00	3.88	252	--	--	--	--	--	--	--	--	--	--	--	--	--	--	--	--	--	--	--	--	--	--	--	--	--	--	--	--
c101301_g1	SC	3.00	19.21	210	--	--	--	--	--	--	--	--	--	--	--	--	--	--	--	--	--	--	--	--	--	--	--	--	--	--	--	--
c101302_g1	SC	4.00	3.16	311	291243174	XP_002741479.1	323	5.72141e-34	PREDICTED: protein XRP2-like [Saccoglossus kowalevskii]	--	--	--	--	--	K18272	RP2	protein XRP2	http://www.genome.jp/dbget-bin/www_bget?ko:K18272	Q9EPK2	284	6.57662e-30	Protein XRP2 OS=Mus musculus GN=Rp2 PE=1 SV=3	--	--	--	--	--	--	--	--	--	--
c101304_g1	SC	2.00	7.95	224	--	--	--	--	--	--	--	--	--	--	--	--	--	--	--	--	--	--	--	--	--	--	--	--	--	--	--	--
c101305_g1	SC	3.00	2.57	304	--	--	--	--	--	--	--	--	--	--	--	--	--	--	--	--	--	--	--	--	--	--	--	--	--	--	--	--
c101306_g1	SC	1.00	2.90	235	642065944	CDQ89725.1	134	1.91579e-08	unnamed protein product [Oncorhynchus mykiss]	--	--	--	--	--	--	--	--	--	--	--	--	--	--	--	--	--	--	--	--	--	--	--
c101307_g1	SC	3.00	9.98	230	--	--	--	--	--	--	--	--	--	--	--	--	--	--	--	--	--	--	--	--	--	--	--	--	--	--	--	--
c101308_g1	SC	2.00	2.01	291	--	--	--	--	--	--	--	--	--	--	--	--	--	--	--	--	--	--	--	--	--	--	--	--	--	--	--	--
c101309_g1	SC	2.00	1.73	303	--	--	--	--	--	--	--	--	--	--	--	--	--	--	--	--	--	--	--	--	--	--	--	--	--	--	--	--
c101312_g1	SC	1.00	2.83	236	--	--	--	--	--	--	--	--	--	--	--	--	--	--	--	--	--	--	--	--	--	--	--	--	--	--	--	--
c101313_g1	SC	2.00	4.14	249	--	--	--	--	--	--	--	--	--	--	--	--	--	--	--	--	--	--	--	--	--	--	--	--	--	--	--	--
c101314_g1	SC	2.00	2.50	276	780103106	XP_792445.4	222	3.52781e-19	PREDICTED: anaphase-promoting complex subunit 5 isoform X1 [Strongylocentrotus purpuratus]>gi|780103112|ref|XP_011675516.1| PREDICTED: anaphase-promoting complex subunit 5 isoform X2 [Strongylocentrotus purpuratus]	--	--	--	--	--	K03352	APC5	anaphase-promoting complex subunit 5	http://www.genome.jp/dbget-bin/www_bget?ko:K03352	Q8BTZ4	134	7.04841e-09	Anaphase-promoting complex subunit 5 OS=Mus musculus GN=Anapc5 PE=2 SV=1	--	--	--	--	--	--	--	--	--	--
c101315_g1	SC	5.00	5.79	281	--	--	--	--	--	--	--	--	--	--	--	--	--	--	--	--	--	--	--	--	--	--	--	--	--	--	--	--
c101316_g1	SC	4.00	2.08	358	--	--	--	--	--	--	--	--	--	--	--	--	--	--	--	--	--	--	--	--	--	--	--	--	--	--	--	--
c101318_g1	SC	4.00	2.55	333	--	--	--	--	--	--	--	--	--	--	--	--	--	--	--	--	--	--	--	--	--	--	--	--	--	--	--	--
c101319_g1	SC	3.00	4.43	266	--	--	--	--	--	--	--	--	--	--	--	--	--	--	--	--	--	--	--	--	--	--	--	--	--	--	--	--
c10131_g1	SC	483.00	27.82	1444	--	--	--	--	--	--	--	--	--	--	--	--	--	--	--	--	--	--	--	--	--	--	--	--	--	--	--	--
c10131_g2	SC	118.00	34.14	466	--	--	--	--	--	--	--	--	--	--	--	--	--	--	--	--	--	--	--	--	--	--	--	--	--	--	--	--
c101321_g1	SC	1.00	7.79	205	--	--	--	--	--	--	--	--	--	--	--	--	--	--	--	--	--	--	--	--	--	--	--	--	--	--	--	--
c101324_g1	SC	1.00	3.06	233	780087066	XP_011673543.1	282	1.82421e-27	PREDICTED: uncharacterized protein LOC594672 [Strongylocentrotus purpuratus]	--	--	--	--	--	--	--	--	--	--	--	--	--	PF00334	Nucleoside diphosphate kinase	GO:0006183//GO:0006144//GO:0006165//GO:0006228//GO:0006241//GO:0006206	GTP biosynthetic process//purine nucleobase metabolic process//nucleoside diphosphate phosphorylation//UTP biosynthetic process//CTP biosynthetic process//pyrimidine nucleobase metabolic process	GO:0004550	nucleoside diphosphate kinase activity	--	--	--	--
c101325_g1	SC	1.00	3.63	227	--	--	--	--	--	--	--	--	--	--	--	--	--	--	--	--	--	--	PF15150//PF09119	Phorbol-12-myristate-13-acetate-induced//SicP binding	GO:0006915//GO:0006974//GO:0001836//GO:0006919	apoptotic process//cellular response to DNA damage stimulus//release of cytochrome c from mitochondria//activation of cysteine-type endopeptidase activity involved in apoptotic process	--	--	GO:0005615	extracellular space	--	--
c101326_g1	SC	1.00	4.37	221	--	--	--	--	--	--	--	--	--	--	--	--	--	--	--	--	--	--	--	--	--	--	--	--	--	--	--	--
c101328_g1	SC	2.00	11.47	213	--	--	--	--	--	--	--	--	--	--	--	--	--	--	--	--	--	--	--	--	--	--	--	--	--	--	--	--
c10132_g1	SC	104.00	18.85	611	--	--	--	--	--	--	--	--	--	--	--	--	--	--	--	--	--	--	--	--	--	--	--	--	--	--	--	--
c101331_g1	SC	1.00	4.82	218	--	--	--	--	--	--	--	--	--	--	--	--	--	--	--	--	--	--	--	--	--	--	--	--	--	--	--	--
c101333_g1	SC	1.00	4.51	220	--	--	--	--	--	--	--	--	--	--	--	--	--	--	--	--	--	--	--	--	--	--	--	--	--	--	--	--
c101335_g1	SC	1.00	6.91	208	--	--	--	--	--	--	--	--	--	--	--	--	--	--	--	--	--	--	--	--	--	--	--	--	--	--	--	--
c101336_g1	SC	3.00	1.86	336	--	--	--	--	--	--	--	--	--	--	--	--	--	--	--	--	--	--	--	--	--	--	--	--	--	--	--	--
c101338_g1	SC	2.00	1.36	326	--	--	--	--	--	--	--	--	--	--	--	--	--	--	--	--	--	--	--	--	--	--	--	--	--	--	--	--
c101339_g1	SC	1.00	3.85	225	--	--	--	--	--	--	--	--	--	--	--	--	--	--	--	--	--	--	--	--	--	--	--	--	--	--	--	--
c101340_g1	SC	3.00	5.05	259	--	--	--	--	--	--	--	--	--	--	--	--	--	--	--	--	--	--	--	--	--	--	--	--	--	--	--	--
c101341_g1	SC	1.00	1.65	260	--	--	--	--	--	--	--	--	--	--	--	--	--	--	--	--	--	--	--	--	--	--	--	--	--	--	--	--
c101342_g1	SC	2.00	2.46	277	--	--	--	--	--	--	--	--	--	--	--	--	--	--	--	--	--	--	--	--	--	--	--	--	--	--	--	--
c101343_g1	SC	1.00	4.99	217	--	--	--	--	--	--	--	--	--	--	--	--	--	--	--	--	--	--	--	--	--	--	--	--	--	--	--	--
c101344_g1	SC	2.00	3.72	254	--	--	--	--	--	--	--	--	--	--	--	--	--	--	--	--	--	--	--	--	--	--	--	--	--	--	--	--
c101345_g1	SC	2.00	9.32	219	--	--	--	--	--	--	--	--	--	--	--	--	--	--	--	--	--	--	--	--	--	--	--	--	--	--	--	--
c101346_g1	SC	2.00	1.77	301	--	--	--	--	--	--	--	--	--	--	--	--	--	--	--	--	--	--	PF15957	Commissureless	GO:0007411	axon guidance	--	--	--	--	--	--
c101347_g1	SC	1.00	4.51	220	--	--	--	--	--	--	--	--	--	--	--	--	--	--	--	--	--	--	--	--	--	--	--	--	--	--	--	--
c101348_g1	SC	1.00	1.90	253	--	--	--	--	--	--	--	--	--	--	--	--	--	--	--	--	--	--	--	--	--	--	--	--	--	--	--	--
c10134_g1	SC	110.00	7.10	1312	--	--	--	--	--	--	--	--	--	--	--	--	--	--	--	--	--	--	--	--	--	--	--	--	--	--	--	--
c101350_g1	SC	1.00	1.11	284	--	--	--	--	--	--	--	--	--	--	--	--	--	--	--	--	--	--	--	--	--	--	--	--	--	--	--	--
c101352_g1	SC	1.00	4.66	219	--	--	--	--	--	--	--	--	--	--	--	--	--	--	--	--	--	--	--	--	--	--	--	--	--	--	--	--
c101355_g1	SC	4.00	5.81	267	--	--	--	--	--	--	--	--	--	--	--	--	--	--	--	--	--	--	--	--	--	--	--	--	--	--	--	--
c101356_g1	SC	2.00	11.89	212	--	--	--	--	--	--	--	--	--	--	--	--	--	--	--	--	--	--	--	--	--	--	--	--	--	--	--	--
c101357_g1	SC	1.00	9.20	201	--	--	--	--	--	--	--	--	--	--	--	--	--	--	--	--	--	--	--	--	--	--	--	--	--	--	--	--
c101359_g1	SC	1.00	3.63	227	--	--	--	--	--	--	--	--	--	--	--	--	--	--	--	--	--	--	--	--	--	--	--	--	--	--	--	--
c10135_g1	SC	2.00	7.05	228	--	--	--	--	--	--	--	--	--	--	--	--	--	--	--	--	--	--	--	--	--	--	--	--	--	--	--	--
c10135_g2	SC	4.00	2.36	342	--	--	--	--	--	--	--	--	--	--	--	--	--	--	--	--	--	--	--	--	--	--	--	--	--	--	--	--
c101360_g1	SC	3.00	1.93	332	--	--	--	--	--	--	--	--	--	--	--	--	--	--	--	--	--	--	--	--	--	--	--	--	--	--	--	--
c101361_g1	SC	2.00	3.43	258	--	--	--	--	--	--	--	--	--	--	--	--	--	--	--	--	--	--	--	--	--	--	--	--	--	--	--	--
c101362_g1	SC	1.00	3.74	226	--	--	--	--	--	--	--	--	--	--	--	--	--	--	--	--	--	--	--	--	--	--	--	--	--	--	--	--
c101363_g1	SC	2.00	1.51	315	--	--	--	--	--	--	--	--	--	--	--	--	--	--	--	--	--	--	--	--	--	--	--	--	--	--	--	--
c101364_g1	SC	1.00	4.10	223	--	--	--	--	--	--	--	--	--	--	--	--	--	--	--	--	--	--	--	--	--	--	--	--	--	--	--	--
c101365_g1	SC	2.00	8.20	223	--	--	--	--	--	--	--	--	--	--	--	--	--	--	--	--	--	--	--	--	--	--	--	--	--	--	--	--
c101366_g1	SC	2.00	5.80	235	--	--	--	--	--	--	--	--	--	--	--	--	--	--	--	--	--	--	--	--	--	--	--	--	--	--	--	--
c101367_g1	SC	1.00	4.51	220	--	--	--	--	--	--	--	--	--	--	--	--	--	--	--	--	--	--	--	--	--	--	--	--	--	--	--	--
c101368_g1	SC	1.00	7.79	205	--	--	--	--	--	--	--	--	--	--	--	--	--	--	--	--	--	--	--	--	--	--	--	--	--	--	--	--
c101369_g1	SC	1.00	4.51	220	--	--	--	--	--	--	--	--	--	--	--	--	--	--	--	--	--	--	--	--	--	--	--	--	--	--	--	--
c101370_g1	SC	1.00	5.34	215	--	--	--	--	--	--	--	--	--	--	--	--	--	--	--	--	--	--	--	--	--	--	--	--	--	--	--	--
c101371_g1	SC	1.00	2.90	235	--	--	--	--	--	--	--	--	--	--	--	--	--	--	--	--	--	--	--	--	--	--	--	--	--	--	--	--
c101372_g1	SC	8.00	9.69	278	--	--	--	--	--	--	--	--	--	--	--	--	--	--	--	--	--	--	--	--	--	--	--	--	--	--	--	--
c101373_g1	SC	1.00	4.99	217	--	--	--	--	--	--	--	--	--	--	--	--	--	--	--	--	--	--	--	--	--	--	--	--	--	--	--	--
c101374_g1	SC	2.00	7.95	224	--	--	--	--	--	--	--	--	--	--	--	--	--	--	--	--	--	--	--	--	--	--	--	--	--	--	--	--
c101375_g1	SC	3.00	3.94	273	--	--	--	--	--	--	--	--	--	--	--	--	--	--	--	--	--	--	--	--	--	--	--	--	--	--	--	--
c101376_g1	SC	2.00	1.82	299	--	--	--	--	--	--	--	--	--	--	--	--	--	--	--	--	--	--	--	--	--	--	--	--	--	--	--	--
c101377_g1	SC	1.00	5.53	214	--	--	--	--	--	--	--	--	--	--	--	--	--	--	--	--	--	--	--	--	--	--	--	--	--	--	--	--
c101378_g1	SC	1.00	8.45	203	--	--	--	--	--	--	--	--	--	--	--	--	--	--	--	--	--	--	--	--	--	--	--	--	--	--	--	--
c101379_g1	SC	3.00	6.35	248	--	--	--	--	--	--	--	--	--	--	--	--	--	--	--	--	--	--	--	--	--	--	--	--	--	--	--	--
c10137_g1	SC	16.00	2.82	622	--	--	--	--	--	--	--	--	--	--	--	--	--	--	--	--	--	--	PF00008	EGF-like domain	--	--	GO:0005515	protein binding	--	--	KOG1219	Uncharacterized conserved protein, contains laminin, cadherin and EGF domains
c10137_g2	SC	87.00	5.02	1442	--	--	--	--	--	--	--	--	--	--	--	--	--	--	--	--	--	--	--	--	--	--	--	--	--	--	--	--
c101380_g1	SC	1.00	3.74	226	--	--	--	--	--	--	--	--	--	--	--	--	--	--	--	--	--	--	--	--	--	--	--	--	--	--	--	--
c101382_g1	SC	1.00	2.26	245	--	--	--	--	--	--	--	--	--	--	--	--	--	--	--	--	--	--	--	--	--	--	--	--	--	--	--	--
c101383_g1	SC	2.00	4.23	248	--	--	--	--	--	--	--	--	--	--	--	--	--	--	--	--	--	--	--	--	--	--	--	--	--	--	--	--
c101385_g1	SC	3.00	17.84	212	--	--	--	--	--	--	--	--	--	--	--	--	--	--	--	--	--	--	--	--	--	--	--	--	--	--	--	--
c101386_g1	SC	3.00	8.26	237	--	--	--	--	--	--	--	--	--	--	--	--	--	--	--	--	--	--	--	--	--	--	--	--	--	--	--	--
c101387_g1	SC	3.00	3.53	280	--	--	--	--	--	--	--	--	--	--	--	--	--	--	--	--	--	--	--	--	--	--	--	--	--	--	--	--
c101388_g1	SC	1.00	5.53	214	--	--	--	--	--	--	--	--	--	--	--	--	--	--	--	--	--	--	--	--	--	--	--	--	--	--	--	--
c10138_g1	SC	4.00	3.06	314	--	--	--	--	--	--	--	--	--	--	--	--	--	--	--	--	--	--	--	--	--	--	--	--	--	--	--	--
c101390_g1	SC	2.00	11.89	212	--	--	--	--	--	--	--	--	--	--	--	--	--	--	--	--	--	--	--	--	--	--	--	--	--	--	--	--
c101391_g1	SC	2.00	2.76	270	--	--	--	--	--	--	--	--	--	--	--	--	--	--	--	--	--	--	PF04923	Ninjurin	GO:0042246//GO:0007155	tissue regeneration//cell adhesion	--	--	GO:0016021	integral component of membrane	--	--
c101392_g1	SC	2.00	11.89	212	--	--	--	--	--	--	--	--	--	--	--	--	--	--	--	--	--	--	PF06524//PF04889//PF05454	NOA36 protein//Cwf15/Cwc15 cell cycle control protein//Dystroglycan (Dystrophin-associated glycoprotein 1)	GO:0000398//GO:0007016	mRNA splicing, via spliceosome//cytoskeletal anchoring at plasma membrane	GO:0008270	zinc ion binding	GO:0016010//GO:0005681//GO:0005634	dystrophin-associated glycoprotein complex//spliceosomal complex//nucleus	--	--
c101393_g1	SC	1.00	7.19	207	--	--	--	--	--	--	--	--	--	--	--	--	--	--	--	--	--	--	--	--	--	--	--	--	--	--	--	--
c101394_g1	SC	2.00	8.74	221	--	--	--	--	--	--	--	--	--	--	--	--	--	--	--	--	--	--	--	--	--	--	--	--	--	--	--	--
c101395_g1	SC	2.00	1.23	337	--	--	--	--	--	--	--	--	--	--	--	--	--	--	--	--	--	--	--	--	--	--	--	--	--	--	--	--
c101397_g1	SC	1.00	1.90	253	--	--	--	--	--	--	--	--	--	--	--	--	--	--	--	--	--	--	--	--	--	--	--	--	--	--	--	--
c101398_g1	SC	1.00	6.91	208	--	--	--	--	--	--	--	--	--	--	--	--	--	--	--	--	--	--	--	--	--	--	--	--	--	--	--	--
c10139_g1	SC	8.00	2.21	477	780178459	XP_011661681.1	520	6.64872e-60	PREDICTED: phosphoacetylglucosamine mutase [Strongylocentrotus purpuratus]	--	--	--	--	--	K01836	E5.4.2.3	phosphoacetylglucosamine mutase	http://www.genome.jp/dbget-bin/www_bget?ko:K01836	O95394	382	4.6379e-42	Phosphoacetylglucosamine mutase OS=Homo sapiens GN=PGM3 PE=1 SV=1	PF03114//PF02879	BAR domain//Phosphoglucomutase/phosphomannomutase, alpha/beta/alpha domain II	GO:0005975	carbohydrate metabolic process	GO:0005515	protein binding	GO:0005737	cytoplasm	KOG2537	Phosphoglucomutase/phosphomannomutase
c1013_g1	SC	43.00	2.29	1546	390336399	XP_791788.3	1040	2.8584e-131	PREDICTED: solute carrier family 22 member 3 [Strongylocentrotus purpuratus]	--	--	--	--	--	--	--	--	--	Q9VCA2	671	9.33208e-79	Organic cation transporter protein OS=Drosophila melanogaster GN=Orct PE=1 SV=1	PF07690//PF00083//PF03092	Major Facilitator Superfamily//Sugar (and other) transporter//BT1 family	GO:0055085//GO:0006810	transmembrane transport//transport	GO:0022857	transmembrane transporter activity	GO:0016021	integral component of membrane	KOG0255	Synaptic vesicle transporter SVOP and related transporters (major facilitator superfamily)
c101400_g1	SC	1.00	5.73	213	--	--	--	--	--	--	--	--	--	--	--	--	--	--	--	--	--	--	--	--	--	--	--	--	--	--	--	--
c101401_g1	SC	2.00	8.20	223	--	--	--	--	--	--	--	--	--	--	--	--	--	--	--	--	--	--	--	--	--	--	--	--	--	--	--	--
c101402_g1	SC	3.00	7.47	241	--	--	--	--	--	--	--	--	--	--	--	--	--	--	--	--	--	--	--	--	--	--	--	--	--	--	--	--
c101403_g1	SC	2.00	16.91	203	--	--	--	--	--	--	--	--	--	--	--	--	--	--	--	--	--	--	--	--	--	--	--	--	--	--	--	--
c101405_g1	SC	1.00	6.91	208	--	--	--	--	--	--	--	--	--	--	--	--	--	--	--	--	--	--	--	--	--	--	--	--	--	--	--	--
c101407_g1	SC	3.00	3.58	279	--	--	--	--	--	--	--	--	--	--	--	--	--	--	--	--	--	--	--	--	--	--	--	--	--	--	--	--
c101409_g1	SC	1.00	4.51	220	--	--	--	--	--	--	--	--	--	--	--	--	--	--	--	--	--	--	--	--	--	--	--	--	--	--	--	--
c10140_g1	SC	25.00	4.10	652	72087493	XP_790473.1	337	2.01754e-35	PREDICTED: ras-related protein RIC1 [Strongylocentrotus purpuratus]	--	--	--	--	--	K07874	RAB1A	Ras-related protein Rab-1A	http://www.genome.jp/dbget-bin/www_bget?ko:K07874	Q05737	265	1.25767e-26	GTP-binding protein YPTM2 OS=Zea mays GN=YPTM2 PE=2 SV=1	PF04670//PF08477//PF03193//PF00735//PF03205//PF07728//PF00005//PF01926//PF00071//PF00025	Gtr1/RagA G protein conserved region//Ras of Complex, Roc, domain of DAPkinase//Protein of unknown function, DUF258//Septin//Molybdopterin guanine dinucleotide synthesis protein B//AAA domain (dynein-related subfamily)//ABC transporter//50S ribosome-binding GTPase//Ras family//ADP-ribosylation factor family	GO:0007264//GO:0006777	small GTPase mediated signal transduction//Mo-molybdopterin cofactor biosynthetic process	GO:0005524//GO:0003924//GO:0005525//GO:0016887	ATP binding//GTPase activity//GTP binding//ATPase activity	--	--	KOG0084	GTPase Rab1/YPT1, small G protein superfamily, and related GTP-binding proteins
c101411_g1	SC	1.00	7.48	206	--	--	--	--	--	--	--	--	--	--	--	--	--	--	--	--	--	--	--	--	--	--	--	--	--	--	--	--
c101412_g1	SC	2.00	7.48	226	--	--	--	--	--	--	--	--	--	--	--	--	--	--	--	--	--	--	--	--	--	--	--	--	--	--	--	--
c101413_g1	SC	1.00	6.65	209	--	--	--	--	--	--	--	--	--	--	--	--	--	--	--	--	--	--	--	--	--	--	--	--	--	--	--	--
c101414_g1	SC	3.00	6.21	249	--	--	--	--	--	--	--	--	--	--	--	--	--	--	--	--	--	--	--	--	--	--	--	--	--	--	--	--
c101416_g1	SC	3.00	5.05	259	--	--	--	--	--	--	--	--	--	--	--	--	--	--	--	--	--	--	--	--	--	--	--	--	--	--	--	--
c101417_g1	SC	1.00	3.06	233	--	--	--	--	--	--	--	--	--	--	--	--	--	--	--	--	--	--	--	--	--	--	--	--	--	--	--	--
c101418_g1	SC	2.00	11.07	214	--	--	--	--	--	--	--	--	--	--	--	--	--	--	--	--	--	--	--	--	--	--	--	--	--	--	--	--
c101419_g1	SC	1.00	5.53	214	--	--	--	--	--	--	--	--	--	--	--	--	--	--	--	--	--	--	--	--	--	--	--	--	--	--	--	--
c10141_g1	SC	18.00	2.17	806	--	--	--	--	--	--	--	--	--	--	--	--	--	--	--	--	--	--	--	--	--	--	--	--	--	--	--	--
c10141_g2	SC	4.00	2.40	340	--	--	--	--	--	--	--	--	--	--	--	--	--	--	--	--	--	--	--	--	--	--	--	--	--	--	--	--
c101420_g1	SC	1.00	7.79	205	--	--	--	--	--	--	--	--	--	--	--	--	--	--	--	--	--	--	--	--	--	--	--	--	--	--	--	--
c101421_g1	SC	1.00	4.10	223	--	--	--	--	--	--	--	--	--	--	--	--	--	--	--	--	--	--	--	--	--	--	--	--	--	--	--	--
c101422_g1	SC	2.00	10.32	216	--	--	--	--	--	--	--	--	--	--	--	--	--	--	--	--	--	--	--	--	--	--	--	--	--	--	--	--
c101424_g1	SC	1.00	1.50	265	--	--	--	--	--	--	--	--	--	--	--	--	--	--	--	--	--	--	PF07975	TFIIH C1-like domain	GO:0006281	DNA repair	GO:0008270	zinc ion binding	--	--	--	--
c101425_g1	SC	1.00	7.48	206	--	--	--	--	--	--	--	--	--	--	--	--	--	--	--	--	--	--	PF01830	Peptidase C7 family	GO:0006508	proteolysis	GO:0004197	cysteine-type endopeptidase activity	--	--	--	--
c101427_g1	SC	1.00	1.68	259	--	--	--	--	--	--	--	--	--	--	--	--	--	--	--	--	--	--	--	--	--	--	--	--	--	--	--	--
c10142_g1	SC	5.00	2.68	354	--	--	--	--	--	--	--	--	--	--	--	--	--	--	--	--	--	--	--	--	--	--	--	--	--	--	--	--
c101430_g1	SC	1.00	8.45	203	--	--	--	--	--	--	--	--	--	--	--	--	--	--	--	--	--	--	--	--	--	--	--	--	--	--	--	--
c101431_g1	SC	1.00	2.26	245	780160259	XP_011682965.1	308	6.96888e-31	PREDICTED: condensin complex subunit 3-like [Strongylocentrotus purpuratus]	--	--	--	--	--	K06678	YCG1, CAPG	condensin complex subunit 3	http://www.genome.jp/dbget-bin/www_bget?ko:K06678	Q9BPX3	258	1.81098e-25	Condensin complex subunit 3 OS=Homo sapiens GN=NCAPG PE=1 SV=1	PF02985	HEAT repeat	--	--	GO:0005515	protein binding	--	--	KOG2025	Chromosome condensation complex Condensin, subunit G
c101432_g1	SC	1.00	7.48	206	--	--	--	--	--	--	--	--	--	--	--	--	--	--	--	--	--	--	--	--	--	--	--	--	--	--	--	--
c101433_g1	SC	2.00	2.76	270	--	--	--	--	--	--	--	--	--	--	--	--	--	--	--	--	--	--	--	--	--	--	--	--	--	--	--	--
c101434_g1	SC	1.00	2.55	240	--	--	--	--	--	--	--	--	--	--	--	--	--	--	--	--	--	--	--	--	--	--	--	--	--	--	--	--
c101435_g1	SC	1.00	1.79	256	--	--	--	--	--	--	--	--	--	--	--	--	--	--	--	--	--	--	--	--	--	--	--	--	--	--	--	--
c101436_g1	SC	1.00	2.62	239	--	--	--	--	--	--	--	--	--	--	--	--	--	--	--	--	--	--	--	--	--	--	--	--	--	--	--	--
c101437_g1	SC	3.00	7.85	239	--	--	--	--	--	--	--	--	--	--	--	--	--	--	--	--	--	--	--	--	--	--	--	--	--	--	--	--
c101438_g1	SC	2.00	4.33	247	--	--	--	--	--	--	--	--	--	--	--	--	--	--	--	--	--	--	--	--	--	--	--	--	--	--	--	--
c101439_g1	SC	2.00	15.57	205	780100491	XP_011675193.1	221	1.67789e-19	PREDICTED: protein FAM179B isoform X1 [Strongylocentrotus purpuratus]	--	--	--	--	--	--	--	--	--	Q6A070	180	3.10136e-15	Protein FAM179B OS=Mus musculus GN=Fam179b PE=3 SV=3	--	--	--	--	--	--	--	--	KOG2933	Uncharacterized conserved protein
c101441_g1	SC	2.00	5.37	238	--	--	--	--	--	--	--	--	--	--	--	--	--	--	--	--	--	--	--	--	--	--	--	--	--	--	--	--
c101442_g1	SC	3.00	4.95	260	390346177	XP_793631.3	189	8.20147e-15	PREDICTED: trithorax group protein osa isoform X1 [Strongylocentrotus purpuratus]	--	--	--	--	--	--	--	--	--	Q978J0	118	1.16099e-07	Putative ankyrin repeat protein TV1425 OS=Thermoplasma volcanium (strain ATCC 51530 / DSM 4299 / JCM 9571 / NBRC 15438 / GSS1) GN=TV1425 PE=1 SV=1	PF13606	Ankyrin repeat	--	--	GO:0005515	protein binding	--	--	KOG0504	FOG: Ankyrin repeat
c101443_g1	SC	1.00	1.27	275	--	--	--	--	--	--	--	--	--	--	--	--	--	--	--	--	--	--	--	--	--	--	--	--	--	--	--	--
c101444_g1	SC	3.00	10.27	229	89365556	CAI64375.1	126	7.34664e-07	serpin 6 precursor [Branchiostoma lanceolatum]	--	--	--	--	--	--	--	--	--	--	--	--	--	--	--	--	--	--	--	--	--	--	--
c101445_g1	SC	2.00	2.39	279	--	--	--	--	--	--	--	--	--	--	--	--	--	--	--	--	--	--	--	--	--	--	--	--	--	--	--	--
c101446_g1	SC	2.00	14.38	207	--	--	--	--	--	--	--	--	--	--	--	--	--	--	--	--	--	--	--	--	--	--	--	--	--	--	--	--
c101449_g1	SC	1.00	3.53	228	--	--	--	--	--	--	--	--	--	--	--	--	--	--	--	--	--	--	--	--	--	--	--	--	--	--	--	--
c10144_g1	SC	4.00	1.89	372	780074305	XP_011671961.1	284	8.59499e-27	PREDICTED: zonadhesin [Strongylocentrotus purpuratus]	--	--	--	--	--	--	--	--	--	O88799	172	2.72588e-13	Zonadhesin OS=Mus musculus GN=Zan PE=2 SV=1	PF02276	Photosynthetic reaction centre cytochrome C subunit	GO:0019684//GO:0006118	photosynthesis, light reaction//obsolete electron transport	GO:0020037//GO:0009055//GO:0005506	heme binding//electron carrier activity//iron ion binding	GO:0030077	plasma membrane light-harvesting complex	KOG1216	von Willebrand factor and related coagulation proteins
c10144_g2	SC	3.00	2.04	326	641770516	XP_008169455.1	225	3.71816e-19	PREDICTED: IgGFc-binding protein-like [Chrysemys picta bellii]	--	--	--	--	--	K18273	TECTA	alpha-tectorin	http://www.genome.jp/dbget-bin/www_bget?ko:K18273	Q9Y6R7	163	2.49142e-12	IgGFc-binding protein OS=Homo sapiens GN=FCGBP PE=1 SV=3	--	--	--	--	--	--	--	--	--	--
c101451_g1	SC	3.00	10.27	229	--	--	--	--	--	--	--	--	--	--	--	--	--	--	--	--	--	--	--	--	--	--	--	--	--	--	--	--
c101452_g1	SC	2.00	7.71	225	--	--	--	--	--	--	--	--	--	--	--	--	--	--	--	--	--	--	--	--	--	--	--	--	--	--	--	--
c101453_g1	SC	1.00	8.82	202	--	--	--	--	--	--	--	--	--	--	--	--	--	--	--	--	--	--	--	--	--	--	--	--	--	--	--	--
c101454_g1	SC	4.00	4.31	286	701432048	XP_010004282.1	306	1.09118e-33	PREDICTED: R3H domain-containing protein 1-like, partial [Chaetura pelagica]	--	--	--	--	--	--	--	--	--	Q15032	304	2.28036e-31	R3H domain-containing protein 1 OS=Homo sapiens GN=R3HDM1 PE=1 SV=3	PF01157//PF01424	Ribosomal protein L21e//R3H domain	GO:0042254//GO:0006412	ribosome biogenesis//translation	GO:0003676//GO:0003735	nucleic acid binding//structural constituent of ribosome	GO:0005840//GO:0005622	ribosome//intracellular	KOG2953	mRNA-binding protein Encore
c101455_g1	SC	2.00	4.86	242	--	--	--	--	--	--	--	--	--	--	--	--	--	--	--	--	--	--	--	--	--	--	--	--	--	--	--	--
c101456_g1	SC	2.00	2.32	281	--	--	--	--	--	--	--	--	--	--	--	--	--	--	--	--	--	--	--	--	--	--	--	--	--	--	--	--
c101457_g1	SC	2.00	3.37	259	762126794	XP_011446460.1	224	8.03515e-20	PREDICTED: uncharacterized protein LOC105341578 [Crassostrea gigas]	--	--	--	--	--	--	--	--	--	--	--	--	--	--	--	--	--	--	--	--	--	--	--
c101458_g1	SC	3.00	3.94	273	780179090	XP_011661763.1	129	5.29714e-07	PREDICTED: uncharacterized protein LOC105437166 [Strongylocentrotus purpuratus]	--	--	--	--	--	--	--	--	--	--	--	--	--	--	--	--	--	--	--	--	--	--	--
c10145_g1	SC	3.00	10.89	227	--	--	--	--	--	--	--	--	--	--	--	--	--	--	--	--	--	--	--	--	--	--	--	--	--	--	--	--
c101460_g1	SC	5.00	2.46	366	--	--	--	--	--	--	--	--	--	--	--	--	--	--	--	--	--	--	--	--	--	--	--	--	--	--	--	--
c101461_g1	SC	2.00	8.20	223	--	--	--	--	--	--	--	--	--	--	--	--	--	--	--	--	--	--	--	--	--	--	--	--	--	--	--	--
c101463_g1	SC	1.00	5.95	212	--	--	--	--	--	--	--	--	--	--	--	--	--	--	--	--	--	--	--	--	--	--	--	--	--	--	--	--
c101464_g1	SC	3.00	5.70	253	--	--	--	--	--	--	--	--	--	--	--	--	--	--	--	--	--	--	--	--	--	--	--	--	--	--	--	--
c101465_g1	SC	1.00	6.65	209	--	--	--	--	--	--	--	--	--	--	--	--	--	--	--	--	--	--	--	--	--	--	--	--	--	--	--	--
c101466_g1	SC	1.00	5.53	214	--	--	--	--	--	--	--	--	--	--	--	--	--	--	--	--	--	--	--	--	--	--	--	--	--	--	--	--
c101467_g1	SC	1.00	2.83	236	--	--	--	--	--	--	--	--	--	--	--	--	--	--	--	--	--	--	--	--	--	--	--	--	--	--	--	--
c101468_g1	SC	3.00	16.03	215	--	--	--	--	--	--	--	--	--	--	--	--	--	--	--	--	--	--	--	--	--	--	--	--	--	--	--	--
c101470_g1	SC	4.00	7.14	256	--	--	--	--	--	--	--	--	--	--	--	--	--	--	--	--	--	--	--	--	--	--	--	--	--	--	--	--
c101472_g1	SC	2.00	5.80	235	--	--	--	--	--	--	--	--	--	--	--	--	--	--	--	--	--	--	--	--	--	--	--	--	--	--	--	--
c101473_g1	SC	1.00	4.10	223	--	--	--	--	--	--	--	--	--	--	--	--	--	--	--	--	--	--	--	--	--	--	--	--	--	--	--	--
c101477_g1	SC	2.00	13.83	208	--	--	--	--	--	--	--	--	--	--	--	--	--	--	--	--	--	--	--	--	--	--	--	--	--	--	--	--
c101478_g1	SC	5.00	4.90	293	--	--	--	--	--	--	--	--	--	--	--	--	--	--	--	--	--	--	--	--	--	--	--	--	--	--	--	--
c101479_g1	SC	4.00	5.52	270	--	--	--	--	--	--	--	--	--	--	--	--	--	--	--	--	--	--	--	--	--	--	--	--	--	--	--	--
c10147_g1	SC	16.00	3.80	519	--	--	--	--	--	--	--	--	--	--	--	--	--	--	--	--	--	--	--	--	--	--	--	--	--	--	--	--
c101482_g1	SC	1.00	0.73	318	--	--	--	--	--	--	--	--	--	--	--	--	--	--	--	--	--	--	PF01660	Viral methyltransferase	GO:0009451//GO:0006396//GO:0080009	RNA modification//RNA processing//mRNA methylation	GO:0003723//GO:0008174	RNA binding//mRNA methyltransferase activity	--	--	--	--
c101483_g1	SC	2.00	9.64	218	--	--	--	--	--	--	--	--	--	--	--	--	--	--	--	--	--	--	--	--	--	--	--	--	--	--	--	--
c101484_g1	SC	2.00	2.76	270	260804593	XP_002597172.1	190	8.48281e-15	hypothetical protein BRAFLDRAFT_66300 [Branchiostoma floridae]>gi|229282435|gb|EEN53184.1| hypothetical protein BRAFLDRAFT_66300 [Branchiostoma floridae]	--	--	--	--	--	--	--	--	--	--	--	--	--	--	--	--	--	--	--	--	--	--	--
c101485_g1	SC	3.00	1.94	331	--	--	--	--	--	--	--	--	--	--	--	--	--	--	--	--	--	--	--	--	--	--	--	--	--	--	--	--
c101486_g1	SC	1.00	8.11	204	--	--	--	--	--	--	--	--	--	--	--	--	--	--	--	--	--	--	--	--	--	--	--	--	--	--	--	--
c101487_g1	SC	3.00	9.71	231	--	--	--	--	--	--	--	--	--	--	--	--	--	--	--	--	--	--	--	--	--	--	--	--	--	--	--	--
c101488_g1	SC	2.00	13.83	208	--	--	--	--	--	--	--	--	--	--	--	--	--	--	--	--	--	--	--	--	--	--	--	--	--	--	--	--
c101489_g1	SC	5.00	5.03	291	--	--	--	--	--	--	--	--	--	--	--	--	--	--	--	--	--	--	--	--	--	--	--	--	--	--	--	--
c10148_g1	SC	59.00	5.97	918	115696779	XP_799118.2	623	4.59484e-78	PREDICTED: trafficking protein particle complex subunit 2-like protein [Strongylocentrotus purpuratus]	--	--	--	--	--	--	--	--	--	B5XGE7	566	7.57503e-71	Trafficking protein particle complex subunit 2-like protein OS=Salmo salar GN=trappc2l PE=2 SV=1	PF04628//PF04099	Sedlin, N-terminal conserved region//Sybindin-like family	GO:0006888	ER to Golgi vesicle-mediated transport	--	--	GO:0005622//GO:0005801	intracellular//cis-Golgi network	KOG3444	Uncharacterized conserved protein
c101491_g1	SC	1.00	2.68	238	--	--	--	--	--	--	--	--	--	--	--	--	--	--	--	--	--	--	--	--	--	--	--	--	--	--	--	--
c101494_g1	SC	1.00	8.45	203	--	--	--	--	--	--	--	--	--	--	--	--	--	--	--	--	--	--	--	--	--	--	--	--	--	--	--	--
c101495_g1	SC	2.00	1.77	301	--	--	--	--	--	--	--	--	--	--	--	--	--	--	--	--	--	--	--	--	--	--	--	--	--	--	--	--
c101496_g1	SC	1.00	4.23	222	--	--	--	--	--	--	--	--	--	--	--	--	--	--	--	--	--	--	--	--	--	--	--	--	--	--	--	--
c101497_g1	SC	1.00	6.91	208	--	--	--	--	--	--	--	--	--	--	--	--	--	--	--	--	--	--	--	--	--	--	--	--	--	--	--	--
c101498_g1	SC	1.00	5.34	215	--	--	--	--	--	--	--	--	--	--	--	--	--	--	--	--	--	--	--	--	--	--	--	--	--	--	--	--
c10149_g1	SC	86.00	3.01	2234	762170695	XP_011423778.1	962	8.27509e-113	PREDICTED: coiled-coil and C2 domain-containing protein 1-like [Crassostrea gigas]	--	--	--	--	--	K18260	CC2D1	coiled-coil and C2 domain-containing protein 1	http://www.genome.jp/dbget-bin/www_bget?ko:K18260	Q29M42	749	2.94381e-85	Coiled-coil and C2 domain-containing protein 1-like OS=Drosophila pseudoobscura pseudoobscura GN=GA18377 PE=3 SV=2	PF16785//PF00168//PF00917	Small metal-binding protein//C2 domain//MATH domain	--	--	GO:0005515//GO:0046872	protein binding//metal ion binding	--	--	KOG3837	Uncharacterized conserved protein, contains DM14 and C2 domains
c101501_g1	SC	1.00	5.53	214	--	--	--	--	--	--	--	--	--	--	--	--	--	--	--	--	--	--	--	--	--	--	--	--	--	--	--	--
c101502_g1	SC	1.00	5.34	215	--	--	--	--	--	--	--	--	--	--	--	--	--	--	--	--	--	--	--	--	--	--	--	--	--	--	--	--
c101503_g1	SC	2.00	2.09	288	--	--	--	--	--	--	--	--	--	--	--	--	--	--	--	--	--	--	--	--	--	--	--	--	--	--	--	--
c101506_g1	SC	2.00	7.71	225	--	--	--	--	--	--	--	--	--	--	--	--	--	--	--	--	--	--	--	--	--	--	--	--	--	--	--	--
c101508_g1	SC	6.00	8.42	269	--	--	--	--	--	--	--	--	--	--	--	--	--	--	--	--	--	--	--	--	--	--	--	--	--	--	--	--
c101509_g1	SC	1.00	8.45	203	--	--	--	--	--	--	--	--	--	--	--	--	--	--	--	--	--	--	--	--	--	--	--	--	--	--	--	--
c10150_g1	SC	16.00	2.70	639	--	--	--	--	--	--	--	--	--	--	--	--	--	--	--	--	--	--	--	--	--	--	--	--	--	--	--	--
c101514_g1	SC	4.00	13.31	230	--	--	--	--	--	--	--	--	--	--	--	--	--	--	--	--	--	--	PF08043	Xin repeat	GO:0030036	actin cytoskeleton organization	GO:0003779	actin binding	GO:0030054	cell junction	--	--
c101515_g1	SC	2.00	3.96	251	--	--	--	--	--	--	--	--	--	--	--	--	--	--	--	--	--	--	--	--	--	--	--	--	--	--	--	--
c101517_g1	SC	3.00	15.48	216	--	--	--	--	--	--	--	--	--	--	--	--	--	--	--	--	--	--	--	--	--	--	--	--	--	--	--	--
c101518_g1	SC	1.00	4.51	220	--	--	--	--	--	--	--	--	--	--	--	--	--	--	--	--	--	--	--	--	--	--	--	--	--	--	--	--
c101519_g1	SC	1.00	7.48	206	--	--	--	--	--	--	--	--	--	--	--	--	--	--	--	--	--	--	--	--	--	--	--	--	--	--	--	--
c10151_g1	SC	4.00	3.42	304	780077337	XP_011672353.1	163	1.48505e-11	PREDICTED: uncharacterized protein LOC105442179 [Strongylocentrotus purpuratus]	--	--	--	--	--	--	--	--	--	--	--	--	--	--	--	--	--	--	--	--	--	--	--
c101520_g1	SC	3.00	7.29	242	--	--	--	--	--	--	--	--	--	--	--	--	--	--	--	--	--	--	--	--	--	--	--	--	--	--	--	--
c101523_g1	SC	1.00	3.85	225	--	--	--	--	--	--	--	--	--	--	--	--	--	--	--	--	--	--	--	--	--	--	--	--	--	--	--	--
c101524_g1	SC	3.00	8.05	238	260830216	XP_002610057.1	197	7.16311e-16	hypothetical protein BRAFLDRAFT_125687 [Branchiostoma floridae]>gi|229295420|gb|EEN66067.1| hypothetical protein BRAFLDRAFT_125687 [Branchiostoma floridae]	--	--	--	--	--	--	--	--	--	--	--	--	--	--	--	--	--	--	--	--	--	--	--
c101525_g1	SC	1.00	3.33	230	--	--	--	--	--	--	--	--	--	--	--	--	--	--	--	--	--	--	--	--	--	--	--	--	--	--	--	--
c101527_g1	SC	1.00	8.45	203	260815657	XP_002602589.1	244	2.00298e-22	patched protein-like protein [Branchiostoma floridae]>gi|229287900|gb|EEN58601.1| patched protein-like protein, partial [Branchiostoma floridae]	--	--	--	--	--	K06225	PTCH1	patched 1	http://www.genome.jp/dbget-bin/www_bget?ko:K06225	Q90693	239	4.07421e-23	Protein patched homolog 1 OS=Gallus gallus GN=PTCH1 PE=1 SV=1	PF02460	Patched family	GO:0007165	signal transduction	GO:0008158	hedgehog receptor activity	GO:0016021//GO:0016020	integral component of membrane//membrane	KOG1935	Membrane protein Patched/PTCH
c101529_g1	SC	1.00	8.45	203	--	--	--	--	--	--	--	--	--	--	--	--	--	--	--	--	--	--	--	--	--	--	--	--	--	--	--	--
c10152_g1	SC	80.00	9.55	812	--	--	--	--	--	--	--	--	--	--	--	--	--	--	--	--	--	--	--	--	--	--	--	--	--	--	--	--
c101530_g1	SC	2.00	3.30	260	780188737	XP_011663081.1	188	2.65192e-16	PREDICTED: uncharacterized protein LOC105437777 [Strongylocentrotus purpuratus]	--	--	--	--	--	--	--	--	--	--	--	--	--	PF11051//PF00530//PF04108	Mannosyltransferase putative//Scavenger receptor cysteine-rich domain//Autophagy protein Apg17	GO:0006914//GO:0007165//GO:0006486	autophagy//signal transduction//protein glycosylation	GO:0016757//GO:0005044	transferase activity, transferring glycosyl groups//scavenger receptor activity	GO:0016020	membrane	--	--
c101531_g1	SC	2.00	8.74	221	828222648	XP_012562376.1	194	3.16311e-17	PREDICTED: general transcription factor II-I repeat domain-containing protein 2-like [Hydra vulgaris]	--	--	--	--	--	--	--	--	--	--	--	--	--	--	--	--	--	--	--	--	--	--	--
c101533_g1	SC	1.00	5.53	214	--	--	--	--	--	--	--	--	--	--	--	--	--	--	--	--	--	--	--	--	--	--	--	--	--	--	--	--
c101534_g1	SC	1.00	9.20	201	--	--	--	--	--	--	--	--	--	--	--	--	--	--	--	--	--	--	--	--	--	--	--	--	--	--	--	--
c101537_g1	SC	1.00	6.91	208	--	--	--	--	--	--	--	--	--	--	--	--	--	--	--	--	--	--	--	--	--	--	--	--	--	--	--	--
c101538_g1	SC	2.00	7.48	226	443710416	ELU04669.1	132	1.03155e-08	hypothetical protein CAPTEDRAFT_75643, partial [Capitella teleta]	--	--	--	--	--	--	--	--	--	--	--	--	--	--	--	--	--	--	--	--	--	--	--
c101539_g1	SC	2.00	7.05	228	--	--	--	--	--	--	--	--	--	--	--	--	--	--	--	--	--	--	--	--	--	--	--	--	--	--	--	--
c101540_g1	SC	1.00	8.45	203	--	--	--	--	--	--	--	--	--	--	--	--	--	--	--	--	--	--	--	--	--	--	--	--	--	--	--	--
c101542_g1	SC	2.00	18.41	201	--	--	--	--	--	--	--	--	--	--	--	--	--	--	--	--	--	--	--	--	--	--	--	--	--	--	--	--
c101543_g1	SC	1.00	6.17	211	--	--	--	--	--	--	--	--	--	--	--	--	--	--	--	--	--	--	--	--	--	--	--	--	--	--	--	--
c101544_g1	SC	2.00	8.74	221	--	--	--	--	--	--	--	--	--	--	--	--	--	--	--	--	--	--	--	--	--	--	--	--	--	--	--	--
c101545_g1	SC	3.00	13.53	220	--	--	--	--	--	--	--	--	--	--	--	--	--	--	--	--	--	--	--	--	--	--	--	--	--	--	--	--
c101546_g1	SC	1.00	4.51	220	--	--	--	--	--	--	--	--	--	--	--	--	--	--	--	--	--	--	--	--	--	--	--	--	--	--	--	--
c101547_g1	SC	1.00	1.90	253	808885508	KKF32236.1	141	6.57297e-09	Retrovirus-related Pol polyprotein LINE-1 [Larimichthys crocea]	--	--	--	--	--	--	--	--	--	P14381	114	2.17497e-06	Transposon TX1 uncharacterized 149 kDa protein OS=Xenopus laevis PE=3 SV=1	--	--	--	--	--	--	--	--	--	--
c101548_g1	SC	1.00	5.53	214	--	--	--	--	--	--	--	--	--	--	--	--	--	--	--	--	--	--	--	--	--	--	--	--	--	--	--	--
c10155_g1	SC	3.00	2.27	315	675892134	XP_009031569.1	127	5.63502e-07	hypothetical protein HELRODRAFT_166387 [Helobdella robusta]>gi|555687450|gb|ESN90682.1| hypothetical protein HELRODRAFT_166387 [Helobdella robusta]	--	--	--	--	--	--	--	--	--	--	--	--	--	--	--	--	--	--	--	--	--	--	--
c10156_g1	SC	461.00	6.72	5049	390355599	XP_003728584.1	249	6.20177e-20	PREDICTED: CCAAT/enhancer-binding protein gamma-like [Strongylocentrotus purpuratus]	--	--	--	--	--	K10049	CEBPG	CCAAT/enhancer binding protein (C/EBP), gamma	http://www.genome.jp/dbget-bin/www_bget?ko:K10049	P53567	179	6.59486e-13	CCAAT/enhancer-binding protein gamma OS=Homo sapiens GN=CEBPG PE=1 SV=1	PF02863//PF00579//PF01763//PF07716//PF00170	Arginine repressor, C-terminal domain//tRNA synthetases class I (W and Y)//Herpesvirus UL6 like//Basic region leucine zipper//bZIP transcription factor	GO:0051259//GO:0006418//GO:0006355//GO:0006323	protein oligomerization//tRNA aminoacylation for protein translation//regulation of transcription, DNA-templated//DNA packaging	GO:0005524//GO:0034618//GO:0000166//GO:0043565//GO:0003700//GO:0004812	ATP binding//arginine binding//nucleotide binding//sequence-specific DNA binding//transcription factor activity, sequence-specific DNA binding//aminoacyl-tRNA ligase activity	GO:0005667	transcription factor complex	KOG3119	Basic region leucine zipper transcription factor
c10157_g1	SC	2.00	3.50	257	--	--	--	--	--	--	--	--	--	--	--	--	--	--	--	--	--	--	--	--	--	--	--	--	--	--	--	--
c10159_g1	SC	6.00	2.40	399	--	--	--	--	--	--	--	--	--	--	--	--	--	--	--	--	--	--	--	--	--	--	--	--	--	--	--	--
c1015_g1	SC	38.00	6.94	608	--	--	--	--	--	--	--	--	--	--	--	--	--	--	--	--	--	--	--	--	--	--	--	--	--	--	--	--
c10160_g1	SC	143.00	14.24	929	--	--	--	--	--	--	--	--	--	--	--	--	--	--	--	--	--	--	--	--	--	--	--	--	--	--	--	--
c10162_g1	SC	21.00	3.73	619	--	--	--	--	--	--	--	--	--	--	--	--	--	--	--	--	--	--	--	--	--	--	--	--	--	--	--	--
c10162_g2	SC	127.00	8.07	1330	--	--	--	--	--	--	--	--	--	--	--	--	--	--	--	--	--	--	--	--	--	--	--	--	--	--	--	--
c10163_g1	SC	8.00	3.18	400	--	--	--	--	--	--	--	--	--	--	--	--	--	--	--	--	--	--	--	--	--	--	--	--	--	--	--	--
c10164_g1	SC	6.00	2.01	433	--	--	--	--	--	--	--	--	--	--	--	--	--	--	--	--	--	--	--	--	--	--	--	--	--	--	--	--
c10165_g1	SC	15.00	5.52	414	--	--	--	--	--	--	--	--	--	--	--	--	--	--	--	--	--	--	--	--	--	--	--	--	--	--	--	--
c10166_g1	SC	14.00	11.97	304	--	--	--	--	--	--	--	--	--	--	--	--	--	--	--	--	--	--	--	--	--	--	--	--	--	--	--	--
c10167_g1	SC	4.00	2.42	339	--	--	--	--	--	--	--	--	--	--	--	--	--	--	--	--	--	--	--	--	--	--	--	--	--	--	--	--
c10168_g1	SC	6.00	2.37	401	--	--	--	--	--	--	--	--	--	--	--	--	--	--	--	--	--	--	--	--	--	--	--	--	--	--	--	--
c1016_g1	SC	12.00	3.06	499	--	--	--	--	--	--	--	--	--	--	--	--	--	--	--	--	--	--	PF00282	Pyridoxal-dependent decarboxylase conserved domain	GO:0019752	carboxylic acid metabolic process	GO:0016831//GO:0030170	carboxy-lyase activity//pyridoxal phosphate binding	--	--	--	--
c10171_g1	SC	12.00	2.74	531	--	--	--	--	--	--	--	--	--	--	--	--	--	--	--	--	--	--	--	--	--	--	--	--	--	--	--	--
c10172_g1	SC	1.00	2.49	241	--	--	--	--	--	--	--	--	--	--	--	--	--	--	--	--	--	--	--	--	--	--	--	--	--	--	--	--
c10173_g1	SC	5.00	12.46	241	--	--	--	--	--	--	--	--	--	--	--	--	--	--	--	--	--	--	--	--	--	--	--	--	--	--	--	--
c10174_g1	SC	10.00	1.52	687	--	--	--	--	--	--	--	--	--	--	--	--	--	--	--	--	--	--	--	--	--	--	--	--	--	--	--	--
c10176_g1	SC	3.00	3.10	289	--	--	--	--	--	--	--	--	--	--	--	--	--	--	--	--	--	--	--	--	--	--	--	--	--	--	--	--
c10177_g1	SC	38.00	2.67	1224	--	--	--	--	--	--	--	--	--	--	--	--	--	--	--	--	--	--	--	--	--	--	--	--	--	--	--	--
c10179_g1	SC	7.00	3.78	359	--	--	--	--	--	--	--	--	--	--	--	--	--	--	--	--	--	--	--	--	--	--	--	--	--	--	--	--
c1017_g1	SC	1.00	2.32	244	260805452	XP_002597601.1	272	4.7617e-27	hypothetical protein BRAFLDRAFT_225820 [Branchiostoma floridae]>gi|229282866|gb|EEN53613.1| hypothetical protein BRAFLDRAFT_225820, partial [Branchiostoma floridae]	--	--	--	--	--	K03320	amt, AMT, MEP	ammonium transporter, Amt family	http://www.genome.jp/dbget-bin/www_bget?ko:K03320	P54145	206	7.17822e-19	Putative ammonium transporter 1 OS=Caenorhabditis elegans GN=amt-1 PE=3 SV=1	PF00909	Ammonium Transporter Family	GO:0015696	ammonium transport	GO:0008519	ammonium transmembrane transporter activity	GO:0016020	membrane	KOG0682	Ammonia permease
c1017_g2	SC	6.00	2.51	391	762119317	XP_011442564.1	298	1.2478e-29	PREDICTED: putative ammonium transporter 1 [Crassostrea gigas]	--	--	--	--	--	K03320	amt, AMT, MEP	ammonium transporter, Amt family	http://www.genome.jp/dbget-bin/www_bget?ko:K03320	Q9SQH9	234	4.15932e-22	Ammonium transporter 1 member 3 OS=Arabidopsis thaliana GN=AMT1-3 PE=2 SV=2	PF00909	Ammonium Transporter Family	GO:0015696	ammonium transport	GO:0008519	ammonium transmembrane transporter activity	GO:0016020	membrane	KOG0682	Ammonia permease
c10180_g1	SC	23.00	1.54	1274	390341494	XP_796801.2	172	3.1506e-10	PREDICTED: centromere protein F [Strongylocentrotus purpuratus]	--	--	--	--	--	K11499	CENPF	centromere protein F	http://www.genome.jp/dbget-bin/www_bget?ko:K11499	--	--	--	--	PF01544	CorA-like Mg2+ transporter protein	GO:0030001//GO:0055085	metal ion transport//transmembrane transport	GO:0046873	metal ion transmembrane transporter activity	GO:0016020	membrane	--	--
c10181_g1	SC	5.00	1.31	491	--	--	--	--	--	--	--	--	--	--	--	--	--	--	--	--	--	--	--	--	--	--	--	--	--	--	--	--
c10182_g1	SC	1.00	1.02	290	--	--	--	--	--	--	--	--	--	--	--	--	--	--	--	--	--	--	--	--	--	--	--	--	--	--	--	--
c10183_g1	SC	5.00	2.72	352	--	--	--	--	--	--	--	--	--	--	--	--	--	--	--	--	--	--	--	--	--	--	--	--	--	--	--	--
c10184_g1	SC	12.00	1.78	697	--	--	--	--	--	--	--	--	--	--	--	--	--	--	--	--	--	--	--	--	--	--	--	--	--	--	--	--
c10186_g1	SC	5.00	1.87	411	260822048	XP_002606415.1	340	5.71671e-34	hypothetical protein BRAFLDRAFT_67666 [Branchiostoma floridae]>gi|229291756|gb|EEN62425.1| hypothetical protein BRAFLDRAFT_67666 [Branchiostoma floridae]	--	--	--	--	--	K17592	SACS	sacsin	http://www.genome.jp/dbget-bin/www_bget?ko:K17592	Q9NZJ4	264	3.0814e-25	Sacsin OS=Homo sapiens GN=SACS PE=1 SV=2	--	--	--	--	--	--	--	--	--	--
c10186_g2	SC	38.00	2.34	1365	780115672	XP_011677160.1	509	4.50992e-58	PREDICTED: sacsin-like [Strongylocentrotus purpuratus]	--	--	--	--	--	K17592	SACS	sacsin	http://www.genome.jp/dbget-bin/www_bget?ko:K17592	Q9NZJ4	405	1.90899e-42	Sacsin OS=Homo sapiens GN=SACS PE=1 SV=2	--	--	--	--	--	--	--	--	--	--
c10188_g1	SC	41.00	4.51	862	--	--	--	--	--	--	--	--	--	--	--	--	--	--	--	--	--	--	--	--	--	--	--	--	--	--	--	--
c10190_g1	SC	41.00	2.88	1225	780173226	XP_011660875.1	937	4.88166e-110	PREDICTED: WD repeat-containing protein 81 [Strongylocentrotus purpuratus]	--	--	--	--	--	K17601	WDR81	WD repeat-containing protein 81	http://www.genome.jp/dbget-bin/www_bget?ko:K17601	Q562E7	729	1.55249e-83	WD repeat-containing protein 81 OS=Homo sapiens GN=WDR81 PE=1 SV=2	--	--	--	--	--	--	--	--	KOG1786	Lysosomal trafficking regulator LYST and related BEACH and WD40 repeat proteins
c10191_g1	SC	5.00	3.95	311	291240166	XP_002739991.1	318	9.6565e-33	PREDICTED: DNA primase large subunit-like [Saccoglossus kowalevskii]	--	--	--	--	--	K02685	PRI2	DNA primase large subunit	http://www.genome.jp/dbget-bin/www_bget?ko:K02685	P33610	247	2.84074e-24	DNA primase large subunit OS=Mus musculus GN=Prim2 PE=1 SV=1	--	--	--	--	--	--	--	--	KOG2267	Eukaryotic-type DNA primase, large subunit
c10192_g2	SC	2.00	5.24	239	--	--	--	--	--	--	--	--	--	--	--	--	--	--	--	--	--	--	--	--	--	--	--	--	--	--	--	--
c10193_g1	SC	296.00	24.61	1069	589944419	XP_006984901.1	216	3.50641e-16	PREDICTED: cysteine-rich motor neuron 1 protein isoform X2 [Peromyscus maniculatus bairdii]	--	--	--	--	--	--	--	--	--	Q8AWW5	206	2.84486e-16	Cysteine-rich motor neuron 1 protein OS=Gallus gallus GN=CRIM1 PE=2 SV=1	PF00093	von Willebrand factor type C domain	--	--	GO:0005515	protein binding	--	--	KOG1216	von Willebrand factor and related coagulation proteins
c10194_g1	SC	3.00	1.96	330	--	--	--	--	--	--	--	--	--	--	--	--	--	--	--	--	--	--	--	--	--	--	--	--	--	--	--	--
c10195_g1	SC	38.00	3.32	1029	--	--	--	--	--	--	--	--	--	--	--	--	--	--	--	--	--	--	PF15319	RAD9, RAD1, HUS1-interacting nuclear orphan protein	GO:0071479//GO:0000077	cellular response to ionizing radiation//DNA damage checkpoint	--	--	GO:0005634	nucleus	--	--
c10196_g1	SC	11.00	1.95	619	--	--	--	--	--	--	--	--	--	--	--	--	--	--	--	--	--	--	--	--	--	--	--	--	--	--	--	--
c10197_g1	SC	24.00	3.40	720	--	--	--	--	--	--	--	--	--	--	--	--	--	--	--	--	--	--	--	--	--	--	--	--	--	--	--	--
c10198_g1	SC	52.00	6.32	802	--	--	--	--	--	--	--	--	--	--	--	--	--	--	--	--	--	--	--	--	--	--	--	--	--	--	--	--
c10199_g1	SC	3.00	2.83	296	--	--	--	--	--	--	--	--	--	--	--	--	--	--	--	--	--	--	--	--	--	--	--	--	--	--	--	--
c1019_g1	SC	107.00	4.33	1961	72108812	XP_792481.1	1604	0	PREDICTED: guanine nucleotide-binding protein subunit beta-5 [Strongylocentrotus purpuratus]	780004505	XM_787388.3	351	0	PREDICTED: Strongylocentrotus purpuratus guanine nucleotide-binding protein subunit beta-5 (LOC587675), mRNA	K04539	GNB5	guanine nucleotide-binding protein subunit beta-5	http://www.genome.jp/dbget-bin/www_bget?ko:K04539	O14775	1299	1.81626e-172	Guanine nucleotide-binding protein subunit beta-5 OS=Homo sapiens GN=GNB5 PE=2 SV=2	PF00813//PF00400	FliP family//WD domain, G-beta repeat	GO:0009306	protein secretion	GO:0005515	protein binding	GO:0016020	membrane	KOG0286	G-protein beta subunit
c101_g1	SC	5.00	3.46	324	--	--	--	--	--	--	--	--	--	--	--	--	--	--	--	--	--	--	--	--	--	--	--	--	--	--	--	--
c10200_g1	SC	31.00	2.49	1100	115757204	XP_800346.2	346	1.00871e-32	PREDICTED: uncharacterized protein LOC585566 [Strongylocentrotus purpuratus]	--	--	--	--	--	--	--	--	--	--	--	--	--	--	--	--	--	--	--	--	--	--	--
c10201_g1	SC	3.00	3.10	289	--	--	--	--	--	--	--	--	--	--	--	--	--	--	--	--	--	--	PF07886	BA14K-like protein	GO:0009405	pathogenesis	--	--	--	--	--	--
c10202_g1	SC	31.00	3.41	862	780136996	XP_011680127.1	1058	2.26741e-135	PREDICTED: polyribonucleotide nucleotidyltransferase 1, mitochondrial [Strongylocentrotus purpuratus]	--	--	--	--	--	K00962	pnp, PNPT1	polyribonucleotide nucleotidyltransferase	http://www.genome.jp/dbget-bin/www_bget?ko:K00962	Q8K1R3	940	3.18948e-119	Polyribonucleotide nucleotidyltransferase 1, mitochondrial OS=Mus musculus GN=Pnpt1 PE=1 SV=1	--	--	--	--	--	--	--	--	--	--
c10203_g1	SC	26.00	2.71	897	--	--	--	--	--	--	--	--	--	--	--	--	--	--	--	--	--	--	PF07127//PF01479	Late nodulin protein//S4 domain	GO:0009878	nodule morphogenesis	GO:0046872//GO:0003723	metal ion binding//RNA binding	--	--	--	--
c10204_g1	SC	1.00	4.23	222	--	--	--	--	--	--	--	--	--	--	--	--	--	--	--	--	--	--	--	--	--	--	--	--	--	--	--	--
c10205_g1	SC	12.00	2.61	546	--	--	--	--	--	--	--	--	--	--	--	--	--	--	--	--	--	--	--	--	--	--	--	--	--	--	--	--
c10206_g1	SC	23.00	3.52	683	--	--	--	--	--	--	--	--	--	--	--	--	--	--	--	--	--	--	--	--	--	--	--	--	--	--	--	--
c10207_g1	SC	25.00	4.09	653	--	--	--	--	--	--	--	--	--	--	--	--	--	--	--	--	--	--	--	--	--	--	--	--	--	--	--	--
c10208_g1	SC	4.00	9.27	244	--	--	--	--	--	--	--	--	--	--	--	--	--	--	--	--	--	--	--	--	--	--	--	--	--	--	--	--
c10209_g1	SC	4.00	3.09	313	--	--	--	--	--	--	--	--	--	--	--	--	--	--	--	--	--	--	PF07690	Major Facilitator Superfamily	GO:0055085	transmembrane transport	--	--	GO:0016021	integral component of membrane	--	--
c1020_g1	SC	249.00	16.44	1288	--	--	--	--	--	--	--	--	--	--	--	--	--	--	--	--	--	--	--	--	--	--	--	--	--	--	--	--
c10210_g1	SC	3.00	1.61	354	--	--	--	--	--	--	--	--	--	--	--	--	--	--	--	--	--	--	--	--	--	--	--	--	--	--	--	--
c10211_g1	SC	13.00	3.12	516	--	--	--	--	--	--	--	--	--	--	--	--	--	--	--	--	--	--	--	--	--	--	--	--	--	--	--	--
c10213_g1	SC	17.00	2.51	700	632989339	XP_007883599.1	707	1.62557e-89	PREDICTED: diacylglycerol kinase zeta-like, partial [Callorhinchus milii]	--	--	--	--	--	K00901	dgkA, DGK	diacylglycerol kinase (ATP)	http://www.genome.jp/dbget-bin/www_bget?ko:K00901	Q13574	693	2.01299e-82	Diacylglycerol kinase zeta OS=Homo sapiens GN=DGKZ PE=1 SV=3	PF00130	Phorbol esters/diacylglycerol binding domain (C1 domain)	GO:0035556	intracellular signal transduction	--	--	--	--	KOG0782	Predicted diacylglycerol kinase
c10214_g1	SC	25.00	2.57	907	780033493	XP_011667038.1	630	5.71015e-73	PREDICTED: nucleoporin GLE1 [Strongylocentrotus purpuratus]	--	--	--	--	--	K18723	GLE1	nucleoporin GLE1	http://www.genome.jp/dbget-bin/www_bget?ko:K18723	Q6DRB1	436	3.6075e-47	Nucleoporin GLE1 OS=Danio rerio GN=gle1 PE=2 SV=2	PF03938//PF07817//PF08656	Outer membrane protein (OmpH-like)//GLE1-like protein//DASH complex subunit Dad3	GO:0008608//GO:0016973	attachment of spindle microtubules to kinetochore//poly(A)+ mRNA export from nucleus	GO:0051082	unfolded protein binding	GO:0005643//GO:0072686//GO:0042729	nuclear pore//mitotic spindle//DASH complex	KOG2412	Nuclear-export-signal (NES)-containing protein/polyadenylated-RNA export factor
c10215_g1	SC	10.00	3.40	430	--	--	--	--	--	--	--	--	--	--	--	--	--	--	--	--	--	--	--	--	--	--	--	--	--	--	--	--
c10216_g1	SC	39.00	3.19	1084	--	--	--	--	--	--	--	--	--	--	--	--	--	--	--	--	--	--	--	--	--	--	--	--	--	--	--	--
c10218_g1	SC	25.00	6.13	564	--	--	--	--	--	--	--	--	--	--	--	--	--	--	--	--	--	--	--	--	--	--	--	--	--	--	--	--
c1021_g1	SC	111.00	10.56	962	--	--	--	--	--	--	--	--	--	--	--	--	--	--	--	--	--	--	--	--	--	--	--	--	--	--	--	--
c10220_g1	SC	9.00	2.10	524	--	--	--	--	--	--	--	--	--	--	--	--	--	--	--	--	--	--	--	--	--	--	--	--	--	--	--	--
c10222_g1	SC	3.00	2.14	321	--	--	--	--	--	--	--	--	--	--	--	--	--	--	--	--	--	--	--	--	--	--	--	--	--	--	--	--
c10223_g1	SC	19.00	2.97	673	--	--	--	--	--	--	--	--	--	--	--	--	--	--	--	--	--	--	--	--	--	--	--	--	--	--	--	--
c10223_g2	SC	7.00	1.66	520	--	--	--	--	--	--	--	--	--	--	--	--	--	--	--	--	--	--	--	--	--	--	--	--	--	--	--	--
c10224_g1	SC	2.00	12.34	211	--	--	--	--	--	--	--	--	--	--	--	--	--	--	--	--	--	--	--	--	--	--	--	--	--	--	--	--
c10227_g1	SC	16.00	1.52	965	--	--	--	--	--	--	--	--	--	--	--	--	--	--	--	--	--	--	--	--	--	--	--	--	--	--	--	--
c10228_g1	SC	10.00	1.81	612	--	--	--	--	--	--	--	--	--	--	--	--	--	--	--	--	--	--	--	--	--	--	--	--	--	--	--	--
c10229_g1	SC	5.00	17.12	229	--	--	--	--	--	--	--	--	--	--	--	--	--	--	--	--	--	--	--	--	--	--	--	--	--	--	--	--
c10230_g1	SC	1.00	4.99	217	--	--	--	--	--	--	--	--	--	--	--	--	--	--	--	--	--	--	--	--	--	--	--	--	--	--	--	--
c10231_g1	SC	23.00	2.77	806	390357289	XP_003728974.1	332	1.23037e-31	PREDICTED: two-pore calcium channel 1 isoform X1 [Strongylocentrotus purpuratus]	--	--	--	--	--	K16896	TPCN1	two pore calcium channel protein 1	http://www.genome.jp/dbget-bin/www_bget?ko:K16896	Q9WTN5	203	1.94591e-16	Two pore calcium channel protein 1 OS=Rattus norvegicus GN=Tpcn1 PE=1 SV=2	--	--	--	--	--	--	--	--	--	--
c10233_g1	SC	8.00	2.68	433	--	--	--	--	--	--	--	--	--	--	--	--	--	--	--	--	--	--	--	--	--	--	--	--	--	--	--	--
c10234_g1	SC	71.00	2.86	1966	762143513	XP_011455009.1	131	5.46198e-18	PREDICTED: uncharacterized protein LOC105347562 [Crassostrea gigas]	--	--	--	--	--	--	--	--	--	--	--	--	--	--	--	--	--	--	--	--	--	--	--
c10236_g1	SC	12.00	2.11	634	390336943	XP_001180028.2	458	2.42226e-50	PREDICTED: palmitoyltransferase AKR1 isoform X2 [Strongylocentrotus purpuratus]	--	--	--	--	--	K10335	ASB13	ankyrin repeat and SOCS box protein 13	http://www.genome.jp/dbget-bin/www_bget?ko:K10335	Q8WXK3	184	3.89574e-15	Ankyrin repeat and SOCS box protein 13 OS=Homo sapiens GN=ASB13 PE=1 SV=2	PF13606//PF00023	Ankyrin repeat//Ankyrin repeat	--	--	GO:0005515	protein binding	--	--	KOG0509	Ankyrin repeat and DHHC-type Zn-finger domain containing proteins
c10237_g1	SC	4.00	3.13	312	780143327	XP_011680971.1	147	5.92948e-09	PREDICTED: uncharacterized protein LOC100889439, partial [Strongylocentrotus purpuratus]	--	--	--	--	--	--	--	--	--	--	--	--	--	--	--	--	--	--	--	--	--	--	--
c10237_g2	SC	6.00	1.99	435	780143327	XP_011680971.1	500	1.19262e-55	PREDICTED: uncharacterized protein LOC100889439, partial [Strongylocentrotus purpuratus]	--	--	--	--	--	--	--	--	--	--	--	--	--	--	--	--	--	--	--	--	--	--	--
c10239_g1	SC	8.00	2.22	476	--	--	--	--	--	--	--	--	--	--	--	--	--	--	--	--	--	--	--	--	--	--	--	--	--	--	--	--
c10240_g1	SC	2.00	8.20	223	--	--	--	--	--	--	--	--	--	--	--	--	--	--	--	--	--	--	--	--	--	--	--	--	--	--	--	--
c10241_g1	SC	34.00	5.34	671	--	--	--	--	--	--	--	--	--	--	--	--	--	--	--	--	--	--	--	--	--	--	--	--	--	--	--	--
c10242_g1	SC	9.00	3.03	432	390362764	XP_003730221.1	281	6.44932e-27	PREDICTED: cyclin-dependent kinase 13, partial [Strongylocentrotus purpuratus]	--	--	--	--	--	--	--	--	--	--	--	--	--	PF00069	Protein kinase domain	GO:0006468	protein phosphorylation	GO:0005524//GO:0004672	ATP binding//protein kinase activity	--	--	--	--
c10243_g1	SC	53.00	7.48	721	--	--	--	--	--	--	--	--	--	--	--	--	--	--	--	--	--	--	--	--	--	--	--	--	--	--	--	--
c10244_g1	SC	10.00	2.59	495	--	--	--	--	--	--	--	--	--	--	--	--	--	--	--	--	--	--	--	--	--	--	--	--	--	--	--	--
c10245_g1	SC	108.00	4.27	2000	--	--	--	--	--	--	--	--	--	--	--	--	--	--	--	--	--	--	--	--	--	--	--	--	--	--	--	--
c10246_g1	SC	43.00	3.77	1025	--	--	--	--	--	--	--	--	--	--	--	--	--	--	--	--	--	--	--	--	--	--	--	--	--	--	--	--
c10247_g1	SC	4.00	4.37	285	--	--	--	--	--	--	--	--	--	--	--	--	--	--	--	--	--	--	--	--	--	--	--	--	--	--	--	--
c10248_g1	SC	43.00	2.90	1267	--	--	--	--	--	--	--	--	--	--	--	--	--	--	--	--	--	--	--	--	--	--	--	--	--	--	--	--
c10248_g2	SC	2.00	2.67	272	780154838	XP_011682216.1	289	5.48855e-28	PREDICTED: uncharacterized protein LOC755086 [Strongylocentrotus purpuratus]	--	--	--	--	--	K10605	BRCA1	breast cancer type 1 susceptibility protein	http://www.genome.jp/dbget-bin/www_bget?ko:K10605	O54952	212	4.4147e-19	Breast cancer type 1 susceptibility protein homolog OS=Rattus norvegicus GN=Brca1 PE=1 SV=1	PF16685//PF12861//PF14634//PF04564//PF00097//PF13639//PF03854//PF02891//PF12678//PF11789	zinc RING finger of MSL2//Anaphase-promoting complex subunit 11 RING-H2 finger//zinc-RING finger domain//U-box domain//Zinc finger, C3HC4 type (RING finger)//Ring finger domain//P-11 zinc finger//MIZ/SP-RING zinc finger//RING-H2 zinc finger//Zinc-finger of the MIZ type in Nse subunit	GO:0016567	protein ubiquitination	GO:0046872//GO:0004842//GO:0008270//GO:0061630//GO:0003723//GO:0005515	metal ion binding//ubiquitin-protein transferase activity//zinc ion binding//ubiquitin protein ligase activity//RNA binding//protein binding	GO:0005680	anaphase-promoting complex	KOG4362	Transcriptional regulator BRCA1
c1024_g1	SC	33.00	2.88	1029	--	--	--	--	--	--	--	--	--	--	--	--	--	--	--	--	--	--	--	--	--	--	--	--	--	--	--	--
c10252_g1	SC	3.00	4.68	263	--	--	--	--	--	--	--	--	--	--	--	--	--	--	--	--	--	--	--	--	--	--	--	--	--	--	--	--
c10256_g1	SC	6.00	1.01	640	--	--	--	--	--	--	--	--	--	--	--	--	--	--	--	--	--	--	--	--	--	--	--	--	--	--	--	--
c10257_g1	SC	113.00	4.11	2157	390343039	XP_796747.3	1384	0	PREDICTED: tyrosine aminotransferase [Strongylocentrotus purpuratus]>gi|780075247|ref|XP_011672090.1| PREDICTED: tyrosine aminotransferase [Strongylocentrotus purpuratus]	674053650	XM_008834962.1	45	9.38846e-12	PREDICTED: Nannospalax galili tyrosine aminotransferase (Tat), mRNA	K00815	TAT	tyrosine aminotransferase	http://www.genome.jp/dbget-bin/www_bget?ko:K00815	Q8QZR1	1264	1.59336e-165	Tyrosine aminotransferase OS=Mus musculus GN=Tat PE=1 SV=1	PF01212//PF01134//PF01053//PF00155	Beta-eliminating lyase//Glucose inhibited division protein A//Cys/Met metabolism PLP-dependent enzyme//Aminotransferase class I and II	GO:0009058//GO:0006520//GO:0008033	biosynthetic process//cellular amino acid metabolic process//tRNA processing	GO:0016829//GO:0030170//GO:0050660	lyase activity//pyridoxal phosphate binding//flavin adenine dinucleotide binding	--	--	KOG0257	Kynurenine aminotransferase, glutamine transaminase K
c10258_g1	SC	6.00	4.23	322	--	--	--	--	--	--	--	--	--	--	--	--	--	--	--	--	--	--	--	--	--	--	--	--	--	--	--	--
c1025_g1	SC	18.00	10.88	339	--	--	--	--	--	--	--	--	--	--	--	--	--	--	--	--	--	--	--	--	--	--	--	--	--	--	--	--
c10260_g1	SC	13.00	1.88	710	--	--	--	--	--	--	--	--	--	--	--	--	--	--	--	--	--	--	--	--	--	--	--	--	--	--	--	--
c10260_g2	SC	7.00	2.23	444	--	--	--	--	--	--	--	--	--	--	--	--	--	--	--	--	--	--	--	--	--	--	--	--	--	--	--	--
c10261_g1	SC	1.00	1.33	272	--	--	--	--	--	--	--	--	--	--	--	--	--	--	--	--	--	--	--	--	--	--	--	--	--	--	--	--
c10263_g1	SC	15.00	2.34	674	--	--	--	--	--	--	--	--	--	--	--	--	--	--	--	--	--	--	--	--	--	--	--	--	--	--	--	--
c10263_g2	SC	12.00	1.44	809	--	--	--	--	--	--	--	--	--	--	--	--	--	--	--	--	--	--	--	--	--	--	--	--	--	--	--	--
c10264_g1	SC	6.00	1.74	466	--	--	--	--	--	--	--	--	--	--	--	--	--	--	--	--	--	--	--	--	--	--	--	--	--	--	--	--
c10264_g2	SC	2.00	9.02	220	--	--	--	--	--	--	--	--	--	--	--	--	--	--	--	--	--	--	--	--	--	--	--	--	--	--	--	--
c10265_g1	SC	7.00	3.75	354	--	--	--	--	--	--	--	--	--	--	--	--	--	--	--	--	--	--	--	--	--	--	--	--	--	--	--	--
c10266_g1	SC	28.00	3.37	1018	780000408	XP_011679727.1	229	5.10168e-18	PREDICTED: putative methyltransferase NSUN7 isoform X1 [Strongylocentrotus purpuratus]>gi|780000414|ref|XP_011679731.1| PREDICTED: putative methyltransferase NSUN7 isoform X1 [Strongylocentrotus purpuratus]	--	--	--	--	--	--	--	--	--	--	--	--	--	PF01080	Presenilin	--	--	GO:0004190	aspartic-type endopeptidase activity	GO:0016021	integral component of membrane	--	--
c10268_g1	SC	3.00	3.06	290	--	--	--	--	--	--	--	--	--	--	--	--	--	--	--	--	--	--	--	--	--	--	--	--	--	--	--	--
c10269_g1	SC	1.00	3.24	231	--	--	--	--	--	--	--	--	--	--	--	--	--	--	--	--	--	--	--	--	--	--	--	--	--	--	--	--
c1026_g1	SC	109.00	8.84	1090	390343620	XP_793124.3	583	1.76748e-69	PREDICTED: DTW domain-containing protein 2 [Strongylocentrotus purpuratus]	--	--	--	--	--	--	--	--	--	Q8NBA8	511	7.07147e-60	DTW domain-containing protein 2 OS=Homo sapiens GN=DTWD2 PE=1 SV=1	--	--	--	--	--	--	--	--	KOG4382	Uncharacterized conserved protein, contains DTW domain
c10270_g1	SC	3.00	1.88	335	--	--	--	--	--	--	--	--	--	--	--	--	--	--	--	--	--	--	PF01731	Arylesterase	--	--	GO:0004064	arylesterase activity	--	--	--	--
c10271_g1	SC	3.00	2.42	309	--	--	--	--	--	--	--	--	--	--	--	--	--	--	--	--	--	--	PF00096	Zinc finger, C2H2 type	--	--	GO:0046872	metal ion binding	--	--	--	--
c10271_g2	SC	7.00	2.63	410	--	--	--	--	--	--	--	--	--	--	--	--	--	--	--	--	--	--	--	--	--	--	--	--	--	--	--	--
c10272_g1	SC	57.00	3.44	1459	390337143	XP_781501.3	1362	1.3963e-177	PREDICTED: acyl-CoA dehydrogenase family member 11 isoform X1 [Strongylocentrotus purpuratus]>gi|780014632|ref|XP_011664245.1| PREDICTED: acyl-CoA dehydrogenase family member 11 isoform X1 [Strongylocentrotus purpuratus]	--	--	--	--	--	K11730	ACAD11	acyl-CoA dehydrogenase family member 11	http://www.genome.jp/dbget-bin/www_bget?ko:K11730	Q5ZHT1	1022	2.49283e-128	Acyl-CoA dehydrogenase family member 11 OS=Gallus gallus GN=ACAD11 PE=2 SV=1	PF02771	Acyl-CoA dehydrogenase, N-terminal domain	GO:0008152//GO:0055114	metabolic process//oxidation-reduction process	GO:0016627//GO:0050660	oxidoreductase activity, acting on the CH-CH group of donors//flavin adenine dinucleotide binding	--	--	KOG1469	Predicted acyl-CoA dehydrogenase
c10274_g1	SC	2.00	1.58	311	--	--	--	--	--	--	--	--	--	--	--	--	--	--	--	--	--	--	--	--	--	--	--	--	--	--	--	--
c10274_g2	SC	2.00	4.14	249	--	--	--	--	--	--	--	--	--	--	--	--	--	--	--	--	--	--	--	--	--	--	--	--	--	--	--	--
c10275_g1	SC	2.00	1.86	297	--	--	--	--	--	--	--	--	--	--	--	--	--	--	--	--	--	--	--	--	--	--	--	--	--	--	--	--
c10275_g2	SC	8.00	2.01	503	--	--	--	--	--	--	--	--	--	--	--	--	--	--	--	--	--	--	--	--	--	--	--	--	--	--	--	--
c10276_g1	SC	87.00	5.09	1424	--	--	--	--	--	--	--	--	--	--	--	--	--	--	--	--	--	--	--	--	--	--	--	--	--	--	--	--
c10277_g1	SC	68.00	2.69	1999	260828085	XP_002608994.1	262	1.36549e-21	hypothetical protein BRAFLDRAFT_124005 [Branchiostoma floridae]>gi|229294348|gb|EEN65004.1| hypothetical protein BRAFLDRAFT_124005 [Branchiostoma floridae]	--	--	--	--	--	--	--	--	--	--	--	--	--	PF06220//PF03233//PF04111//PF04977//PF08653	U1 zinc finger//Aphid transmission protein//Autophagy protein Apg6//Septum formation initiator//DASH complex subunit Dam1	GO:0019089//GO:0006914//GO:0007049//GO:0008608	transmission of virus//autophagy//cell cycle//attachment of spindle microtubules to kinetochore	GO:0008270	zinc ion binding	GO:0042729//GO:0072686	DASH complex//mitotic spindle	--	--
c10278_g1	SC	9.00	14.05	263	--	--	--	--	--	--	--	--	--	--	--	--	--	--	--	--	--	--	--	--	--	--	--	--	--	--	--	--
c10279_g1	SC	417.00	8.60	3634	780103263	XP_011675538.1	802	3.15404e-95	PREDICTED: phosphoserine phosphatase [Strongylocentrotus purpuratus]	--	--	--	--	--	K01079	serB, PSPH	phosphoserine phosphatase	http://www.genome.jp/dbget-bin/www_bget?ko:K01079	Q2KHU0	672	1.03153e-78	Phosphoserine phosphatase OS=Bos taurus GN=PSPH PE=2 SV=1	PF03767//PF05822//PF06888//PF05413//PF06373	HAD superfamily, subfamily IIIB (Acid phosphatase)//Pyrimidine 5'-nucleotidase (UMPH-1)//Putative Phosphatase//Putative closterovirus papain-like endopeptidase//Cocaine and amphetamine regulated transcript protein (CART)	GO:0001678//GO:0008152//GO:0019079//GO:0006144//GO:0007186//GO:0008343//GO:0009267//GO:0019497//GO:0000186//GO:0006771//GO:0032099	cellular glucose homeostasis//metabolic process//viral genome replication//purine nucleobase metabolic process//G-protein coupled receptor signaling pathway//adult feeding behavior//cellular response to starvation//hexachlorocyclohexane metabolic process//activation of MAPKK activity//riboflavin metabolic process//negative regulation of appetite	GO:0003968//GO:0003993//GO:0000287//GO:0005524//GO:0008253//GO:0016791//GO:0003723	RNA-directed RNA polymerase activity//acid phosphatase activity//magnesium ion binding//ATP binding//5'-nucleotidase activity//phosphatase activity//RNA binding	GO:0005615//GO:0005737//GO:0031379	extracellular space//cytoplasm//RNA-directed RNA polymerase complex	KOG1615	Phosphoserine phosphatase
c1027_g1	SC	3.00	1.40	374	390363404	XP_784008.3	439	1.62166e-51	PREDICTED: histone deacetylase 2 [Strongylocentrotus purpuratus]	--	--	--	--	--	K06067	HDAC1_2	histone deacetylase 1/2	http://www.genome.jp/dbget-bin/www_bget?ko:K06067	P28606	324	1.59905e-35	Uncharacterized protein SYNPCC7002_A1628 OS=Synechococcus sp. (strain ATCC 27264 / PCC 7002 / PR-6) GN=SYNPCC7002_A1628 PE=3 SV=2	--	--	--	--	--	--	--	--	KOG1342	Histone deacetylase complex, catalytic component RPD3
c10283_g1	SC	10.00	2.94	462	780014088	XP_011664181.1	248	1.19081e-21	PREDICTED: protein RRP5 homolog [Strongylocentrotus purpuratus]	--	--	--	--	--	K14792	RRP5, PDCD11	rRNA biogenesis protein RRP5	http://www.genome.jp/dbget-bin/www_bget?ko:K14792	A7MB10	197	2.47477e-16	Protein RRP5 homolog OS=Bos taurus GN=PDCD11 PE=2 SV=1	PF00575	S1 RNA binding domain	--	--	GO:0003676	nucleic acid binding	--	--	KOG1070	rRNA processing protein Rrp5
c10284_g1	SC	8.00	4.79	340	--	--	--	--	--	--	--	--	--	--	--	--	--	--	--	--	--	--	--	--	--	--	--	--	--	--	--	--
c10285_g1	SC	27.00	2.51	978	780075905	XP_796141.4	901	2.00523e-115	PREDICTED: nucleolar complex protein 4 homolog [Strongylocentrotus purpuratus]	--	--	--	--	--	K14771	NOC4, UTP19	U3 small nucleolar RNA-associated protein 19	http://www.genome.jp/dbget-bin/www_bget?ko:K14771	Q5ZJC7	853	9.70138e-109	Nucleolar complex protein 4 homolog OS=Gallus gallus GN=NOC4L PE=2 SV=1	--	--	--	--	--	--	--	--	KOG2154	Predicted nucleolar protein involved in ribosome biogenesis
c10286_g1	SC	16.00	2.04	775	--	--	--	--	--	--	--	--	--	--	--	--	--	--	--	--	--	--	--	--	--	--	--	--	--	--	--	--
c10287_g1	SC	64.00	2.41	2091	--	--	--	--	--	--	--	--	--	--	--	--	--	--	--	--	--	--	--	--	--	--	--	--	--	--	--	--
c10288_g1	SC	14.00	3.74	486	--	--	--	--	--	--	--	--	--	--	--	--	--	--	--	--	--	--	--	--	--	--	--	--	--	--	--	--
c10288_g2	SC	40.00	2.17	1519	--	--	--	--	--	--	--	--	--	--	--	--	--	--	--	--	--	--	--	--	--	--	--	--	--	--	--	--
c10289_g1	SC	3.00	4.95	260	--	--	--	--	--	--	--	--	--	--	--	--	--	--	--	--	--	--	--	--	--	--	--	--	--	--	--	--
c10290_g1	SC	14.00	1.94	731	--	--	--	--	--	--	--	--	--	--	--	--	--	--	--	--	--	--	--	--	--	--	--	--	--	--	--	--
c10293_g1	SC	121.00	6.26	1583	--	--	--	--	--	--	--	--	--	--	--	--	--	--	--	--	--	--	--	--	--	--	--	--	--	--	--	--
c10294_g1	SC	6.00	7.38	277	--	--	--	--	--	--	--	--	--	--	--	--	--	--	--	--	--	--	--	--	--	--	--	--	--	--	--	--
c10295_g1	SC	11.00	3.68	433	--	--	--	--	--	--	--	--	--	--	--	--	--	--	--	--	--	--	--	--	--	--	--	--	--	--	--	--
c10297_g1	SC	5.00	3.63	319	--	--	--	--	--	--	--	--	--	--	--	--	--	--	--	--	--	--	PF00216	Bacterial DNA-binding protein	--	--	GO:0003677	DNA binding	--	--	--	--
c10298_g1	SC	3.00	1.56	358	--	--	--	--	--	--	--	--	--	--	--	--	--	--	--	--	--	--	--	--	--	--	--	--	--	--	--	--
c10299_g1	SC	7.00	1.80	497	72010325	XP_786900.1	206	4.75949e-17	PREDICTED: histamine N-methyltransferase A [Strongylocentrotus purpuratus]	--	--	--	--	--	--	--	--	--	Q4SBY6	159	3.97268e-12	Histamine N-methyltransferase OS=Tetraodon nigroviridis GN=hnmt PE=3 SV=1	--	--	--	--	--	--	--	--	--	--
c1029_g1	SC	3.00	8.48	236	--	--	--	--	--	--	--	--	--	--	--	--	--	--	--	--	--	--	--	--	--	--	--	--	--	--	--	--
c102_g1	SC	1.00	5.16	216	--	--	--	--	--	--	--	--	--	--	--	--	--	--	--	--	--	--	--	--	--	--	--	--	--	--	--	--
c10302_g1	SC	1.00	3.15	232	--	--	--	--	--	--	--	--	--	--	--	--	--	--	--	--	--	--	--	--	--	--	--	--	--	--	--	--
c10302_g2	SC	19.00	2.23	821	--	--	--	--	--	--	--	--	--	--	--	--	--	--	--	--	--	--	--	--	--	--	--	--	--	--	--	--
c10303_g1	SC	70.00	30.55	384	--	--	--	--	--	--	--	--	--	--	--	--	--	--	--	--	--	--	--	--	--	--	--	--	--	--	--	--
c10304_g1	SC	8.00	2.64	436	--	--	--	--	--	--	--	--	--	--	--	--	--	--	--	--	--	--	--	--	--	--	--	--	--	--	--	--
c10305_g1	SC	29.00	2.03	1229	--	--	--	--	--	--	--	--	--	--	--	--	--	--	--	--	--	--	--	--	--	--	--	--	--	--	--	--
c10306_g1	SC	6.00	2.77	375	--	--	--	--	--	--	--	--	--	--	--	--	--	--	--	--	--	--	--	--	--	--	--	--	--	--	--	--
c10307_g1	SC	19.00	2.37	787	--	--	--	--	--	--	--	--	--	--	--	--	--	--	--	--	--	--	PF01392//PF02861	Fz domain//Clp amino terminal domain, pathogenicity island component	GO:0019538	protein metabolic process	GO:0005515	protein binding	--	--	--	--
c10307_g2	SC	29.00	4.36	691	--	--	--	--	--	--	--	--	--	--	--	--	--	--	--	--	--	--	--	--	--	--	--	--	--	--	--	--
c10308_g1	SC	40.00	2.88	1201	780117924	XP_011677495.1	595	1.17355e-64	PREDICTED: serine/threonine-protein kinase 11-interacting protein [Strongylocentrotus purpuratus]	--	--	--	--	--	--	--	--	--	Q5F479	379	1.01447e-37	Serine/threonine-protein kinase 11-interacting protein OS=Gallus gallus GN=STK11IP PE=2 SV=1	PF00560//PF13855	Leucine Rich Repeat//Leucine rich repeat	--	--	GO:0005515	protein binding	--	--	KOG0531	Protein phosphatase 1, regulatory subunit, and related proteins
c10309_g1	SC	11.00	3.13	470	--	--	--	--	--	--	--	--	--	--	--	--	--	--	--	--	--	--	--	--	--	--	--	--	--	--	--	--
c1030_g1	SC	126.00	2.55	3704	307168259	EFN61481.1	525	7.39173e-55	Transposon-derived Buster3 transposase-like protein, partial [Camponotus floridanus]	--	--	--	--	--	--	--	--	--	--	--	--	--	PF06373	Cocaine and amphetamine regulated transcript protein (CART)	GO:0001678//GO:0009267//GO:0000186//GO:0032099//GO:0008343//GO:0007186	cellular glucose homeostasis//cellular response to starvation//activation of MAPKK activity//negative regulation of appetite//adult feeding behavior//G-protein coupled receptor signaling pathway	--	--	GO:0005615	extracellular space	--	--
c10310_g1	SC	4.00	1.35	432	--	--	--	--	--	--	--	--	--	--	--	--	--	--	--	--	--	--	--	--	--	--	--	--	--	--	--	--
c10311_g1	SC	53.00	4.72	1410	--	--	--	--	--	--	--	--	--	--	--	--	--	--	--	--	--	--	PF07247	Alcohol acetyltransferase	GO:0042967//GO:0006066	acyl-carrier-protein biosynthetic process//alcohol metabolic process	GO:0004026	alcohol O-acetyltransferase activity	--	--	--	--
c10312_g1	SC	22.00	2.17	935	--	--	--	--	--	--	--	--	--	--	--	--	--	--	--	--	--	--	--	--	--	--	--	--	--	--	--	--
c10313_g1	SC	3.00	3.23	286	--	--	--	--	--	--	--	--	--	--	--	--	--	--	--	--	--	--	--	--	--	--	--	--	--	--	--	--
c10314_g1	SC	458.00	26.04	1460	--	--	--	--	--	--	--	--	--	--	--	--	--	--	--	--	--	--	--	--	--	--	--	--	--	--	--	--
c10315_g1	SC	12.00	2.28	593	--	--	--	--	--	--	--	--	--	--	--	--	--	--	--	--	--	--	--	--	--	--	--	--	--	--	--	--
c10316_g1	SC	49.00	6.86	725	291226684	XP_002733319.1	349	1.42901e-37	PREDICTED: von Hippel-Lindau disease tumor suppressor-like [Saccoglossus kowalevskii]	--	--	--	--	--	K03871	VHL	von Hippel-Lindau disease tumor supressor	http://www.genome.jp/dbget-bin/www_bget?ko:K03871	Q64259	166	5.57732e-13	Von Hippel-Lindau disease tumor suppressor OS=Rattus norvegicus GN=Vhl PE=1 SV=1	PF07525	SOCS box	GO:0035556	intracellular signal transduction	--	--	--	--	--	--
c10317_g1	SC	5.00	3.30	329	--	--	--	--	--	--	--	--	--	--	--	--	--	--	--	--	--	--	--	--	--	--	--	--	--	--	--	--
c10318_g1	SC	77.00	10.96	717	--	--	--	--	--	--	--	--	--	--	--	--	--	--	--	--	--	--	--	--	--	--	--	--	--	--	--	--
c1031_g1	SC	7.00	2.56	415	--	--	--	--	--	--	--	--	--	--	--	--	--	--	--	--	--	--	--	--	--	--	--	--	--	--	--	--
c10320_g1	SC	3.00	2.40	310	--	--	--	--	--	--	--	--	--	--	--	--	--	--	--	--	--	--	--	--	--	--	--	--	--	--	--	--
c10320_g2	SC	1.00	1.98	251	--	--	--	--	--	--	--	--	--	--	--	--	--	--	--	--	--	--	--	--	--	--	--	--	--	--	--	--
c10321_g1	SC	41.00	9.39	530	--	--	--	--	--	565388378	XM_006359894.1	49	1.31183e-14	PREDICTED: Solanum tuberosum glycine-rich protein A3-like (LOC102578158), mRNA	--	--	--	--	--	--	--	--	--	--	--	--	--	--	--	--	--	--
c10324_g1	SC	3.00	3.58	279	--	--	--	--	--	--	--	--	--	--	--	--	--	--	--	--	--	--	--	--	--	--	--	--	--	--	--	--
c10326_g1	SC	4.00	4.77	279	--	--	--	--	--	--	--	--	--	--	--	--	--	--	--	--	--	--	--	--	--	--	--	--	--	--	--	--
c10327_g1	SC	11.00	8.33	315	--	--	--	--	--	--	--	--	--	--	--	--	--	--	--	--	--	--	--	--	--	--	--	--	--	--	--	--
c10329_g1	SC	4.00	1.46	415	--	--	--	--	--	--	--	--	--	--	--	--	--	--	--	--	--	--	--	--	--	--	--	--	--	--	--	--
c1032_g1	SC	81.00	4.41	1514	260830597	XP_002610247.1	367	7.65379e-36	hypothetical protein BRAFLDRAFT_126820 [Branchiostoma floridae]>gi|229295611|gb|EEN66257.1| hypothetical protein BRAFLDRAFT_126820 [Branchiostoma floridae]	--	--	--	--	--	K10104	FCN	ficolin	http://www.genome.jp/dbget-bin/www_bget?ko:K10104	Q29042	357	2.25046e-36	Ficolin-1 OS=Sus scrofa GN=FCN1 PE=1 SV=1	PF00008	EGF-like domain	--	--	GO:0005515	protein binding	--	--	KOG2579	Ficolin and related extracellular proteins
c10330_g1	SC	2.00	1.31	330	--	--	--	--	--	--	--	--	--	--	--	--	--	--	--	--	--	--	--	--	--	--	--	--	--	--	--	--
c10332_g1	SC	3.00	1.16	404	--	--	--	--	--	--	--	--	--	--	--	--	--	--	--	--	--	--	--	--	--	--	--	--	--	--	--	--
c10333_g1	SC	6.00	3.26	352	405960831	EKC26705.1	155	3.69091e-10	hypothetical protein CGI_10028239 [Crassostrea gigas]	--	--	--	--	--	--	--	--	--	--	--	--	--	PF01424	R3H domain	--	--	GO:0003676	nucleic acid binding	--	--	--	--
c10333_g2	SC	6.00	4.00	328	676481539	XP_009062409.1	188	2.10533e-15	hypothetical protein LOTGIDRAFT_166752 [Lottia gigantea]>gi|556098364|gb|ESO87016.1| hypothetical protein LOTGIDRAFT_166752 [Lottia gigantea]	--	--	--	--	--	--	--	--	--	Q53RT3	121	3.02103e-07	Retroviral-like aspartic protease 1 OS=Homo sapiens GN=ASPRV1 PE=1 SV=1	--	--	--	--	--	--	--	--	--	--
c10335_g1	SC	13.00	2.18	642	--	--	--	--	--	--	--	--	--	--	--	--	--	--	--	--	--	--	--	--	--	--	--	--	--	--	--	--
c10336_g1	SC	6.00	7.50	276	--	--	--	--	--	--	--	--	--	--	--	--	--	--	--	--	--	--	--	--	--	--	--	--	--	--	--	--
c10337_g1	SC	1.00	2.68	238	--	--	--	--	--	--	--	--	--	--	--	--	--	--	--	--	--	--	--	--	--	--	--	--	--	--	--	--
c10339_g1	SC	1.00	1.36	271	--	--	--	--	--	--	--	--	--	--	--	--	--	--	--	--	--	--	--	--	--	--	--	--	--	--	--	--
c1033_g1	SC	18.00	1.56	1037	780054370	XP_011669579.1	542	2.34924e-62	PREDICTED: G-protein coupled receptor 54 isoform X1 [Strongylocentrotus purpuratus]	--	--	--	--	--	K08374	KISS1R	KISS1 receptor	http://www.genome.jp/dbget-bin/www_bget?ko:K08374	Q6BD04	302	1.59283e-29	G-protein coupled receptor 54 OS=Oreochromis niloticus GN=gpr54 PE=2 SV=1	PF00001	7 transmembrane receptor (rhodopsin family)	GO:0007186	G-protein coupled receptor signaling pathway	GO:0004930	G-protein coupled receptor activity	GO:0016021	integral component of membrane	KOG3656	FOG: 7 transmembrane receptor
c10341_g2	SC	2.00	1.56	312	--	--	--	--	--	--	--	--	--	--	--	--	--	--	--	--	--	--	--	--	--	--	--	--	--	--	--	--
c10342_g1	SC	8.00	4.42	350	780165060	XP_011683651.1	137	1.12017e-07	PREDICTED: organic cation transporter protein-like [Strongylocentrotus purpuratus]	--	--	--	--	--	--	--	--	--	--	--	--	--	--	--	--	--	--	--	--	--	--	--
c10343_g1	SC	11.00	2.88	492	--	--	--	--	--	--	--	--	--	--	--	--	--	--	--	--	--	--	--	--	--	--	--	--	--	--	--	--
c10344_g1	SC	2.00	2.96	266	--	--	--	--	--	--	--	--	--	--	--	--	--	--	--	--	--	--	--	--	--	--	--	--	--	--	--	--
c10344_g2	SC	10.00	1.96	582	--	--	--	--	--	--	--	--	--	--	--	--	--	--	--	--	--	--	--	--	--	--	--	--	--	--	--	--
c10345_g1	SC	9.00	3.31	414	--	--	--	--	--	--	--	--	--	--	--	--	--	--	--	--	--	--	--	--	--	--	--	--	--	--	--	--
c10346_g1	SC	2.00	1.69	411	--	--	--	--	--	--	--	--	--	--	--	--	--	--	--	--	--	--	--	--	--	--	--	--	--	--	--	--
c10347_g1	SC	28.00	3.43	797	390339487	XP_798448.2	671	5.91789e-80	PREDICTED: proton myo-inositol cotransporter [Strongylocentrotus purpuratus]	--	--	--	--	--	K08150	SLC2A13, ITR	MFS transporter, SP family, solute carrier family 2 (myo-inositol transporter), member 13	http://www.genome.jp/dbget-bin/www_bget?ko:K08150	Q96QE2	565	8.54326e-66	Proton myo-inositol cotransporter OS=Homo sapiens GN=SLC2A13 PE=1 SV=3	PF00083//PF07690//PF01437	Sugar (and other) transporter//Major Facilitator Superfamily//Plexin repeat	GO:0055085	transmembrane transport	GO:0022857	transmembrane transporter activity	GO:0016021//GO:0016020	integral component of membrane//membrane	KOG0254	Predicted transporter (major facilitator superfamily)
c10348_g1	SC	3.00	3.32	284	--	--	--	--	--	--	--	--	--	--	--	--	--	--	--	--	--	--	--	--	--	--	--	--	--	--	--	--
c10349_g1	SC	3.00	2.98	292	--	--	--	--	--	--	--	--	--	--	--	--	--	--	--	--	--	--	--	--	--	--	--	--	--	--	--	--
c10349_g2	SC	16.00	2.46	680	--	--	--	--	--	--	--	--	--	--	--	--	--	--	--	--	--	--	--	--	--	--	--	--	--	--	--	--
c10351_g1	SC	42.00	13.54	441	--	--	--	--	--	--	--	--	--	--	--	--	--	--	--	--	--	--	--	--	--	--	--	--	--	--	--	--
c10352_g1	SC	4.00	3.16	311	--	--	--	--	--	--	--	--	--	--	--	--	--	--	--	--	--	--	--	--	--	--	--	--	--	--	--	--
c10353_g1	SC	1.00	8.45	203	--	--	--	--	--	--	--	--	--	--	--	--	--	--	--	--	--	--	--	--	--	--	--	--	--	--	--	--
c10353_g2	SC	77.00	3.48	1780	831221288	XP_012658956.1	552	9.74743e-60	PREDICTED: ATP-binding cassette sub-family D member 4 isoform X2 [Otolemur garnettii]	--	--	--	--	--	K05678	ABCD4, PXMP1L	ATP-binding cassette, subfamily D (ALD), member 4	http://www.genome.jp/dbget-bin/www_bget?ko:K05678	O14678	529	3.26537e-57	ATP-binding cassette sub-family D member 4 OS=Homo sapiens GN=ABCD4 PE=1 SV=1	PF00503//PF04670//PF00270//PF03193//PF00006//PF10662//PF13304//PF00005//PF01580//PF00437//PF04851	G-protein alpha subunit//Gtr1/RagA G protein conserved region//DEAD/DEAH box helicase//Protein of unknown function, DUF258//ATP synthase alpha/beta family, nucleotide-binding domain//Ethanolamine utilisation - propanediol utilisation//AAA domain, putative AbiEii toxin, Type IV TA system//ABC transporter//FtsK/SpoIIIE family//Type II/IV secretion system protein//Type III restriction enzyme, res su…	GO:0006576//GO:0007165//GO:0007186//GO:0006810	cellular biogenic amine metabolic process//signal transduction//G-protein coupled receptor signaling pathway//transport	GO:0016787//GO:0004871//GO:0003677//GO:0000166//GO:0003924//GO:0016887//GO:0005525//GO:0003676//GO:0031683//GO:0019001//GO:0005524	hydrolase activity//signal transducer activity//DNA binding//nucleotide binding//GTPase activity//ATPase activity//GTP binding//nucleic acid binding//G-protein beta/gamma-subunit complex binding//guanyl nucleotide binding//ATP binding	--	--	KOG0060	Long-chain acyl-CoA transporter, ABC superfamily (involved in peroxisome organization and biogenesis)
c10356_g1	SC	6.00	2.02	432	--	--	--	--	--	--	--	--	--	--	--	--	--	--	--	--	--	--	--	--	--	--	--	--	--	--	--	--
c10357_g1	SC	1.00	1.03	289	--	--	--	--	--	--	--	--	--	--	--	--	--	--	--	--	--	--	--	--	--	--	--	--	--	--	--	--
c10358_g1	SC	2.00	11.89	212	--	--	--	--	--	--	--	--	--	--	--	--	--	--	--	--	--	--	--	--	--	--	--	--	--	--	--	--
c10358_g2	SC	7.00	1.65	522	--	--	--	--	--	--	--	--	--	--	--	--	--	--	--	--	--	--	--	--	--	--	--	--	--	--	--	--
c10359_g1	SC	16.00	2.06	770	--	--	--	--	--	--	--	--	--	--	--	--	--	--	--	--	--	--	--	--	--	--	--	--	--	--	--	--
c1035_g1	SC	13.00	2.79	551	--	--	--	--	--	--	--	--	--	--	--	--	--	--	--	--	--	--	--	--	--	--	--	--	--	--	--	--
c10361_g1	SC	4.00	2.11	356	--	--	--	--	--	--	--	--	--	--	--	--	--	--	--	--	--	--	--	--	--	--	--	--	--	--	--	--
c10363_g1	SC	7.00	4.12	342	--	--	--	--	--	--	--	--	--	--	--	--	--	--	--	--	--	--	--	--	--	--	--	--	--	--	--	--
c10364_g1	SC	1.00	8.45	203	--	--	--	--	--	--	--	--	--	--	--	--	--	--	--	--	--	--	--	--	--	--	--	--	--	--	--	--
c10364_g2	SC	2.00	1.18	342	--	--	--	--	--	--	--	--	--	--	--	--	--	--	--	--	--	--	--	--	--	--	--	--	--	--	--	--
c10366_g1	SC	8.00	4.22	356	--	--	--	--	--	--	--	--	--	--	--	--	--	--	--	--	--	--	--	--	--	--	--	--	--	--	--	--
c10369_g1	SC	1.00	1.59	262	--	--	--	--	--	--	--	--	--	--	--	--	--	--	--	--	--	--	--	--	--	--	--	--	--	--	--	--
c1036_g1	SC	23.00	3.01	761	780131602	XP_011679340.1	408	1.21426e-41	PREDICTED: PHD finger protein 12 [Strongylocentrotus purpuratus]	--	--	--	--	--	--	--	--	--	Q5SPL2	361	5.96458e-37	PHD finger protein 12 OS=Mus musculus GN=Phf12 PE=1 SV=1	PF00628	PHD-finger	--	--	GO:0005515	protein binding	--	--	KOG4299	PHD Zn-finger protein
c10372_g1	SC	2.00	1.07	354	780071300	XP_789491.4	496	1.08221e-59	PREDICTED: adenylate kinase 8 [Strongylocentrotus purpuratus]	--	--	--	--	--	K00939	adk, AK	adenylate kinase	http://www.genome.jp/dbget-bin/www_bget?ko:K00939	Q6P618	382	7.38697e-43	Adenylate kinase 8 OS=Xenopus tropicalis GN=ak8 PE=2 SV=1	PF00004//PF02224	ATPase family associated with various cellular activities (AAA)//Cytidylate kinase	GO:0006206//GO:0006139	pyrimidine nucleobase metabolic process//nucleobase-containing compound metabolic process	GO:0004127//GO:0005524	cytidylate kinase activity//ATP binding	--	--	KOG3078	Adenylate kinase
c10373_g1	SC	4.00	3.42	304	--	--	--	--	--	--	--	--	--	--	--	--	--	--	--	--	--	--	--	--	--	--	--	--	--	--	--	--
c10374_g1	SC	3.00	4.43	266	--	--	--	--	--	--	--	--	--	--	--	--	--	--	--	--	--	--	--	--	--	--	--	--	--	--	--	--
c10375_g1	SC	4.00	2.48	336	--	--	--	--	--	--	--	--	--	--	--	--	--	--	--	--	--	--	--	--	--	--	--	--	--	--	--	--
c10376_g1	SC	1.00	3.06	233	--	--	--	--	--	--	--	--	--	--	--	--	--	--	--	--	--	--	--	--	--	--	--	--	--	--	--	--
c10377_g1	SC	8.00	9.40	280	--	--	--	--	--	--	--	--	--	--	--	--	--	--	--	--	--	--	PF07850//PF11857	Renin receptor-like protein//Domain of unknown function (DUF3377)	GO:0007165	signal transduction	GO:0004872//GO:0004222	receptor activity//metalloendopeptidase activity	GO:0016021	integral component of membrane	--	--
c1037_g1	SC	11.00	1.21	862	--	--	--	--	--	--	--	--	--	--	--	--	--	--	--	--	--	--	--	--	--	--	--	--	--	--	--	--
c1037_g2	SC	2.00	1.67	306	--	--	--	--	--	--	--	--	--	--	--	--	--	--	--	--	--	--	--	--	--	--	--	--	--	--	--	--
c10380_g1	SC	22.00	3.48	668	--	--	--	--	--	--	--	--	--	--	--	--	--	--	--	--	--	--	PF01098	Cell cycle protein	GO:0051301	cell division	--	--	GO:0016021	integral component of membrane	--	--
c10384_g1	SC	6.00	2.19	416	--	--	--	--	--	--	--	--	--	--	--	--	--	--	--	--	--	--	PF05932	Tir chaperone protein (CesT) family	GO:0050708	regulation of protein secretion	--	--	GO:0005737	cytoplasm	--	--
c10385_g1	SC	1.00	1.98	251	--	--	--	--	--	--	--	--	--	--	--	--	--	--	--	--	--	--	--	--	--	--	--	--	--	--	--	--
c10386_g1	SC	119.00	3.80	2675	762130077	XP_011448168.1	653	2.05943e-72	PREDICTED: G2/M phase-specific E3 ubiquitin-protein ligase-like [Crassostrea gigas]	--	--	--	--	--	--	--	--	--	Q7L622	449	3.53823e-45	G2/M phase-specific E3 ubiquitin-protein ligase OS=Homo sapiens GN=G2E3 PE=1 SV=1	PF00632	HECT-domain (ubiquitin-transferase)	GO:0016567	protein ubiquitination	GO:0004842	ubiquitin-protein transferase activity	--	--	KOG0940	Ubiquitin protein ligase RSP5/NEDD4
c10387_g1	SC	6.00	1.83	454	--	--	--	--	--	--	--	--	--	--	--	--	--	--	--	--	--	--	--	--	--	--	--	--	--	--	--	--
c10389_g1	SC	13.00	3.10	518	--	--	--	--	--	--	--	--	--	--	--	--	--	--	--	--	--	--	--	--	--	--	--	--	--	--	--	--
c1038_g1	SC	12.00	3.13	493	780056327	XP_011669808.1	516	4.83691e-57	PREDICTED: sacsin [Strongylocentrotus purpuratus]	--	--	--	--	--	K17592	SACS	sacsin	http://www.genome.jp/dbget-bin/www_bget?ko:K17592	Q9NZJ4	391	9.01085e-42	Sacsin OS=Homo sapiens GN=SACS PE=1 SV=2	--	--	--	--	--	--	--	--	--	--
c10390_g1	SC	1.00	0.98	293	--	--	--	--	--	--	--	--	--	--	--	--	--	--	--	--	--	--	--	--	--	--	--	--	--	--	--	--
c10391_g1	SC	1.00	6.91	208	--	--	--	--	--	--	--	--	--	--	--	--	--	--	--	--	--	--	--	--	--	--	--	--	--	--	--	--
c10393_g1	SC	27.00	11.71	385	--	--	--	--	--	--	--	--	--	--	--	--	--	--	--	--	--	--	--	--	--	--	--	--	--	--	--	--
c10394_g1	SC	12.00	2.14	618	--	--	--	--	--	--	--	--	--	--	--	--	--	--	--	--	--	--	--	--	--	--	--	--	--	--	--	--
c10395_g1	SC	15.00	1.89	782	390334792	XP_003724018.1	249	2.85373e-22	PREDICTED: protein dispatched homolog 1 [Strongylocentrotus purpuratus]	--	--	--	--	--	--	--	--	--	Q3TDN0	236	2.34043e-20	Protein dispatched homolog 1 OS=Mus musculus GN=Disp1 PE=1 SV=2	--	--	--	--	--	--	--	--	KOG3664	Predicted patched transmembrane receptor
c10396_g1	SC	22.00	4.11	599	--	--	--	--	--	--	--	--	--	--	--	--	--	--	--	--	--	--	--	--	--	--	--	--	--	--	--	--
c10397_g1	SC	3.00	4.21	269	--	--	--	--	--	--	--	--	--	--	--	--	--	--	--	--	--	--	--	--	--	--	--	--	--	--	--	--
c10398_g1	SC	4.00	2.62	330	--	--	--	--	--	--	--	--	--	--	--	--	--	--	--	--	--	--	--	--	--	--	--	--	--	--	--	--
c10399_g1	SC	12.00	2.57	551	--	--	--	--	--	--	--	--	--	--	--	--	--	--	--	--	--	--	--	--	--	--	--	--	--	--	--	--
c1039_g1	SC	11.00	3.85	424	--	--	--	--	--	--	--	--	--	--	--	--	--	--	--	--	--	--	--	--	--	--	--	--	--	--	--	--
c103_g1	SC	1.00	4.23	222	--	--	--	--	--	--	--	--	--	--	--	--	--	--	--	--	--	--	--	--	--	--	--	--	--	--	--	--
c10400_g1	SC	40.00	3.18	1107	--	--	--	--	--	--	--	--	--	--	--	--	--	--	--	--	--	--	--	--	--	--	--	--	--	--	--	--
c10405_g1	SC	17.00	2.02	816	390370742	XP_785693.3	622	2.54855e-75	PREDICTED: cytochrome P450 26B1 [Strongylocentrotus purpuratus]	--	--	--	--	--	K07437	CYP26A	cytochrome P450, family 26, subfamily A	http://www.genome.jp/dbget-bin/www_bget?ko:K07437	O55127	459	1.96141e-51	Cytochrome P450 26A1 OS=Mus musculus GN=Cyp26a1 PE=2 SV=1	PF00067	Cytochrome P450	GO:0055114	oxidation-reduction process	GO:0016705//GO:0005506//GO:0020037	oxidoreductase activity, acting on paired donors, with incorporation or reduction of molecular oxygen//iron ion binding//heme binding	--	--	KOG0157	Cytochrome P450 CYP4/CYP19/CYP26 subfamilies
c10406_g1	SC	2.00	7.95	224	--	--	--	--	--	--	--	--	--	--	--	--	--	--	--	--	--	--	--	--	--	--	--	--	--	--	--	--
c10407_g1	SC	10.00	1.38	734	--	--	--	--	--	--	--	--	--	--	--	--	--	--	--	--	--	--	PF11112	Pyocin activator protein PrtN	GO:0006355	regulation of transcription, DNA-templated	--	--	--	--	--	--
c10408_g1	SC	6.00	13.59	245	--	--	--	--	--	--	--	--	--	--	--	--	--	--	--	--	--	--	--	--	--	--	--	--	--	--	--	--
c10409_g1	SC	5.00	4.00	310	--	--	--	--	--	--	--	--	--	--	--	--	--	--	--	--	--	--	--	--	--	--	--	--	--	--	--	--
c10410_g1	SC	5.00	2.18	384	--	--	--	--	--	--	--	--	--	--	--	--	--	--	--	--	--	--	--	--	--	--	--	--	--	--	--	--
c10413_g1	SC	4.00	4.77	279	--	--	--	--	--	--	--	--	--	--	--	--	--	--	--	--	--	--	--	--	--	--	--	--	--	--	--	--
c10414_g1	SC	1.00	5.34	215	--	--	--	--	--	--	--	--	--	--	--	--	--	--	--	--	--	--	--	--	--	--	--	--	--	--	--	--
c10416_g1	SC	23.00	2.32	919	--	--	--	--	--	--	--	--	--	--	--	--	--	--	--	--	--	--	PF01253	Translation initiation factor SUI1	GO:0006446//GO:0006413	regulation of translational initiation//translational initiation	GO:0003743	translation initiation factor activity	GO:0005840	ribosome	--	--
c10417_g1	SC	2.00	2.35	280	--	--	--	--	--	--	--	--	--	--	--	--	--	--	--	--	--	--	--	--	--	--	--	--	--	--	--	--
c10418_g1	SC	7.00	2.70	405	--	--	--	--	--	--	--	--	--	--	--	--	--	--	--	--	--	--	--	--	--	--	--	--	--	--	--	--
c10419_g1	SC	1.00	5.95	212	--	--	--	--	--	--	--	--	--	--	--	--	--	--	--	--	--	--	--	--	--	--	--	--	--	--	--	--
c10420_g1	SC	2.00	0.55	477	--	--	--	--	--	--	--	--	--	--	--	--	--	--	--	--	--	--	--	--	--	--	--	--	--	--	--	--
c10421_g1	SC	6.00	3.10	359	--	--	--	--	--	--	--	--	--	--	--	--	--	--	--	--	--	--	--	--	--	--	--	--	--	--	--	--
c10421_g2	SC	10.00	3.38	431	--	--	--	--	--	--	--	--	--	--	--	--	--	--	--	--	--	--	--	--	--	--	--	--	--	--	--	--
c10427_g1	SC	1.00	8.45	203	--	--	--	--	--	--	--	--	--	--	--	--	--	--	--	--	--	--	--	--	--	--	--	--	--	--	--	--
c10428_g1	SC	16.00	3.21	573	--	--	--	--	--	--	--	--	--	--	--	--	--	--	--	--	--	--	--	--	--	--	--	--	--	--	--	--
c10430_g1	SC	6.00	3.63	339	--	--	--	--	--	--	--	--	--	--	--	--	--	--	--	--	--	--	--	--	--	--	--	--	--	--	--	--
c10432_g1	SC	1.00	4.51	220	--	--	--	--	--	--	--	--	--	--	--	--	--	--	--	--	--	--	--	--	--	--	--	--	--	--	--	--
c10433_g1	SC	1.00	3.15	232	--	--	--	--	--	--	--	--	--	--	--	--	--	--	--	--	--	--	--	--	--	--	--	--	--	--	--	--
c10438_g1	SC	8.00	1.66	562	--	--	--	--	--	--	--	--	--	--	--	--	--	--	--	--	--	--	--	--	--	--	--	--	--	--	--	--
c10439_g1	SC	1.00	5.73	213	--	--	--	--	--	--	--	--	--	--	--	--	--	--	--	--	--	--	--	--	--	--	--	--	--	--	--	--
c1043_g1	SC	62.00	2.55	1935	612014202	XP_007490159.1	226	1.15309e-16	PREDICTED: zinc finger protein 300-like [Monodelphis domestica]	--	--	--	--	--	--	--	--	--	Q96PE6	219	2.27168e-17	Zinc finger imprinted 3 OS=Homo sapiens GN=ZIM3 PE=2 SV=1	PF11616//PF13912//PF07545//PF00096//PF13465	WD repeat binding protein EZH2//C2H2-type zinc finger//Vestigial/Tondu family//Zinc finger, C2H2 type//Zinc-finger double domain	GO:0006479//GO:0006554//GO:0006355	protein methylation//lysine catabolic process//regulation of transcription, DNA-templated	GO:0046872//GO:0018024	metal ion binding//histone-lysine N-methyltransferase activity	GO:0005634	nucleus	KOG1721	FOG: Zn-finger
c10441_g1	SC	1.00	4.99	217	--	--	--	--	--	--	--	--	--	--	--	--	--	--	--	--	--	--	PF01783	Ribosomal L32p protein family	GO:0006412//GO:0042254	translation//ribosome biogenesis	GO:0003735	structural constituent of ribosome	GO:0015934//GO:0005840	large ribosomal subunit//ribosome	--	--
c10442_g1	SC	13.00	8.28	333	--	--	--	--	--	--	--	--	--	--	--	--	--	--	--	--	--	--	--	--	--	--	--	--	--	--	--	--
c10443_g1	SC	6.00	4.96	307	--	--	--	--	--	--	--	--	--	--	--	--	--	--	--	--	--	--	--	--	--	--	--	--	--	--	--	--
c10444_g1	SC	10.00	13.79	270	828235925	XP_012566546.1	129	3.98514e-07	PREDICTED: uncharacterized protein LOC105850643 [Hydra vulgaris]	--	--	--	--	--	--	--	--	--	--	--	--	--	--	--	--	--	--	--	--	--	--	--
c10445_g1	SC	19.00	4.51	519	--	--	--	--	--	--	--	--	--	--	--	--	--	--	--	--	--	--	--	--	--	--	--	--	--	--	--	--
c10446_g1	SC	2.00	1.93	294	--	--	--	--	--	--	--	--	--	--	--	--	--	--	--	--	--	--	--	--	--	--	--	--	--	--	--	--
c10447_g1	SC	10.00	4.06	396	--	--	--	--	--	--	--	--	--	--	--	--	--	--	--	--	--	--	--	--	--	--	--	--	--	--	--	--
c10448_g1	SC	5.00	2.85	346	--	--	--	--	--	--	--	--	--	--	--	--	--	--	--	--	--	--	--	--	--	--	--	--	--	--	--	--
c10448_g2	SC	39.00	3.38	1034	--	--	--	--	--	--	--	--	--	--	--	--	--	--	--	--	--	--	--	--	--	--	--	--	--	--	--	--
c10449_g1	SC	9.00	2.09	529	--	--	--	--	--	--	--	--	--	--	--	--	--	--	--	--	--	--	--	--	--	--	--	--	--	--	--	--
c1044_g1	SC	349.00	13.81	2000	675367981	KFM60883.1	1499	0	Ribonucleoside-diphosphate reductase subunit M2, partial [Stegodyphus mimosarum]	10343	X02471.1	240	3.46185e-120	Clam mRNA for ribonucleotide reductase small subunit (P41)	K10808	RRM2	ribonucleoside-diphosphate reductase subunit M2	http://www.genome.jp/dbget-bin/www_bget?ko:K10808	P11157	1463	0	Ribonucleoside-diphosphate reductase subunit M2 OS=Mus musculus GN=Rrm2 PE=1 SV=1	PF00268	Ribonucleotide reductase, small chain	GO:0009186//GO:0055114	deoxyribonucleoside diphosphate metabolic process//oxidation-reduction process	--	--	--	--	KOG1567	Ribonucleotide reductase, beta subunit
c10450_g1	SC	2.00	13.83	208	--	--	--	--	--	--	--	--	--	--	--	--	--	--	--	--	--	--	--	--	--	--	--	--	--	--	--	--
c10453_g1	SC	3.00	7.47	241	--	--	--	--	--	--	--	--	--	--	--	--	--	--	--	--	--	--	--	--	--	--	--	--	--	--	--	--
c10453_g2	SC	7.00	1.50	552	390351100	XP_001199252.2	206	9.10645e-16	PREDICTED: mucin-17 [Strongylocentrotus purpuratus]	--	--	--	--	--	--	--	--	--	Q68DE3	126	3.2757e-07	Basic helix-loop-helix domain-containing protein KIAA2018 OS=Homo sapiens GN=KIAA2018 PE=1 SV=3	PF03127//PF00010//PF07716	GAT domain//Helix-loop-helix DNA-binding domain//Basic region leucine zipper	GO:0006886//GO:0006355	intracellular protein transport//regulation of transcription, DNA-templated	GO:0046983//GO:0043565//GO:0003700	protein dimerization activity//sequence-specific DNA binding//transcription factor activity, sequence-specific DNA binding	GO:0005667//GO:0005622	transcription factor complex//intracellular	--	--
c10455_g1	SC	1.00	2.68	238	808870614	KKF20425.1	142	2.80884e-13	Retrovirus-related Pol polyprotein from type-1 retrotransposable element [Larimichthys crocea]	--	--	--	--	--	--	--	--	--	--	--	--	--	--	--	--	--	--	--	--	--	--	--
c10456_g1	SC	149.00	3.56	3167	780117924	XP_011677495.1	396	4.98367e-36	PREDICTED: serine/threonine-protein kinase 11-interacting protein [Strongylocentrotus purpuratus]	--	--	--	--	--	--	--	--	--	Q8N1F8	218	1.89625e-16	Serine/threonine-protein kinase 11-interacting protein OS=Homo sapiens GN=STK11IP PE=1 SV=3	--	--	--	--	--	--	--	--	--	--
c10459_g1	SC	1.00	2.68	238	--	--	--	--	--	--	--	--	--	--	--	--	--	--	--	--	--	--	PF03123	CAT RNA binding domain	--	--	GO:0003723	RNA binding	--	--	--	--
c1045_g1	SC	8.00	4.53	347	--	--	--	--	--	--	--	--	--	--	--	--	--	--	--	--	--	--	--	--	--	--	--	--	--	--	--	--
c10460_g1	SC	1.00	6.91	208	828207937	XP_012557468.1	138	1.25785e-08	PREDICTED: atrial natriuretic peptide receptor 1-like, partial [Hydra vulgaris]	--	--	--	--	--	--	--	--	--	P18910	123	1.17816e-07	Atrial natriuretic peptide receptor 1 OS=Rattus norvegicus GN=Npr1 PE=1 SV=1	PF07701//PF01916	Heme NO binding associated//Deoxyhypusine synthase	GO:0046039//GO:0006144//GO:0008612//GO:0006182	GTP metabolic process//purine nucleobase metabolic process//peptidyl-lysine modification to peptidyl-hypusine//cGMP biosynthetic process	GO:0004383	guanylate cyclase activity	--	--	KOG1023	Natriuretic peptide receptor, guanylate cyclase
c10461_g1	SC	3.00	3.28	285	704265081	XP_010152260.1	353	1.69297e-39	PREDICTED: N-acetyltransferase 10-like, partial [Eurypyga helias]	768929998	XM_011607566.1	47	8.62438e-14	PREDICTED: Takifugu rubripes N-acetyltransferase 10 (GCN5-related) (nat10), mRNA	K14521	NAT10, KRE33	N-acetyltransferase 10	http://www.genome.jp/dbget-bin/www_bget?ko:K14521	Q8K224	342	1.20038e-36	N-acetyltransferase 10 OS=Mus musculus GN=Nat10 PE=2 SV=1	--	--	--	--	--	--	--	--	KOG2036	Predicted P-loop ATPase fused to an acetyltransferase
c10465_g1	SC	5.00	1.69	431	--	--	--	--	--	--	--	--	--	--	--	--	--	--	--	--	--	--	--	--	--	--	--	--	--	--	--	--
c10466_g1	SC	36.00	2.42	1271	--	--	--	--	--	--	--	--	--	--	--	--	--	--	--	--	--	--	PF04750	FAR-17a/AIG1-like protein	--	--	--	--	GO:0016021	integral component of membrane	--	--
c10466_g2	SC	62.00	2.84	1760	780088465	XP_011673727.1	209	1.26331e-14	PREDICTED: uncharacterized protein LOC105442823 [Strongylocentrotus purpuratus]	--	--	--	--	--	--	--	--	--	--	--	--	--	--	--	--	--	--	--	--	--	--	--
c10467_g1	SC	107.00	7.24	1262	--	--	--	--	--	--	--	--	--	--	--	--	--	--	--	--	--	--	--	--	--	--	--	--	--	--	--	--
c10468_g1	SC	5.00	5.62	283	--	--	--	--	--	--	--	--	--	--	--	--	--	--	--	--	--	--	--	--	--	--	--	--	--	--	--	--
c10469_g1	SC	18.00	2.19	800	779996340	XP_011675091.1	501	7.06424e-57	PREDICTED: deleted in malignant brain tumors 1 protein [Strongylocentrotus purpuratus]	--	--	--	--	--	K09624	PRSS12	protease, serine, 12 (neurotrypsin, motopsin)	http://www.genome.jp/dbget-bin/www_bget?ko:K09624	O08762	454	5.87994e-50	Neurotrypsin OS=Mus musculus GN=Prss12 PE=2 SV=1	PF15494//PF00530	Scavenger receptor cysteine-rich domain//Scavenger receptor cysteine-rich domain	GO:0007165	signal transduction	GO:0005044	scavenger receptor activity	GO:0016020	membrane	--	--
c1046_g1	SC	135.00	9.76	1196	--	--	--	--	--	--	--	--	--	--	--	--	--	--	--	--	--	--	--	--	--	--	--	--	--	--	--	--
c10470_g1	SC	20.00	2.41	851	115638677	XP_786610.2	447	1.86523e-48	PREDICTED: putative sodium-coupled neutral amino acid transporter 7 [Strongylocentrotus purpuratus]	--	--	--	--	--	K14994	SLC38A7_8	solute carrier family 38 (sodium-coupled neutral amino acid transporter), member 7/8	http://www.genome.jp/dbget-bin/www_bget?ko:K14994	Q6DEL1	324	9.7354e-33	Putative sodium-coupled neutral amino acid transporter 7 OS=Danio rerio GN=slc38a7 PE=2 SV=1	PF02322	Cytochrome bd terminal oxidase subunit II	GO:0055114	oxidation-reduction process	--	--	GO:0016020	membrane	--	--
c10471_g1	SC	14.00	2.25	660	780141797	XP_011680762.1	164	2.54145e-10	PREDICTED: uncharacterized protein LOC583642 [Strongylocentrotus purpuratus]	--	--	--	--	--	--	--	--	--	--	--	--	--	--	--	--	--	--	--	--	--	--	--
c10472_g1	SC	26.00	2.61	923	--	--	--	--	--	--	--	--	--	--	--	--	--	--	--	--	--	--	--	--	--	--	--	--	--	--	--	--
c10474_g1	SC	38.00	6.06	664	--	--	--	--	--	--	--	--	--	--	--	--	--	--	--	--	--	--	--	--	--	--	--	--	--	--	--	--
c10475_g1	SC	7.00	2.18	449	820995797	XP_012368240.1	153	2.56709e-09	PREDICTED: zinc finger protein 709-like [Octodon degus]	--	--	--	--	--	--	--	--	--	Q9NZV7	137	6.11447e-09	Zinc finger imprinted 2 OS=Homo sapiens GN=ZIM2 PE=2 SV=1	PF00096//PF13465	Zinc finger, C2H2 type//Zinc-finger double domain	--	--	GO:0046872	metal ion binding	--	--	KOG1721	FOG: Zn-finger
c10477_g1	SC	4.00	2.40	340	--	--	--	--	--	--	--	--	--	--	--	--	--	--	--	--	--	--	--	--	--	--	--	--	--	--	--	--
c10479_g1	SC	1.00	3.74	226	--	--	--	--	--	--	--	--	--	--	--	--	--	--	--	--	--	--	--	--	--	--	--	--	--	--	--	--
c10479_g2	SC	1.00	0.78	312	--	--	--	--	--	--	--	--	--	--	--	--	--	--	--	--	--	--	--	--	--	--	--	--	--	--	--	--
c1047_g1	SC	1.00	7.48	206	--	--	--	--	--	--	--	--	--	--	--	--	--	--	--	--	--	--	--	--	--	--	--	--	--	--	--	--
c10483_g1	SC	3.00	2.79	297	--	--	--	--	--	--	--	--	--	--	--	--	--	--	--	--	--	--	--	--	--	--	--	--	--	--	--	--
c10483_g2	SC	5.00	2.62	357	--	--	--	--	--	--	--	--	--	--	--	--	--	--	--	--	--	--	--	--	--	--	--	--	--	--	--	--
c10484_g1	SC	33.00	10.40	446	--	--	--	--	--	--	--	--	--	--	--	--	--	--	--	--	--	--	--	--	--	--	--	--	--	--	--	--
c10485_g1	SC	4.00	2.34	343	762110444	XP_011437916.1	319	4.85988e-33	PREDICTED: uncharacterized protein LOC105335635 [Crassostrea gigas]>gi|762110446|ref|XP_011437917.1| PREDICTED: uncharacterized protein LOC105335635 [Crassostrea gigas]>gi|762110448|ref|XP_011437918.1| PREDICTED: uncharacterized protein LOC105335635 [Crassostrea gigas]	780165172	XR_974070.1	36	1.38215e-07	PREDICTED: Strongylocentrotus purpuratus uncharacterized LOC100893343 (LOC100893343), transcript variant X3, misc_RNA	--	--	--	--	--	--	--	--	PF00665	Integrase core domain	GO:0015074	DNA integration	--	--	--	--	--	--
c10486_g1	SC	11.00	2.19	576	--	--	--	--	--	--	--	--	--	--	--	--	--	--	--	--	--	--	--	--	--	--	--	--	--	--	--	--
c10487_g1	SC	14.00	2.95	557	--	--	--	--	--	--	--	--	--	--	--	--	--	--	--	--	--	--	PF00060	Ligand-gated ion channel	GO:0007165//GO:0007268//GO:0006811	signal transduction//synaptic transmission//ion transport	GO:0004970	ionotropic glutamate receptor activity	GO:0016020	membrane	--	--
c10488_g1	SC	5.00	2.72	352	--	--	--	--	--	--	--	--	--	--	--	--	--	--	--	--	--	--	--	--	--	--	--	--	--	--	--	--
c10489_g1	SC	19.00	12.31	331	--	--	--	--	--	--	--	--	--	--	--	--	--	--	--	--	--	--	--	--	--	--	--	--	--	--	--	--
c1048_g1	SC	409.00	18.24	1800	--	--	--	--	--	--	--	--	--	--	--	--	--	--	--	--	--	--	--	--	--	--	--	--	--	--	--	--
c10493_g1	SC	11.00	2.71	508	--	--	--	--	--	--	--	--	--	--	--	--	--	--	--	--	--	--	--	--	--	--	--	--	--	--	--	--
c10494_g1	SC	2.00	15.57	205	--	--	--	--	--	--	--	--	--	--	--	--	--	--	--	--	--	--	--	--	--	--	--	--	--	--	--	--
c10495_g1	SC	2.00	1.33	328	--	--	--	--	--	--	--	--	--	--	--	--	--	--	--	--	--	--	--	--	--	--	--	--	--	--	--	--
c10495_g2	SC	1.00	1.86	254	390348168	XP_003726954.1	138	4.50767e-11	PREDICTED: uncharacterized protein LOC100892812 [Strongylocentrotus purpuratus]	--	--	--	--	--	--	--	--	--	--	--	--	--	--	--	--	--	--	--	--	--	--	--
c10499_g1	SC	17.00	2.64	675	--	--	--	--	--	--	--	--	--	--	--	--	--	--	--	--	--	--	--	--	--	--	--	--	--	--	--	--
c1049_g1	SC	2.00	0.73	415	--	--	--	--	--	--	--	--	--	--	--	--	--	--	--	--	--	--	--	--	--	--	--	--	--	--	--	--
c104_g1	SC	4.00	1.65	393	--	--	--	--	--	--	--	--	--	--	--	--	--	--	--	--	--	--	--	--	--	--	--	--	--	--	--	--
c10501_g1	SC	8.00	2.18	481	--	--	--	--	--	--	--	--	--	--	--	--	--	--	--	--	--	--	--	--	--	--	--	--	--	--	--	--
c10503_g1	SC	4.00	8.65	247	--	--	--	--	--	--	--	--	--	--	--	--	--	--	--	--	--	--	--	--	--	--	--	--	--	--	--	--
c10505_g1	SC	78.00	3.15	1963	694630563	XP_009491226.1	340	4.82327e-34	PREDICTED: ribosome production factor 2 homolog, partial [Pelecanus crispus]	--	--	--	--	--	K14847	RPF2	ribosome production factor 2	http://www.genome.jp/dbget-bin/www_bget?ko:K14847	Q9JJ80	309	1.3727e-29	Ribosome production factor 2 homolog OS=Mus musculus GN=Rpf2 PE=2 SV=2	--	--	--	--	--	--	--	--	KOG3031	Protein required for biogenesis of the ribosomal 60S subunit
c10506_g1	SC	4.00	1.57	402	--	--	--	--	--	--	--	--	--	--	--	--	--	--	--	--	--	--	--	--	--	--	--	--	--	--	--	--
c10507_g1	SC	8.00	2.78	425	--	--	--	--	--	--	--	--	--	--	--	--	--	--	--	--	--	--	--	--	--	--	--	--	--	--	--	--
c10508_g1	SC	1.00	3.06	233	--	--	--	--	--	--	--	--	--	--	--	--	--	--	--	--	--	--	--	--	--	--	--	--	--	--	--	--
c10509_g1	SC	12.00	1.57	762	--	--	--	--	--	--	--	--	--	--	--	--	--	--	--	--	--	--	--	--	--	--	--	--	--	--	--	--
c1050_g1	SC	15.00	3.34	539	--	--	--	--	--	--	--	--	--	--	--	--	--	--	--	--	--	--	--	--	--	--	--	--	--	--	--	--
c10510_g1	SC	3.00	1.81	339	443725261	ELU12941.1	132	6.16707e-07	hypothetical protein CAPTEDRAFT_198744 [Capitella teleta]	--	--	--	--	--	--	--	--	--	--	--	--	--	PF00941	FAD binding domain in molybdopterin dehydrogenase	GO:0055114	oxidation-reduction process	GO:0016491	oxidoreductase activity	--	--	--	--
c10511_g1	SC	9.00	2.09	637	675385655	KFM78552.1	686	1.39987e-88	Protein unc-13-like protein, partial [Stegodyphus mimosarum]	--	--	--	--	--	K15293	UNC13, MUNC13	protein unc-13	http://www.genome.jp/dbget-bin/www_bget?ko:K15293	O14795	669	1.35046e-78	Protein unc-13 homolog B OS=Homo sapiens GN=UNC13B PE=1 SV=2	PF00165//PF00130	Bacterial regulatory helix-turn-helix proteins, AraC family//Phorbol esters/diacylglycerol binding domain (C1 domain)	GO:0035556//GO:0006355	intracellular signal transduction//regulation of transcription, DNA-templated	GO:0003700//GO:0043565	transcription factor activity, sequence-specific DNA binding//sequence-specific DNA binding	GO:0005667	transcription factor complex	KOG1011	Neurotransmitter release regulator, UNC-13
c10512_g1	SC	5.00	11.07	246	--	--	--	--	--	--	--	--	--	--	--	--	--	--	--	--	--	--	--	--	--	--	--	--	--	--	--	--
c10516_g1	SC	4.00	3.27	308	--	--	--	--	--	--	--	--	--	--	--	--	--	--	--	--	--	--	--	--	--	--	--	--	--	--	--	--
c1051_g1	SC	6.00	3.66	338	--	--	--	--	--	--	--	--	--	--	--	--	--	--	--	--	--	--	PF00752	XPG N-terminal domain	GO:0006281	DNA repair	GO:0004518	nuclease activity	--	--	--	--
c10522_g1	SC	8.00	6.84	304	--	--	--	--	--	--	--	--	--	--	--	--	--	--	--	--	--	--	PF17112//PF00760	Mitochondrial import receptor subunit Tom6, fungal//Cucumovirus coat protein	GO:0030150	protein import into mitochondrial matrix	--	--	GO:0005742//GO:0019028	mitochondrial outer membrane translocase complex//viral capsid	--	--
c10523_g1	SC	1.00	0.84	306	--	--	--	--	--	--	--	--	--	--	--	--	--	--	--	--	--	--	--	--	--	--	--	--	--	--	--	--
c10524_g1	SC	4.00	1.78	381	--	--	--	--	--	--	--	--	--	--	--	--	--	--	--	--	--	--	--	--	--	--	--	--	--	--	--	--
c10526_g1	SC	2.00	11.07	214	--	--	--	--	--	--	--	--	--	--	--	--	--	--	--	--	--	--	--	--	--	--	--	--	--	--	--	--
c10528_g1	SC	32.00	3.51	864	--	--	--	--	--	--	--	--	--	--	--	--	--	--	--	--	--	--	--	--	--	--	--	--	--	--	--	--
c10531_g1	SC	1.00	1.72	328	--	--	--	--	--	--	--	--	--	--	--	--	--	--	--	--	--	--	--	--	--	--	--	--	--	--	--	--
c10534_g1	SC	43.00	27.62	332	--	--	--	--	--	--	--	--	--	--	--	--	--	--	--	--	--	--	--	--	--	--	--	--	--	--	--	--
c10535_g2	SC	1.00	2.12	248	--	--	--	--	--	--	--	--	--	--	--	--	--	--	--	--	--	--	--	--	--	--	--	--	--	--	--	--
c10536_g1	SC	6.00	2.72	378	--	--	--	--	--	--	--	--	--	--	--	--	--	--	--	--	--	--	--	--	--	--	--	--	--	--	--	--
c10537_g1	SC	16.00	2.72	636	--	--	--	--	--	--	--	--	--	--	--	--	--	--	--	--	--	--	--	--	--	--	--	--	--	--	--	--
c10537_g2	SC	34.00	2.24	1289	780164161	XP_784363.3	544	1.08506e-61	PREDICTED: centrosomal protein of 41 kDa B isoform X1 [Strongylocentrotus purpuratus]	--	--	--	--	--	K16455	CEP41, TSGA14	centrosomal protein CEP41	http://www.genome.jp/dbget-bin/www_bget?ko:K16455	A0JPH7	461	4.7157e-51	Centrosomal protein of 41 kDa B OS=Xenopus laevis GN=cep41-b PE=2 SV=1	--	--	--	--	--	--	--	--	--	--
c10538_g1	SC	2.00	1.12	348	--	--	--	--	--	--	--	--	--	--	--	--	--	--	--	--	--	--	--	--	--	--	--	--	--	--	--	--
c10539_g1	SC	1.00	3.97	224	--	--	--	--	--	--	--	--	--	--	--	--	--	--	--	--	--	--	--	--	--	--	--	--	--	--	--	--
c1053_g1	SC	1.00	2.32	244	--	--	--	--	--	--	--	--	--	--	--	--	--	--	--	--	--	--	--	--	--	--	--	--	--	--	--	--
c10540_g1	SC	1.00	1.21	278	--	--	--	--	--	--	--	--	--	--	--	--	--	--	--	--	--	--	--	--	--	--	--	--	--	--	--	--
c10541_g1	SC	4.00	1.91	370	390337744	XP_003724629.1	258	4.25957e-26	PREDICTED: phosphatidylinositol N-acetylglucosaminyltransferase subunit P [Strongylocentrotus purpuratus]	--	--	--	--	--	K03861	PIGP, GPI19, DSCR5	phosphatidylinositol glycan, class P	http://www.genome.jp/dbget-bin/www_bget?ko:K03861	P57054	216	5.09734e-21	Phosphatidylinositol N-acetylglucosaminyltransferase subunit P OS=Homo sapiens GN=PIGP PE=1 SV=3	PF07297	Dolichol phosphate-mannose biosynthesis regulatory protein (DPM2)	GO:0009059	macromolecule biosynthetic process	--	--	GO:0030176	integral component of endoplasmic reticulum membrane	KOG2257	N-acetylglucosaminyltransferase complex, subunit PIG-P, required for phosphatidylinositol biosynthesis
c10542_g1	SC	26.00	5.11	581	--	--	--	--	--	--	--	--	--	--	--	--	--	--	--	--	--	--	--	--	--	--	--	--	--	--	--	--
c10545_g1	SC	2.00	4.64	244	780018700	XP_011664814.1	175	7.7984e-14	PREDICTED: clathrin heavy chain 1 [Strongylocentrotus purpuratus]	--	--	--	--	--	--	--	--	--	P11442	125	7.55028e-08	Clathrin heavy chain 1 OS=Rattus norvegicus GN=Cltc PE=1 SV=3	--	--	--	--	--	--	--	--	KOG0985	Vesicle coat protein clathrin, heavy chain
c10546_g1	SC	7.00	2.37	431	--	--	--	--	--	--	--	--	--	--	--	--	--	--	--	--	--	--	--	--	--	--	--	--	--	--	--	--
c10548_g1	SC	4.00	2.24	348	--	--	--	--	--	--	--	--	--	--	--	--	--	--	--	--	--	--	--	--	--	--	--	--	--	--	--	--
c10549_g1	SC	50.00	8.31	719	--	--	--	--	--	--	--	--	--	--	--	--	--	--	--	--	--	--	--	--	--	--	--	--	--	--	--	--
c1054_g1	SC	80.00	4.97	1355	--	--	--	--	--	--	--	--	--	--	--	--	--	--	--	--	--	--	--	--	--	--	--	--	--	--	--	--
c10550_g1	SC	5.00	1.60	443	--	--	--	--	--	--	--	--	--	--	--	--	--	--	--	--	--	--	--	--	--	--	--	--	--	--	--	--
c10550_g2	SC	6.00	2.49	392	--	--	--	--	--	--	--	--	--	--	--	--	--	--	--	--	--	--	--	--	--	--	--	--	--	--	--	--
c10551_g1	SC	7.00	2.13	454	--	--	--	--	--	--	--	--	--	--	--	--	--	--	--	--	--	--	--	--	--	--	--	--	--	--	--	--
c10553_g1	SC	2.00	3.37	259	--	--	--	--	--	--	--	--	--	--	--	--	--	--	--	--	--	--	--	--	--	--	--	--	--	--	--	--
c10554_g1	SC	18.00	9.57	355	--	--	--	--	--	--	--	--	--	--	--	--	--	--	--	--	--	--	--	--	--	--	--	--	--	--	--	--
c10555_g1	SC	5.00	1.93	405	--	--	--	--	--	--	--	--	--	--	--	--	--	--	--	--	--	--	--	--	--	--	--	--	--	--	--	--
c10556_g1	SC	3.00	1.66	350	260812251	XP_002600834.1	319	8.10299e-32	hypothetical protein BRAFLDRAFT_279100 [Branchiostoma floridae]>gi|229286124|gb|EEN56846.1| hypothetical protein BRAFLDRAFT_279100 [Branchiostoma floridae]	--	--	--	--	--	K05294	PGAP1	glycosylphosphatidylinositol deacylase	http://www.genome.jp/dbget-bin/www_bget?ko:K05294	Q765A7	244	4.6944e-23	GPI inositol-deacylase OS=Rattus norvegicus GN=Pgap1 PE=1 SV=1	--	--	GO:0006505//GO:0006886	GPI anchor metabolic process//intracellular protein transport	GO:0016788	hydrolase activity, acting on ester bonds	GO:0031227	intrinsic component of endoplasmic reticulum membrane	KOG3724	Negative regulator of COPII vesicle formation
c10557_g1	SC	5.00	5.54	284	--	--	--	--	--	--	--	--	--	--	--	--	--	--	--	--	--	--	--	--	--	--	--	--	--	--	--	--
c10559_g1	SC	1.00	3.74	226	--	--	--	--	--	--	--	--	--	--	--	--	--	--	--	--	--	--	--	--	--	--	--	--	--	--	--	--
c1055_g1	SC	78.00	3.74	1690	--	--	--	--	--	--	--	--	--	--	--	--	--	--	--	--	--	--	--	--	--	--	--	--	--	--	--	--
c10560_g1	SC	7.00	5.47	312	--	--	--	--	--	--	--	--	--	--	--	--	--	--	--	--	--	--	--	--	--	--	--	--	--	--	--	--
c10564_g1	SC	15.00	2.09	728	--	--	--	--	--	--	--	--	--	--	--	--	--	--	--	--	--	--	--	--	--	--	--	--	--	--	--	--
c10565_g1	SC	11.00	2.88	492	--	--	--	--	--	--	--	--	--	--	--	--	--	--	--	--	--	--	--	--	--	--	--	--	--	--	--	--
c10566_g1	SC	16.00	2.25	734	676487918	XP_009064451.1	218	6.25752e-17	hypothetical protein LOTGIDRAFT_236059 [Lottia gigantea]>gi|556096177|gb|ESO84829.1| hypothetical protein LOTGIDRAFT_236059 [Lottia gigantea]	--	--	--	--	--	--	--	--	--	--	--	--	--	PF06414//PF01443//PF00931//PF02562	Zeta toxin//Viral (Superfamily 1) RNA helicase//NB-ARC domain//PhoH-like protein	--	--	GO:0016301//GO:0005524//GO:0043531	kinase activity//ATP binding//ADP binding	--	--	--	--
c10568_g1	SC	4.00	2.34	343	--	--	--	--	--	--	--	--	--	--	--	--	--	--	--	--	--	--	--	--	--	--	--	--	--	--	--	--
c10568_g2	SC	5.00	2.60	358	--	--	--	--	--	--	--	--	--	--	--	--	--	--	--	--	--	--	--	--	--	--	--	--	--	--	--	--
c10569_g1	SC	6.00	2.56	388	780171510	XP_011660632.1	354	4.31623e-36	PREDICTED: androglobin isoform X23 [Strongylocentrotus purpuratus]	--	--	--	--	--	--	--	--	--	--	--	--	--	--	--	--	--	--	--	--	--	--	--
c10570_g1	SC	3.00	2.60	303	--	--	--	--	--	--	--	--	--	--	--	--	--	--	--	--	--	--	--	--	--	--	--	--	--	--	--	--
c10572_g1	SC	12.00	17.43	267	--	--	--	--	--	--	--	--	--	--	--	--	--	--	--	--	--	--	--	--	--	--	--	--	--	--	--	--
c10573_g1	SC	11.00	3.35	454	--	--	--	--	--	--	--	--	--	--	--	--	--	--	--	--	--	--	--	--	--	--	--	--	--	--	--	--
c10576_g1	SC	2.00	17.64	202	--	--	--	--	--	--	--	--	--	--	--	--	--	--	--	--	--	--	--	--	--	--	--	--	--	--	--	--
c10578_g1	SC	30.00	2.79	980	115910592	XP_794435.2	154	1.75753e-08	PREDICTED: IQ and ubiquitin-like domain-containing protein isoform X2 [Strongylocentrotus purpuratus]>gi|390356669|ref|XP_003728839.1| PREDICTED: IQ and ubiquitin-like domain-containing protein isoform X1 [Strongylocentrotus purpuratus]	--	--	--	--	--	--	--	--	--	--	--	--	--	PF03699	Uncharacterised protein family (UPF0182)	--	--	--	--	GO:0016021	integral component of membrane	--	--
c10579_g1	SC	9.00	2.29	499	780070958	XP_003725645.2	343	3.28213e-35	PREDICTED: transcription termination factor 2 [Strongylocentrotus purpuratus]	--	--	--	--	--	K15173	TTF2	transcription termination factor 2	http://www.genome.jp/dbget-bin/www_bget?ko:K15173	Q5NC05	263	7.76285e-25	Transcription termination factor 2 OS=Mus musculus GN=Ttf2 PE=1 SV=2	PF00176	SNF2 family N-terminal domain	--	--	GO:0005524	ATP binding	--	--	KOG4439	RNA polymerase II transcription termination factor TTF2/lodestar, DEAD-box superfamily
c1057_g1	SC	44.00	18.63	389	--	--	--	--	--	--	--	--	--	--	--	--	--	--	--	--	--	--	--	--	--	--	--	--	--	--	--	--
c10582_g1	SC	4.00	12.25	233	--	--	--	--	--	--	--	--	--	--	--	--	--	--	--	--	--	--	--	--	--	--	--	--	--	--	--	--
c10583_g1	SC	3.00	2.35	312	--	--	--	--	--	--	--	--	--	--	--	--	--	--	--	--	--	--	--	--	--	--	--	--	--	--	--	--
c10584_g1	SC	3.00	2.83	296	--	--	--	--	--	--	--	--	--	--	--	--	--	--	--	--	--	--	--	--	--	--	--	--	--	--	--	--
c10585_g1	SC	13.00	2.70	562	390336746	XP_799305.3	680	3.84313e-82	PREDICTED: ATP-citrate synthase [Strongylocentrotus purpuratus]	--	--	--	--	--	K01648	ACLY	ATP citrate (pro-S)-lyase	http://www.genome.jp/dbget-bin/www_bget?ko:K01648	Q2TCH3	428	1.07126e-46	ATP-citrate synthase OS=Ovis aries GN=ACLY PE=2 SV=1	PF00549//PF02234	CoA-ligase//Cyclin-dependent kinase inhibitor	GO:0045859//GO:0007050//GO:0008152	regulation of protein kinase activity//cell cycle arrest//metabolic process	GO:0003824//GO:0004861	catalytic activity//cyclin-dependent protein serine/threonine kinase inhibitor activity	GO:0005634	nucleus	KOG1254	ATP-citrate lyase
c10586_g1	SC	3.00	4.28	268	--	--	--	--	--	--	--	--	--	--	--	--	--	--	--	--	--	--	--	--	--	--	--	--	--	--	--	--
c10587_g1	SC	4.00	5.81	267	--	--	--	--	--	--	--	--	--	--	--	--	--	--	--	--	--	--	--	--	--	--	--	--	--	--	--	--
c10589_g1	SC	10.00	2.61	492	--	--	--	--	--	--	--	--	--	--	--	--	--	--	--	--	--	--	--	--	--	--	--	--	--	--	--	--
c1058_g1	SC	7.00	1.93	478	--	--	--	--	--	--	--	--	--	--	--	--	--	--	--	--	--	--	--	--	--	--	--	--	--	--	--	--
c10590_g1	SC	6.00	4.74	311	--	--	--	--	--	--	--	--	--	--	--	--	--	--	--	--	--	--	--	--	--	--	--	--	--	--	--	--
c10592_g1	SC	12.00	2.50	560	--	--	--	--	--	--	--	--	--	--	--	--	--	--	--	--	--	--	--	--	--	--	--	--	--	--	--	--
c10593_g1	SC	5.00	2.24	380	--	--	--	--	--	--	--	--	--	--	--	--	--	--	--	--	--	--	--	--	--	--	--	--	--	--	--	--
c10594_g1	SC	4.00	2.50	335	--	--	--	--	--	--	--	--	--	--	--	--	--	--	--	--	--	--	--	--	--	--	--	--	--	--	--	--
c10595_g1	SC	2.00	4.98	241	--	--	--	--	--	--	--	--	--	--	--	--	--	--	--	--	--	--	--	--	--	--	--	--	--	--	--	--
c10596_g1	SC	9.00	2.21	509	780008613	XP_011663455.1	138	2.46489e-07	PREDICTED: fibrillin-1 [Strongylocentrotus purpuratus]	--	--	--	--	--	--	--	--	--	--	--	--	--	PF00008//PF07645	EGF-like domain//Calcium-binding EGF domain	--	--	GO:0005509//GO:0005515	calcium ion binding//protein binding	--	--	--	--
c10597_g1	SC	11.00	2.81	498	--	--	--	--	--	--	--	--	--	--	--	--	--	--	--	--	--	--	--	--	--	--	--	--	--	--	--	--
c10598_g1	SC	8.00	6.15	393	--	--	--	--	--	--	--	--	--	--	--	--	--	--	--	--	--	--	PF00751	DM DNA binding domain	GO:0006355	regulation of transcription, DNA-templated	GO:0043565	sequence-specific DNA binding	--	--	--	--
c10600_g1	SC	19.00	6.36	433	--	--	--	--	--	--	--	--	--	--	--	--	--	--	--	--	--	--	--	--	--	--	--	--	--	--	--	--
c10602_g1	SC	304.00	106.32	424	--	--	--	--	--	--	--	--	--	--	--	--	--	--	--	--	--	--	--	--	--	--	--	--	--	--	--	--
c10603_g1	SC	1.00	0.63	335	--	--	--	--	--	--	--	--	--	--	--	--	--	--	--	--	--	--	--	--	--	--	--	--	--	--	--	--
c10604_g1	SC	57.00	2.86	1625	675376757	KFM69659.1	1217	4.05993e-160	Dual specificity mitogen-activated protein kinase kinase 7, partial [Stegodyphus mimosarum]	--	--	--	--	--	K04431	MAP2K7, MKK7	mitogen-activated protein kinase kinase 7	http://www.genome.jp/dbget-bin/www_bget?ko:K04431	O14733	1134	6.13249e-149	Dual specificity mitogen-activated protein kinase kinase 7 OS=Homo sapiens GN=MAP2K7 PE=1 SV=2	PF00069//PF07714//PF10152	Protein kinase domain//Protein tyrosine kinase//Predicted coiled-coil domain-containing protein (DUF2360)	GO:0006468	protein phosphorylation	GO:0004672//GO:0005524	protein kinase activity//ATP binding	GO:0071203	WASH complex	KOG0983	Mitogen-activated protein kinase (MAPK) kinase MKK7/JNKK2
c10606_g1	SC	3.00	1.50	363	--	--	--	--	--	--	--	--	--	--	--	--	--	--	--	--	--	--	--	--	--	--	--	--	--	--	--	--
c10607_g1	SC	3.00	1.20	399	--	--	--	--	--	--	--	--	--	--	--	--	--	--	--	--	--	--	--	--	--	--	--	--	--	--	--	--
c10608_g1	SC	2048.00	183.47	1008	291235233	XP_002737543.1	1122	5.30342e-151	PREDICTED: voltage-dependent anion-selective channel protein 2-like [Saccoglossus kowalevskii]	--	--	--	--	--	K15040	VDAC2	voltage-dependent anion channel protein 2	http://www.genome.jp/dbget-bin/www_bget?ko:K15040	P81004	1068	3.75644e-144	Voltage-dependent anion-selective channel protein 2 OS=Xenopus laevis GN=vdac2 PE=1 SV=1	PF01459	Eukaryotic porin	GO:0055085	transmembrane transport	--	--	GO:0005741	mitochondrial outer membrane	KOG3126	Porin/voltage-dependent anion-selective channel protein
c1060_g1	SC	2.00	1.84	298	260794756	XP_002592373.1	153	7.40863e-10	hypothetical protein BRAFLDRAFT_106234 [Branchiostoma floridae]>gi|229277592|gb|EEN48384.1| hypothetical protein BRAFLDRAFT_106234 [Branchiostoma floridae]	--	--	--	--	--	--	--	--	--	--	--	--	--	--	--	--	--	--	--	--	--	--	--
c10610_g1	SC	11.00	3.31	457	390345012	XP_001186817.2	613	1.66687e-71	PREDICTED: telomerase protein component 1 [Strongylocentrotus purpuratus]	--	--	--	--	--	--	--	--	--	Q99973	200	1.00451e-16	Telomerase protein component 1 OS=Homo sapiens GN=TEP1 PE=1 SV=2	--	--	--	--	--	--	--	--	KOG3602	WD40 repeat-containing protein
c10612_g1	SC	2.00	1.48	317	--	--	--	--	--	--	--	--	--	--	--	--	--	--	--	--	--	--	--	--	--	--	--	--	--	--	--	--
c10617_g1	SC	2.00	7.48	226	--	--	--	--	--	--	--	--	--	--	--	--	--	--	--	--	--	--	--	--	--	--	--	--	--	--	--	--
c10618_g1	SC	11.00	5.02	377	--	--	--	--	--	--	--	--	--	--	--	--	--	--	--	--	--	--	--	--	--	--	--	--	--	--	--	--
c10619_g1	SC	35.00	4.22	806	698401793	XP_009706274.1	247	4.31706e-22	PREDICTED: long-chain-fatty-acid--CoA ligase 1-like [Cariama cristata]	--	--	--	--	--	K01897	ACSL, fadD	long-chain acyl-CoA synthetase	http://www.genome.jp/dbget-bin/www_bget?ko:K01897	Q9JID6	229	1.15789e-19	Long-chain-fatty-acid--CoA ligase 1 OS=Cavia porcellus GN=ACSL1 PE=2 SV=1	--	--	--	--	--	--	--	--	KOG1256	Long-chain acyl-CoA synthetases (AMP-forming)
c1061_g1	SC	4.00	5.16	274	--	--	--	--	--	--	--	--	--	--	--	--	--	--	--	--	--	--	--	--	--	--	--	--	--	--	--	--
c10620_g1	SC	5.00	25.80	216	405962614	EKC28272.1	132	4.93417e-08	WW domain-containing oxidoreductase [Crassostrea gigas]	--	--	--	--	--	--	--	--	--	--	--	--	--	PF00106	short chain dehydrogenase	GO:0008152	metabolic process	GO:0016491	oxidoreductase activity	--	--	--	--
c10621_g1	SC	8.00	3.58	380	--	--	--	--	--	--	--	--	--	--	--	--	--	--	--	--	--	--	--	--	--	--	--	--	--	--	--	--
c10622_g1	SC	1.00	0.50	364	--	--	--	--	--	--	--	--	--	--	--	--	--	--	--	--	--	--	--	--	--	--	--	--	--	--	--	--
c10622_g2	SC	1.00	1.56	263	--	--	--	--	--	--	--	--	--	--	--	--	--	--	--	--	--	--	--	--	--	--	--	--	--	--	--	--
c10623_g1	SC	3.00	7.85	239	--	--	--	--	--	--	--	--	--	--	--	--	--	--	--	--	--	--	--	--	--	--	--	--	--	--	--	--
c10625_g1	SC	8.00	1.81	534	--	--	--	--	--	--	--	--	--	--	--	--	--	--	--	--	--	--	--	--	--	--	--	--	--	--	--	--
c10626_g1	SC	1.00	1.65	260	--	--	--	--	--	--	--	--	--	--	--	--	--	--	--	--	--	--	--	--	--	--	--	--	--	--	--	--
c10626_g2	SC	2.00	9.02	220	--	--	--	--	--	--	--	--	--	--	--	--	--	--	--	--	--	--	--	--	--	--	--	--	--	--	--	--
c10627_g1	SC	6.00	2.00	434	--	--	--	--	--	--	--	--	--	--	--	--	--	--	--	--	--	--	--	--	--	--	--	--	--	--	--	--
c10628_g1	SC	3.00	1.84	337	675874900	XP_009023010.1	164	4.72294e-13	hypothetical protein HELRODRAFT_153316, partial [Helobdella robusta]>gi|675888930|ref|XP_009029967.1| hypothetical protein HELRODRAFT_153671, partial [Helobdella robusta]>gi|555688658|gb|ESN91890.1| hypothetical protein HELRODRAFT_153671, partial [Helobdella robusta]>gi|555695878|gb|ESN99110.1| hypothetical protein HELRODRAFT_153316, partial [Helobdella robusta]	--	--	--	--	--	--	--	--	--	Q5SVZ6	127	1.01497e-07	Zinc finger MYM-type protein 1 OS=Homo sapiens GN=ZMYM1 PE=2 SV=1	PF05699	hAT family C-terminal dimerisation region	--	--	GO:0046983	protein dimerization activity	--	--	--	--
c10631_g1	SC	13.00	2.71	560	--	--	--	--	--	--	--	--	--	--	--	--	--	--	--	--	--	--	--	--	--	--	--	--	--	--	--	--
c10633_g1	SC	7.00	1.84	490	--	--	--	--	--	--	--	--	--	--	--	--	--	--	--	--	--	--	--	--	--	--	--	--	--	--	--	--
c10634_g1	SC	4.00	1.50	410	--	--	--	--	--	--	--	--	--	--	--	--	--	--	--	--	--	--	--	--	--	--	--	--	--	--	--	--
c10637_g1	SC	1.00	4.10	223	--	--	--	--	--	--	--	--	--	--	--	--	--	--	--	--	--	--	--	--	--	--	--	--	--	--	--	--
c10638_g1	SC	3.00	2.35	312	--	--	--	--	--	--	--	--	--	--	--	--	--	--	--	--	--	--	--	--	--	--	--	--	--	--	--	--
c1063_g1	SC	57.00	3.06	1535	--	--	--	--	--	--	--	--	--	--	--	--	--	--	--	--	--	--	--	--	--	--	--	--	--	--	--	--
c10641_g1	SC	4.00	1.79	380	--	--	--	--	--	--	--	--	--	--	--	--	--	--	--	--	--	--	--	--	--	--	--	--	--	--	--	--
c10642_g1	SC	4.00	2.59	331	--	--	--	--	--	--	--	--	--	--	--	--	--	--	--	--	--	--	--	--	--	--	--	--	--	--	--	--
c10643_g1	SC	1.00	2.43	242	--	--	--	--	--	--	--	--	--	--	--	--	--	--	--	--	--	--	--	--	--	--	--	--	--	--	--	--
c10643_g2	SC	4.00	1.61	398	--	--	--	--	--	--	--	--	--	--	--	--	--	--	--	--	--	--	--	--	--	--	--	--	--	--	--	--
c10644_g1	SC	1.00	7.79	205	--	--	--	--	--	--	--	--	--	--	--	--	--	--	--	--	--	--	--	--	--	--	--	--	--	--	--	--
c10646_g1	SC	11.00	4.92	380	--	--	--	--	--	--	--	--	--	--	--	--	--	--	--	--	--	--	--	--	--	--	--	--	--	--	--	--
c10647_g1	SC	21.00	2.19	898	--	--	--	--	--	--	--	--	--	--	--	--	--	--	--	--	--	--	--	--	--	--	--	--	--	--	--	--
c10647_g2	SC	16.00	2.21	731	--	--	--	--	--	--	--	--	--	--	--	--	--	--	--	--	--	--	--	--	--	--	--	--	--	--	--	--
c10648_g1	SC	10.00	2.31	528	--	--	--	--	--	--	--	--	--	--	--	--	--	--	--	--	--	--	--	--	--	--	--	--	--	--	--	--
c1064_g1	SC	9.00	1.60	618	--	--	--	--	--	--	--	--	--	--	--	--	--	--	--	--	--	--	--	--	--	--	--	--	--	--	--	--
c10650_g1	SC	4.00	10.47	239	556976303	XP_005995623.1	124	3.00184e-06	PREDICTED: THO complex subunit 2 [Latimeria chalumnae]	--	--	--	--	--	--	--	--	--	--	--	--	--	--	--	--	--	--	--	--	--	--	--
c10651_g1	SC	13.00	1.85	716	780119516	XP_011677703.1	158	9.87486e-10	PREDICTED: transmembrane protein 246-like [Strongylocentrotus purpuratus]	--	--	--	--	--	--	--	--	--	--	--	--	--	PF06072	Alphaherpesvirus tegument protein US9	--	--	--	--	GO:0019033	viral tegument	--	--
c10652_g1	SC	3.00	3.02	291	--	--	--	--	--	--	--	--	--	--	--	--	--	--	--	--	--	--	--	--	--	--	--	--	--	--	--	--
c10653_g1	SC	9.00	4.55	362	--	--	--	--	--	--	--	--	--	--	--	--	--	--	--	--	--	--	--	--	--	--	--	--	--	--	--	--
c10654_g1	SC	11.00	2.60	520	780091268	XP_011674045.1	711	5.54155e-89	PREDICTED: acetyl-coenzyme A synthetase 2-like, mitochondrial [Strongylocentrotus purpuratus]	--	--	--	--	--	K01895	ACSS, acs	acetyl-CoA synthetase	http://www.genome.jp/dbget-bin/www_bget?ko:K01895	Q99NB1	668	5.64157e-82	Acetyl-coenzyme A synthetase 2-like, mitochondrial OS=Mus musculus GN=Acss1 PE=1 SV=1	PF00501	AMP-binding enzyme	GO:0008152	metabolic process	GO:0003824	catalytic activity	--	--	KOG1175	Acyl-CoA synthetase
c10654_g2	SC	10.00	4.81	369	780091268	XP_011674045.1	514	1.37663e-60	PREDICTED: acetyl-coenzyme A synthetase 2-like, mitochondrial [Strongylocentrotus purpuratus]	780091267	XM_011675743.1	88	1.85734e-36	PREDICTED: Strongylocentrotus purpuratus acetyl-coenzyme A synthetase 2-like, mitochondrial (LOC585742), mRNA	K01895	ACSS, acs	acetyl-CoA synthetase	http://www.genome.jp/dbget-bin/www_bget?ko:K01895	Q99NB1	400	7.44833e-45	Acetyl-coenzyme A synthetase 2-like, mitochondrial OS=Mus musculus GN=Acss1 PE=1 SV=1	--	--	--	--	--	--	--	--	KOG1175	Acyl-CoA synthetase
c10656_g1	SC	1.00	9.20	255	--	--	--	--	--	--	--	--	--	--	--	--	--	--	--	--	--	--	--	--	--	--	--	--	--	--	--	--
c10657_g1	SC	62.00	16.45	488	--	--	--	--	--	--	--	--	--	--	--	--	--	--	--	--	--	--	--	--	--	--	--	--	--	--	--	--
c10659_g1	SC	5.00	4.54	299	--	--	--	--	--	--	--	--	--	--	--	--	--	--	--	--	--	--	--	--	--	--	--	--	--	--	--	--
c1065_g1	SC	6.00	3.96	329	--	--	--	--	--	--	--	--	--	--	--	--	--	--	--	--	--	--	PF07684	NOTCH protein	GO:0007275//GO:0007219//GO:0030154	multicellular organismal development//Notch signaling pathway//cell differentiation	--	--	GO:0016021	integral component of membrane	--	--
c10661_g1	SC	2.00	4.43	246	--	--	--	--	--	--	--	--	--	--	--	--	--	--	--	--	--	--	--	--	--	--	--	--	--	--	--	--
c10663_g1	SC	47.00	7.98	637	--	--	--	--	--	--	--	--	--	--	--	--	--	--	--	--	--	--	--	--	--	--	--	--	--	--	--	--
c10665_g1	SC	56.00	5.79	903	--	--	--	--	--	--	--	--	--	--	--	--	--	--	--	--	--	--	--	--	--	--	--	--	--	--	--	--
c10666_g1	SC	7.00	5.66	309	--	--	--	--	--	--	--	--	--	--	--	--	--	--	--	--	--	--	--	--	--	--	--	--	--	--	--	--
c10667_g1	SC	4.00	2.38	341	--	--	--	--	--	--	--	--	--	--	--	--	--	--	--	--	--	--	PF04075	Domain of unknown function (DUF385)	GO:0055114	oxidation-reduction process	GO:0016491	oxidoreductase activity	--	--	--	--
c10667_g2	SC	11.00	1.75	664	--	--	--	--	--	--	--	--	--	--	--	--	--	--	--	--	--	--	PF08499	3'5'-cyclic nucleotide phosphodiesterase N-terminal	GO:0006144	purine nucleobase metabolic process	GO:0004114	3',5'-cyclic-nucleotide phosphodiesterase activity	--	--	--	--
c10668_g1	SC	9.00	2.00	539	780175251	XP_011661252.1	237	5.67568e-21	PREDICTED: uncharacterized protein LOC105436902 [Strongylocentrotus purpuratus]	--	--	--	--	--	--	--	--	--	--	--	--	--	--	--	--	--	--	--	--	--	--	--
c1066_g1	SC	17.00	3.15	602	--	--	--	--	--	--	--	--	--	--	--	--	--	--	--	--	--	--	--	--	--	--	--	--	--	--	--	--
c1066_g2	SC	14.00	1.69	804	--	--	--	--	--	--	--	--	--	--	--	--	--	--	--	--	--	--	--	--	--	--	--	--	--	--	--	--
c10671_g1	SC	2.00	3.88	252	--	--	--	--	--	--	--	--	--	--	--	--	--	--	--	--	--	--	--	--	--	--	--	--	--	--	--	--
c10672_g1	SC	6.00	3.51	343	--	--	--	--	--	--	--	--	--	--	--	--	--	--	--	--	--	--	--	--	--	--	--	--	--	--	--	--
c10675_g1	SC	4.00	1.96	366	--	--	--	--	--	--	--	--	--	--	--	--	--	--	--	--	--	--	--	--	--	--	--	--	--	--	--	--
c10676_g1	SC	4.00	27.65	208	762124394	XP_011445205.1	189	1.51731e-15	PREDICTED: uncharacterized protein LOC105340729 [Crassostrea gigas]	--	--	--	--	--	--	--	--	--	--	--	--	--	PF02611	CDP-diacylglycerol pyrophosphatase	GO:0008654//GO:0046486	phospholipid biosynthetic process//glycerolipid metabolic process	GO:0008715	CDP-diacylglycerol diphosphatase activity	GO:0016020	membrane	--	--
c10678_g1	SC	13.00	4.59	422	--	--	--	--	--	--	--	--	--	--	--	--	--	--	--	--	--	--	--	--	--	--	--	--	--	--	--	--
c10679_g1	SC	8.00	1.62	570	--	--	--	--	--	--	--	--	--	--	--	--	--	--	--	--	--	--	--	--	--	--	--	--	--	--	--	--
c10680_g1	SC	19.00	3.48	782	--	--	--	--	--	--	--	--	--	--	--	--	--	--	--	--	--	--	--	--	--	--	--	--	--	--	--	--
c10681_g1	SC	4.00	3.92	293	--	--	--	--	--	--	--	--	--	--	--	--	--	--	--	--	--	--	--	--	--	--	--	--	--	--	--	--
c10684_g1	SC	4.00	1.70	388	390353427	XP_784071.3	502	2.22485e-60	PREDICTED: coiled-coil domain-containing protein 42 homolog [Strongylocentrotus purpuratus]	--	--	--	--	--	--	--	--	--	A7S8T5	417	4.34277e-49	Coiled-coil domain-containing protein 42 homolog OS=Nematostella vectensis GN=v1g187067 PE=3 SV=1	PF16326//PF03920//PF07544	ABC transporter C-terminal domain//Groucho/TLE N-terminal Q-rich domain//RNA polymerase II transcription mediator complex subunit 9	GO:0006357	regulation of transcription from RNA polymerase II promoter	GO:0001104//GO:0005515//GO:0003677	RNA polymerase II transcription cofactor activity//protein binding//DNA binding	GO:0016592	mediator complex	--	--
c10685_g1	SC	4.00	1.96	366	--	--	--	--	--	--	--	--	--	--	--	--	--	--	--	--	--	--	--	--	--	--	--	--	--	--	--	--
c10686_g1	SC	5.00	5.24	288	--	--	--	--	--	--	--	--	--	--	--	--	--	--	--	--	--	--	--	--	--	--	--	--	--	--	--	--
c10687_g1	SC	3.00	2.14	321	--	--	--	--	--	--	--	--	--	--	--	--	--	--	--	--	--	--	--	--	--	--	--	--	--	--	--	--
c10689_g1	SC	4.00	3.72	297	--	--	--	--	--	--	--	--	--	--	--	--	--	--	--	--	--	--	--	--	--	--	--	--	--	--	--	--
c1068_g1	SC	19.00	2.41	777	--	--	--	--	--	--	--	--	--	--	--	--	--	--	--	--	--	--	--	--	--	--	--	--	--	--	--	--
c10692_g1	SC	4.00	6.60	260	--	--	--	--	--	--	--	--	--	--	--	--	--	--	--	--	--	--	--	--	--	--	--	--	--	--	--	--
c10698_g1	SC	3.00	2.54	305	--	--	--	--	--	--	--	--	--	--	--	--	--	--	--	--	--	--	--	--	--	--	--	--	--	--	--	--
c10699_g1	SC	8.00	1.60	575	390336346	XP_003724329.1	359	5.90774e-37	PREDICTED: LOW QUALITY PROTEIN: kelch-like protein 5 [Strongylocentrotus purpuratus]	--	--	--	--	--	K10442	KLHL1_4_5	kelch-like protein 1/4/5	http://www.genome.jp/dbget-bin/www_bget?ko:K10442	Q9C0H6	319	2.31238e-32	Kelch-like protein 4 OS=Homo sapiens GN=KLHL4 PE=1 SV=2	PF04587//PF07646//PF01344	ADP-specific Phosphofructokinase/Glucokinase conserved region//Kelch motif//Kelch motif	GO:0005975	carbohydrate metabolic process	GO:0016773//GO:0005515	phosphotransferase activity, alcohol group as acceptor//protein binding	--	--	KOG4441	Proteins containing BTB/POZ and Kelch domains, involved in regulatory/signal transduction processes
c1069_g1	SC	51.00	7.75	686	--	--	--	--	--	--	--	--	--	--	--	--	--	--	--	--	--	--	--	--	--	--	--	--	--	--	--	--
c106_g1	SC	12.00	5.99	373	--	--	--	--	--	--	--	--	--	--	--	--	--	--	--	--	--	--	--	--	--	--	--	--	--	--	--	--
c10700_g1	SC	6.00	1.90	445	675386020	KFM78917.1	146	1.38099e-08	Baculoviral IAP repeat-containing protein 2, partial [Stegodyphus mimosarum]	--	--	--	--	--	--	--	--	--	A9JTP3	130	3.43015e-08	Baculoviral IAP repeat-containing protein 7 OS=Xenopus tropicalis GN=birc7 PE=2 SV=1	--	--	--	--	--	--	--	--	--	--
c10701_g1	SC	54.00	6.54	804	--	--	--	--	--	--	--	--	--	--	--	--	--	--	--	--	--	--	--	--	--	--	--	--	--	--	--	--
c10703_g1	SC	7.00	2.47	422	--	--	--	--	--	--	--	--	--	--	--	--	--	--	--	--	--	--	--	--	--	--	--	--	--	--	--	--
c10704_g1	SC	10.00	2.43	512	156362044	XP_001625592.1	191	7.41215e-15	predicted protein [Nematostella vectensis]>gi|156212432|gb|EDO33492.1| predicted protein, partial [Nematostella vectensis]	--	--	--	--	--	--	--	--	--	--	--	--	--	--	--	--	--	--	--	--	--	--	--
c10705_g1	SC	3.00	3.28	351	--	--	--	--	--	--	--	--	--	--	--	--	--	--	--	--	--	--	--	--	--	--	--	--	--	--	--	--
c10706_g1	SC	44.00	2.96	1268	--	--	--	--	--	--	--	--	--	--	--	--	--	--	--	--	--	--	PF08519	Replication factor RFC1 C terminal domain	GO:0006260	DNA replication	GO:0003689//GO:0005524	DNA clamp loader activity//ATP binding	GO:0042575//GO:0005663	DNA polymerase complex//DNA replication factor C complex	--	--
c10708_g1	SC	11.00	1.84	643	--	--	--	--	--	--	--	--	--	--	--	--	--	--	--	--	--	--	--	--	--	--	--	--	--	--	--	--
c10709_g1	SC	1.00	6.17	211	--	--	--	--	--	--	--	--	--	--	--	--	--	--	--	--	--	--	--	--	--	--	--	--	--	--	--	--
c1070_g1	SC	26.00	1.77	1254	780139498	XP_011680441.1	1091	5.26908e-130	PREDICTED: cubilin [Strongylocentrotus purpuratus]	--	--	--	--	--	K14616	CUBN	cubilin	http://www.genome.jp/dbget-bin/www_bget?ko:K14616	Q9JLB4	642	1.47565e-71	Cubilin OS=Mus musculus GN=Cubn PE=1 SV=3	--	--	--	--	--	--	--	--	KOG4292	Cubilin, multiligand receptor mediating cobalamin absorption
c10711_g1	SC	6.00	2.08	426	--	--	--	--	--	--	--	--	--	--	--	--	--	--	--	--	--	--	--	--	--	--	--	--	--	--	--	--
c10712_g1	SC	11.00	3.31	457	--	--	--	--	--	--	--	--	--	--	--	--	--	--	--	--	--	--	--	--	--	--	--	--	--	--	--	--
c10713_g1	SC	3.00	7.29	242	--	--	--	--	--	--	--	--	--	--	--	--	--	--	--	--	--	--	--	--	--	--	--	--	--	--	--	--
c10716_g1	SC	4.00	2.32	344	--	--	--	--	--	--	--	--	--	--	--	--	--	--	--	--	--	--	--	--	--	--	--	--	--	--	--	--
c10717_g1	SC	14.00	3.08	543	--	--	--	--	--	--	--	--	--	--	--	--	--	--	--	--	--	--	--	--	--	--	--	--	--	--	--	--
c10718_g1	SC	11.00	2.54	528	780103935	XP_011675609.1	254	1.23765e-22	PREDICTED: endoplasmic reticulum membrane-associated RNA degradation protein isoform X3 [Strongylocentrotus purpuratus]	--	--	--	--	--	--	--	--	--	Q3B8R1	214	1.66307e-18	Endoplasmic reticulum membrane-associated RNA degradation protein OS=Rattus norvegicus GN=Ermard PE=2 SV=2	--	--	--	--	--	--	--	--	--	--
c10719_g1	SC	12.00	2.64	543	--	--	--	--	--	--	--	--	--	--	--	--	--	--	--	--	--	--	PF00451	Scorpion short toxin, BmKK2	GO:0006810//GO:0009405	transport//pathogenesis	GO:0008200	ion channel inhibitor activity	GO:0005576	extracellular region	--	--
c1071_g1	SC	56.00	4.01	1646	--	--	--	--	--	--	--	--	--	--	--	--	--	--	--	--	--	--	PF05676	NADH-ubiquinone oxidoreductase B18 subunit (NDUFB7)	GO:0006744//GO:0006814//GO:0006120//GO:0006118//GO:0015992	ubiquinone biosynthetic process//sodium ion transport//mitochondrial electron transport, NADH to ubiquinone//obsolete electron transport//proton transport	GO:0003954//GO:0008137	NADH dehydrogenase activity//NADH dehydrogenase (ubiquinone) activity	GO:0005739	mitochondrion	--	--
c10721_g1	SC	104.00	13.13	780	--	--	--	--	--	--	--	--	--	--	--	--	--	--	--	--	--	--	PF03800	Nuf2 family	GO:0007067	mitotic nuclear division	--	--	GO:0000775	chromosome, centromeric region	--	--
c10722_g1	SC	15.00	3.23	550	--	--	--	--	--	--	--	--	--	--	--	--	--	--	--	--	--	--	--	--	--	--	--	--	--	--	--	--
c10723_g1	SC	1.00	2.62	239	--	--	--	--	--	--	--	--	--	--	--	--	--	--	--	--	--	--	--	--	--	--	--	--	--	--	--	--
c10723_g2	SC	2.00	4.14	249	--	--	--	--	--	--	--	--	--	--	--	--	--	--	--	--	--	--	--	--	--	--	--	--	--	--	--	--
c10725_g1	SC	11.00	1.86	639	--	--	--	--	--	--	--	--	--	--	--	--	--	--	--	--	--	--	--	--	--	--	--	--	--	--	--	--
c10726_g1	SC	1.00	1.18	280	--	--	--	--	--	--	--	--	--	--	--	--	--	--	--	--	--	--	--	--	--	--	--	--	--	--	--	--
c10727_g1	SC	3.00	1.84	337	--	--	--	--	--	--	--	--	--	--	--	--	--	--	--	--	--	--	--	--	--	--	--	--	--	--	--	--
c10729_g1	SC	16.00	2.65	647	--	--	--	--	--	--	--	--	--	--	--	--	--	--	--	--	--	--	--	--	--	--	--	--	--	--	--	--
c1072_g1	SC	18.00	6.99	404	--	--	--	--	--	--	--	--	--	--	--	--	--	--	--	--	--	--	--	--	--	--	--	--	--	--	--	--
c10731_g1	SC	2.00	2.54	275	--	--	--	--	--	--	--	--	--	--	--	--	--	--	--	--	--	--	--	--	--	--	--	--	--	--	--	--
c10733_g1	SC	5.00	2.03	396	--	--	--	--	--	--	--	--	--	--	--	--	--	--	--	--	--	--	--	--	--	--	--	--	--	--	--	--
c10734_g1	SC	6.00	4.36	319	--	--	--	--	--	--	--	--	--	--	--	--	--	--	--	--	--	--	--	--	--	--	--	--	--	--	--	--
c10737_g1	SC	12.00	1.55	769	--	--	--	--	--	--	--	--	--	--	--	--	--	--	--	--	--	--	--	--	--	--	--	--	--	--	--	--
c10738_g1	SC	2.00	3.12	263	--	--	--	--	--	--	--	--	--	--	--	--	--	--	--	--	--	--	PF02931	Neurotransmitter-gated ion-channel ligand binding domain	GO:0006810//GO:0006811	transport//ion transport	GO:0005230	extracellular ligand-gated ion channel activity	GO:0016020	membrane	--	--
c10739_g1	SC	9.00	3.09	428	--	--	--	--	--	--	--	--	--	--	--	--	--	--	--	--	--	--	--	--	--	--	--	--	--	--	--	--
c10740_g1	SC	28.00	13.47	369	--	--	--	--	--	--	--	--	--	--	--	--	--	--	--	--	--	--	--	--	--	--	--	--	--	--	--	--
c10741_g1	SC	2.00	2.25	283	688612473	XP_009295334.1	328	1.40963e-34	PREDICTED: uncharacterized protein LOC103909708 [Danio rerio]	--	--	--	--	--	--	--	--	--	P04323	215	1.77801e-19	Retrovirus-related Pol polyprotein from transposon 17.6 OS=Drosophila melanogaster GN=pol PE=3 SV=1	--	--	--	--	--	--	--	--	KOG0017	FOG: Transposon-encoded proteins with TYA, reverse transcriptase, integrase domains in various combinations
c10742_g1	SC	11.00	4.27	404	390347095	XP_792047.2	254	8.98814e-24	PREDICTED: CST complex subunit STN1 isoform X1 [Strongylocentrotus purpuratus]	--	--	--	--	--	--	--	--	--	Q9H668	207	1.07185e-18	CST complex subunit STN1 OS=Homo sapiens GN=OBFC1 PE=1 SV=2	PF01336	OB-fold nucleic acid binding domain	--	--	GO:0003676	nucleic acid binding	--	--	--	--
c10743_g1	SC	9.00	3.40	409	--	--	--	--	--	--	--	--	--	--	--	--	--	--	--	--	--	--	--	--	--	--	--	--	--	--	--	--
c10744_g1	SC	9.00	5.44	339	--	--	--	--	--	--	--	--	--	--	--	--	--	--	--	--	--	--	PF03419	Sporulation factor SpoIIGA	GO:0006508//GO:0030436	proteolysis//asexual sporulation	GO:0004190	aspartic-type endopeptidase activity	--	--	--	--
c10745_g2	SC	6.00	3.12	358	--	--	--	--	--	--	--	--	--	--	--	--	--	--	--	--	--	--	--	--	--	--	--	--	--	--	--	--
c10746_g1	SC	1.00	1.53	264	--	--	--	--	--	--	--	--	--	--	--	--	--	--	--	--	--	--	--	--	--	--	--	--	--	--	--	--
c10747_g1	SC	13.00	4.52	425	--	--	--	--	--	--	--	--	--	--	--	--	--	--	--	--	--	--	--	--	--	--	--	--	--	--	--	--
c10748_g1	SC	10.00	3.70	413	--	--	--	--	--	--	--	--	--	--	--	--	--	--	--	--	--	--	--	--	--	--	--	--	--	--	--	--
c10749_g1	SC	4.00	2.91	319	--	--	--	--	--	--	--	--	--	--	--	--	--	--	--	--	--	--	--	--	--	--	--	--	--	--	--	--
c10750_g1	SC	11.00	11.85	286	--	--	--	--	--	--	--	--	--	--	--	--	--	--	--	--	--	--	--	--	--	--	--	--	--	--	--	--
c10750_g2	SC	4.00	1.37	429	--	--	--	--	--	--	--	--	--	--	--	--	--	--	--	--	--	--	--	--	--	--	--	--	--	--	--	--
c10751_g1	SC	13.00	2.14	651	--	--	--	--	--	--	--	--	--	--	--	--	--	--	--	--	--	--	--	--	--	--	--	--	--	--	--	--
c10752_g1	SC	175.00	19.26	862	--	--	--	--	--	--	--	--	--	--	--	--	--	--	--	--	--	--	--	--	--	--	--	--	--	--	--	--
c10753_g1	SC	2.00	3.57	256	--	--	--	--	--	--	--	--	--	--	--	--	--	--	--	--	--	--	PF03872	Anti sigma-E protein RseA, N-terminal domain	--	--	GO:0016989	sigma factor antagonist activity	--	--	--	--
c10753_g2	SC	4.00	5.25	273	--	--	--	--	--	--	--	--	--	--	--	--	--	--	--	--	--	--	--	--	--	--	--	--	--	--	--	--
c10755_g1	SC	14.00	1.84	759	291238184	XP_002739011.1	405	8.8312e-44	PREDICTED: UDP-GlcNAc:betaGal beta-1,3-N-acetylglucosaminyltransferase-like protein 1-like [Saccoglossus kowalevskii]	--	--	--	--	--	--	--	--	--	Q67FW5	354	1.17879e-37	UDP-GlcNAc:betaGal beta-1,3-N-acetylglucosaminyltransferase-like protein 1 OS=Homo sapiens GN=B3GNTL1 PE=2 SV=2	--	--	--	--	--	--	--	--	--	--
c10756_g1	SC	11.00	3.08	474	--	--	--	--	--	--	--	--	--	--	--	--	--	--	--	--	--	--	--	--	--	--	--	--	--	--	--	--
c10757_g1	SC	11.00	16.86	264	--	--	--	--	--	--	--	--	--	--	--	--	--	--	--	--	--	--	--	--	--	--	--	--	--	--	--	--
c10758_g1	SC	30.00	3.36	851	736153680	XP_010764284.1	154	9.37274e-09	PREDICTED: receptor-type tyrosine-protein phosphatase eta-like, partial [Notothenia coriiceps]	--	--	--	--	--	--	--	--	--	P35992	133	2.27215e-07	Tyrosine-protein phosphatase 10D OS=Drosophila melanogaster GN=Ptp10D PE=1 SV=4	PF00041	Fibronectin type III domain	--	--	GO:0005515	protein binding	--	--	--	--
c10759_g1	SC	8.00	2.73	429	780086735	XP_011673503.1	282	1.29177e-26	PREDICTED: uncharacterized protein LOC100889813 [Strongylocentrotus purpuratus]	--	--	--	--	--	--	--	--	--	--	--	--	--	PF08586	RSC complex, Rsc14/Ldb7 subunit	GO:0043044	ATP-dependent chromatin remodeling	--	--	GO:0016586	RSC complex	--	--
c1075_g1	SC	4.00	2.04	361	--	--	--	--	--	--	--	--	--	--	--	--	--	--	--	--	--	--	--	--	--	--	--	--	--	--	--	--
c10760_g1	SC	62.00	4.87	1119	115625750	XP_780657.2	190	9.13779e-13	PREDICTED: KN motif and ankyrin repeat domain-containing protein 1 [Strongylocentrotus purpuratus]>gi|779986592|ref|XP_011662339.1| PREDICTED: KN motif and ankyrin repeat domain-containing protein 1 [Strongylocentrotus purpuratus]	--	--	--	--	--	--	--	--	--	--	--	--	--	PF01080//PF11744//PF02535	Presenilin//Aluminium activated malate transporter//ZIP Zinc transporter	GO:0030001//GO:0055085//GO:0015743	metal ion transport//transmembrane transport//malate transport	GO:0046873//GO:0004190	metal ion transmembrane transporter activity//aspartic-type endopeptidase activity	GO:0016021//GO:0016020	integral component of membrane//membrane	--	--
c10761_g1	SC	4.00	1.31	437	--	--	--	--	--	--	--	--	--	--	--	--	--	--	--	--	--	--	--	--	--	--	--	--	--	--	--	--
c10762_g1	SC	8.00	2.69	432	--	--	--	--	--	--	--	--	--	--	--	--	--	--	--	--	--	--	PF00096	Zinc finger, C2H2 type	--	--	GO:0046872	metal ion binding	--	--	--	--
c10764_g1	SC	9.00	2.37	490	780153921	XP_011682099.1	372	6.03687e-38	PREDICTED: protein fantom isoform X4 [Strongylocentrotus purpuratus]	--	--	--	--	--	K16550	RPGRIP1L	protein fantom	http://www.genome.jp/dbget-bin/www_bget?ko:K16550	Q8CG73	287	4.09901e-28	Protein fantom OS=Mus musculus GN=Rpgrip1l PE=1 SV=2	PF00168	C2 domain	--	--	GO:0005515	protein binding	--	--	--	--
c10766_g1	SC	56.00	4.30	1138	--	--	--	--	--	--	--	--	--	--	--	--	--	--	--	--	--	--	--	--	--	--	--	--	--	--	--	--
c10768_g1	SC	13.00	1.19	989	--	--	--	--	--	--	--	--	--	--	--	--	--	--	--	--	--	--	--	--	--	--	--	--	--	--	--	--
c10768_g2	SC	7.00	2.19	448	--	--	--	--	--	--	--	--	--	--	--	--	--	--	--	--	--	--	--	--	--	--	--	--	--	--	--	--
c10769_g1	SC	2.00	2.96	266	--	--	--	--	--	--	--	--	--	--	--	--	--	--	--	--	--	--	--	--	--	--	--	--	--	--	--	--
c1076_g1	SC	106.00	3.81	2180	390344983	XP_784961.3	398	5.97533e-37	PREDICTED: arginine-glutamic acid dipeptide repeats protein isoform X1 [Strongylocentrotus purpuratus]	--	--	--	--	--	K05628	RERE	arginine-glutamic acid dipeptide repeats protein	http://www.genome.jp/dbget-bin/www_bget?ko:K05628	Q9P2R6	179	4.7565e-12	Arginine-glutamic acid dipeptide repeats protein OS=Homo sapiens GN=RERE PE=1 SV=2	--	--	--	--	--	--	--	--	--	--
c10770_g1	SC	7.00	4.75	326	390356166	XP_795163.3	215	2.3273e-18	PREDICTED: meiosis-specific nuclear structural protein 1 [Strongylocentrotus purpuratus]	--	--	--	--	--	--	--	--	--	Q6PBA8	178	9.4864e-15	Meiosis-specific nuclear structural protein 1 OS=Danio rerio GN=mns1 PE=2 SV=1	--	--	--	--	--	--	--	--	--	--
c10770_g2	SC	20.00	2.34	824	390356166	XP_795163.3	257	2.59296e-22	PREDICTED: meiosis-specific nuclear structural protein 1 [Strongylocentrotus purpuratus]	156408741	XM_001641965.1	56	2.68377e-18	Nematostella vectensis predicted protein (NEMVEDRAFT_v1g176892) partial mRNA	--	--	--	--	A4IJ21	182	7.10193e-14	Meiosis-specific nuclear structural protein 1 OS=Xenopus tropicalis GN=mns1 PE=2 SV=1	--	--	--	--	--	--	--	--	--	--
c10771_g1	SC	11.00	2.20	575	--	--	--	--	--	--	--	--	--	--	--	--	--	--	--	--	--	--	--	--	--	--	--	--	--	--	--	--
c10772_g1	SC	1.00	8.45	203	--	--	--	--	--	--	--	--	--	--	--	--	--	--	--	--	--	--	--	--	--	--	--	--	--	--	--	--
c10773_g1	SC	7.00	1.83	492	780055268	XP_011669688.1	140	7.05456e-08	PREDICTED: uncharacterized protein LOC105440823 isoform X2 [Strongylocentrotus purpuratus]	--	--	--	--	--	--	--	--	--	--	--	--	--	--	--	--	--	--	--	--	--	--	--
c10774_g1	SC	30.00	4.40	702	--	--	--	--	--	--	--	--	--	--	--	--	--	--	--	--	--	--	--	--	--	--	--	--	--	--	--	--
c10775_g1	SC	3.00	4.00	272	--	--	--	--	--	--	--	--	--	--	--	--	--	--	--	--	--	--	--	--	--	--	--	--	--	--	--	--
c10777_g1	SC	1.00	2.75	237	--	--	--	--	--	--	--	--	--	--	--	--	--	--	--	--	--	--	--	--	--	--	--	--	--	--	--	--
c10779_g1	SC	12.00	2.71	534	--	--	--	--	--	--	--	--	--	--	--	--	--	--	--	--	--	--	--	--	--	--	--	--	--	--	--	--
c1077_g1	SC	24.00	1.82	1150	--	--	--	--	--	--	--	--	--	--	--	--	--	--	--	--	--	--	--	--	--	--	--	--	--	--	--	--
c10780_g1	SC	5.00	5.31	293	--	--	--	--	--	--	--	--	--	--	--	--	--	--	--	--	--	--	--	--	--	--	--	--	--	--	--	--
c10781_g1	SC	15.00	2.19	704	780111737	XP_011676579.1	296	6.76973e-27	PREDICTED: nuclear pore complex protein Nup214 [Strongylocentrotus purpuratus]	--	--	--	--	--	K14317	NUP214, CAN	nuclear pore complex protein Nup214	http://www.genome.jp/dbget-bin/www_bget?ko:K14317	P35658	225	4.09185e-19	Nuclear pore complex protein Nup214 OS=Homo sapiens GN=NUP214 PE=1 SV=2	PF07147	Mitochondrial 28S ribosomal protein S30 (PDCD9)	GO:0006412//GO:0042254	translation//ribosome biogenesis	GO:0003735	structural constituent of ribosome	GO:0005840//GO:0005739	ribosome//mitochondrion	KOG3630	Nuclear pore complex, Nup214/CAN component
c10782_g1	SC	3.00	0.80	497	--	--	--	--	--	--	--	--	--	--	--	--	--	--	--	--	--	--	--	--	--	--	--	--	--	--	--	--
c10783_g1	SC	5.00	6.45	274	--	--	--	--	--	--	--	--	--	--	--	--	--	--	--	--	--	--	--	--	--	--	--	--	--	--	--	--
c10784_g1	SC	4.00	2.34	343	--	--	--	--	--	--	--	--	--	--	--	--	--	--	--	--	--	--	--	--	--	--	--	--	--	--	--	--
c10785_g1	SC	6.00	6.65	284	390359634	XP_784044.3	133	2.03222e-07	PREDICTED: cyclin-dependent kinase-like 2 [Strongylocentrotus purpuratus]	--	--	--	--	--	--	--	--	--	--	--	--	--	PF00309//PF01080//PF02724//PF11705	Sigma-54 factor, Activator interacting domain (AID)//Presenilin//CDC45-like protein//DNA-directed RNA polymerase III subunit Rpc31	GO:0006270//GO:0006355//GO:0006352//GO:0006206//GO:0006144//GO:0006351//GO:0006359	DNA replication initiation//regulation of transcription, DNA-templated//DNA-templated transcription, initiation//pyrimidine nucleobase metabolic process//purine nucleobase metabolic process//transcription, DNA-templated//regulation of transcription from RNA polymerase III promoter	GO:0004190//GO:0003677//GO:0016987//GO:0003700//GO:0003899	aspartic-type endopeptidase activity//DNA binding//sigma factor activity//transcription factor activity, sequence-specific DNA binding//DNA-directed RNA polymerase activity	GO:0005730//GO:0005667//GO:0016021	nucleolus//transcription factor complex//integral component of membrane	--	--
c10786_g1	SC	19.00	3.83	572	--	--	--	--	--	--	--	--	--	--	--	--	--	--	--	--	--	--	PF00892	EamA-like transporter family	--	--	--	--	GO:0016020//GO:0016021	membrane//integral component of membrane	--	--
c10787_g1	SC	2.00	1.06	355	--	--	--	--	--	--	--	--	--	--	--	--	--	--	--	--	--	--	--	--	--	--	--	--	--	--	--	--
c10788_g1	SC	11.00	2.82	497	--	--	--	--	--	--	--	--	--	--	--	--	--	--	--	--	--	--	--	--	--	--	--	--	--	--	--	--
c10789_g1	SC	3.00	1.36	378	405953155	EKC20870.1	150	2.60603e-09	Protogenin B [Crassostrea gigas]	--	--	--	--	--	--	--	--	--	Q8TDY8	129	6.53765e-08	Immunoglobulin superfamily DCC subclass member 4 OS=Homo sapiens GN=IGDCC4 PE=1 SV=1	PF00041//PF16656	Fibronectin type III domain//Purple acid Phosphatase, N-terminal domain	GO:0019497//GO:0006771	hexachlorocyclohexane metabolic process//riboflavin metabolic process	GO:0046872//GO:0003993//GO:0005515	metal ion binding//acid phosphatase activity//protein binding	--	--	KOG3510	FOG: Immunoglobulin C-2 Type/fibronectin type III domains
c10789_g2	SC	1.00	1.05	288	--	--	--	--	--	--	--	--	--	--	--	--	--	--	--	--	--	--	PF00041	Fibronectin type III domain	--	--	GO:0005515	protein binding	--	--	--	--
c1078_g1	SC	14.00	3.22	529	--	--	--	--	--	--	--	--	--	--	--	--	--	--	--	--	--	--	PF00711//PF07649	Beta defensin//C1-like domain	GO:0006952//GO:0055114	defense response//oxidation-reduction process	GO:0047134	protein-disulfide reductase activity	GO:0005576	extracellular region	--	--
c10790_g1	SC	9.00	2.86	444	--	--	--	--	--	--	--	--	--	--	--	--	--	--	--	--	--	--	--	--	--	--	--	--	--	--	--	--
c10791_g1	SC	4.00	3.63	299	--	--	--	--	--	--	--	--	--	--	--	--	--	--	--	--	--	--	PF07651	ANTH domain	--	--	GO:0005543	phospholipid binding	--	--	--	--
c10793_g1	SC	19.00	1.90	926	--	--	--	--	--	--	--	--	--	--	--	--	--	--	--	--	--	--	--	--	--	--	--	--	--	--	--	--
c10794_g1	SC	27.00	6.57	512	--	--	--	--	--	--	--	--	--	--	--	--	--	--	--	--	--	--	--	--	--	--	--	--	--	--	--	--
c10797_g1	SC	6.00	10.93	255	--	--	--	--	--	--	--	--	--	--	--	--	--	--	--	--	--	--	--	--	--	--	--	--	--	--	--	--
c10798_g1	SC	40.00	2.44	1374	--	--	--	--	--	--	--	--	--	--	--	--	--	--	--	--	--	--	--	--	--	--	--	--	--	--	--	--
c10799_g1	SC	37.00	3.02	1085	--	--	--	--	--	--	--	--	--	--	--	--	--	--	--	--	--	--	--	--	--	--	--	--	--	--	--	--
c1079_g1	SC	24.00	1.51	1338	--	--	--	--	--	--	--	--	--	--	--	--	--	--	--	--	--	--	--	--	--	--	--	--	--	--	--	--
c107_g2	SC	6.00	8.56	268	--	--	--	--	--	--	--	--	--	--	--	--	--	--	--	--	--	--	--	--	--	--	--	--	--	--	--	--
c10800_g1	SC	5.00	5.17	289	--	--	--	--	--	--	--	--	--	--	--	--	--	--	--	--	--	--	--	--	--	--	--	--	--	--	--	--
c10801_g1	SC	14.00	3.15	536	--	--	--	--	--	--	--	--	--	--	--	--	--	--	--	--	--	--	--	--	--	--	--	--	--	--	--	--
c10806_g1	SC	2.00	6.12	233	--	--	--	--	--	--	--	--	--	--	--	--	--	--	--	--	--	--	--	--	--	--	--	--	--	--	--	--
c10807_g1	SC	12.00	1.92	662	--	--	--	--	--	--	--	--	--	--	--	--	--	--	--	--	--	--	--	--	--	--	--	--	--	--	--	--
c10808_g1	SC	5.00	1.65	436	--	--	--	--	--	--	--	--	--	--	--	--	--	--	--	--	--	--	--	--	--	--	--	--	--	--	--	--
c1080_g1	SC	7.00	2.81	398	--	--	--	--	--	--	--	--	--	--	--	--	--	--	--	--	--	--	--	--	--	--	--	--	--	--	--	--
c10810_g1	SC	3.00	2.16	320	321468721	EFX79705.1	266	9.75496e-25	hypothetical protein DAPPUDRAFT_197333 [Daphnia pulex]	--	--	--	--	--	K06766	NEO1	neogenin	http://www.genome.jp/dbget-bin/www_bget?ko:K06766	P97603	203	1.15299e-17	Neogenin (Fragment) OS=Rattus norvegicus GN=Neo1 PE=2 SV=1	PF00041	Fibronectin type III domain	--	--	GO:0005515	protein binding	--	--	KOG4221	Receptor mediating netrin-dependent axon guidance
c10811_g1	SC	3.00	3.58	279	--	--	--	--	--	--	--	--	--	--	--	--	--	--	--	--	--	--	--	--	--	--	--	--	--	--	--	--
c10812_g1	SC	12.00	4.14	427	--	--	--	--	--	--	--	--	--	--	--	--	--	--	--	--	--	--	--	--	--	--	--	--	--	--	--	--
c10813_g1	SC	1.00	4.82	218	--	--	--	--	--	--	--	--	--	--	--	--	--	--	--	--	--	--	--	--	--	--	--	--	--	--	--	--
c10815_g1	SC	3.00	3.06	362	--	--	--	--	--	--	--	--	--	--	--	--	--	--	--	--	--	--	--	--	--	--	--	--	--	--	--	--
c10816_g1	SC	3.00	22.44	206	--	--	--	--	--	--	--	--	--	--	--	--	--	--	--	--	--	--	--	--	--	--	--	--	--	--	--	--
c10818_g1	SC	4.00	4.56	282	--	--	--	--	--	--	--	--	--	--	--	--	--	--	--	--	--	--	--	--	--	--	--	--	--	--	--	--
c10819_g1	SC	2.00	2.25	283	--	--	--	--	--	--	--	--	--	--	--	--	--	--	--	--	--	--	--	--	--	--	--	--	--	--	--	--
c1081_g1	SC	10.00	9.42	296	--	--	--	--	--	--	--	--	--	--	--	--	--	--	--	--	--	--	--	--	--	--	--	--	--	--	--	--
c10820_g1	SC	7.00	1.75	504	--	--	--	--	--	--	--	--	--	--	--	--	--	--	--	--	--	--	--	--	--	--	--	--	--	--	--	--
c10821_g1	SC	11.00	2.49	534	--	--	--	--	--	--	--	--	--	--	--	--	--	--	--	--	--	--	--	--	--	--	--	--	--	--	--	--
c10823_g1	SC	1.00	6.40	210	--	--	--	--	--	--	--	--	--	--	--	--	--	--	--	--	--	--	--	--	--	--	--	--	--	--	--	--
c10824_g1	SC	9.00	1.82	570	--	--	--	--	--	--	--	--	--	--	--	--	--	--	--	--	--	--	--	--	--	--	--	--	--	--	--	--
c10825_g1	SC	3.00	1.37	377	780008674	XP_011663462.1	174	1.98731e-26	PREDICTED: uncharacterized protein LOC762694 [Strongylocentrotus purpuratus]	--	--	--	--	--	--	--	--	--	P04323	120	1.56725e-14	Retrovirus-related Pol polyprotein from transposon 17.6 OS=Drosophila melanogaster GN=pol PE=3 SV=1	--	--	--	--	--	--	--	--	KOG0017	FOG: Transposon-encoded proteins with TYA, reverse transcriptase, integrase domains in various combinations
c10826_g1	SC	21.00	1.81	1037	617452461	XP_007569081.1	474	5.55121e-54	PREDICTED: transmembrane protein 65 [Poecilia formosa]	--	--	--	--	--	--	--	--	--	Q0VCH8	436	1.02778e-49	Transmembrane protein 65 OS=Bos taurus GN=TMEM65 PE=2 SV=1	--	--	--	--	--	--	--	--	KOG4619	Uncharacterized conserved protein
c10827_g1	SC	5.00	7.95	262	--	--	--	--	--	--	--	--	--	--	--	--	--	--	--	--	--	--	--	--	--	--	--	--	--	--	--	--
c10829_g1	SC	1.00	2.98	234	--	--	--	--	--	--	--	--	--	--	--	--	--	--	--	--	--	--	--	--	--	--	--	--	--	--	--	--
c1082_g1	SC	15.00	1.40	976	780158620	XP_011682739.1	363	6.7935e-38	PREDICTED: janus kinase and microtubule-interacting protein 1-like, partial [Strongylocentrotus purpuratus]	--	--	--	--	--	--	--	--	--	Q96AA8	262	2.13243e-23	Janus kinase and microtubule-interacting protein 2 OS=Homo sapiens GN=JAKMIP2 PE=1 SV=1	--	--	--	--	--	--	--	--	--	--
c10831_g1	SC	4.00	2.02	362	--	--	--	--	--	--	--	--	--	--	--	--	--	--	--	--	--	--	--	--	--	--	--	--	--	--	--	--
c10832_g1	SC	28.00	4.80	633	--	--	--	--	--	--	--	--	--	--	--	--	--	--	--	--	--	--	--	--	--	--	--	--	--	--	--	--
c10833_g1	SC	3.00	7.85	239	--	--	--	--	--	--	--	--	--	--	--	--	--	--	--	--	--	--	--	--	--	--	--	--	--	--	--	--
c10834_g1	SC	9.00	2.68	459	--	--	--	--	--	--	--	--	--	--	--	--	--	--	--	--	--	--	--	--	--	--	--	--	--	--	--	--
c10837_g1	SC	1.00	6.65	209	--	--	--	--	--	--	--	--	--	--	--	--	--	--	--	--	--	--	--	--	--	--	--	--	--	--	--	--
c10838_g1	SC	2.00	5.96	234	--	--	--	--	--	--	--	--	--	--	--	--	--	--	--	--	--	--	--	--	--	--	--	--	--	--	--	--
c10839_g1	SC	18.00	1.62	1003	--	--	--	--	--	--	--	--	--	--	--	--	--	--	--	--	--	--	--	--	--	--	--	--	--	--	--	--
c1083_g1	SC	15.00	5.07	431	--	--	--	--	--	--	--	--	--	--	--	--	--	--	--	--	--	--	--	--	--	--	--	--	--	--	--	--
c10840_g1	SC	10.00	3.82	407	--	--	--	--	--	--	--	--	--	--	--	--	--	--	--	--	--	--	--	--	--	--	--	--	--	--	--	--
c10841_g1	SC	456.00	32.49	1210	--	--	--	--	--	--	--	--	--	--	--	--	--	--	--	--	--	--	--	--	--	--	--	--	--	--	--	--
c10842_g1	SC	5.00	2.46	366	688612473	XP_009295334.1	240	5.94242e-22	PREDICTED: uncharacterized protein LOC103909708 [Danio rerio]	--	--	--	--	--	--	--	--	--	Q8I7P9	189	1.04882e-15	Retrovirus-related Pol polyprotein from transposon opus OS=Drosophila melanogaster GN=pol PE=3 SV=1	--	--	--	--	--	--	--	--	KOG0017	FOG: Transposon-encoded proteins with TYA, reverse transcriptase, integrase domains in various combinations
c10843_g1	SC	20.00	2.75	735	--	--	--	--	--	--	--	--	--	--	--	--	--	--	--	--	--	--	--	--	--	--	--	--	--	--	--	--
c10844_g1	SC	3.00	1.56	358	--	--	--	--	--	--	--	--	--	--	--	--	--	--	--	--	--	--	--	--	--	--	--	--	--	--	--	--
c10844_g2	SC	1.00	9.20	201	--	--	--	--	--	--	--	--	--	--	--	--	--	--	--	--	--	--	--	--	--	--	--	--	--	--	--	--
c10845_g1	SC	8.00	2.64	436	--	--	--	--	--	--	--	--	--	--	--	--	--	--	--	--	--	--	--	--	--	--	--	--	--	--	--	--
c10846_g1	SC	31.00	3.05	938	--	--	--	--	--	--	--	--	--	--	--	--	--	--	--	--	--	--	--	--	--	--	--	--	--	--	--	--
c10848_g1	SC	15.00	2.14	715	--	--	--	--	--	--	--	--	--	--	--	--	--	--	--	--	--	--	--	--	--	--	--	--	--	--	--	--
c10850_g1	SC	11.00	2.78	501	--	--	--	--	--	--	--	--	--	--	--	--	--	--	--	--	--	--	--	--	--	--	--	--	--	--	--	--
c10851_g1	SC	82.00	6.71	1083	--	--	--	--	--	--	--	--	--	--	--	--	--	--	--	--	--	--	--	--	--	--	--	--	--	--	--	--
c10852_g1	SC	3.00	1.78	341	--	--	--	--	--	--	--	--	--	--	--	--	--	--	--	--	--	--	--	--	--	--	--	--	--	--	--	--
c10853_g1	SC	8.00	1.41	621	--	--	--	--	--	--	--	--	--	--	--	--	--	--	--	--	--	--	--	--	--	--	--	--	--	--	--	--
[truncated: 97,723 more rows]
