# Supplementary material for: Evidence for a Saponin Biosynthesis Pathway in the Body Wall of the Commercially Significant Sea Cucumber Holothuria scabra
Source: Mar Drugs. 2017 Nov 7;15(11):349. doi: 10.3390/md15110349 (PMC5706039; doi:10.3390/md15110349)
Supplement: Supplementary file 1 [file marinedrugs-15-00349-s001.zip › File S2 (a and b).xlsx]

## Sheet: File S2a
Class	Gene number Body wall	Gene number Radial Nerve
RNA processing and modification	415	36
Chromatin structure and dynamics	164	168
Energy production and conversion	319	227
Cell cycle control, cell division, chromosome partitioning	306	512
Amino acid transport and metabolism	368	163
Nucleotide transport and metabolism	136	50
Carbohydrate transport and metabolism	338	448
Coenzyme transport and metabolism	103	130
Lipid transport and metabolism	414	125
Translation, ribosomal structure and biogenesis	396	1083
Transcription	546	775
Replication, recombination and repair	353	610
Cell wall/membrane/envelope biogenesis	105	483
Cell motility	22	217
Posttranslational modification, protein turnover, chaperones	1060	458
Inorganic ion transport and metabolism	403	100
Secondary metabolites biosynthesis, transport and catabolism	358	175
General function prediction only	2365	1485
Function unknown	639	492
Signal transduction mechanisms	2254	253
Intracellular trafficking, secretion, and vesicular transport	572	362
Defense mechanisms	181	21
Extracellular structures	179	4
Cytoskeleton	458	229
						32.0957

## Sheet: File S2b
component	Class	Gene number Body wall
Molecular	anion binding	372
	cation binding	484
	nucleoside phosphate binding	361
	nucleotide binding	359
	nucleoside binding	351
	ribonucleotide binding	353
Biological	cellular aromatic compound metabolic process	230
	cellular biosynthetic process	187
	cell communication	459
	cellular macromolecule metabolic process	329
	cellular nitrogen compound metabolic process	184
	heterocycle metabolic process	192
	macromolecule metabolic process	344
	nucleobase-containing compound metabolic process	194
	organic substance biosynthetic process	204
	organic cyclic compound metabolic process	242
	organonitrogen compound metabolic process	268
	protein metabolic process	475
	phosphorus metabolic process	437
	regulation of cellular process	393
	small molecule metabolic process	238
	single-organism transport	209
	signal transduction	314
Cellular Component	intrinsic component of membrane	283
